# Supplementary material for: Highly enantioselective synthesis of both enantiomers of tetrahydroquinoxaline derivatives via Ir-catalyzed asymmetric hydrogenation
Source: Royal Society of Chemistry journal article supplement (doi:10.1039/d4sc04222k), 2024-01-01

## ***Supporting Information***

# **Highly Enantioselective Synthesis of Both Enantiomers of Tetrahydroquinoxaline Derivatives via Ir-catalyzed Asymmetric Hydrogenation**

Ana Xu,<sup>a</sup> Lanxing Ren,<sup>a,e</sup> Junrong Huang,<sup>a</sup> Yuxiang Zhu,<sup>d</sup> Gang Wang,<sup>a</sup> Chaoyi Li,<sup>a</sup> Yongqiang Sun,<sup>a</sup> Lijuan Song,<sup>a\*</sup> Hengzhi You,<sup>a,b\*</sup> Fen-Er Chen<sup>a,b,c\*</sup>

<sup>a</sup>School of Science, Harbin Institute of Technology (Shenzhen), Shenzhen, 518055, China;

<sup>b</sup> Green Pharmaceutical Engineering Research Center, Harbin Institute of Technology (Shenzhen), Shenzhen, 518055, China; <sup>c</sup> Engineering Center of Catalysis and Synthesis for Chiral Molecules, Department of Chemistry, Fudan University, Shanghai, 200433, China;

<sup>d</sup>School of Pharmaceutical Sciences (Shenzhen), Shenzhen Campus of Sun Yat-sen University, Shenzhen, 518107, China; <sup>e</sup> School of Chemistry and Chemical Engineering, Hunan Province Key Laboratory for the Design and Application of Actinide Complexes, University of South China, Hengyang City, Hunan Province, 421001, P.R. China.

\* Corresponding authors

[songlijuan@hit.edu.cn](mailto:songlijuan@hit.edu.cn); [youthengzhi@hit.edu.cn](mailto:youthengzhi@hit.edu.cn); [rfchen@fudan.edu.cn](mailto:rfchen@fudan.edu.cn);

# Table of contents

|                                                                                                                           |    |
|---------------------------------------------------------------------------------------------------------------------------|----|
| 1. General remarks.....                                                                                                   | 1  |
| 2. General procedure for the synthesis of di-substituted quinoxaline substrates.....                                      | 1  |
| 3. General procedure for the synthesis of ( <i>R</i> )- tetrahydroquinoxaline derivatives via one pot<br>1                |    |
| 4. General procedure for the synthesis of ( <i>S</i> )- tetrahydroquinoxaline derivatives via one pot<br>2                |    |
| 5. General procedure for the asymmetric hydrogenation of di-substituted quinoxaline<br>derivatives .....                  | 2  |
| 6. Result of deuterium labeling experiments .....                                                                         | 3  |
| 7. General procedure for asymmetric hydrogenation under continuous flow .....                                             | 5  |
| 8. Optimization of reaction conditions for Ir-Catalyzed asymmetric hydrogenation of di-<br>substituted quinoxalines ..... | 8  |
| 9. Studies of the effect of ethanol.....                                                                                  | 9  |
| 10. Characterization data of chiral Tetrahydroquinoxalines and Dihydroquinoxalinones ....                                 | 10 |
| 10. Supporting references.....                                                                                            | 46 |
| 11. DFT computational studies.....                                                                                        | 47 |
| 11.1 Distortion calculation .....                                                                                         | 47 |
| 11.2 Method for DFT calculation.....                                                                                      | 48 |
| 11.3 Cartesian coordinates.....                                                                                           | 50 |
| 12. Supporting references for DFT calculation .....                                                                       | 98 |
| 13. NMR spectra.....                                                                                                      | 99 |

## 1. General remarks

All the reactions dealing with air- or moisture-sensitive compounds were carried out in a dry reaction vessel under a positive pressure of argon or in the argon-filled glovebox.  $^1\text{H}$  NMR and  $^{13}\text{C}$  NMR spectra were recorded using Q. One Instruments Quantum-I 400M spectrometer.  $^1\text{H}$  NMR and  $^{13}\text{C}$  NMR chemical shifts were reported in parts per million (ppm) downfield from tetramethylsilane. Coupling constants ( $J$ ) are reported in Hertz (Hz). The residual solvent peak was used as an internal reference:  $^1\text{H}$  NMR (chloroform  $\delta$  7.26) and  $^{13}\text{C}$  NMR (chloroform  $\delta$  77.0). The following abbreviations were used to explain the multiplicities: s = singlet, d = doublet, t = triplet, q = quartet, m = multiplet, br = broad. HRMS were obtained on Waters Xevo G2-XS QToF. All *substrates* were prepared according to the published procedures. Other reagents were received from commercial sources. Solvents were freshly dried and degassed according to the published procedures prior to use. Column chromatography purifications were performed by flash chromatography using Merck silica gel 60. Enantioselectivities were measured by HPLC (Thermo Ultimate 3000).

## 2. General procedure for the synthesis of di-substituted quinoxaline substrates

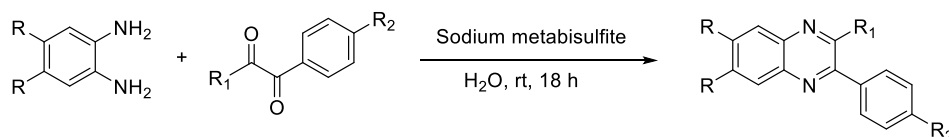

Sodium metabisulfite (6 mmol) was added to a solution of pyruvaldehyde (2.4 mmol) in water, then, 1,2-phenylenediamine (2 mmol) was added and the solution was stirred at room temperature. After 18 h the solution was adjusted to pH 10 by the addition of sodium carbonate ( $\text{Na}_2\text{CO}_3$ ), the mixture was extracted with ether ( $3 \times 30$  mL). The organic phase was dried over magnesium sulfate ( $\text{MgSO}_4$ ), filtered, and concentrated under reduced pressure.

## 3. General procedure for the synthesis of (R)-tetrahydroquinoxaline derivatives via one pot

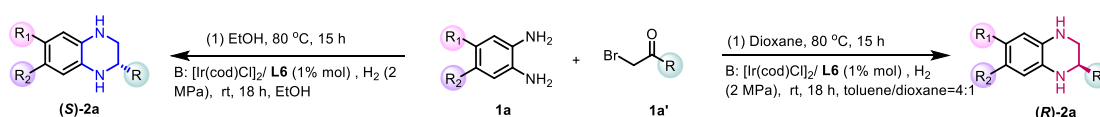

To a solution of benzene-1,2-diamine **1a** (27 mg, 0.25 mmol) in dioxane (1 mL) was added 2-bromo-1-phenylethan-1-one **1a'** (50 mg, 0.25 mmol) in a 10 mL schlenk tube at room temperature. Then the reaction mixture was stirred at 80 °C for 15 h. After the completion (as indicated by TLC), the mixture was cooled to room temperature. Next,

this mixture was delivered to a nitrogen-filled glovebox, and anhydrous toluene (4 mL) was added. This mixture will be proceeded a simple purification by a silicone column made from glass-tipped droppers and the organic layer (substrate) was collected. The solution of  $[\text{Ir}(\text{cod})\text{Cl}]_2$  (3.4 mg, 0.005 mmol) and ligand (9.8 mg, 0.011 mmol) in 2.0 mL anhydrous toluene was stirred at room temperature for 2 h. 500  $\mu\text{L}$  of the resulting solution was transferred by syringe into a vial charged with substrate. The vials were transferred to an autoclave, which were then charged with 2 MPa of  $\text{H}_2$  and stirred at room temperature for 18 h. After release of  $\text{H}_2$ , the resulting mixture was concentrated under vacuum. The residue was purified by column chromatography to give the product (*R*)-**2a**. The enantiomeric excess was determined by HPLC analysis of the crude product. The other (*R*)- tetrahydroquinoxaline derivatives were prepared with the same procedure.

#### 4. General procedure for the synthesis of (*S*)-tetrahydroquinoxaline derivatives via one pot

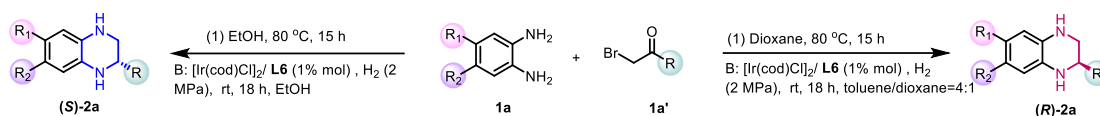

To a solution of benzene-1,2-diamine **1a** (27 mg, 0.25 mmol) in EtOH (1 mL) was added 2-bromo-1-phenylethan-1-one **1a'** (50 mg, 0.25 mmol) in a 10 mL schlenk tube at room temperature. Then the reaction mixture was stirred at 80 °C for 15 h. After the completion (as indicated by TLC), the mixture was cooled to room temperature. The solvent was removed under reduced pressure and the residue (substrate) was purified by a silicone column made from glass-tipped droppers. Next, this substrate was delivered to a nitrogen-filled glovebox, and anhydrous EtOH (4 mL) was added. The solution of  $[\text{Ir}(\text{cod})\text{Cl}]_2$  (3.4 mg, 0.005 mmol) and ligand (9.8 mg, 0.011 mmol) in 2.0 mL anhydrous EtOH was stirred at room temperature for 30 min. 500  $\mu\text{L}$  of the resulting solution was transferred by syringe into a vial charged with substrate. The vials were transferred to an autoclave, which were then charged with 2 MPa of  $\text{H}_2$  and stirred at room temperature for 18 h. After release of  $\text{H}_2$ , the resulting mixture was concentrated under vacuum. The residue was purified by column chromatography to give the product (*S*)-**2a**. The enantiomeric excess was determined by HPLC analysis of the crude product. The other (*S*)- tetrahydroquinoxaline derivatives were prepared with the same procedure.

#### 5. General procedure for the asymmetric hydrogenation of di-substituted quinoxaline derivatives

In the nitrogen-filled glovebox, solution of  $[\text{Ir}(\text{cod})\text{Cl}]_2$  (3.4 mg, 0.005 mmol) and ligand (9.8 mg, 0.011 mmol) in 2.0 mL anhydrous solvent was stirred at room temperature for 2 h. 500  $\mu\text{L}$  of the resulting solution was transferred by syringe to a Score-Break ampule charged with substrate (0.25 mmol) and (*R*)-4-



hydroxydinaphtho[2,1-d:1',2'-f][1,3,2]dioxaphosphepine 4-oxide ((*R*)-CPA) (0.5 mmol) solution. The ampule was placed into an autoclave, which was then charged with 2 MPa H<sub>2</sub>. The autoclave was stirred at room temperature for the indicated period of time. After release of H<sub>2</sub>, the resulting mixture was concentrated under vacuum. The residue was purified by column chromatography to give the product. The enantiomeric excess was determined by HPLC analysis of the crude product.

## 6. Result of deuterium labeling experiments

Following standard hydrogenation procedure, deuterium labeling experiments were conducted with specific modification.

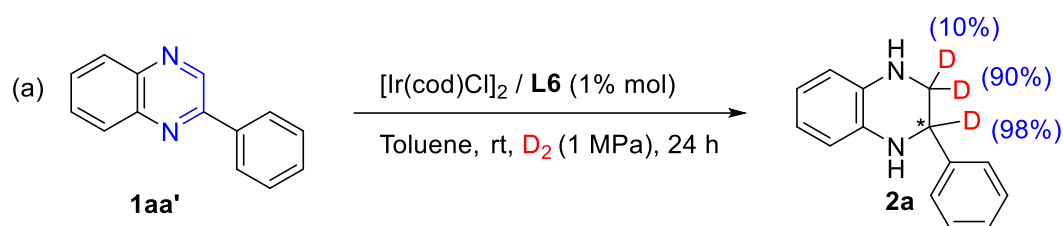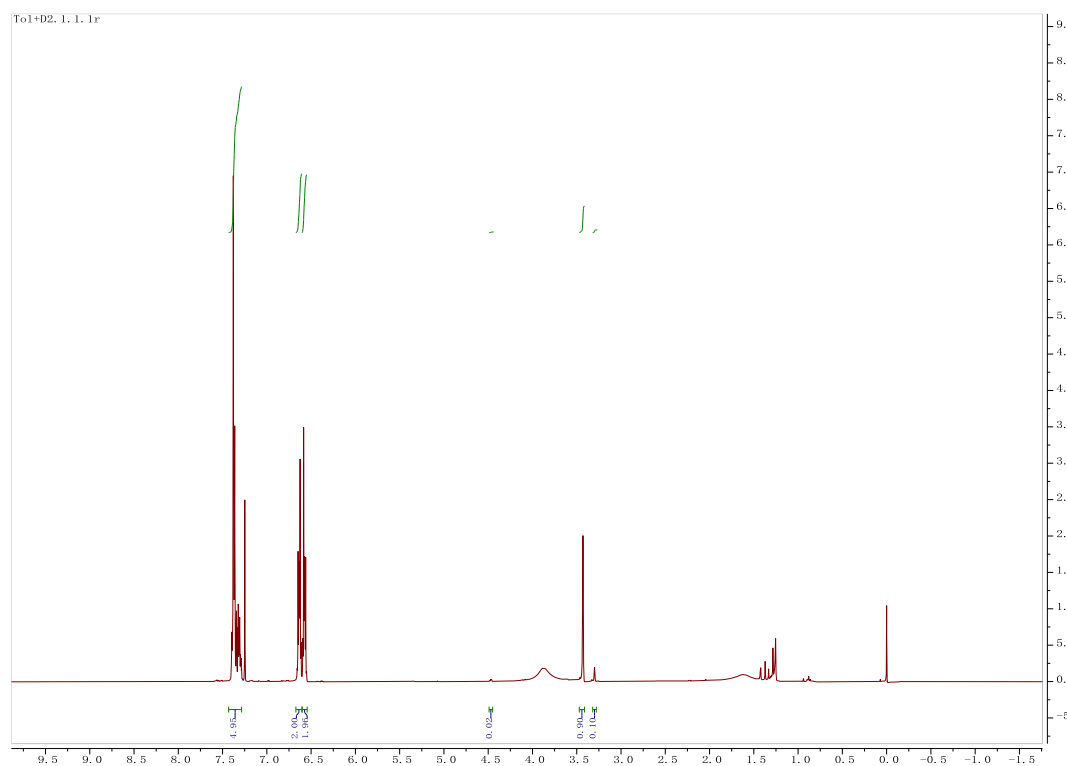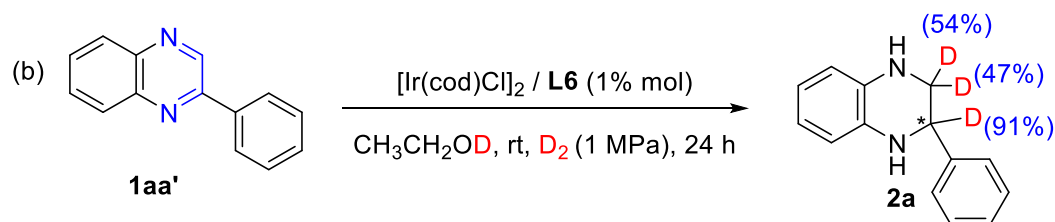

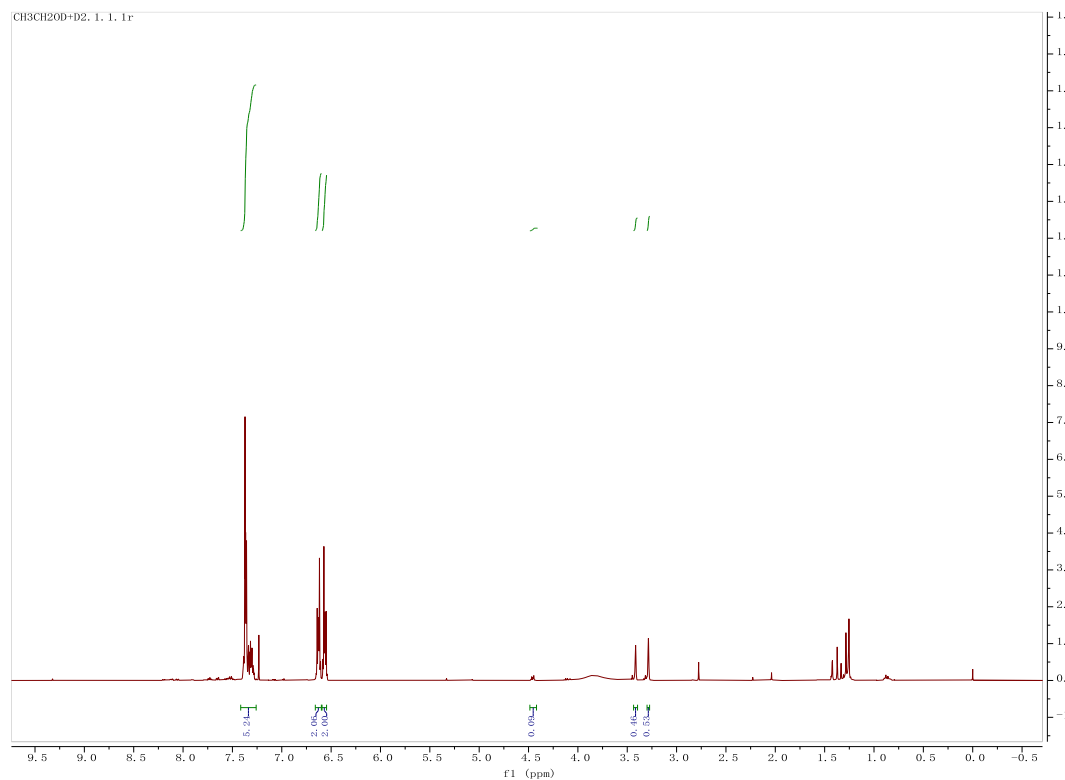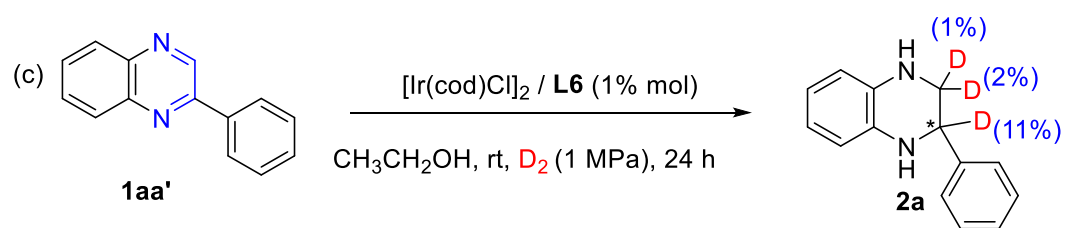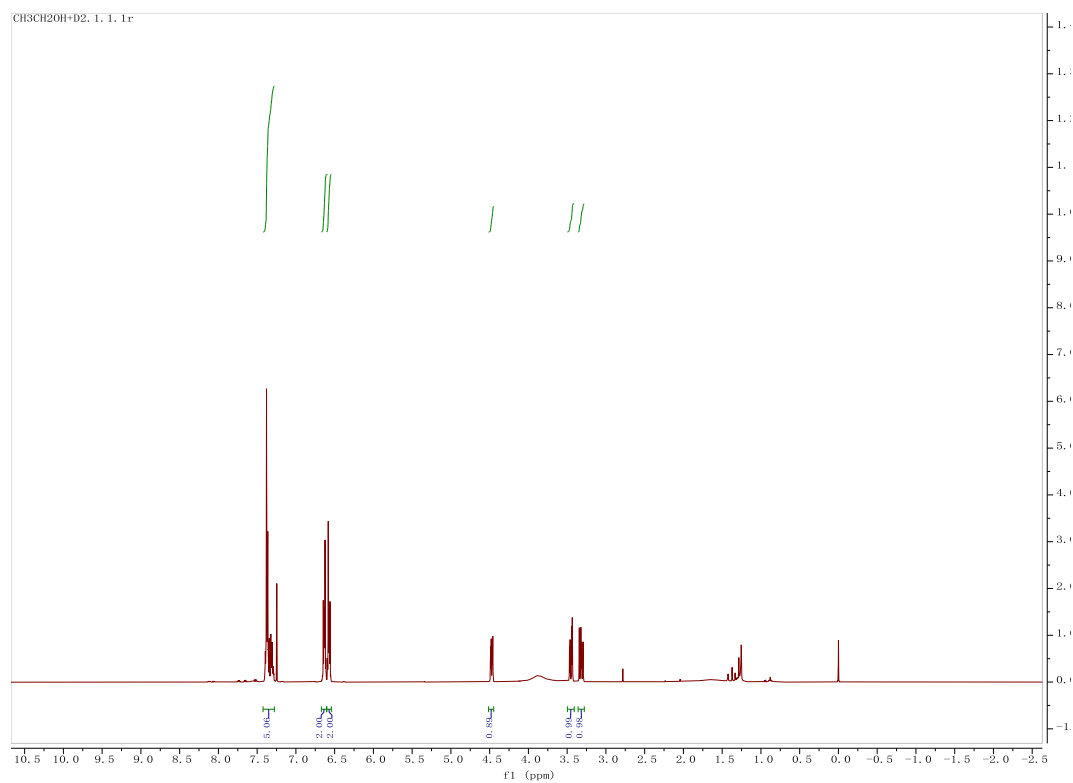

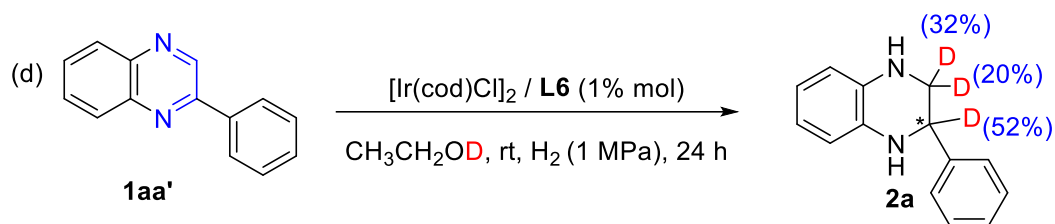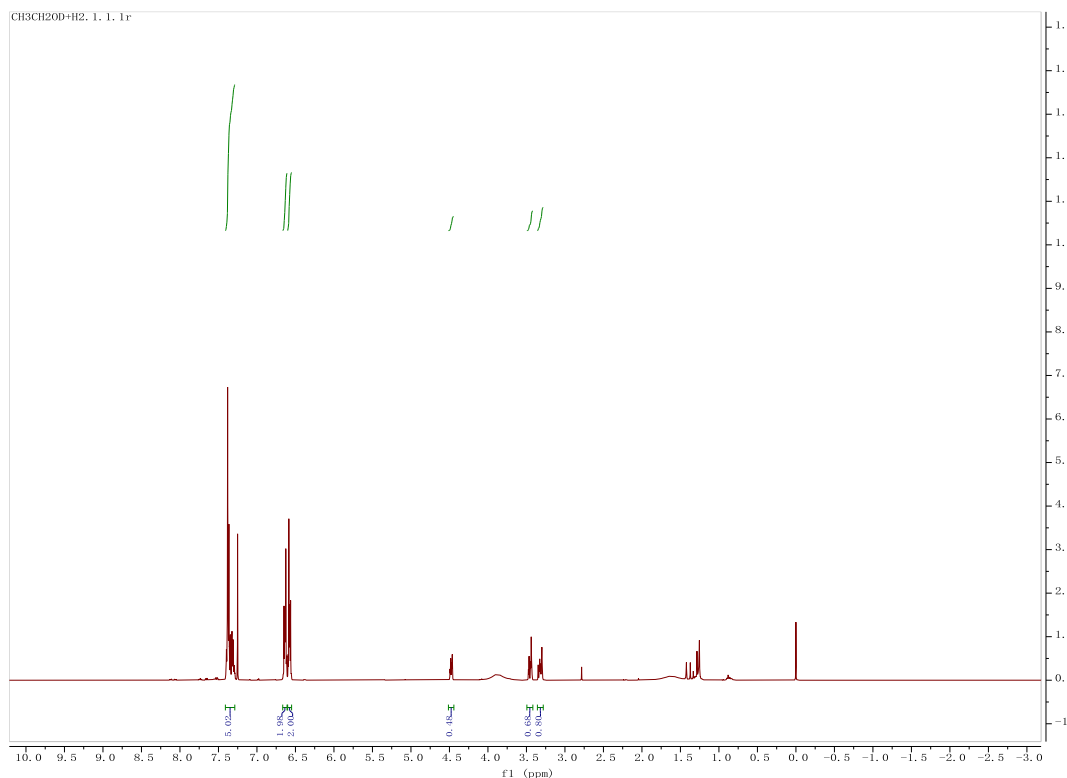

## 7. General procedure for asymmetric hydrogenation under continuous flow

All process parts, including fittings, tubes, valves and junctions that hold pressure were purchased from Shenzhen Yizheng Technology Co., LTD. The specification of the reaction coil is 0.5 mL/m. The information of other main components is summarized in Table S1.

**Table S1** Components details of reactor system

| Name                 | Information                                                   |
|----------------------|---------------------------------------------------------------|
| Pump                 | Sanotac high pressure HPLC pump AP0030 (0-10 mL/min; 100 bar) |
| MFC                  | Beijing sevenstar flow CO. LTD, D08-1F, (0-100 sccm, 150 bar) |
| Relief check         | X-tec Proportional ReliefValves RV-K2F (1000-1500 psi)        |
| BPR                  | X-tec General-Purpose Back-PressureRegulators RBG (1000 psi)  |
| Gas liquid separator | Shenzhen yizheng technology CO. LTD, (100 mL, 1000 psi)       |
| Mixer                | Shenzhen yizheng technology CO. LTD, (0.6 mL, 1000 psi)       |

In the nitrogen-filled glovebox, solution of  $[\text{Ir}(\text{cod})\text{Cl}]_2$  (49.5 mg, 0.073 mmol) and ligand (143.1 mg, 0.16 mmol) in 5.0 mL anhydrous EtOH was stirred at room temperature for 1 h. Then the substrate **1aa'** (3 g, 14.6 mmol) was dissolved in 292 mL anhydrous EtOH and mixed with the above solution. The resulting mixture was filtered and the filtrate was added into a flask. The process was washed by anhydrous EtOH at a liquid flow rate of 5 mL/min and gas flow rate of 10 sccm (avoid back flow of liquid to gas flow meter) for 10 minutes and then pressurized the BPR. After the reactor was pressurized to 3 MPa, the beforehand reaction medium was pumped instead of solvent. Liquid flow rate was set at 0.2 mL/min and gas flow rate was 8 sccm. The liquid holding capacity of the reaction coil can be adjusted according to the needs. The crude product (**S**)-2a could be collected in gas-liquid separator. Conversion and *ee* value were analyzed by NMR and HPLC. When reaction finished, system was depressurized by releasing the gas of Equilibar BPR slowly, and washed the whole system by pumping EtOH for 10 minutes.

In the nitrogen-filled glovebox, solution of  $[\text{Ir}(\text{cod})\text{Cl}]_2$  (49.5 mg, 0.073 mmol) and ligand (143.1 mg, 0.16 mmol) in 5.0 mL anhydrous dioxane was stirred at room temperature for 2 h. Then the substrate **1aa'** (3 g, 14.6 mmol) and HCl (0.365 mmol) were dissolved in 292 mL anhydrous dioxane and mixed with the above solution. The resulting mixture was filtered and the filtrate was added into a flask. This process was washed by anhydrous dioxane at a liquid flow rate of 5 mL/min and gas flow rate of 10 sccm (avoid back flow of liquid to gas flow meter) for 10 minutes and then pressurized the BPR. After the reactor was pressurized to 3 MPa, the beforehand reaction medium was pumped instead of solvent. Liquid flow rate was set at 0.1 mL/min and gas flow rate was 6 sccm. The liquid holding capacity of the reaction coil can be adjusted according to the needs. The crude product (**R**)-2a could be collected in gas-liquid separator. Conversion and *ee* value were analyzed by NMR and HPLC. When reaction finished, system was depressurized by releasing the gas of Equilibar BPR slowly, and washed the whole system by pumping EtOH for 10 minutes.

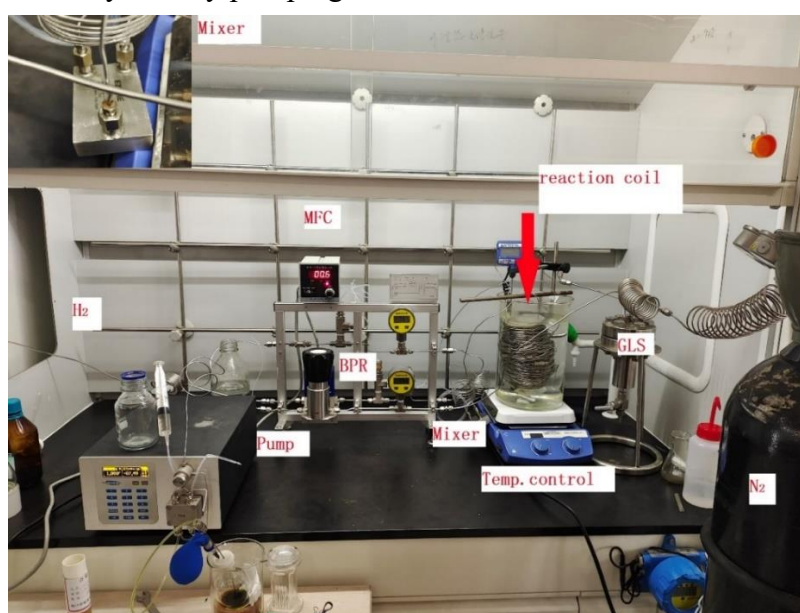

**Figure S1.** Set-up for asymmetric hydrogenation under continuous flow.

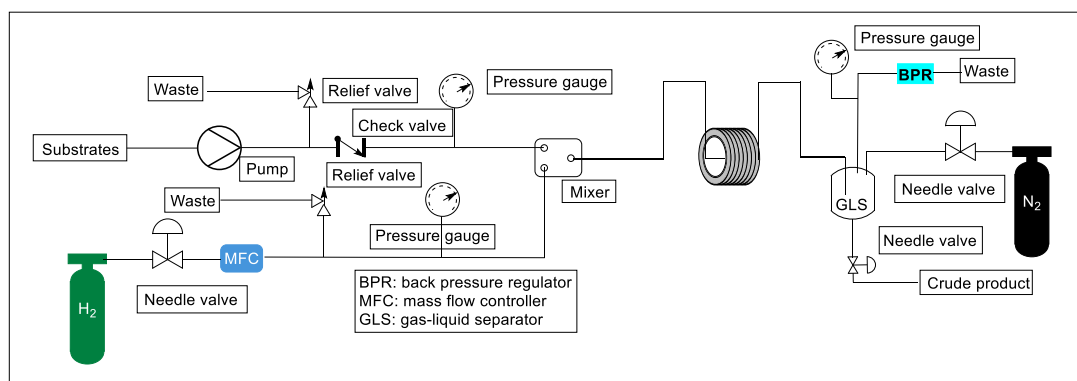

**Scheme S1.** Process scheme of **3j** under continuous flow.

**Table S2.** The optimization of **1aa'** under continuous flow

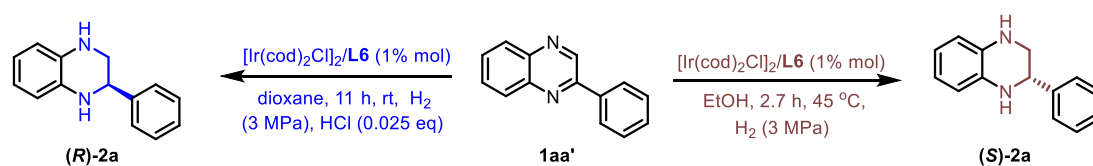

| <i>Conc</i><br>(M)         | Gas<br>(sccm) | Solvent        | Liquid<br>(mL/min) | H <sub>2</sub><br>(MPa) | RetTime<br>(min) | <i>Conv</i><br>(%) <sup>a</sup> | <i>ee</i><br>(%) <sup>b</sup> |
|----------------------------|---------------|----------------|--------------------|-------------------------|------------------|---------------------------------|-------------------------------|
| 0.05                       | 10            | EtOH           | 1                  | 2                       | 35               | 12                              | --                            |
| 0.05                       | 7             | EtOH           | 0.5                | 2                       | 58               | 13                              |                               |
| 0.075                      | 10            | EtOH           | 0.5                | 3                       | 46               | 12                              |                               |
| 0.075                      | 10            | Tol/Di=2:1     | 0.5                | 3                       | 46               | 0                               |                               |
| 0.075                      | 10            | Dioxane        | 0.3                | 3                       | 53               | 10                              |                               |
| 0.05                       | 10            | EtOH           | 0.5                | 2.5                     | 66               | 10                              |                               |
| 0.05                       | 15            | EtOH           | 0.3                | 2.5                     | 55               | 22                              |                               |
| 0.05                       | 18            | EtOH           | 0.2                | 3                       | 50               | 35 <sup>c</sup>                 |                               |
| 0.05                       | 10            | EtOH           | 0.2                | 3                       | 125              | 64                              |                               |
| 0.05                       | 10            | EtOH           | 0.2                | 3                       | 125              | 89 <sup>c</sup>                 | 87(S)                         |
| <b>0.05</b>                | <b>8</b>      | <b>EtOH</b>    | <b>0.2</b>         | <b>3</b>                | <b>162</b>       | <b>91<sup>c</sup></b>           | <b>87(S)</b>                  |
| 0.05                       | 8             | Dio/tol=4:1    | 0.2                | 3                       | 162              | 11 <sup>c</sup>                 |                               |
| 0.05                       | 8             | Dioxane        | 0.2                | 3                       | 162              | 14 <sup>c</sup>                 |                               |
| 0.05                       | 8             | Dioxane        | 0.2                | 3                       | 240              | 16 <sup>c</sup>                 |                               |
| 0.05                       | 8             | Dioxane        | 0.2                | 3                       | 390              | 15 <sup>c</sup>                 |                               |
| 0.05 (0.1 eq HCl)          | 8             | Dioxane        | 0.2                | 3                       | 390              | 92 <sup>c</sup>                 | 73(R)                         |
| 0.05 (0.05 eq HCl)         | 8             | Dioxane        | 0.2                | 3                       | 390              | 92                              | 87(R)                         |
| 0.05 (0.035 eq HCl)        | 9             | Dioxane        | 0.2                | 3                       | 390              | 93                              | 89(R)                         |
| 0.05 (0.035 eq HCl)        | 9             | Dioxane        | 0.2                | 3                       | 390              | 93                              | 89(R)                         |
| 0.05 (0.025 eq HCl)        | 9             | Dioxane        | 0.2                | 3                       | 390              | 66                              | 90(R)                         |
| <b>0.05 (0.025 eq HCl)</b> | <b>6</b>      | <b>Dioxane</b> | <b>0.1</b>         | <b>3</b>                | <b>660</b>       | <b>92</b>                       | <b>93(R)</b>                  |
| 0.05 (0.03 eq HCl)         | 6             | Dioxane        | 0.1                | 3                       | 660              | 94                              | 90(R)                         |

a. conversion was determined by <sup>1</sup>HNMR. b. *ee* were determined by HPLC. c. The reaction temperature was 45 °C.

## 8. Optimization of reaction conditions for Ir-Catalyzed asymmetric hydrogenation of di-substituted quinoxalines

Table S3. The optimization of reaction conditions for di-substituted quinoxalines

Reaction scheme: **3a**  $\xrightarrow[\text{solvent, rt, 24 h, H}_2 \text{ (2 MPa)}]{[\text{Ir}(\text{cod})\text{Cl}]_2, \text{L6, (1 mol \%)}}$  **4a**

---

Additives:

**1**

**CPA**

**3: Ar=2,4,6-(<sup>i</sup>Pr)<sub>3</sub>-Ph**

**4**

---

| Entry | Solvent | Additive                            | (x)eq | Conv. | Cis/trans | <i>ee</i> (%) of <i>trans</i> | <i>ee</i> (%) of <i>cis</i>   |
|-------|---------|-------------------------------------|-------|-------|-----------|-------------------------------|-------------------------------|
| 1     | EtOH    | -                                   | --    | 20    | >25:1     | --                            | 81 (2 <i>R</i> , 3 <i>S</i> ) |
| 2     | toluene | -                                   | --    | 99    | 1.5: 1    | 99 (2 <i>S</i> , 3 <i>S</i> ) | 41 (2 <i>R</i> , 3 <i>S</i> ) |
| 3     | toluene | KOC(CH <sub>3</sub> ) <sub>3</sub>  | 0.2   | 0     | --        | --                            | --                            |
| 4     | toluene | CH <sub>3</sub> CH <sub>2</sub> ONa | 0.2   | 0     | --        | --                            | --                            |
| 5     | toluene | CH <sub>3</sub> COOH                | 0.2   | 99    | 1.5: 1    | 99 (2 <i>S</i> , 3 <i>S</i> ) | 36 (2 <i>R</i> , 3 <i>S</i> ) |
| 6     | EtOH    | CH <sub>3</sub> COONa               | 0.2   | 0     | --        | --                            | --                            |
| 7     | EtOH    | CH <sub>3</sub> COOH                | 0.2   | 0     | --        | --                            | --                            |
| 8     | Dioxane | HCl                                 | 0.2   | 99    | 7:93      | 99 (2 <i>S</i> , 3 <i>S</i> ) | 29 (2 <i>R</i> , 3 <i>S</i> ) |
| 9     | toluene | KCl                                 | 0.2   | 99    | 1.6:1     | 99 (2 <i>S</i> , 3 <i>S</i> ) | 47 (2 <i>R</i> , 3 <i>S</i> ) |
| 10    | toluene | NaCl                                | 0.2   | 99    | 1.6:1     | 99 (2 <i>S</i> , 3 <i>S</i> ) | 48 (2 <i>R</i> , 3 <i>S</i> ) |
| 11    | toluene | L-CSA                               | 1.5   | 99    | >20:1     | --                            | 71 (2 <i>R</i> , 3 <i>S</i> ) |
| 12    | toluene | In(OTf) <sub>3</sub>                | 0.2   | 0     | --        | --                            | --                            |
| 13    | toluene | HCOOH                               | 0.2   | 99    | 1:1       | 99 (2 <i>S</i> , 3 <i>S</i> ) | 31 (2 <i>R</i> , 3 <i>S</i> ) |
| 14    | dioxane | L-CSA                               | 1.5   | 99    | >20:1     | --                            | 35 (2 <i>R</i> , 3 <i>S</i> ) |
| 15    | THF     | L-CSA                               | 1.5   | 99    | >20:1     | --                            | 67 (2 <i>R</i> , 3 <i>S</i> ) |
| 16    | toluene | 1                                   | 1.5   | 99    | >20:1     | --                            | 76 (2 <i>R</i> , 3 <i>S</i> ) |
| 17    | toluene | 2                                   | 1.5   | 99    | >20:1     | --                            | 87 (2 <i>R</i> , 3 <i>S</i> ) |
| 18    | toluene | 3                                   | 1.5   | 56    | >20:1     | --                            | 75 (2 <i>R</i> , 3 <i>S</i> ) |
| 19    | toluene | 4                                   | 1.5   | 92    | 1.5:1     | 97 (2 <i>S</i> , 3 <i>S</i> ) | 67 (2 <i>R</i> , 3 <i>S</i> ) |
| 20    | toluene | ( <i>R</i> )-CPA                    | 2     | 99    | >20:1     | --                            | 91 (2 <i>R</i> , 3 <i>S</i> ) |
| 21    | toluene | ( <i>S</i> )-CPA                    | 2     | 99    | >20:1     | --                            | 80 (2 <i>S</i> , 3 <i>R</i> ) |

Reaction conditions: 0.25 mmol substrate **3a**, 1.0 mol % [Ir (COD)Cl]<sub>2</sub>/L6, H<sub>2</sub> (2 MPa), 2.0 mL solvent, rt, additives, and 24 h. Conversion and *Cis/trans* were determined by <sup>1</sup>H NMR. *ee* value was determined by HPLC.

## 9. Studies of the effect of ethanol

In the nitrogen-filled glovebox, solution of  $[\text{Ir}(\text{cod})\text{Cl}]_2$  (3.4 mg, 0.005 mmol) and ligand (9.8 mg, 0.011 mmol) in 2.0 mL anhydrous toluene was stirred at room temperature for 2 h (30 min in EtOH solvent for entries 9-11). 500  $\mu\text{L}$  of the resulting solution was transferred by syringe to a Score-Break ampule charged with substrate (0.25 mmol). And then a relevant amount of ethanol solvent was added and the total volume of solvent was 3 mL. The ampule was placed into an autoclave, which was then charged with 2 MPa  $\text{H}_2$ . The autoclave was stirred at room temperature for the indicated period of time. After release of  $\text{H}_2$ , the resulting mixture was concentrated under vacuum. The residue was purified by column chromatography to give the product. The enantiomeric excess was determined by HPLC analysis of the crude product.

Table S4. Studies of the effect of ethanol for toluene/dioxane catalytic system.

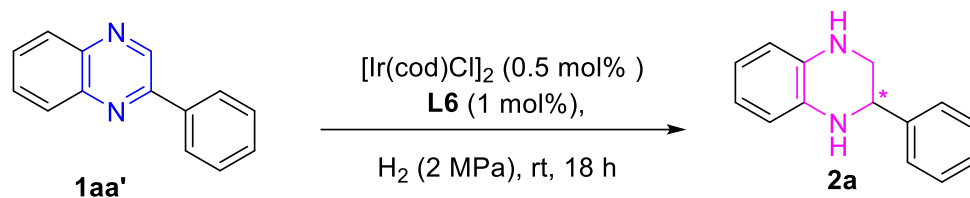

| Entry | Solvent               | Conv. (%) | <i>ee</i> (%)   |
|-------|-----------------------|-----------|-----------------|
| 1     | Toluene               | 99        | 97 ( <i>R</i> ) |
| 2     | EtOH                  | 99        | 89 ( <i>S</i> ) |
| 3     | Toluene (0.2 eq EtOH) | 99        | 94 ( <i>R</i> ) |
| 4     | Toluene (1 eq EtOH)   | 99        | 94 ( <i>R</i> ) |
| 5     | Toluene: EtOH=20:1    | 99        | 91 ( <i>R</i> ) |
| 6     | Toluene: EtOH=10:1    | 99        | 79 ( <i>R</i> ) |
| 7     | Toluene: EtOH=5:1     | 99        | 56 ( <i>R</i> ) |
| 8     | Toluene: EtOH=1:1     | 99        | 70 ( <i>S</i> ) |
| 9     | EtOH: Toluene=5:1     | 99        | 88 ( <i>S</i> ) |
| 10    | EtOH: Toluene=10:1    | 99        | 90 ( <i>S</i> ) |
| 11    | EtOH: Toluene=20:1    | 99        | 88 ( <i>S</i> ) |

Reaction conditions: 0.25 mmol substrate **1aa'**, 1.0 mol %  $[\text{Ir}(\text{COD})\text{Cl}]_2/\text{L6}$ ,  $\text{H}_2$  (2 MPa), 2.0 mL solvent, rt, and 18 h. Conversion were determined by  $^1\text{H}$  NMR. *ee* value was determined by HPLC.

## 10. Characterization data of chiral Tetrahydroquinoxalines and Dihydroquinoxalinones

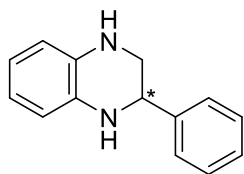

### (*R/S*)-2-phenyl-1,2,3,4-tetrahydroquinoxaline (**2a**)<sup>1</sup>

Yellow solid. <sup>1</sup>H NMR (400 MHz, Chloroform-d) δ 7.48 – 7.30 (m, 5H), 6.73 – 6.66 (m, 2H), 6.66 – 6.60 (m, 2H), 4.53 (dd, *J* = 8.2, 3.1 Hz, 1H), 3.51 (dd, *J* = 11.1, 3.1 Hz, 1H), 3.37 (dd, *J* = 11.0, 8.2 Hz, 1H). <sup>13</sup>C NMR (101 MHz, Chloroform-d) δ 141.92, 134.22, 132.89, 128.74, 127.99, 127.09, 119.00, 118.87, 114.81, 114.52, 54.79, 49.22.

$[\alpha]_D^{25} = -94.733$  (c 0.1, CHCl<sub>3</sub>) for (*R*)-**2a**.  $[\alpha]_D^{25} = 86.044$  (c 0.1, CHCl<sub>3</sub>) for (*S*)-**2a**.

HRMS (ESI) calcd for C<sub>14</sub>H<sub>14</sub>N<sub>2</sub><sup>+</sup> [(M+H)<sup>+</sup>] 211.1230, found 211.1231.

Daicel Chiralpak OD-H column, isocratic elution: n-hexane/2-propanol 90:10, flow rate 1 mL/min, column temp 40 °C, retention times 16.480 min (major enantiomer), 23.500 min (minor enantiomer), 97% *ee* for (*R*)-**2a**, retention times 17.133 min (minor enantiomer), 23.633 min (major enantiomer), 89% *ee* for (*S*)-**2a**.

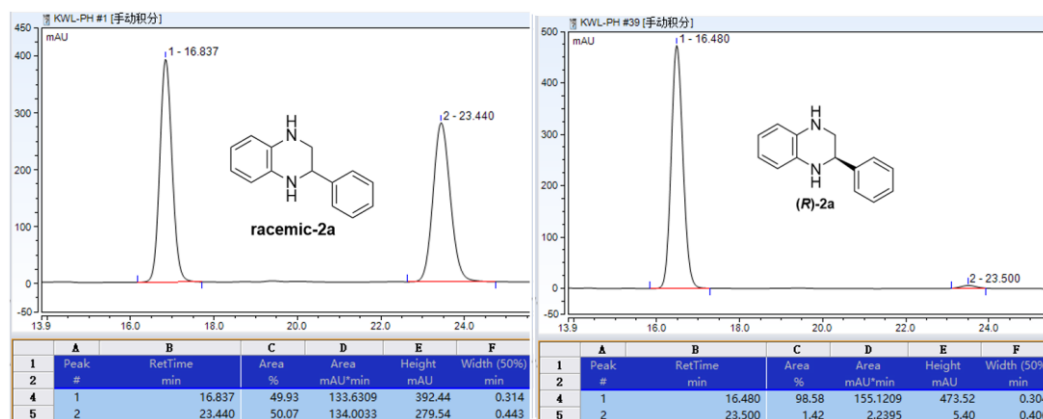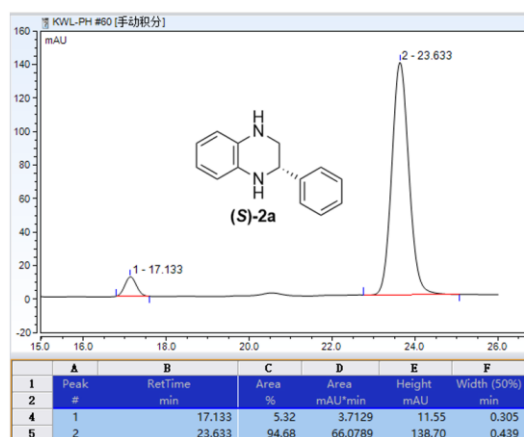



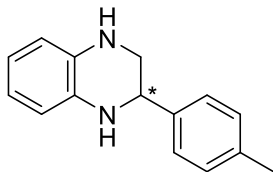

**(*R/S*)-2-(*p*-tolyl)-1,2,3,4-tetrahydroquinoxaline (**2b**)<sup>2</sup>**

Yellow solid. <sup>1</sup>H NMR (400 MHz, Chloroform-*d*) δ 7.31 (d, *J* = 8.0 Hz, 2H), 7.30 (s, 1H), 7.22 (d, *J* = 7.9 Hz, 2H), 6.72 – 6.57 (m, 4H), 4.49 (dd, *J* = 8.2, 3.1 Hz, 1H), 3.48 (dd, *J* = 11.0, 3.1 Hz, 1H), 3.35 (dd, *J* = 11.0, 8.2 Hz, 1H), 2.39 (s, 3H). <sup>13</sup>C NMR (101 MHz, Chloroform-*d*) δ 138.88, 134.27, 132.83, 129.39, 126.95, 118.98, 118.79, 114.77, 114.46, 54.49, 49.24, 21.20.

$[\alpha]_D^{25} = -97.074$  (*c* 0.1, CHCl<sub>3</sub>) for (***R***)-**2b**.  $[\alpha]_D^{25} = 66.370$  (*c* 0.1, CHCl<sub>3</sub>) for (***S***)-**2b**.

HRMS (ESI) calcd for C<sub>15</sub>H<sub>17</sub>N<sub>2</sub><sup>+</sup> [(*M*+*H*)<sup>+</sup>] 225.1386, found 225.1383.

Daicel Chiralpak OD-H column, isocratic elution: *n*-hexane/2-propanol 90:10, flow rate 1 mL/min, column temp 40 °C, retention times 14.090 min (major enantiomer), 20.857 min (minor enantiomer), 94% *ee* for (***R***)-**2b**, retention times 14.180 min (minor enantiomer), 20.770 min (major enantiomer), 93% *ee* for (***S***)-**2b**.

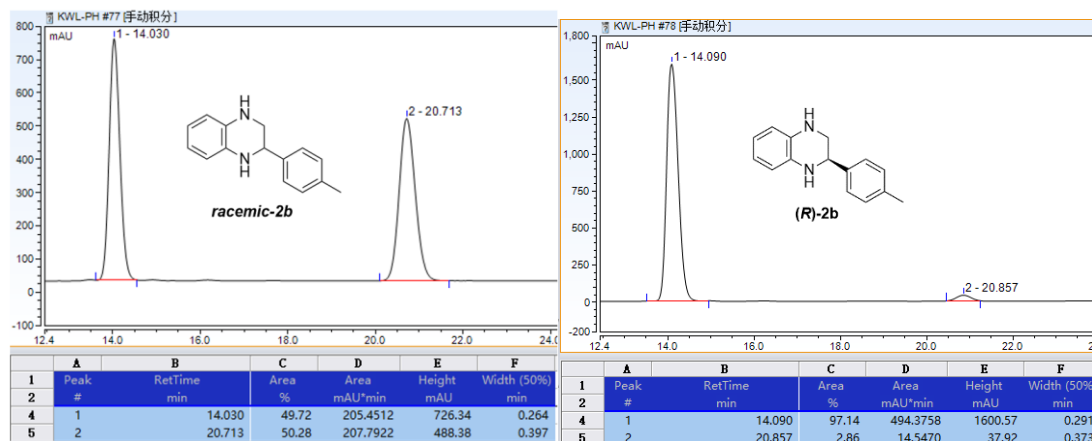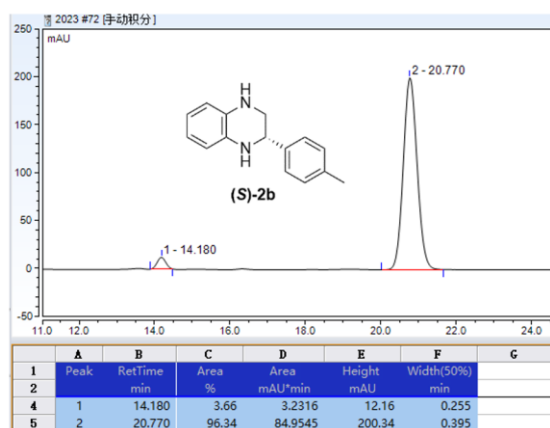

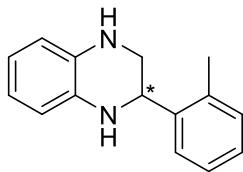

**(*R/S*)-2-(*o*-tolyl)-1,2,3,4-tetrahydroquinoxaline (**2c**)<sup>3</sup>**

Yellow solid. <sup>1</sup>H NMR (400 MHz, Chloroform-*d*) δ 7.51 (d, *J* = 7.4 Hz, 1H), 7.32 – 7.24 (m, 3H), 6.72 – 6.63 (m, 4H), 4.76 (m, 1H), 3.81 (s, 2H), 3.50 (d, *J* = 11.1 Hz, 1H), 3.32 (t, *J* = 9.7 Hz, 1H), 2.46 (s, 3H). <sup>13</sup>C NMR (101 MHz, Chloroform-*d*) δ 139.60, 135.33, 134.53, 132.87, 130.53, 127.56, 126.72, 126.60, 118.97, 118.85, 114.78, 114.60, 50.62, 47.86, 19.31.

$[\alpha]_D^{25} = -69.149$  (*c* 0.1, CHCl<sub>3</sub>) for (*R*)-**2c**.  $[\alpha]_D^{25} = 68.044$  (*c* 0.1, CHCl<sub>3</sub>) for (*S*)-**2c**.

HRMS (ESI) calcd for C<sub>15</sub>H<sub>16</sub>N<sub>2</sub><sup>+</sup> [(M+H)<sup>+</sup>] 224.1313, found 224.1312.

Daicel Chiralpak OD-H column, isocratic elution: n-hexane/2-propanol 90:10, flow rate 0.8 mL/min, column temp 40 °C, retention time 22.827 min (major enantiomer), 24.610 min (minor enantiomer), 97% *ee* for (*R*)-**2c**, retention time 21.777 min (minor enantiomer), 24.090 min (major enantiomer), 81% *ee* for (*S*)-**2c**.

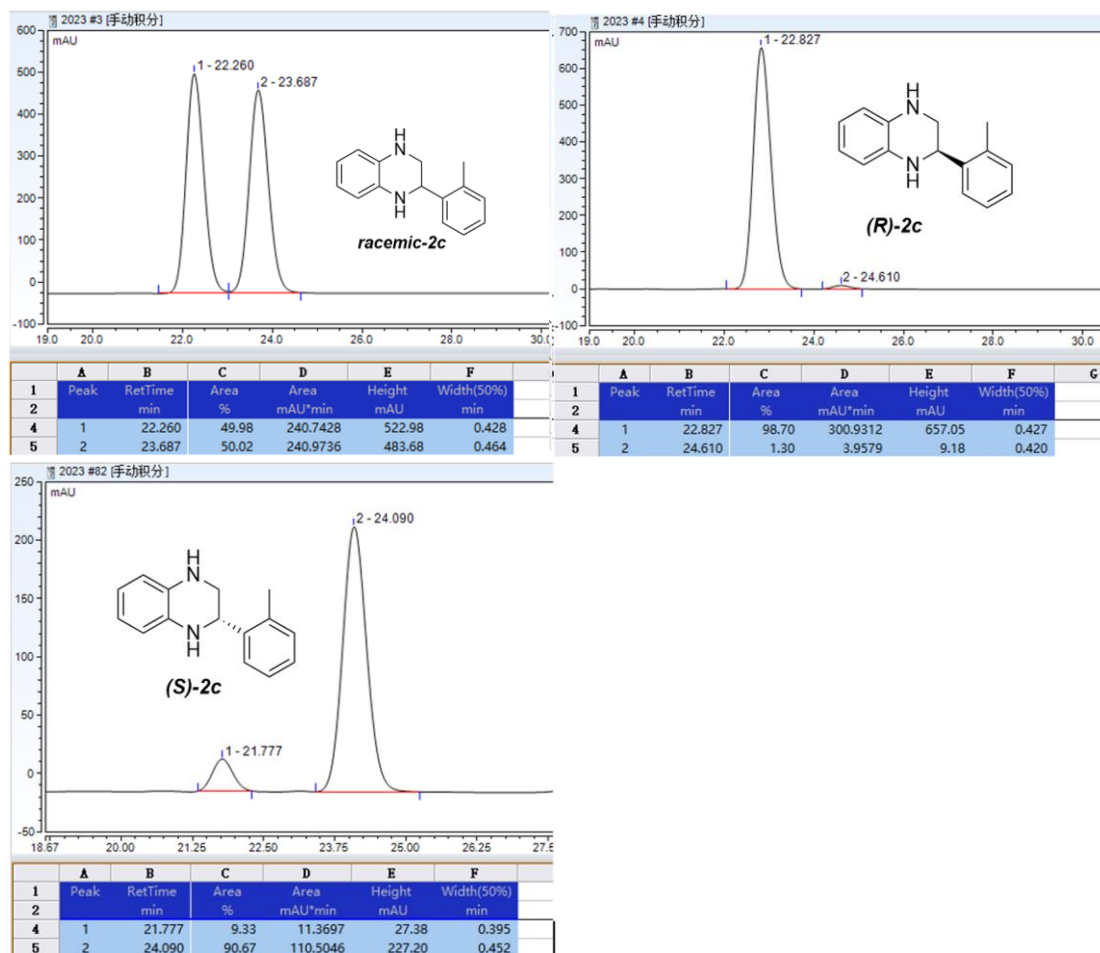

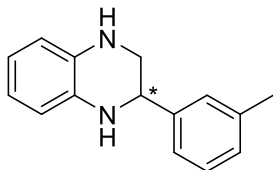

**(*R/S*)-2-(*m*-tolyl)-1,2,3,4-tetrahydroquinoxaline (**2d**)<sup>4</sup>**

Yellow solid. <sup>1</sup>H NMR (400 MHz, Chloroform-*d*) δ 7.29 – 7.22 (m, 1H), 7.22 – 7.16 (m, 2H), 7.13 (d, *J* = 7.5 Hz, 1H), 6.67 – 6.60 (m, 2H), 6.60 – 6.54 (m, 2H), 4.44 (dd, *J* = 8.4, 3.1 Hz, 1H), 3.84 (s, 2H), 3.44 (ddd, *J* = 11.0, 3.1, 1.1 Hz, 1H), 3.32 (ddd, *J* = 11.1, 8.3, 1.2 Hz, 1H), 2.36 (s, 3H). <sup>13</sup>C NMR (101 MHz, Chloroform-*d*) δ 141.78, 138.43, 134.24, 132.90, 128.72, 128.62, 127.73, 124.14, 118.95, 118.83, 114.76, 114.49, 54.77, 49.27, 21.53.

[α]<sub>D</sub><sup>25</sup> = -57.041 (*c* 0.1, CHCl<sub>3</sub>) for (*R*)-**2d**. [α]<sub>D</sub><sup>25</sup> = 66.768 (*c* 0.1, CHCl<sub>3</sub>) for (*S*)-**2d**.

HRMS (ESI) calcd for C<sub>15</sub>H<sub>16</sub>N<sub>2</sub><sup>+</sup> [(*M*+*H*)<sup>+</sup>] 224.1313, found 224.1316.

Daicel Chiralpak OD-H column, isocratic elution: *n*-hexane/2-propanol 90:10, flow rate 0.8 mL/min, column temp 40 °C, retention time 17.237 min (major enantiomer), 24.103 min (minor enantiomer), 97% *ee* for (*R*)-**2d**, retention time 16.820 min (minor enantiomer), 23.983 min (major enantiomer), 87% *ee* for (*S*)-**2d**.

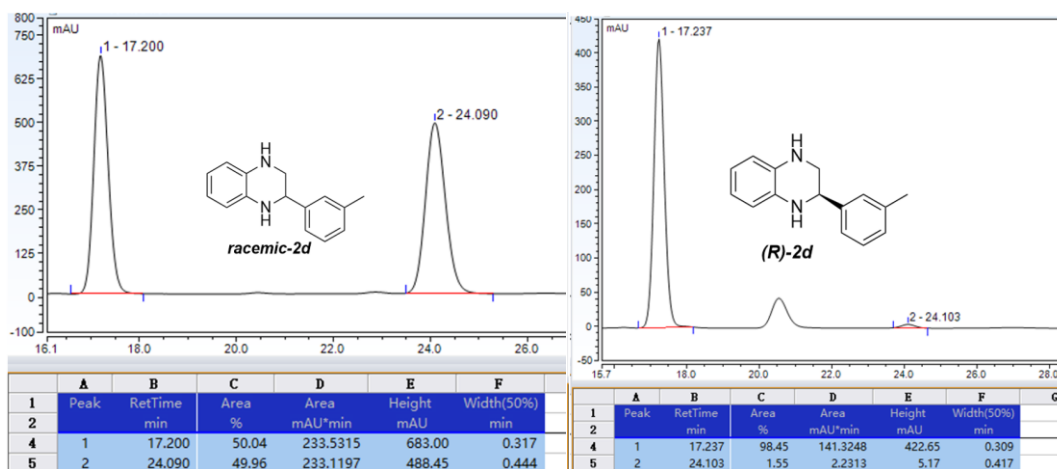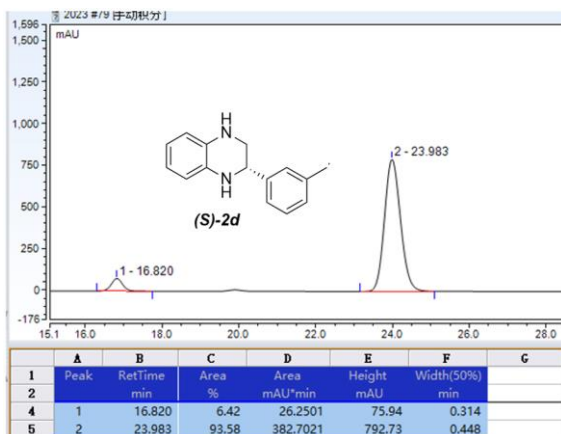

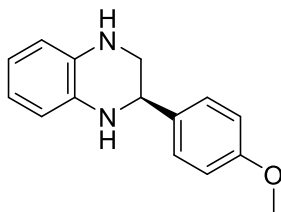

**(*R/S*)-2-(4-methoxyphenyl)-1,2,3,4-tetrahydroquinoxaline (2e)<sup>2</sup>**

Yellow solid. <sup>1</sup>H NMR (400 MHz, Chloroform-*d*) δ 7.30 (d, *J* = 8.2 Hz, 2H), 6.90 (d, *J* = 8.2 Hz, 2H), 6.63 (dd, *J* = 5.7, 3.6 Hz, 2H), 6.56 (dd, *J* = 6.2, 3.0 Hz, 2H), 4.42 (dd, *J* = 8.4, 3.1 Hz, 1H), 3.81 (s, 3H), 3.41 (dd, *J* = 11.0, 3.1 Hz, 1H), 3.29 (dd, *J* = 11.0, 8.3 Hz, 1H). <sup>13</sup>C NMR (101 MHz, Chloroform-*d*) δ 159.36, 134.27, 133.98, 132.90, 128.18, 118.91, 118.81, 114.72, 114.47, 114.08, 55.40, 54.16, 49.34.

[α]<sub>D</sub><sup>25</sup> = -76.372 (*c* 0.1, CHCl<sub>3</sub>) for (*R*)-**2e**. [α]<sub>D</sub><sup>25</sup> = 27.354 (*c* 0.1, CHCl<sub>3</sub>) for (*S*)-**2e**.

HRMS (ESI) calcd for C<sub>15</sub>H<sub>17</sub>N<sub>2</sub>O<sup>+</sup> [(M+H)<sup>+</sup>] 241.1335, found 241.1332.

Daicel Chiralpak OD-H column, isocratic elution: n-hexane/2-propanol 80:20, flow rate 1 mL/min, column temp 40 °C, retention times 13.190 min (major enantiomer), 19.153 min (minor enantiomer), 97% *ee* for (*R*)-**2e**, retention times 13.483 min (minor enantiomer), 18.737 min (major enantiomer), 91% *ee* for (*S*)-**2e**.

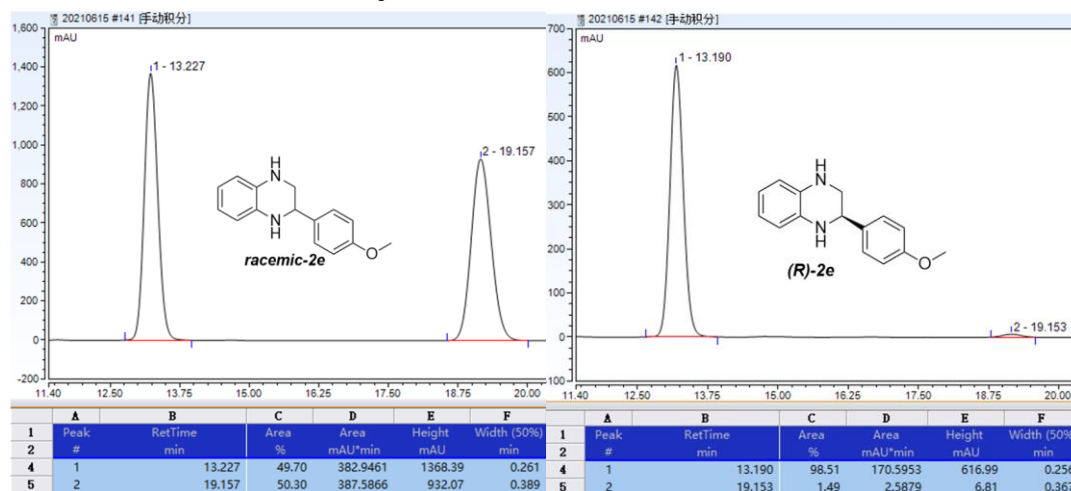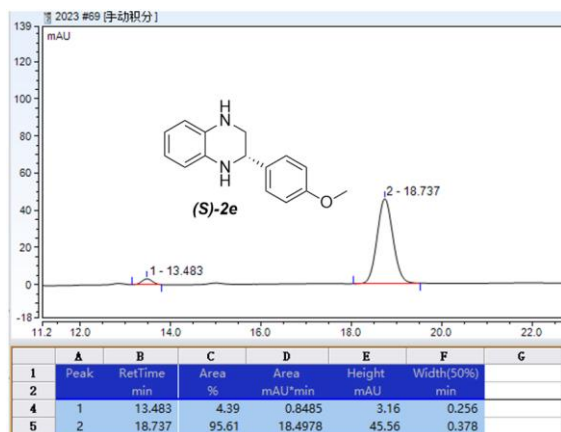

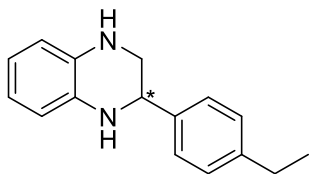

**(*R/S*)-2,6,7-trimethyl-1,2,3,4-tetrahydroquinoxaline (2f)<sup>5</sup>**

Yellow solid. <sup>1</sup>H NMR (400 MHz, Chloroform-*d*) δ 7.30 (d, *J* = 7.9 Hz, 2H), 7.20 (d, *J* = 7.8 Hz, 2H), 6.62 (m, 2H), 6.57 (m, 2H), 4.45 (dd, *J* = 8.3, 3.1 Hz, 1H), 4.05 – 3.58 (m, 2H), 3.44 (dd, *J* = 11.1, 3.1 Hz, 1H), 3.31 (dd, *J* = 11.0, 8.2 Hz, 1H), 2.65 (q, *J* = 7.6 Hz, 2H), 1.24 (t, *J* = 7.6 Hz, 3H). <sup>13</sup>C NMR (101 MHz, Chloroform-*d*) δ 144.09, 139.14, 134.29, 132.90, 128.21, 127.05, 118.94, 118.79, 114.75, 114.46, 54.53, 49.24, 28.62, 15.70.

$[\alpha]_D^{25} = -76.725$  (*c* 0.1, CHCl<sub>3</sub>) for (*R*)-**2f**.  $[\alpha]_D^{25} = 62.373$  (*c* 0.1, CHCl<sub>3</sub>) for (*S*)-**2f**.

HRMS (ESI) calcd for C<sub>16</sub>H<sub>19</sub>N<sub>2</sub><sup>+</sup> [(M+H)<sup>+</sup>] 239.1543, found 239.1544.

Daicel Chiralpak OD-H column, isocratic elution: n-hexane/2-propanol 80:20, flow rate 1 mL/min, column temp 40 °C, retention times 9.330 min (major enantiomer), 12.263 min (minor enantiomer), 95% *ee* for (*R*)-**2f**, retention times 9.250 min (minor enantiomer), 12.480 min (major enantiomer), 91% *ee* for (*S*)-**2f**.

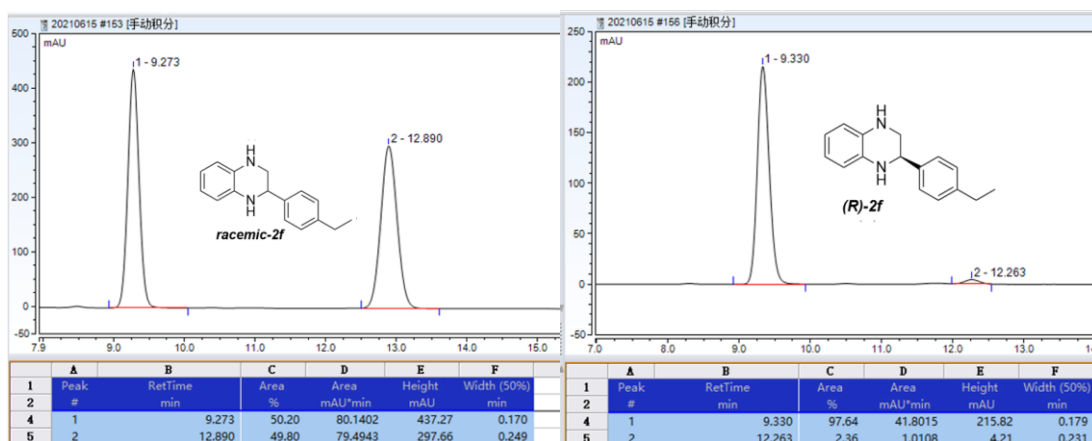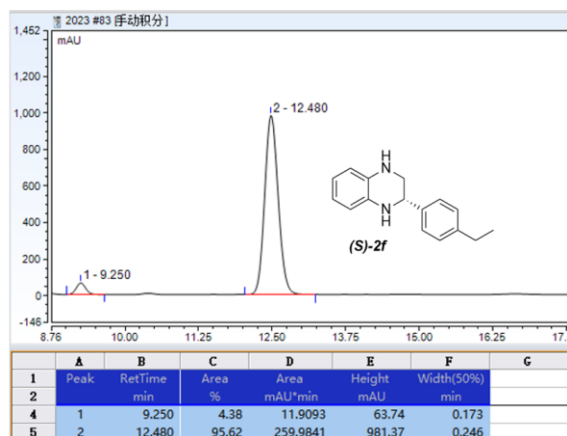

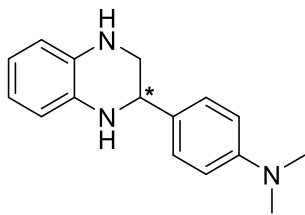

**(*R/S*)-N,N-dimethyl-4-(1,2,3,4-tetrahydroquinoxalin-2-yl)aniline (2g)**

Yellow solid.  $^1\text{H}$  NMR (400 MHz, Chloroform-*d*)  $\delta$  7.27 – 7.22 (m, 3H), 6.77 – 6.70 (m, 2H), 6.65 – 6.51 (m, 4H), 4.37 (dd,  $J = 8.5, 3.1$  Hz, 1H), 3.40 (dd,  $J = 11.0, 3.1$  Hz, 1H), 3.30 (dd,  $J = 11.0, 8.4$  Hz, 1H), 2.95 (s, 6H).  $^{13}\text{C}$  NMR (101 MHz, Chloroform-*d*)  $\delta$  150.48, 132.93, 127.87, 118.81, 118.64, 114.64, 114.38, 54.19, 49.38, 40.74, 29.78.

$[\alpha]_{\text{D}}^{25} = -52.359$  (*c* 0.1,  $\text{CHCl}_3$ ) for (*R*)-**2g**.  $[\alpha]_{\text{D}}^{25} = 39.018$  (*c* 0.1,  $\text{CHCl}_3$ ) for (*S*)-**2g**.

HRMS (ESI) calcd for  $\text{C}_{16}\text{H}_{19}\text{N}_3^+$  [(M+H) $^+$ ] 253.1579, found 253.1576.

Daicel Chiralpak OD-H column, isocratic elution: n-hexane/2-propanol 90:10, flow rate 0.8 mL/min, column temp 40 °C, retention time 24.460 min (major enantiomer), 32.627 min (minor enantiomer), 94% *ee* for (*R*)-**2g**, retention times 23.853 min (minor enantiomer), 32.757 min (major enantiomer), 92% *ee* for (*S*)-**2g**.

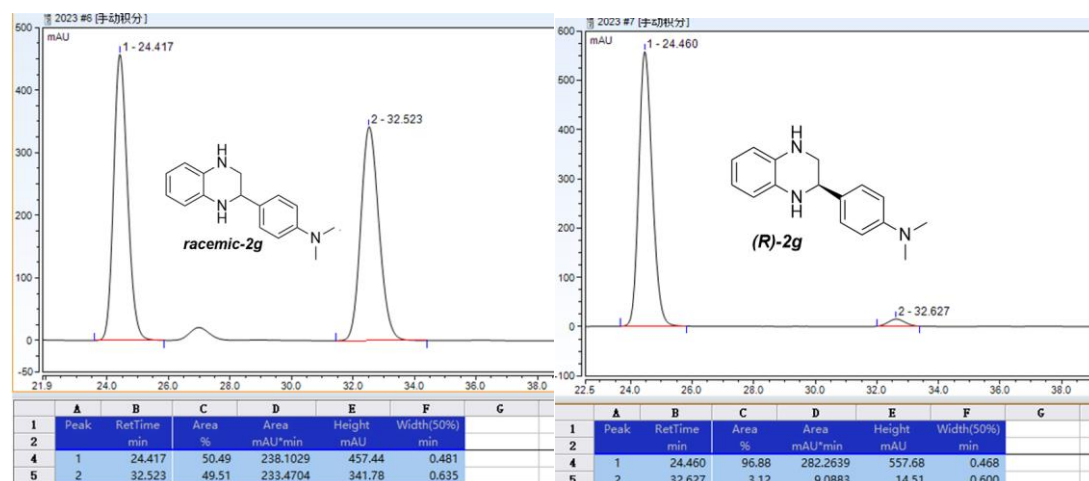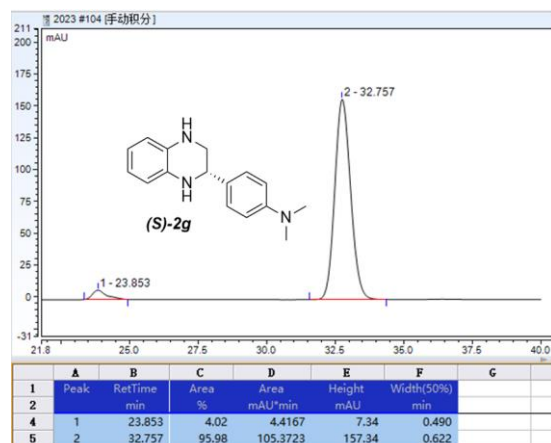

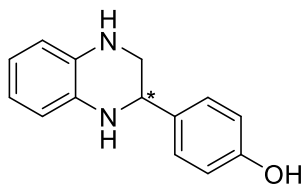

**(*R/S*)-4-(1,2,3,4-tetrahydroquinoxalin-2-yl)phenol (2h)**

Yellow solid.  $^1\text{H}$  NMR (400 MHz, Chloroform-*d*)  $\delta$  7.23 – 7.18 (m, 2H), 6.80 – 6.75 (m, 2H), 6.65 – 6.62 (m, 2H), 6.59 – 6.54 (m, 2H), 4.39 (dd,  $J = 8.3, 3.0$  Hz, 1H), 3.39 (dd,  $J = 11.1, 3.1$  Hz, 1H), 3.28 – 3.20 (m, 1H).  $^{13}\text{C}$  NMR (101 MHz, Chloroform-*d*)  $\delta$  150.48, 134.52, 132.93, 129.51, 127.87, 118.81, 118.64, 114.64, 114.38, 112.71, 54.19, 49.38.

$[\alpha]_{\text{D}}^{25} = -61.045$  ( $c$  0.1,  $\text{CHCl}_3$ ) for (*R*)-**2h**.  $[\alpha]_{\text{D}}^{25} = 30.013$  ( $c$  0.1,  $\text{CHCl}_3$ ) for (*S*)-**2h**.

HRMS (ESI) calcd for  $\text{C}_{14}\text{H}_{14}\text{N}_2\text{O}^+$  [(*M*+*H*) $^+$ ] 226.1106, found 226.1102.

Daicel Chiralpak OD-H column, isocratic elution: n-hexane/2-propanol 80:20, flow rate 1 mL/min, column temp 40 °C, retention time 16.320 min (major enantiomer), 17.637 min (minor enantiomer), 91% *ee* for (*R*)-**2h**, retention time 16.463 min (minor enantiomer), 17.627 min (major enantiomer), 91% *ee* for (*S*)-**2h**.

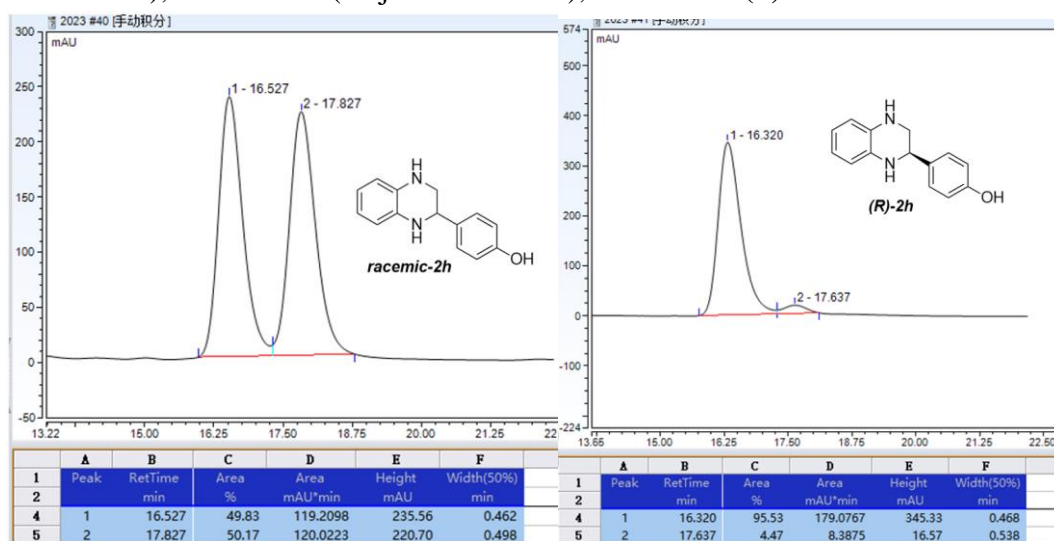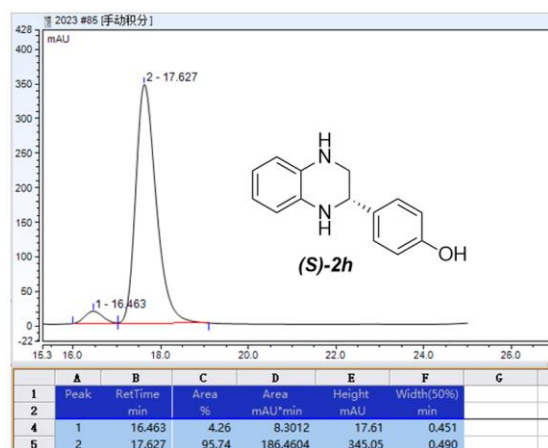



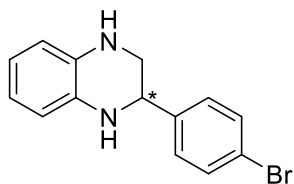

**(*R/S*)-2-(4-bromophenyl)-1,2,3,4-tetrahydroquinoxaline (**2i**)<sup>4</sup>**

Yellow solid. <sup>1</sup>H NMR (400 MHz, Chloroform-*d*) δ 7.48 (d, *J* = 6.0 Hz, 2H), 7.29 – 7.23 (m, 2H), 6.68 – 6.53 (m, 4H), 4.45 (dt, *J* = 8.1, 2.8 Hz, 1H), 3.87 (s, 2H), 3.43 (dt, *J* = 11.1, 2.8 Hz, 1H), 3.27 (ddd, *J* = 10.7, 7.8, 2.4 Hz, 1H). <sup>13</sup>C NMR (101 MHz, Chloroform-*d*) δ 141.03, 133.81, 132.79, 131.82, 121.74, 119.11, 119.06, 114.84, 114.59, 54.21, 48.99.

$[\alpha]_D^{25} = -82.394$  (*c* 0.1, CHCl<sub>3</sub>) for (*R*)-**2i**.  $[\alpha]_D^{25} = 61.363$  (*c* 0.1, CHCl<sub>3</sub>) for (*S*)-**2i**.

HRMS (ESI) calcd for C<sub>14</sub>H<sub>13</sub>BrN<sub>2</sub><sup>+</sup> [(M+H)<sup>+</sup>] 288.0262, found 288.0265.

Daicel Chiralpak OD-H column, isocratic elution: n-hexane/2-propanol 80:20, flow rate 1 mL/min, column temp 40 °C, retention time 16.173 min (major enantiomer), 27.533 min (minor enantiomer), 90% *ee* for (*R*)-**2i**, retention time 16.033 min (minor enantiomer), 27.277 min (major enantiomer), 74% *ee* for (*S*)-**2i**.

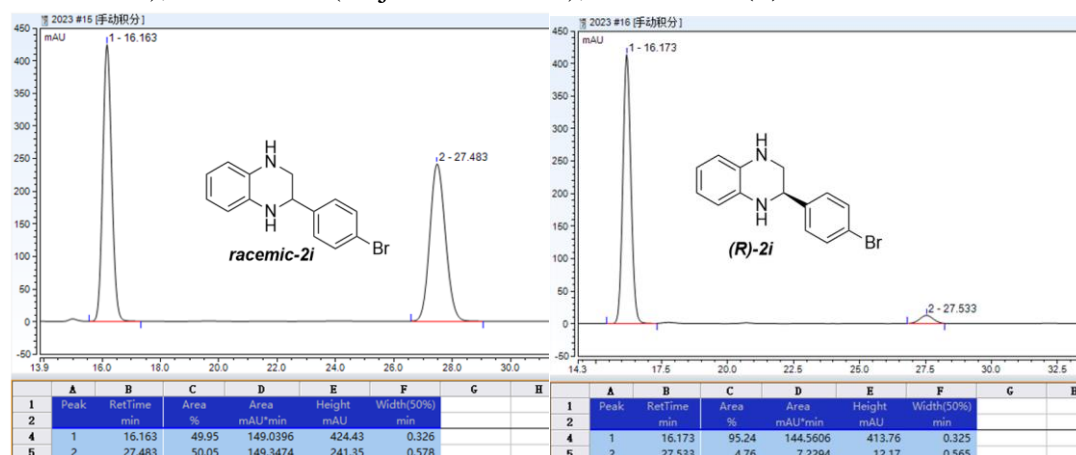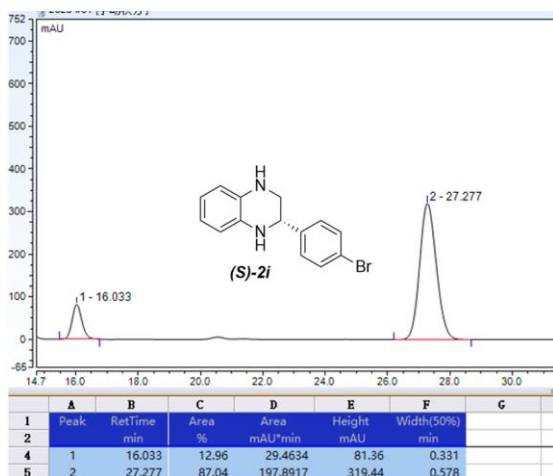



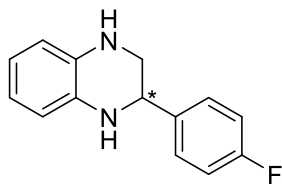

**(*R/S*)-2-(4-fluorophenyl)-1,2,3,4-tetrahydroquinoxaline (2j)<sup>4</sup>**

Yellow solid. <sup>1</sup>H NMR (400 MHz, Chloroform-*d*) δ 7.33 (t, *J* = 6.1 Hz, 2H), 7.03 (m, 2H), 6.63 (d, *J* = 3.2 Hz, 2H), 6.56 (d, *J* = 3.3 Hz, 2H), 4.45 (dt, *J* = 8.1, 2.6 Hz, 1H), 3.80 (s, 2H), 3.41 (dt, *J* = 11.2, 2.6 Hz, 1H), 3.26 (ddd, *J* = 10.8, 8.1, 2.1 Hz, 1H). <sup>13</sup>C NMR (101 MHz, Chloroform-*d*) δ 163.70, 161.25, 137.70 (d, *J* = 3.2 Hz), 133.99, 132.86, 119.03, 115.67, 115.46, 114.80, 114.58, 54.09, 49.25.

$[\alpha]_D^{25} = -88.047$  (*c* 0.1, CHCl<sub>3</sub>) for (*R*)-**2j**.  $[\alpha]_D^{25} = 79.367$  (*c* 0.1, CHCl<sub>3</sub>) for (*S*)-**2j**.

HRMS (ESI) calcd for C<sub>14</sub>H<sub>14</sub>FN<sub>2</sub><sup>+</sup> [(*M*+*H*)<sup>+</sup>] 229.1136, found 229.1134.

Daicel Chiralpak OD-H column, isocratic elution: n-hexane/2-propanol 80:20, flow rate 1 mL/min, column temp 40 °C, retention times 12.877 min (major enantiomer), 21.500 min (minor enantiomer), 95% *ee* for (*R*)-**2j**, retention times 12.733 min (minor enantiomer), 20.170 min (major enantiomer), 83% *ee* for (*S*)-**2j**.

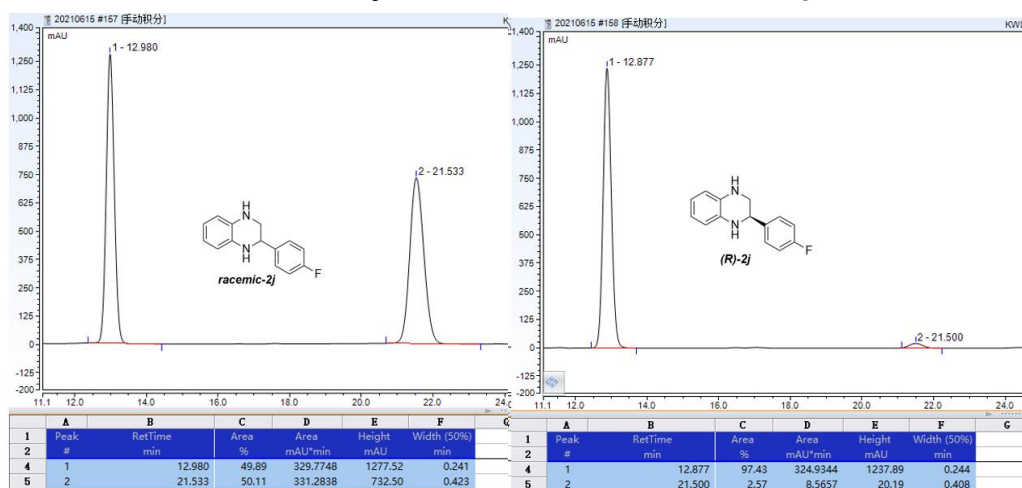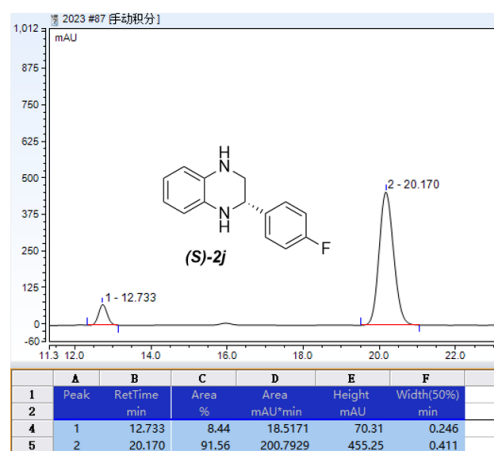

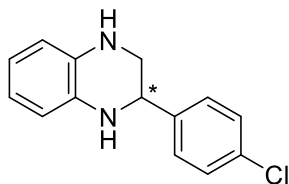

**(*R/S*)-2-(4-chlorophenyl)-1,2,3,4-tetrahydroquinoxaline (2k)**

Yellow solid.  $^1\text{H NMR}$  (400 MHz, Chloroform-*d*)  $\delta$  7.36 – 7.27 (m, 4H), 6.64 (dd,  $J = 5.7, 3.4$  Hz, 2H), 6.57 (dd,  $J = 5.8, 3.1$  Hz, 2H), 4.45 (dd,  $J = 8.0, 3.1$  Hz, 1H), 3.42 (dd,  $J = 11.1, 3.1$  Hz, 1H), 3.26 (dd,  $J = 11.1, 8.0$  Hz, 1H).  $^{13}\text{C NMR}$  (101 MHz, Chloroform-*d*)  $\delta$  140.50, 133.85, 133.62, 132.80, 128.86, 128.42, 119.09, 119.04, 114.84, 114.59, 54.14, 49.05.

$[\alpha]_{\text{D}}^{25} = -77.044$  ( $c$  0.1,  $\text{CHCl}_3$ ) for (*R*)-**2k**.  $[\alpha]_{\text{D}}^{25} = 58.696$  ( $c$  0.1,  $\text{CHCl}_3$ ) for (*S*)-**2k**.

HRMS (ESI) calcd for  $\text{C}_{14}\text{H}_{13}\text{ClN}_2^+ [(M+H)^+]$  244.0767, found 244.0769.

Daicel Chiralpak OD-H column, isocratic elution: n-hexane/2-propanol 80:20, flow rate 1 mL/min, column temp 40 °C, retention times 14.347 min (major enantiomer), 25.883 min (minor enantiomer), 87% *ee* for (*R*)-**2k**, retention times 14.927 min (minor enantiomer), 24.990 min (major enantiomer), 76% *ee* for (*S*)-**2k**.

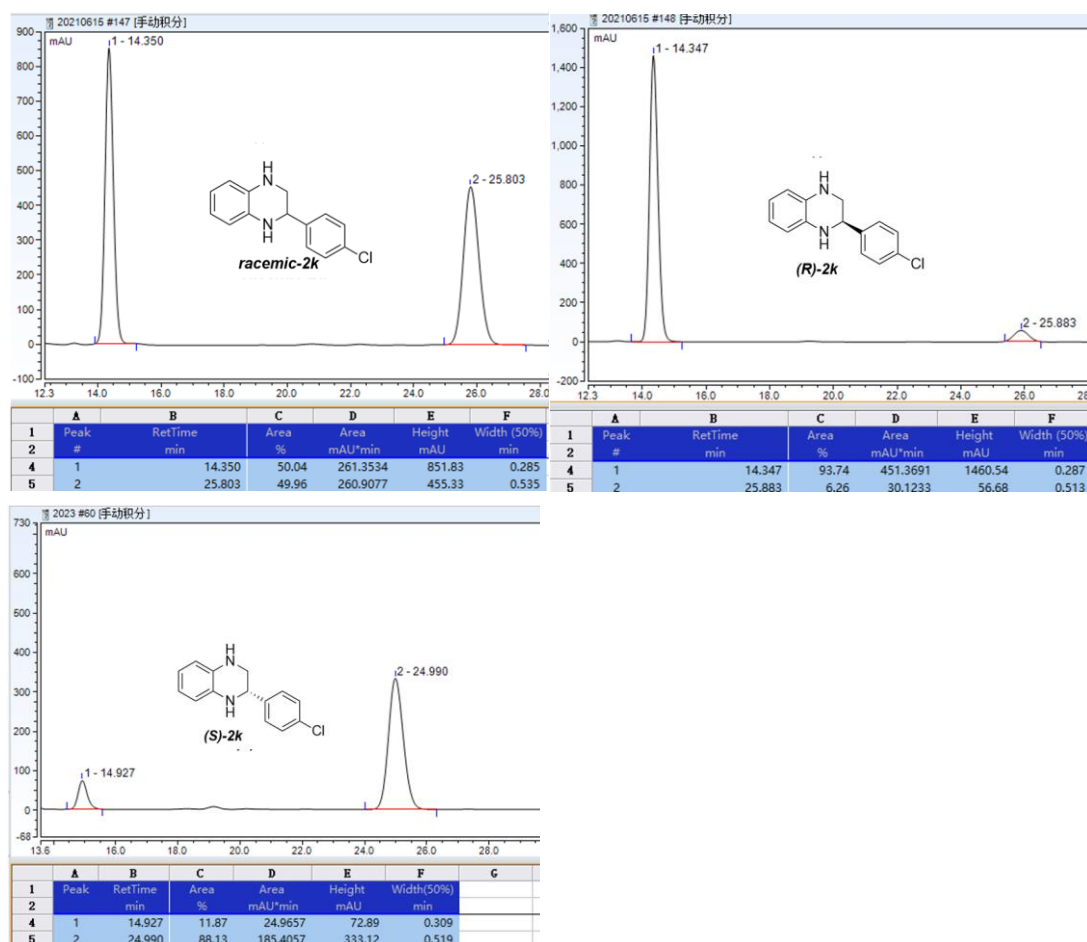

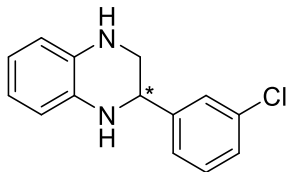

**(*R/S*)-2-(3-chlorophenyl)-1,2,3,4-tetrahydroquinoline (2I)**

White solid.  $^1\text{H}$  NMR (400 MHz, Chloroform-*d*)  $\delta$  7.37 (d,  $J = 2.0$  Hz, 1H), 7.33 – 7.22 (m, 3H), 6.68 – 6.60 (m, 2H), 6.61 – 6.52 (m, 2H), 4.44 (dd,  $J = 8.0, 3.1$  Hz, 1H), 3.86 (s, 1H), 3.43 (dd,  $J = 11.1, 3.1$  Hz, 1H), 3.27 (dd,  $J = 11.1, 8.0$  Hz, 1H).  $^{13}\text{C}$  NMR (101 MHz, Chloroform-*d*)  $\delta$  144.11, 134.62, 133.79, 132.80, 129.99, 128.10, 127.24, 125.30, 119.14, 119.09, 114.88, 114.65, 54.34, 49.00.

$[\alpha]_{\text{D}}^{25} = -81.135$  ( $c$  0.1,  $\text{CHCl}_3$ ) for (*R*)-**2I**.  $[\alpha]_{\text{D}}^{25} = 86.704$  ( $c$  0.1,  $\text{CHCl}_3$ ) for (*S*)-**2I**.

HRMS (ESI) calcd for  $\text{C}_{14}\text{H}_{13}\text{ClN}_2^+$  [(*M*+*H*) $^+$ ] 244.0767, found 244.0768.

Daicel Chiralpak OD-H column, isocratic elution: n-hexane/2-propanol 80:20, flow rate 1 mL/min, column temp 40 °C, retention times 13.437 min (major enantiomer), 22.740 min (minor enantiomer), 84% *ee* for (*R*)-**2I**, retention times 13.133 min (minor enantiomer), 22.560 min (major enantiomer), 84% *ee* for (*S*)-**2I**.

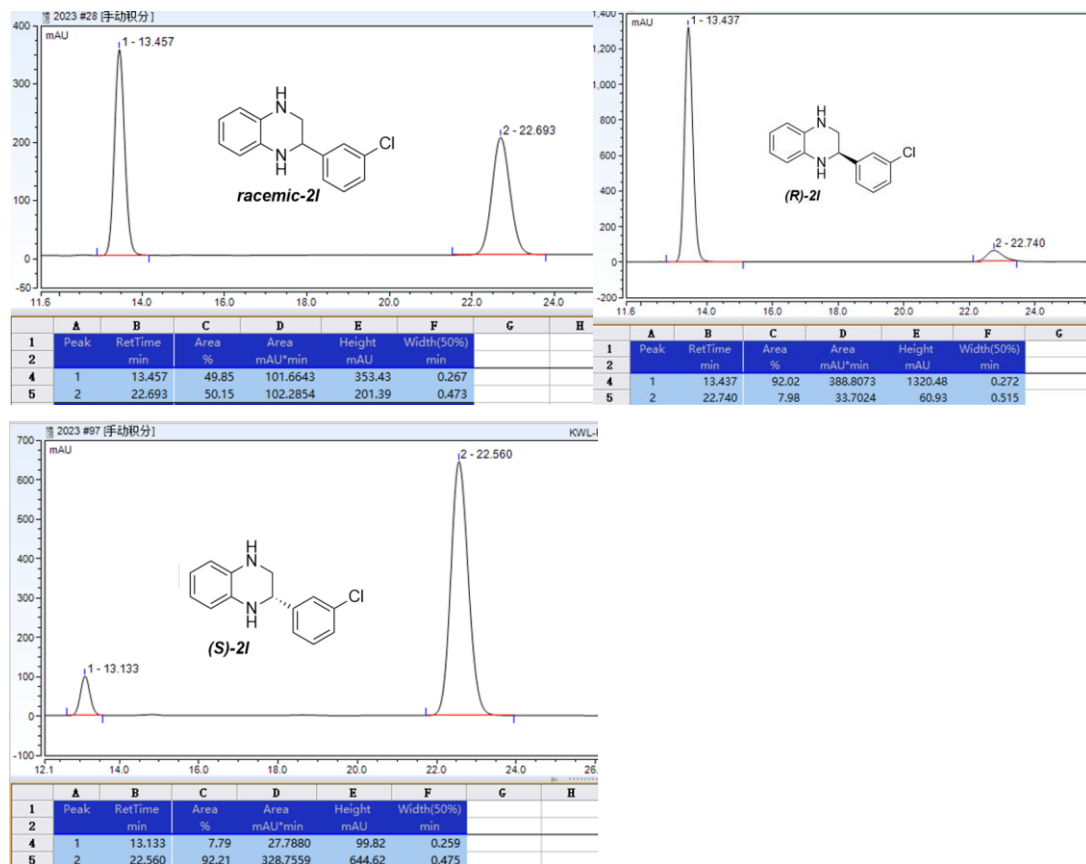

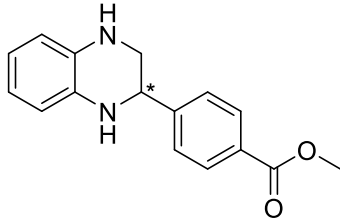

**methyl (*R/S*)-4-(1,2,3,4-tetrahydroquinoxalin-2-yl)benzoate (**2m**)**

Yellow solid.  $^1\text{H}$  NMR (400 MHz, Chloroform-*d*)  $\delta$  8.10 – 8.03 (m, 2H), 7.49 (d,  $J$  = 8.2 Hz, 2H), 6.75 – 6.57 (m, 4H), 4.57 (dd,  $J$  = 7.8, 3.1 Hz, 1H), 3.95 (s, 3H), 3.50 (dd,  $J$  = 11.1, 3.1 Hz, 1H), 3.33 (dd,  $J$  = 11.1, 7.8 Hz, 1H).  $^{13}\text{C}$  NMR (101 MHz, Chloroform-*d*)  $\delta$  166.97, 147.20, 133.78, 132.81, 130.01, 129.73, 127.05, 119.15, 119.06, 114.91, 114.63, 54.58, 52.24, 48.85

$[\alpha]_{\text{D}}^{25}$  = -82.359 ( $c$  0.1,  $\text{CHCl}_3$ ) for (***R***)-**2m**.  $[\alpha]_{\text{D}}^{25}$  = 55.700 ( $c$  0.1,  $\text{CHCl}_3$ ) for (***S***)-**2m**.

HRMS (ESI) calcd for  $\text{C}_{16}\text{H}_{17}\text{N}_2\text{O}_2^+$  [(**M+H**) $^+$ ] 269.1285, found 269.1287.

Daicel Chiralpak OD-H column, isocratic elution: *n*-hexane/2-propanol 80:20, flow rate 1 mL/min, column temp 40 °C, retention time 22.387 min (major enantiomer), 33.850 min (minor enantiomer), 97% *ee* for (***R***)-**2m**, retention time 21.843 min (minor enantiomer), 35.103 min (major enantiomer), 81% *ee* for (***S***)-**2m**.

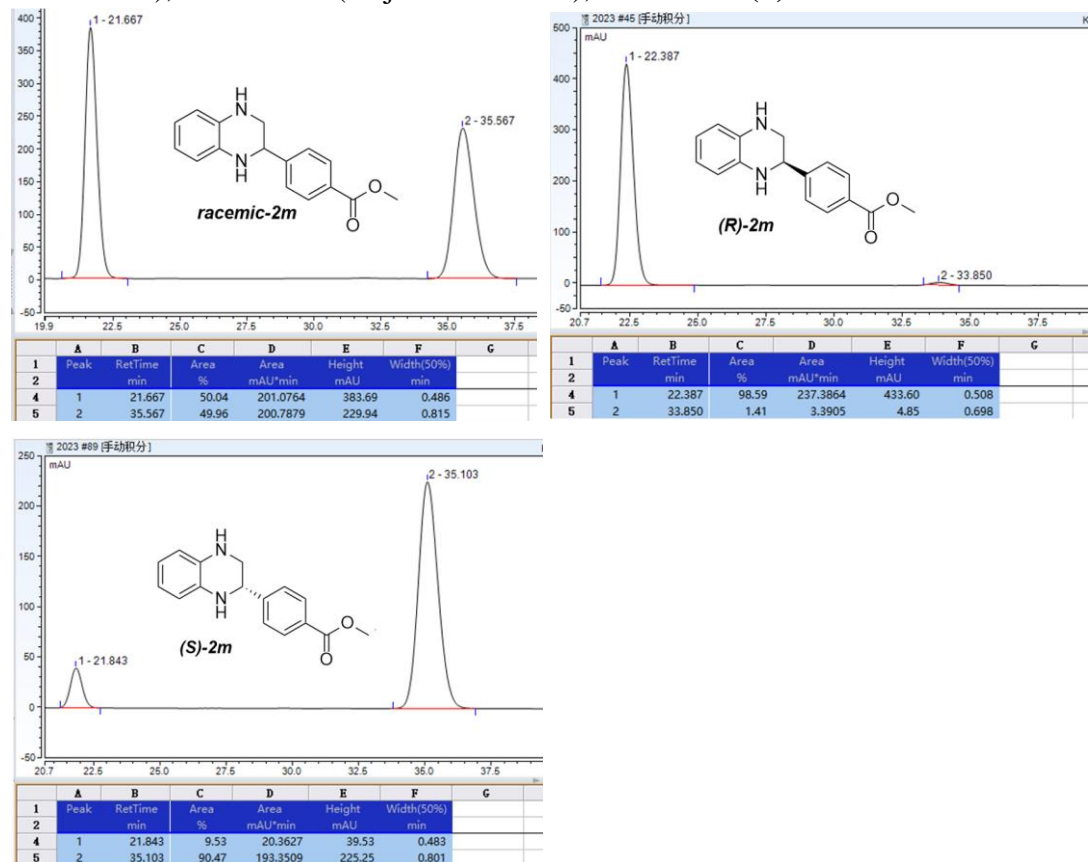

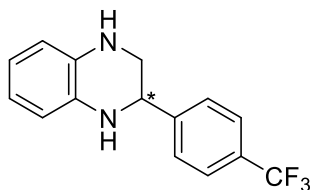

**(*R/S*)-2-(4-(trifluoromethyl)phenyl)-1,2,3,4-tetrahydroquinoxaline (2n)<sup>1</sup>**

Yellow solid. <sup>1</sup>H NMR (400 MHz, Chloroform-*d*) δ 7.66 (d, *J* = 8.0 Hz, 2H), 7.55 (d, *J* = 7.9 Hz, 2H), 6.78 – 6.66 (m, 2H), 6.69 – 6.56 (m, 2H), 4.61 (dd, *J* = 7.8, 3.1 Hz, 1H), 3.97 (s, 1H), 3.88 (s, 1H), 3.52 (dd, *J* = 11.1, 3.1 Hz, 1H), 3.40 – 3.30 (m, 1H). <sup>13</sup>C NMR (101 MHz, Chloroform-*d*) δ 146.12, 133.64, 132.78, 129.98, 127.41, 125.67, 119.22, 119.16, 114.93, 114.65, 54.43, 48.83.

[α]<sub>D</sub><sup>25</sup> = -48.696 (*c* 0.1, CHCl<sub>3</sub>) for (*R*)-**2n**. [α]<sub>D</sub><sup>25</sup> = 75.700 (*c* 0.1, CHCl<sub>3</sub>) for (*S*)-**2n**.

HRMS (ESI) calcd for C<sub>15</sub>H<sub>13</sub>F<sub>3</sub>N<sub>2</sub><sup>+</sup> [(M+H)<sup>+</sup>] 278.1031, found 278.1034.

Daicel Chiralpak OD-H column, isocratic elution: n-hexane/2-propanol 80:20, flow rate 1 mL/min, column temp 40 °C, retention times 14.270 min (major enantiomer), 27.203 min (minor enantiomer), 84% *ee* for (*R*)-**2n**, retention times 14.737 min (minor enantiomer), 25.760 min (major enantiomer), 81% *ee* for (*S*)-**2n**.

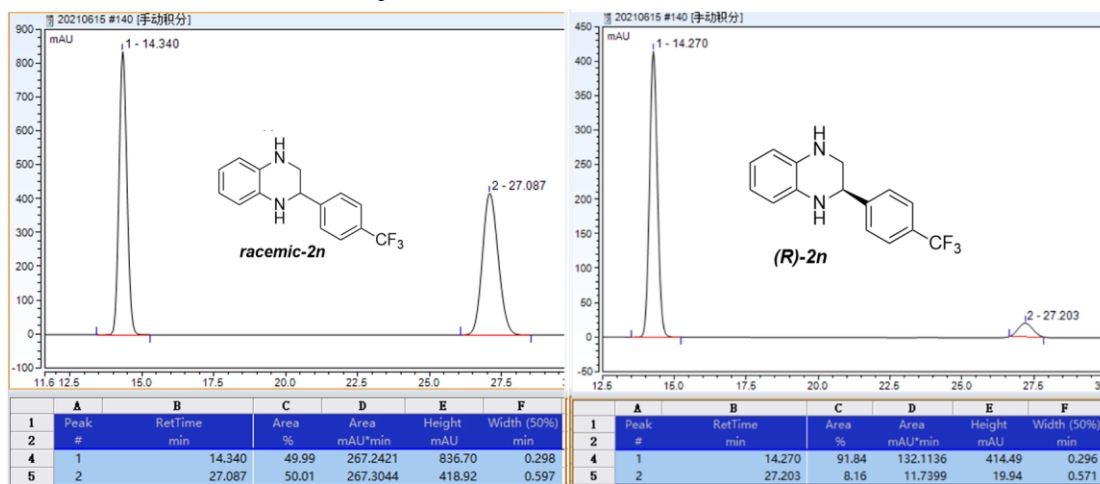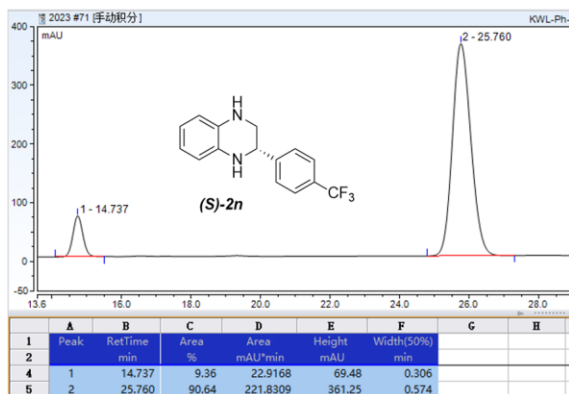

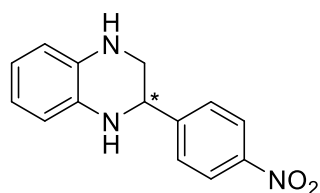

**(*R/S*)-2-(4-nitrophenyl)-1,2,3,4-tetrahydroquinoxaline (2o)**

Dark red solid.  $^1\text{H}$  NMR (400 MHz, Chloroform-*d*)  $\delta$  8.19 (dd,  $J = 8.7, 1.4$  Hz, 2H), 7.58 – 7.50 (m, 2H), 6.72 – 6.54 (m, 4H), 4.62 (dd,  $J = 7.3, 3.1$  Hz, 1H), 3.99 (s, 1H), 3.49 (dd,  $J = 11.1, 2.0$  Hz, 1H), 3.29 (dd,  $J = 11.1, 7.2$  Hz, 1H).  $^{13}\text{C}$  NMR (101 MHz, Chloroform-*d*)  $\delta$  149.71, 147.56, 133.26, 132.72, 127.89, 123.92, 119.39, 119.30, 115.04, 114.73, 54.32, 48.49.

$[\alpha]_{\text{D}}^{25} = -22.009$  ( $c$  0.1,  $\text{CHCl}_3$ ) for (*R*)-**2o**.  $[\alpha]_{\text{D}}^{25} = 32.031$  ( $c$  0.1,  $\text{CHCl}_3$ ) for (*S*)-**2o**.

HRMS (ESI) calcd for  $\text{C}_{14}\text{H}_{13}\text{N}_3\text{O}_2^+$  [(M+H) $^+$ ] 255.1008, found 255.1003.

Daicel Chiralpak OD-H column, isocratic elution: n-hexane/2-propanol 70:30, flow rate 1 mL/min, column temp 40 °C, retention time 26.600 min (major enantiomer), 28.470 min (minor enantiomer), 72% *ee* for (*R*)-**2o**, retention times 25.800 min (minor enantiomer), 39.367 min (major enantiomer), 73% *ee* for (*S*)-**2o**.

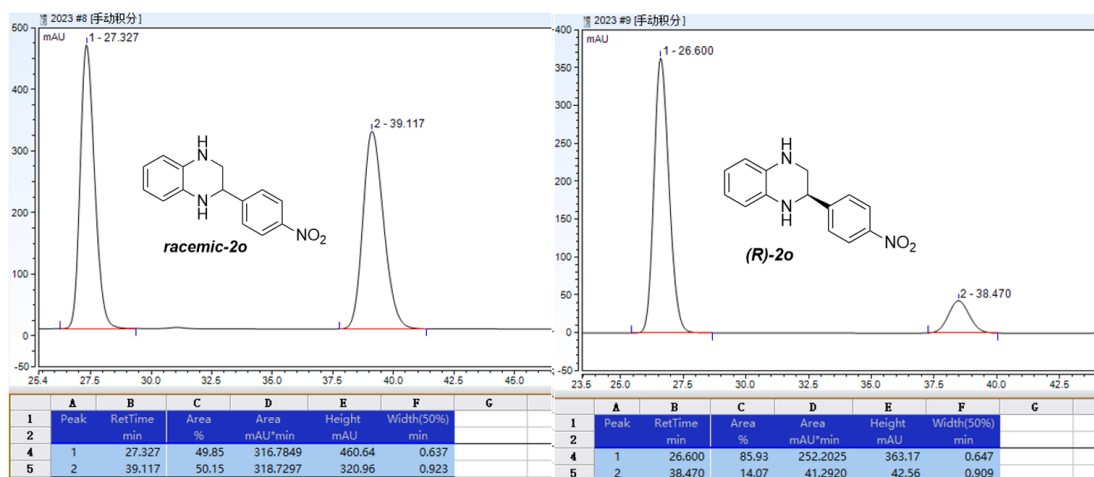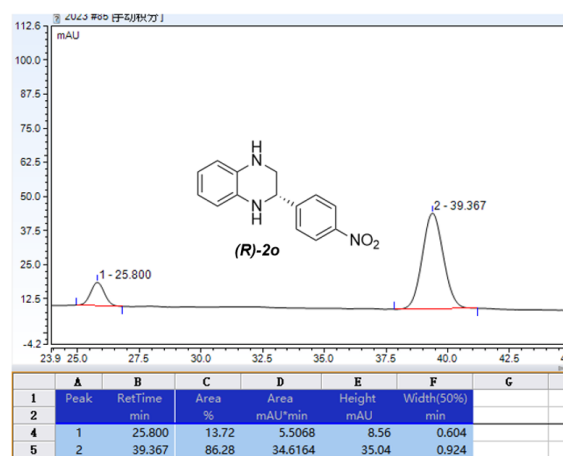

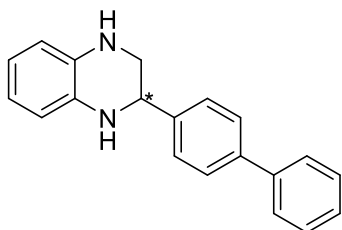

**(R/S)-2-([1,1'-biphenyl]-4-yl)-1,2,3,4-tetrahydroquinoxaline (2p)**

White solid.  $^1\text{H}$  NMR (400 MHz, Chloroform-*d*)  $\delta$  7.73 – 7.29 (m, 9H), 6.66 – 6.61 (m, 2H), 6.58 (d,  $J = 5.9$  Hz, 2H), 4.51 (d,  $J = 7.8$  Hz, 1H), 3.88 (s, 2H), 3.51 – 3.44 (m, 1H), 3.35 (t,  $J = 9.5$  Hz, 1H).  $^{13}\text{C}$  NMR (101 MHz, Chloroform-*d*)  $\delta$  141.01, 140.94, 140.84, 134.17, 132.92, 128.92, 127.53, 127.47, 127.20, 119.06, 118.92, 114.85, 114.57, 54.51, 49.16.

$[\alpha]_{\text{D}}^{25} = -71.373$  ( $c$  0.1,  $\text{CHCl}_3$ ) for (**R**)-**2p**.  $[\alpha]_{\text{D}}^{25} = 57.028$  ( $c$  0.1,  $\text{CHCl}_3$ ) for (**S**)-**2p**

HRMS (ESI) calcd for  $\text{C}_{20}\text{H}_{19}\text{N}_2^+$  [(M+H) $^+$ ] 287.1543, found 287.1544.

Daicel Chiralpak OD-H column, isocratic elution: n-hexane/2-propanol 80:20, flow rate 1 mL/min, column temp 40 °C, retention times 21.343 min (major enantiomer), 37.650 min (minor enantiomer), 96% *ee* for (**R**)-**2p**, retention times 22.430 min (minor enantiomer), 36.220 min (major enantiomer), 92% *ee* for (**S**)-**2p**.

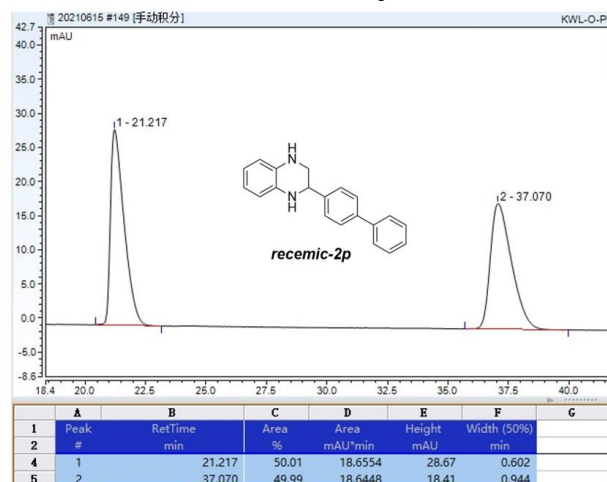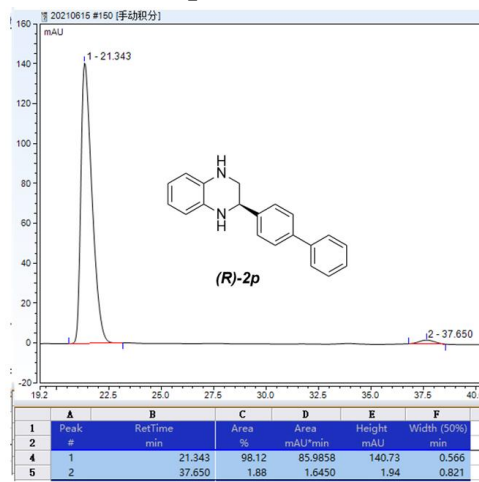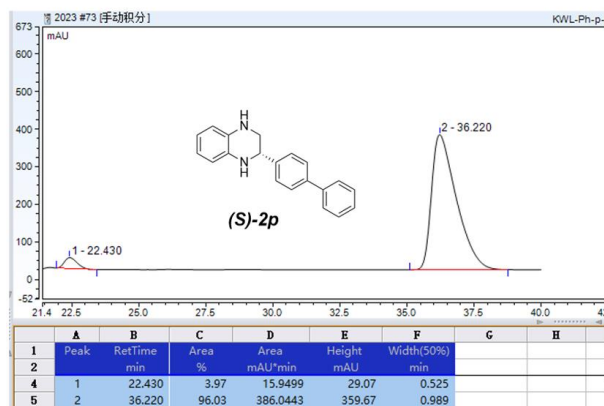

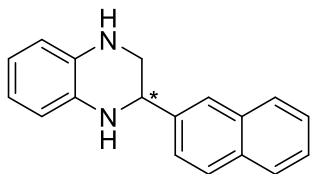

**(*R/S*)-2-(naphthalen-2-yl)-1,2,3,4-tetrahydroquinoxaline (2q)**

Gray solid.  $^1\text{H}$  NMR (400 MHz, Chloroform-*d*)  $\delta$  7.86 – 7.81 (m, 4H), 7.52 – 7.44 (m, 3H), 6.70 – 6.55 (m, 4H), 4.63 (dd,  $J = 8.2, 3.2$  Hz, 1H), 3.98 (s, 1H), 3.50 (dd,  $J = 11.1, 3.2$  Hz, 1H), 3.39 (dd,  $J = 11.1, 8.2$  Hz, 1H).  $^{13}\text{C}$  NMR (101 MHz, Chloroform-*d*)  $\delta$  139.28, 134.21, 133.45, 133.23, 132.95, 128.50, 128.01, 127.78, 126.33, 126.07, 125.83, 125.17, 119.07, 118.95, 114.86, 114.59, 54.90, 49.22.

$[\alpha]_{\text{D}}^{25} = -79.049$  ( $c$  0.1,  $\text{CHCl}_3$ ) for (*R*)-**2q**.  $[\alpha]_{\text{D}}^{25} = 55.038$  ( $c$  0.1,  $\text{CHCl}_3$ ) for (*S*)-**2q**.

HRMS (ESI) calcd for  $\text{C}_{18}\text{H}_{16}\text{N}_2^+$  [(*M*+*H*) $^+$ ] 260.1313, found 260.1310.

Daicel Chiralpak OD-H column, isocratic elution: n-hexane/2-propanol 80:20, flow rate 1 mL/min, column temp 40 °C, retention times 17.570 min (major enantiomer), 26.787 min (minor enantiomer), 97% *ee* for (*R*)-**2q**, retention times 17.207 min (minor enantiomer), 26.587 min (major enantiomer), 87% *ee* for (*S*)-**2q**.

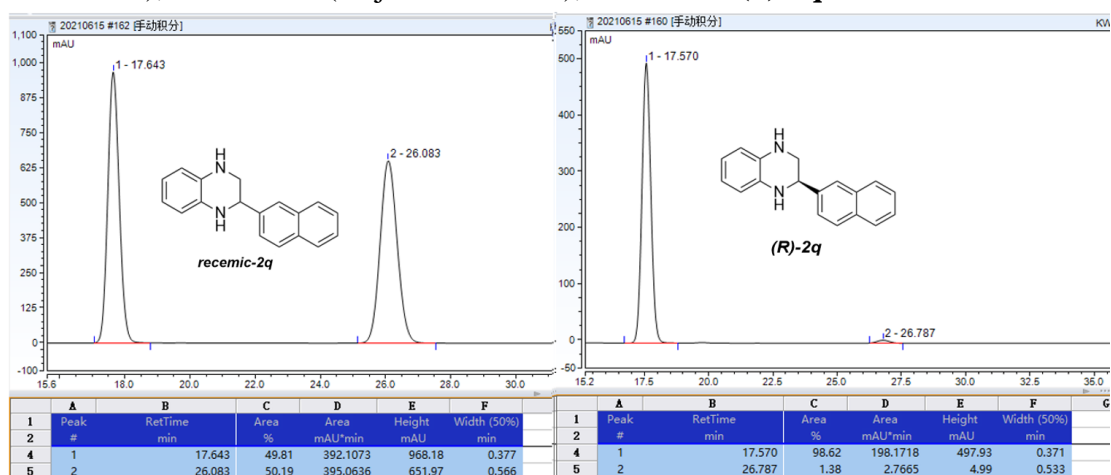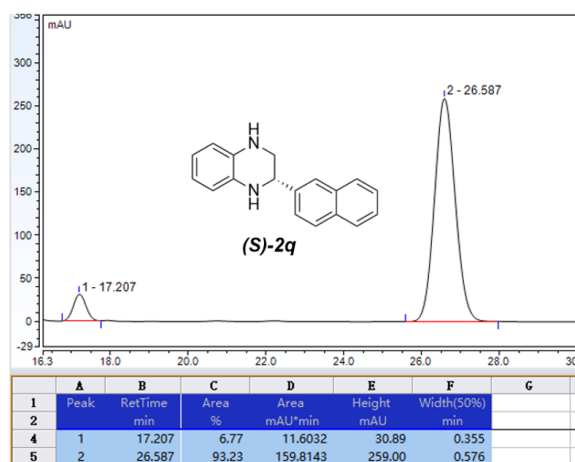



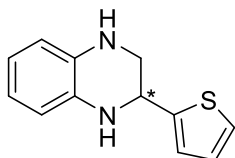

**(*R/S*)-2-(thiophen-2-yl)-1,2,3,4-tetrahydroquinoline (2r)**

Yellow solid.  $^1\text{H}$  NMR (400 MHz, Chloroform- $d$ )  $\delta$  7.25 (dd,  $J = 5.4, 1.5$  Hz, 1H), 7.04 (t,  $J = 2.2$  Hz, 1H), 6.98 (dd,  $J = 5.1, 3.5$  Hz, 1H), 6.69 – 6.59 (m, 2H), 6.59 – 6.51 (m, 2H), 4.82 (dd,  $J = 7.6, 3.1$  Hz, 1H), 3.54 (dd,  $J = 11.0, 3.1$  Hz, 1H), 3.41 (dd,  $J = 11.0, 7.6$  Hz, 1H).  $^{13}\text{C}$  NMR (101 MHz, Chloroform- $d$ )  $\delta$  145.67, 133.24, 132.90, 126.68, 125.02, 124.24, 119.36, 119.10, 114.89, 114.87, 50.67, 49.49.

$[\alpha]_{\text{D}}^{25} = -79.062$  ( $c$  0.1,  $\text{CHCl}_3$ ) for (*R*)-**2r**.  $[\alpha]_{\text{D}}^{25} = 17.305$  ( $c$  0.1,  $\text{CHCl}_3$ ) for (*S*)-**2r**.

HRMS (ESI) calcd for  $\text{C}_{12}\text{H}_{12}\text{N}_2\text{S}^+ [(M+H)^+]$  216.0721, found 216.0724.

Daicel Chiralpak OD-H column, isocratic elution: n-hexane/2-propanol 80:20, flow rate 1 mL/min, column temp 40 °C, retention time 12.907 min (major enantiomer), 18.223 min (minor enantiomer), 88% *ee* for (*R*)-**2r**, retention time 12.563 min (minor enantiomer), 17.837 min (major enantiomer), 77% *ee* for (*S*)-**2r**.

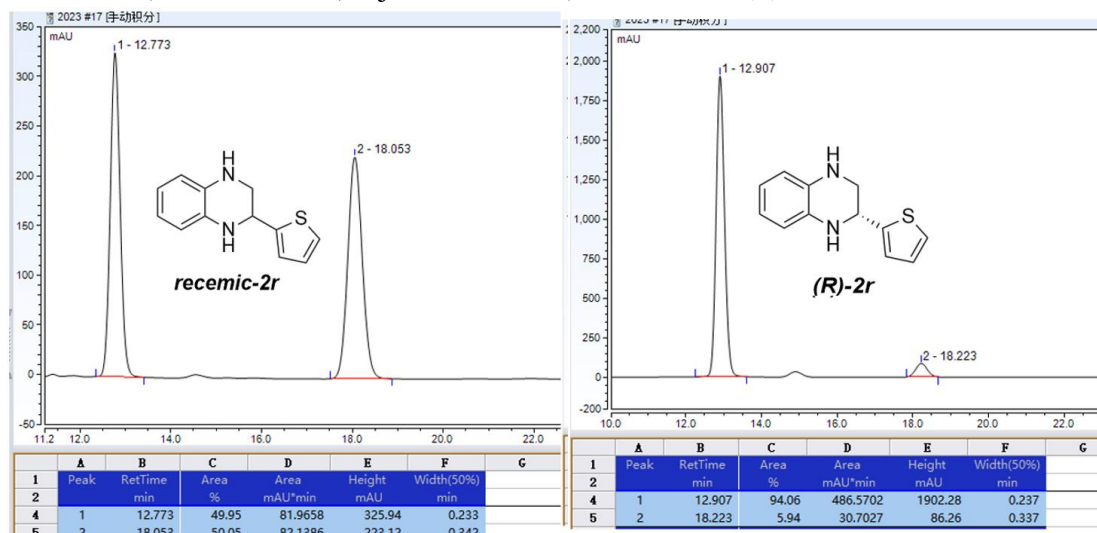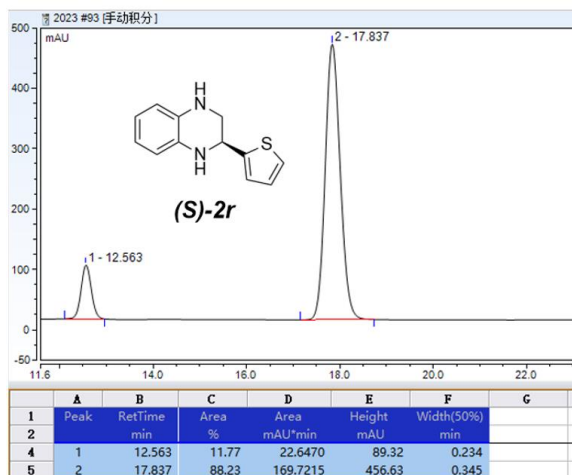

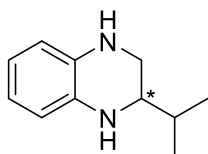

**(*R/S*)-2-isopropyl-1,2,3,4-tetrahydroquinoxaline (2s)**

Yellow oil.  $^1\text{H}$  NMR (400 MHz, Chloroform-*d*)  $\delta$  6.59 (m, 4H), 3.41 (dd,  $J = 10.2, 2.4$  Hz, 1H), 3.24 – 3.12 (m, 2H), 1.77 (m, 1H), 1.05 (dd,  $J = 18.9, 6.8$  Hz, 6H).  $^{13}\text{C}$  NMR (101 MHz, Chloroform-*d*)  $\delta$  133.65, 133.21, 118.58, 118.17, 114.13, 114.10, 55.80, 43.85, 18.50, 18.36.

$[\alpha]_{\text{D}}^{25} = 26.683$  (*c* 0.1,  $\text{CHCl}_3$ ) for (*R*)-**2s**.  $[\alpha]_{\text{D}}^{25} = 19.902$  (*c* 0.1,  $\text{CHCl}_3$ ) for (*S*)-**2s**.

HRMS (ESI) calcd for  $\text{C}_{11}\text{H}_{17}\text{N}_2^+$  [(*M*+*H*) $^+$ ] 177.1386, found 177.1382.

Daicel Chiralpak OD-H column, isocratic elution: n-hexane/2-propanol 80:20, flow rate 0.5 mL/min, column temp 40 °C, retention time 13.733 min (major enantiomer), 17.777 min (minor enantiomer), 94% *ee* for (*R*)-**2s**, retention time 13.410 min (minor enantiomer), 17.697 min (major enantiomer), 24% *ee* for (*S*)-**2s**.

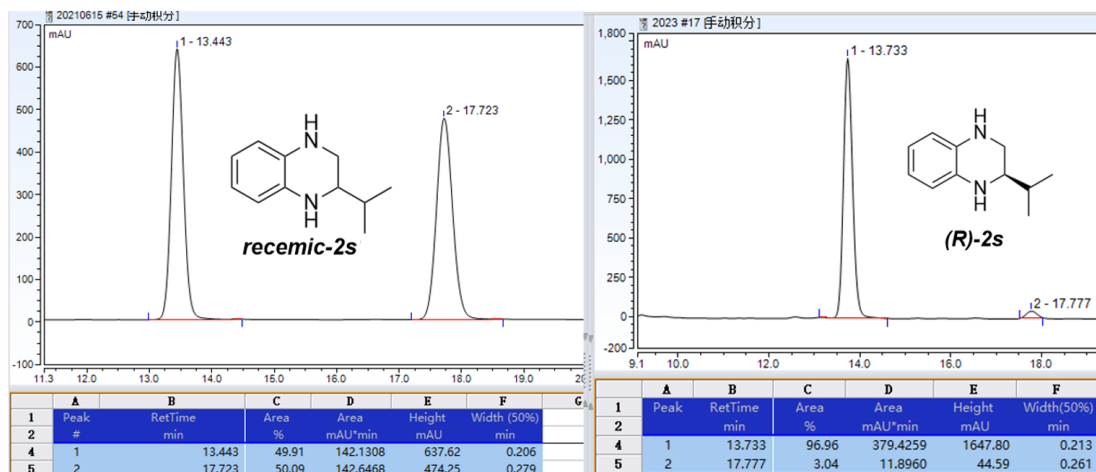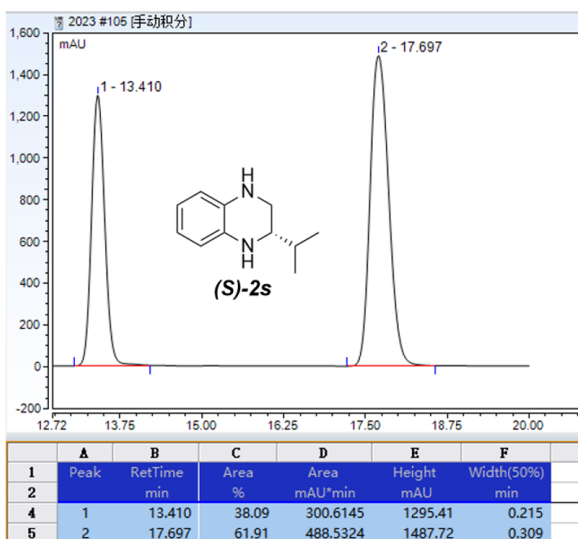

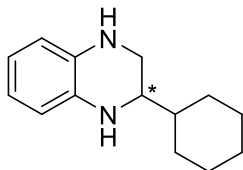

**(R/S)-2-cyclohexyl-1,2,3,4-tetrahydroquinoxaline (2t)**

Yellow solid.  $^1\text{H NMR}$  (400 MHz, Chloroform- $d$ )  $\delta$  6.82 – 6.37 (m, 4H), 3.41 (d,  $J$  = 10.4 Hz, 1H), 3.18 (dt,  $J$  = 24.0, 8.0 Hz, 2H), 1.83 (m, 5H), 1.47 – 1.08 (m, 6H).  $^{13}\text{CNMR}$  (126 MHz, Chloroform- $d$ )  $\delta$  133.89, 133.53, 118.81, 118.39, 114.38, 55.24, 44.03, 40.79, 29.21, 29.00, 26.49, 26.22, 26.17.

$[\alpha]_{\text{D}}^{25}$  = 36.697 ( $c$  0.1,  $\text{CHCl}_3$ ) for (**R**)-**2t**.  $[\alpha]_{\text{D}}^{25}$  = -20.004 ( $c$  0.1,  $\text{CHCl}_3$ ) for (**S**)-**2t**.

HRMS (ESI) calcd for  $\text{C}_{14}\text{H}_{20}\text{N}_2^+$  [(M+H) $^+$ ] 216.1626, found 216.1623.

Daicel Chiralpak OD-H column, isocratic elution: n-hexane/2-propanol 80:20, flow rate 0.5 mL/min, column temp 40 °C, retention time 14.210 min (major enantiomer), 17.253 min (minor enantiomer), 97% *ee* for (**R**)-**2t**, retention time 14.143 min (minor enantiomer), 17.147 min (major enantiomer), 30% *ee* for (**S**)-**2t**.

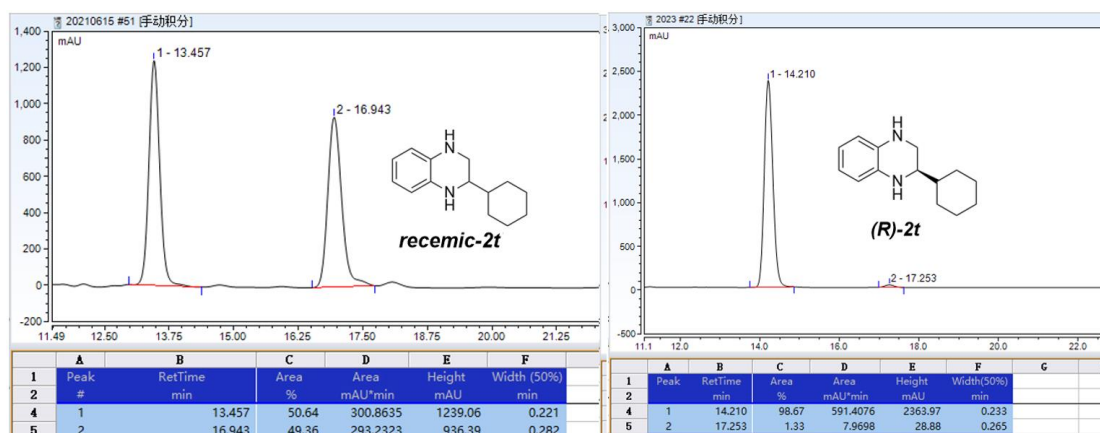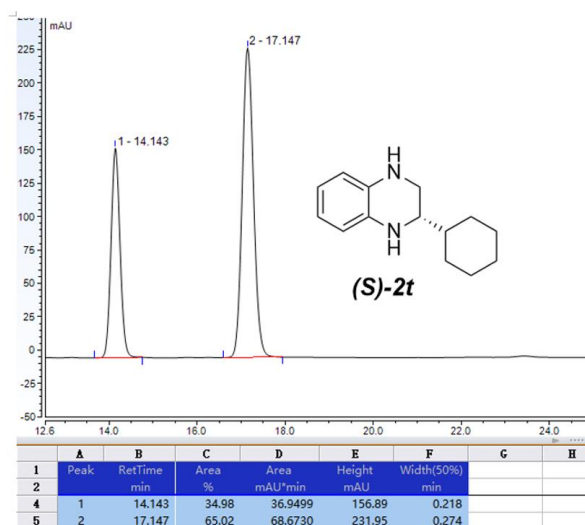

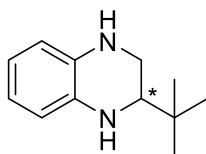

**(*R/S*)-2-(tert-butyl)-1,2,3,4-tetrahydroquinoxaline (2u)**

Yellow liquid.  $^1\text{H}$  NMR (400 MHz, Chloroform-*d*)  $\delta$  6.64 – 6.47 (m, 4H), 3.40 – 3.30 (m, 1H), 3.19 – 3.09 (m, 2H), 0.98 (s, 9H).  $^{13}\text{C}$  NMR (101 MHz, Chloroform-*d*)  $\delta$  134.65, 133.39, 118.96, 118.31, 114.42, 114.33, 59.09, 42.59, 32.84, 26.10.

$[\alpha]_{\text{D}}^{25} = 12.009$  (*c* 0.1,  $\text{CHCl}_3$ ) for (*R*)-**2u**.  $[\alpha]_{\text{D}}^{25} = -13.675$  (*c* 0.1,  $\text{CHCl}_3$ ) for (*S*)-**2u**.

HRMS (ESI) calcd for  $\text{C}_{12}\text{H}_{19}\text{N}_2^+$  [(*M*+*H*) $^+$ ] 191.1543, found 191.1548.

Daicel Chiralpak OD-H column, isocratic elution: n-hexane/2-propanol 80:20, flow rate 0.5 mL/min, column temp 40 °C, retention time 11.423 min (minor enantiomer), 15.863 min (major enantiomer), 35% *ee* for (*R*)-**2u**, retention time 11.170 min (major enantiomer), 15.943 min (minor enantiomer), 23% *ee* for (*S*)-**2u**.

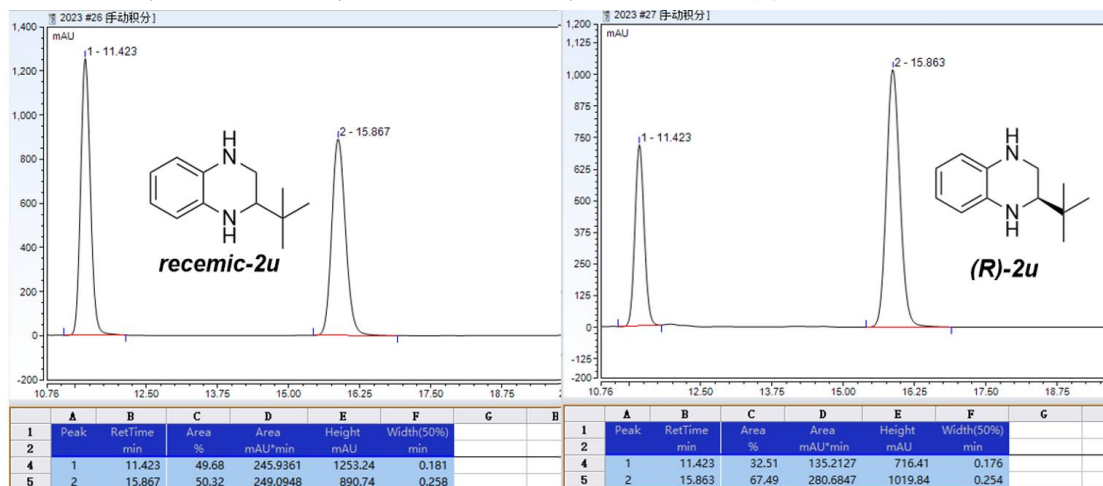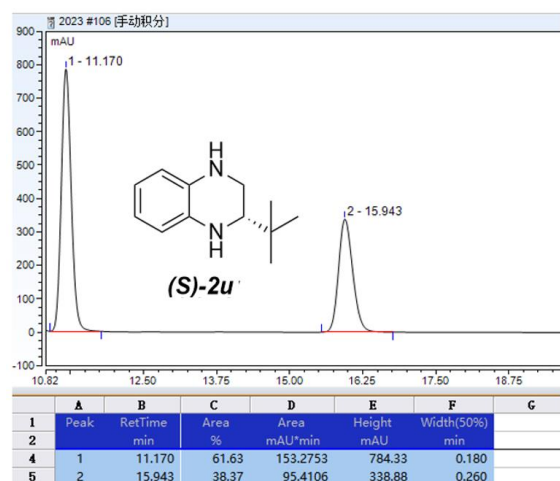

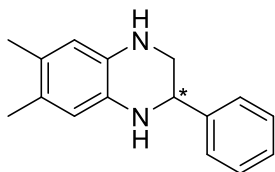

**(R/S)-6,7-dimethyl-2-phenyl-1,2,3,4-tetrahydroquinoxaline (2v)**

White solid.  $^1\text{H}$  NMR (400 MHz, Chloroform- $d$ )  $\delta$  7.40 – 7.25 (m, 5H), 6.38 (d,  $J$  = 2.6 Hz, 2H), 4.42 (dd,  $J$  = 8.2, 3.0 Hz, 1H), 3.39 (dd,  $J$  = 11.1, 3.0 Hz, 1H), 3.26 (dd,  $J$  = 11.2, 8.3 Hz, 1H), 2.12 (s, 6H).  $^{13}\text{C}$  NMR (101 MHz, Chloroform- $d$ )  $\delta$  142.25, 132.16, 130.60, 128.69, 127.88, 127.08, 126.96, 126.55, 116.78, 116.24, 55.16, 49.60, 19.04 (d,  $J$  = 2.3 Hz).

$[\alpha]_{\text{D}}^{25}$  = -31.990 ( $c$  0.1,  $\text{CHCl}_3$ ) for (**R**)-**2v**.  $[\alpha]_{\text{D}}^{25}$  = 36.350 ( $c$  0.1,  $\text{CHCl}_3$ ) for (**S**)-**2v**.

HRMS (ESI) calcd for  $\text{C}_{16}\text{H}_{18}\text{N}_2^+$  [(M+H) $^+$ ] 238.1470, found 238.1475.

Daicel Chiralpak OD-H column, isocratic elution: n-hexane/2-propanol 80:20, flow rate 1 mL/min, column temp 40 °C, retention times 9.793 min (major enantiomer), 12.807 min (minor enantiomer), 95% *ee* for (**R**)-**2v**, retention times 9.620 min (minor enantiomer), 12.507 min (major enantiomer), 88% *ee* for (**S**)-**2v**.

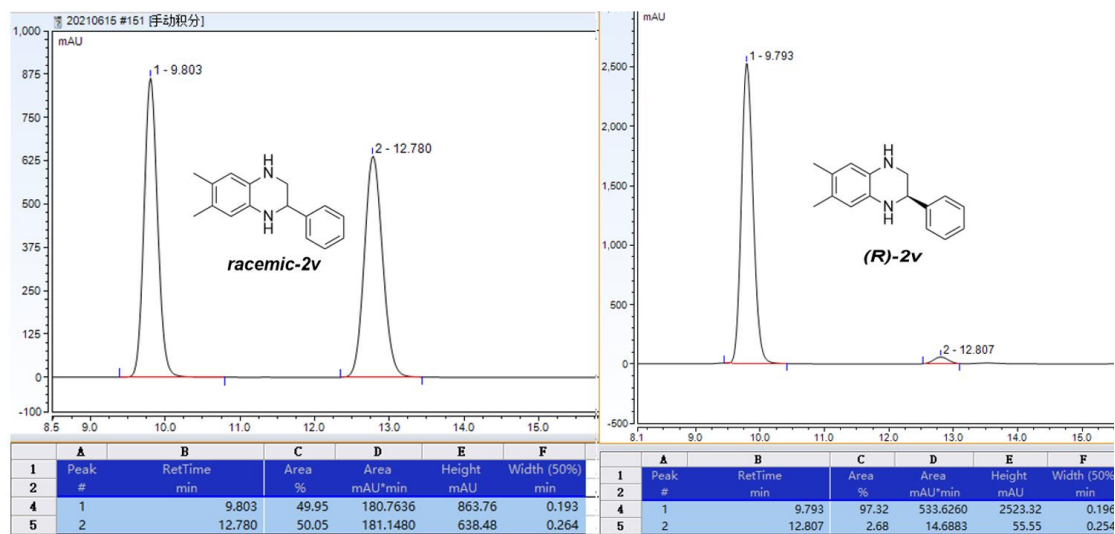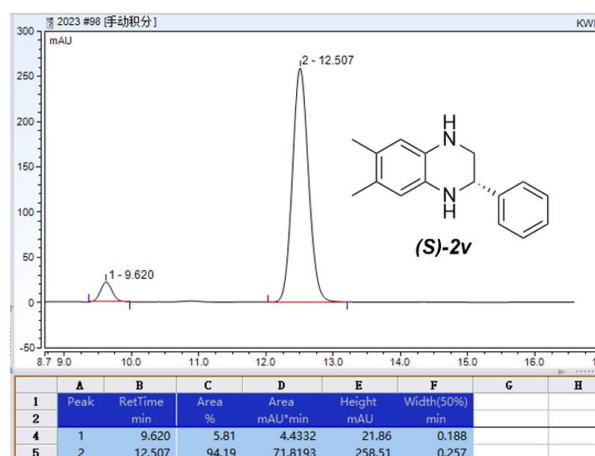

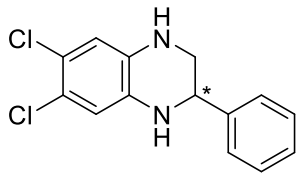

**(*R/S*)-6,7-dichloro-2-phenyl-1,2,3,4-tetrahydroquinoxaline (2w)**

Yellow solid.  $^1\text{H}$  NMR (400 MHz, Chloroform-*d*)  $\delta$  7.39 (m, 5H), 6.63 (d,  $J = 3.8$  Hz, 2H), 4.47 (dd,  $J = 7.9, 3.2$  Hz, 1H), 4.01 (s, 1H), 3.48 (dd,  $J = 11.0, 3.3$  Hz, 1H), 3.31 (dd,  $J = 11.3, 7.9$  Hz, 1H).  $^{13}\text{C}$  NMR (101 MHz, Chloroform-*d*)  $\delta$  141.05, 133.73, 132.62, 128.85, 128.26, 126.95, 120.63, 114.96, 114.84, 54.32, 48.51.

$[\alpha]_{\text{D}}^{25} = -56.024$  ( $c$  0.1,  $\text{CHCl}_3$ ) for (*R*)-**2w**.  $[\alpha]_{\text{D}}^{25} = 82.036$  ( $c$  0.1,  $\text{CHCl}_3$ ) for (*S*)-**2w**.

HRMS (ESI) calcd for  $\text{C}_{14}\text{H}_{12}\text{Cl}_2\text{N}_2^+ [(\text{M}+\text{H})^+]$  278.0378, found 278.0374.

Daicel Chiralpak OD-H column, isocratic elution: n-hexane/2-propanol 80:20, flow rate 1 mL/min, column temp 40 °C, retention times 12.147 min (major enantiomer), 14.720 min (minor enantiomer), 98% *ee* for (*R*)-**2w**, retention times 11.293 min (minor enantiomer), 15.040 min (major enantiomer), 84% *ee* for (*S*)-**2w**.

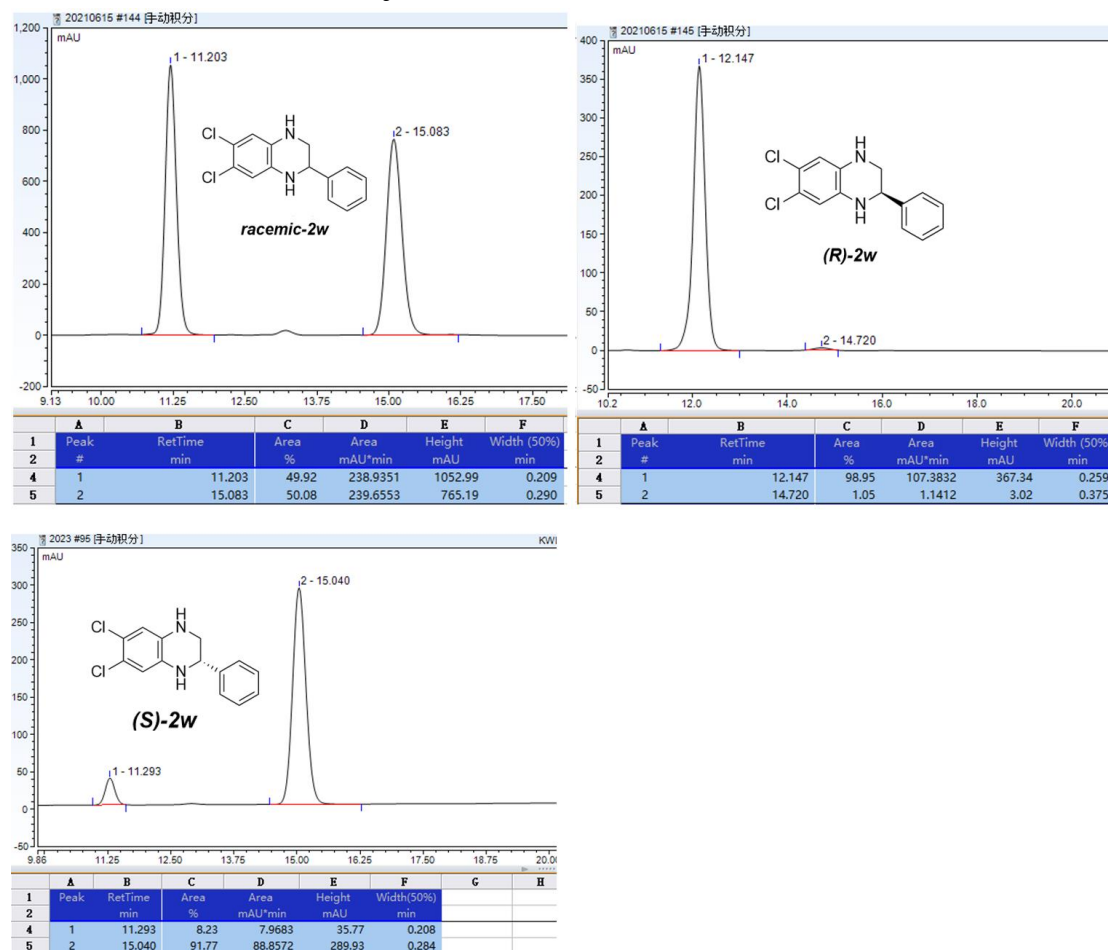

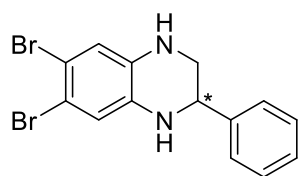

**(*R/S*)-6,7-dibromo-2-phenyl-1,2,3,4-tetrahydroquinoxaline (2x)**

Yellow solid.  $^1\text{H}$  NMR (400 MHz, Chloroform-*d*)  $\delta$  7.41 – 7.26 (m, 5H), 6.74 (d,  $J$  = 4.5 Hz, 2H), 4.41 (dd,  $J$  = 7.9, 3.2 Hz, 1H), 3.43 (dd,  $J$  = 11.2, 3.2 Hz, 1H), 3.24 (dd,  $J$  = 11.2, 7.9 Hz, 1H).  $^{13}\text{C}$  NMR (101 MHz, Chloroform-*d*)  $\delta$  141.11, 134.66, 133.54, 128.97, 128.38, 127.06, 118.01, 117.90, 116.80, 111.76, 54.33, 48.52.

$[\alpha]_{\text{D}}^{25} = -48.359$  ( $c$  0.1,  $\text{CHCl}_3$ ) for (*R*)-**2x**.  $[\alpha]_{\text{D}}^{25} = 19.681$  ( $c$  0.1,  $\text{CHCl}_3$ ) for (*S*)-**2x**.

HRMS (ESI) calcd for  $\text{C}_{14}\text{H}_{12}\text{Br}_2\text{N}_2^+$  [(*M*+*H*) $^+$ ] 365.9367, found 365.9362.

Daicel Chiralpak OZ-H column, isocratic elution: *n*-hexane/2-propanol 90:10, flow rate 0.6 mL/min, column temp 40 °C, retention time 13.493 min (major enantiomer), 17.367 min (minor enantiomer), 87% *ee* for (*R*)-**2x**, retention time 13.390 min (minor enantiomer), 17.183 min (major enantiomer), 57% *ee* for (*S*)-**2x**.

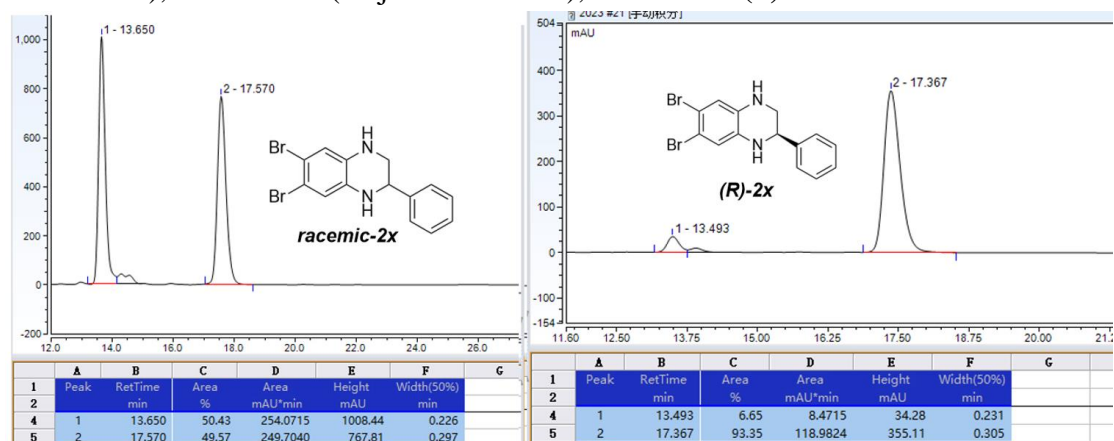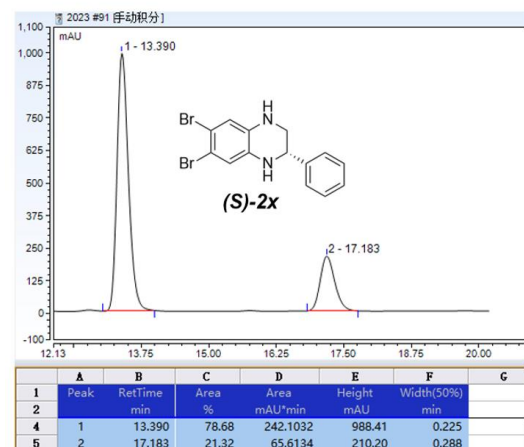



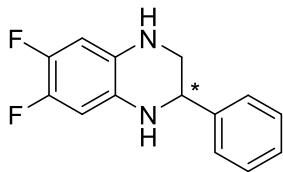

**(*R/S*)-6,7-difluoro-2-phenyl-1,2,3,4-tetrahydroquinoxaline (2y)**

Yellow solid.  $^1\text{H}$  NMR (400 MHz, Chloroform-*d*)  $\delta$  7.34 (m, 5H), 6.40 – 6.31 (m, 2H), 4.39 (dt,  $J = 8.2, 2.4$  Hz, 1H), 3.76 (m, 2H), 3.41 (dt,  $J = 11.3, 2.5$  Hz, 1H), 3.26 (ddd,  $J = 10.6, 8.1, 1.7$  Hz, 1H).  $^{13}\text{C}$  NMR (101 MHz, Chloroform-*d*)  $\delta$  144.49 (dd,  $J = 16.2, 10.3$  Hz), 142.12 (dd,  $J = 16.2, 11.0$  Hz), 141.29, 130.21 – 129.80 (m), 128.81, 128.76 – 128.30 (m), 128.17, 127.97, 126.99, 103.05 (dd,  $J = 38.5, 20.5$  Hz), 54.52, 48.87.

$[\alpha]_{\text{D}}^{25} = -52.704$  ( $c$  0.1,  $\text{CHCl}_3$ ) for (*R*)-**2y**.  $[\alpha]_{\text{D}}^{25} = 63.367$  ( $c$  0.1,  $\text{CHCl}_3$ ) for (*S*)-**2y**.

HRMS (ESI) calcd for  $\text{C}_{14}\text{H}_{12}\text{F}_2\text{N}_2^+$  [(*M*+*H*) $^+$ ] 246.0969, found 246.0965.

Daicel Chiralpak OZ-H column, isocratic elution: *n*-hexane/2-propanol 90:10, flow rate 0.6 mL/min, column temp 40 °C, retention time 11.667 min (major enantiomer), 14.647 min (minor enantiomer), 95% *ee* for (*R*)-**2y**, retention time 11.363 min (minor enantiomer), 14.310 min (major enantiomer), 90% *ee* for (*S*)-**2y**.

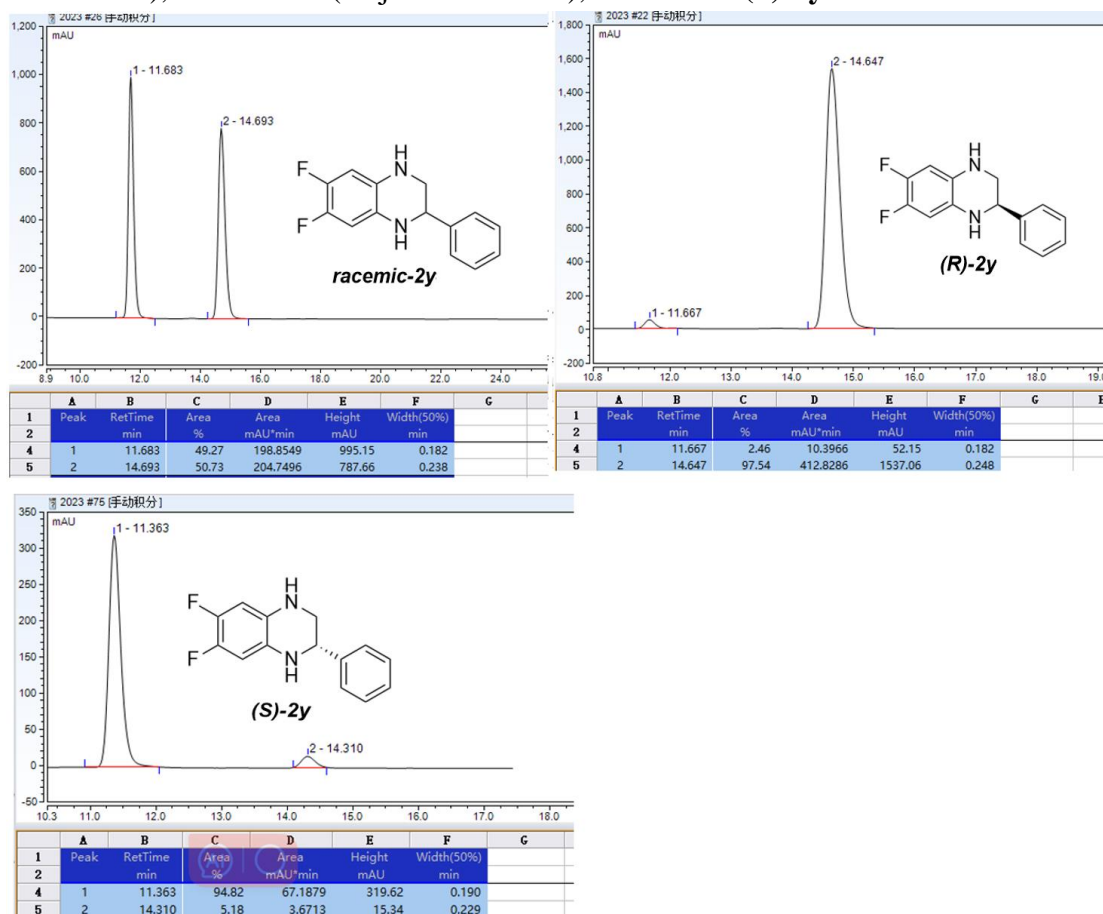



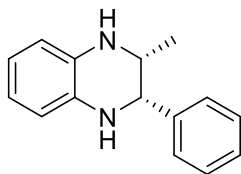

**(2*R*,3*S*)-2-methyl-3-phenyl-1,2,3,4-tetrahydroquinoxaline (4a)<sup>6</sup>**

Yellow solid. <sup>1</sup>H NMR (400 MHz, Chloroform-*d*) δ 7.36 – 7.26 (m, 5H), 6.74 – 6.50 (m, 4H), 4.51 (d, *J* = 3.1 Hz, 1H), 3.72 (qd, *J* = 6.5, 3.0 Hz, 1H), 0.95 (d, *J* = 6.5 Hz, 3H). <sup>13</sup>C NMR (101 MHz, Chloroform-*d*) δ 141.82, 133.33, 132.22, 128.29, 127.65, 127.44, 119.43, 118.44, 115.00, 114.03, 58.55, 49.54, 17.61.

$[\alpha]_D^{25} = -30.847$  (*c* 0.1, CHCl<sub>3</sub>).

HRMS (ESI) calcd for C<sub>15</sub>H<sub>17</sub>N<sub>2</sub><sup>+</sup> [(M+H)<sup>+</sup>] 225.1386, found 225.1389.

Daicel Chiralpak AD-H column, isocratic elution: n-hexane/2-propanol 90:10, flow rate 1 mL/min, column temp 40 °C, retention times 16.683 min (minor enantiomer), 19.407 min (major enantiomer), 91% *ee*.

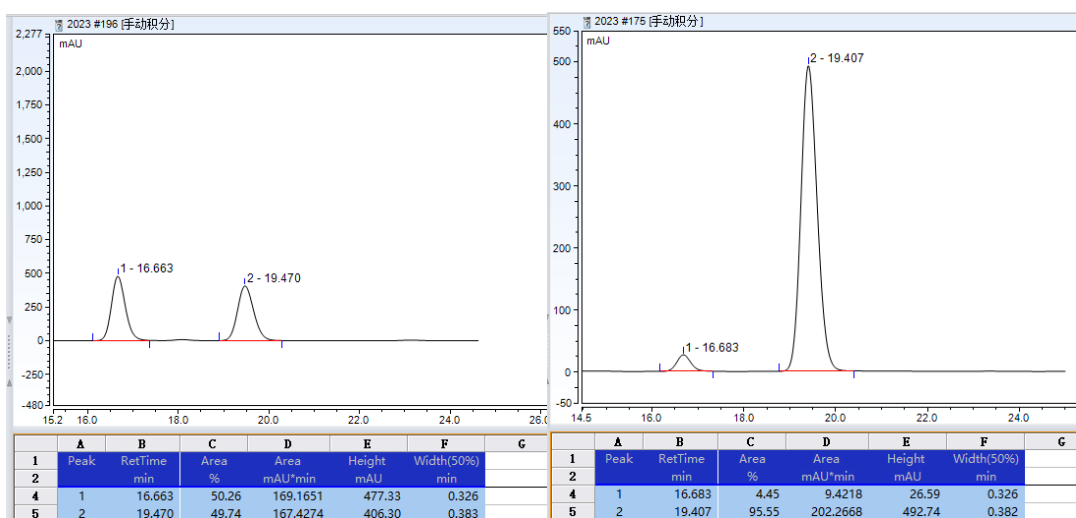

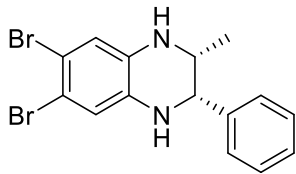

**(2R,3S)-6,7-dibromo-2-methyl-3-phenyl-1,2,3,4-tetrahydroquinoxaline (4b)**

Yellow solid.  $^1\text{H}$  NMR (400 MHz, Chloroform-*d*)  $\delta$  7.30 (m, 2H), 7.23 (m, 2H), 6.79 – 6.71 (m, 2H), 5.29 (d,  $J = 8.5$  Hz, 1H), 4.49 – 4.42 (m, 1H), 3.67 (m, 1H).  $^{13}\text{C}$  NMR (101 MHz, Chloroform-*d*)  $\delta$  140.85, 133.69, 132.91, 128.39, 127.74, 127.55, 118.05, 117.28, 112.21, 111.20, 58.12, 49.07, 17.58.

$[\alpha]_{\text{D}}^{25} = -54.506$  ( $c$  0.1,  $\text{CHCl}_3$ ).

HRMS (ESI) calcd for  $\text{C}_{15}\text{H}_{14}\text{Br}_2\text{N}_2^+$  [(M+H) $^+$ ] 379.9524, found 379.9521.

Daicel Chiralpak OD-H column, isocratic elution: n-hexane/2-propanol 95:5, flow rate 0.5 mL/min, column temp 40 °C, retention times 38.613 min (minor enantiomer), 40.163 min (major enantiomer), 94% *ee*.

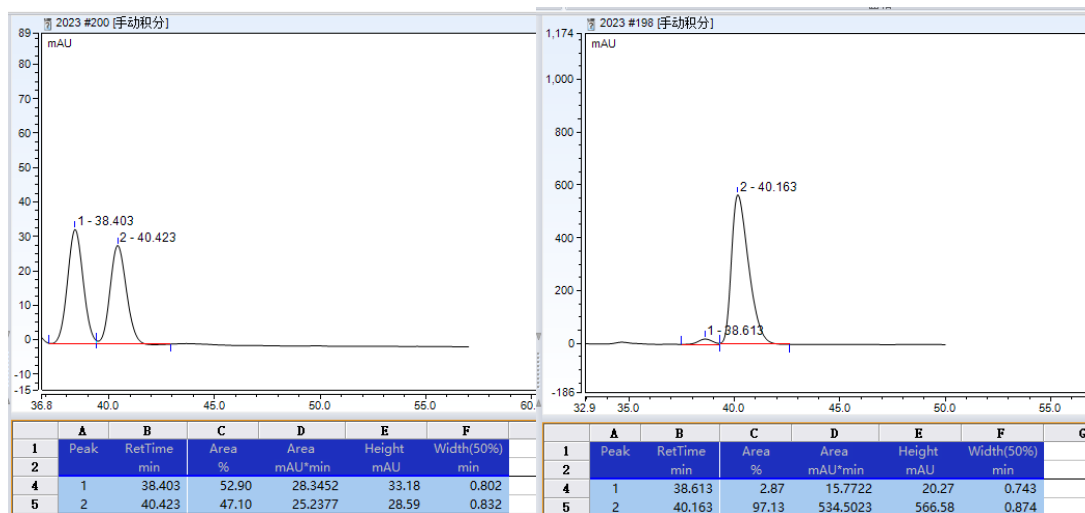

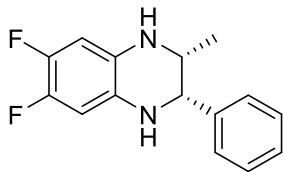

**(2*R*,3*S*)-6,7-difluoro-2-methyl-3-phenyl-1,2,3,4-tetrahydroquinoxaline (4c)**

Yellow solid. <sup>1</sup>H NMR (400 MHz, Chloroform-*d*) δ 7.36 – 7.20 (m, 5H), 6.34 (m, 2H), 4.45 – 4.41 (m, 1H), 3.64 (m, 1H), 0.92 (dd, *J* = 6.6, 1.6 Hz, 3H). <sup>13</sup>C NMR (101 MHz, Chloroform-*d*) δ 144.89 (d, *J* = 13.1 Hz), 144.21 (d, *J* = 13.3 Hz), 142.55 (d, *J* = 12.9 Hz), 141.87 (d, *J* = 13.2 Hz), 141.25, 129.10 (d, *J* = 8.3 Hz), 128.39, 128.02 (d, *J* = 8.0 Hz), 127.60 (d, *J* = 9.5 Hz), 103.35 (d, *J* = 20.9 Hz), 102.31 (d, *J* = 21.3 Hz), 58.24, 49.41, 17.48.

$[\alpha]_D^{25} = -26.672$  (*c* 0.1, CHCl<sub>3</sub>).

HRMS (ESI) calcd for C<sub>15</sub>H<sub>14</sub>F<sub>2</sub>N<sub>2</sub><sup>+</sup> [(M+H)<sup>+</sup>] 260.1125, found 260.1127.

Daicel Chiralpak OD-H column, isocratic elution: n-hexane/2-propanol 95:5, flow rate 0.5 mL/min, column temp 40 °C, retention times 20.590 min (major enantiomer), 24.090 min (minor enantiomer), 90% *ee*.

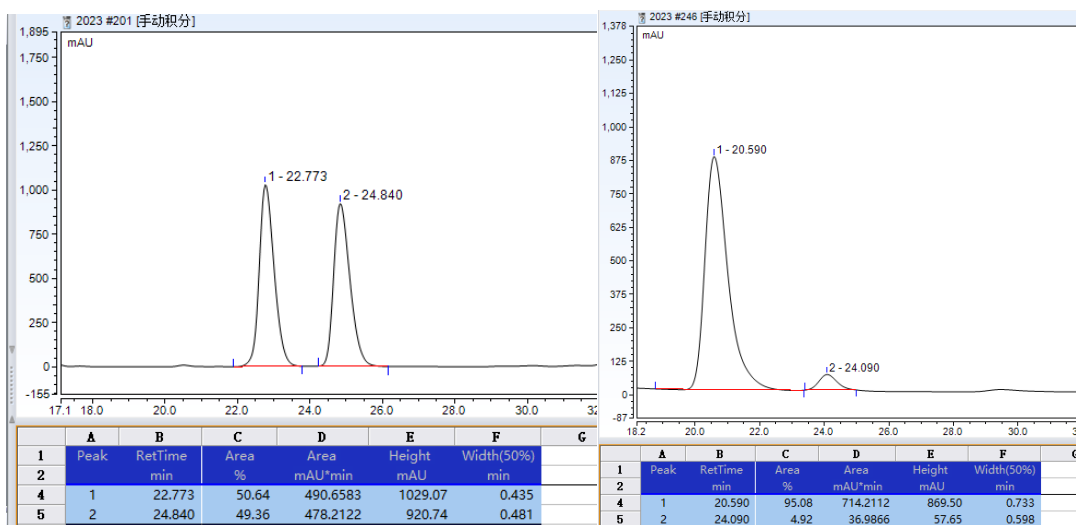

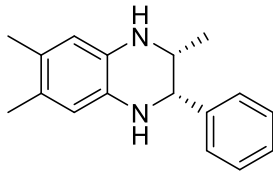

**(2R,3S)-2,6,7-trimethyl-3-phenyl-1,2,3,4-tetrahydroquinoxaline(4d)**

Yellow solid.  $^1\text{H}$  NMR (400 MHz, Chloroform-*d*)  $\delta$  7.42 – 7.26 (m, 5H), 6.45 (d,  $J$  = 9.0 Hz, 2H), 4.52 (d,  $J$  = 3.1 Hz, 1H), 3.71 (m, 1H), 2.18 (s, 6H), 0.98 (d,  $J$  = 6.5 Hz, 3H).  $^{13}\text{C}$  NMR (101 MHz, Chloroform-*d*)  $\delta$  142.03, 131.21, 129.93, 128.25, 127.62, 127.34, 126.20, 116.90, 115.76, 58.73, 49.90, 19.09, 19.01, 17.43.

$[\alpha]_{\text{D}}^{25} = -28.670$  ( $c$  0.1,  $\text{CHCl}_3$ ).

HRMS (ESI) calcd for  $\text{C}_{17}\text{H}_{21}\text{N}_2^+$  [(M+H) $^+$ ] 253.1699, found 253.1697.

Daicel Chiralpak OD-H column, isocratic elution: n-hexane/2-propanol 90:10, flow rate 1 mL/min, column temp 40 °C, retention times 12.710 min (major enantiomer), 14.387 min (minor enantiomer), 92% *ee*.

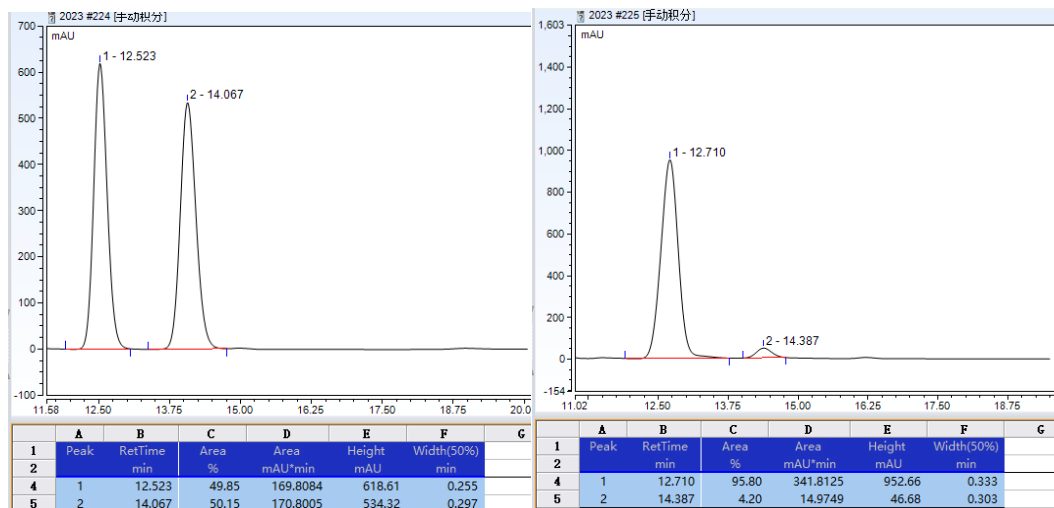

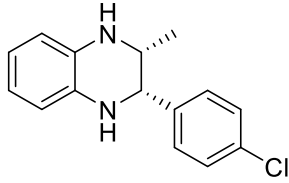

**(2*S*,3*R*)-2-(4-chlorophenyl)-3-methyl-1,2,3,4-tetrahydroquinoxaline (4e)**

Yellow solid.  $^1\text{H}$  NMR (400 MHz, Chloroform-*d*)  $\delta$  7.29 – 7.19 (m, 4H), 6.62 (, 4H), 4.47 (d,  $J = 3.1$  Hz, 1H), 3.75 – 3.63 (m, 1H), 0.93 (d,  $J = 6.5$  Hz, 3H).  $^{13}\text{C}$  NMR (101 MHz, Chloroform-*d*)  $\delta$  140.34, 133.17, 132.93, 132.05, 129.05, 128.37, 119.62, 118.54, 115.02, 114.03, 58.09, 49.19, 17.64.

$[\alpha]_{\text{D}}^{25} = -44.350$  (c 0.1,  $\text{CHCl}_3$ ).

HRMS (ESI) calcd for  $\text{C}_{15}\text{H}_{16}\text{ClN}_2^+$  [(M+H) $^+$ ] 259.0997, found 259.0994.

Daicel Chiralpak OD-H column, isocratic elution: n-hexane/2-propanol 85:5, flow rate 1 mL/min, column temp 40 °C, retention times 18.437 min (minor enantiomer), 23.750 min (major enantiomer), 90% *ee*.

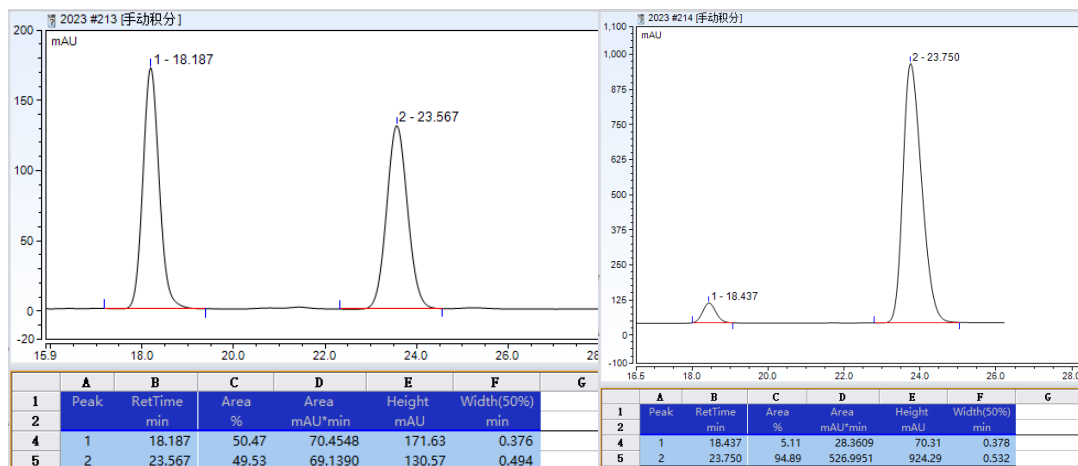

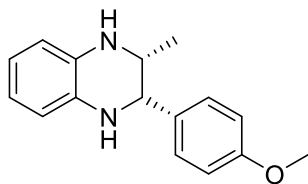

**(2*S*,3*R*)-2-(4-methoxyphenyl)-3-methyl-1,2,3,4-tetrahydroquinoxaline (4f)**

Yellow solid. <sup>1</sup>H NMR (400 MHz, Chloroform-*d*) δ 7.26 (dd, *J* = 8.5, 1.8 Hz, 2H), 6.90 (dd, *J* = 8.6, 1.8 Hz, 2H), 6.74 – 6.56 (m, 4H), 4.50 (dd, *J* = 3.1, 1.7 Hz, 1H), 3.84 (d, *J* = 1.7 Hz, 3H), 3.78 – 3.69 (m, 1H), 0.99 (dd, *J* = 6.5, 1.6 Hz, 3H). <sup>13</sup>C NMR (101 MHz, Chloroform-*d*) δ 158.95, 134.08, 133.31, 132.52, 128.71, 119.25, 118.36, 114.80, 113.99, 113.63, 58.02, 55.33, 49.63, 17.75.

$[\alpha]_D^{25} = -48.261$  (*c* 0.1, CHCl<sub>3</sub>).

HRMS (ESI) calcd for C<sub>16</sub>H<sub>18</sub>N<sub>2</sub>O<sup>+</sup> [(M+H)<sup>+</sup>] 255.1492, found 255.1497.

Daicel Chiralpak OD-H column, isocratic elution: n-hexane/2-propanol 90:10, flow rate 1 mL/min, column temp 40 °C, retention times 19.517 min (minor enantiomer), 23.103 min (major enantiomer), 92% *ee*.

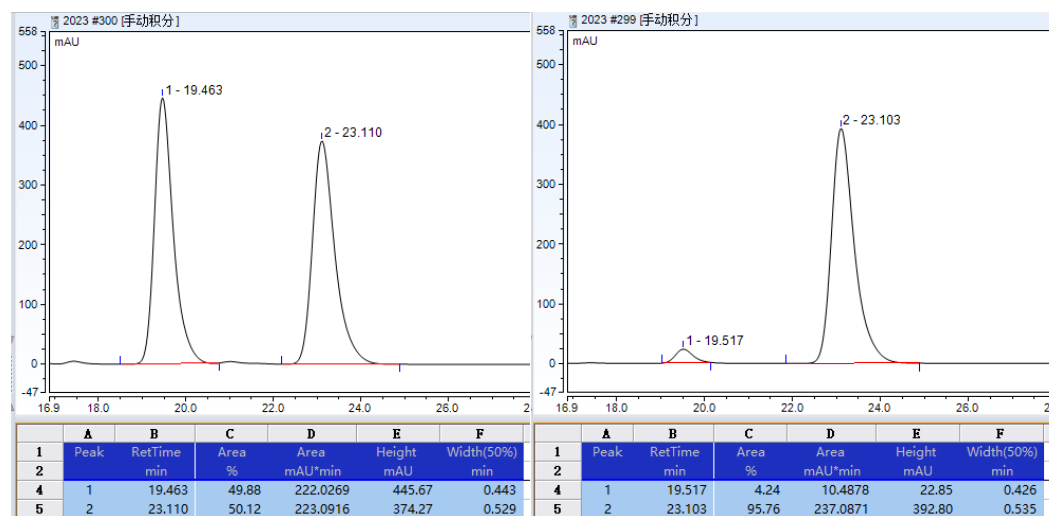

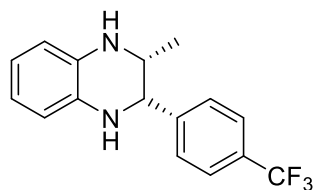

**(2*R*,3*S*)-2-methyl-3-(4-(trifluoromethyl)phenyl)-1,2,3,4-tetrahydroquinoxaline (4g)**

Yellow solid.  $^1\text{H}$  NMR (400 MHz, Chloroform-*d*)  $\delta$  7.60 (d,  $J$  = 8.0 Hz, 2H), 7.43 (d,  $J$  = 8.0 Hz, 2H), 6.66 (m, 4H), 4.60 – 4.55 (m, 1H), 3.78 (t,  $J$  = 5.0 Hz, 1H), 0.98 (d,  $J$  = 6.5 Hz, 3H).  $^{13}\text{C}$  NMR (101 MHz, Chloroform-*d*)  $\delta$  145.97, 132.65, 132.36, 128.10, 125.13 (q,  $J$  = 3.8 Hz), 119.56, 118.65, 114.88, 114.02, 58.53, 49.00, 17.86.

$[\alpha]_{\text{D}}^{25} = -26.093$  ( $c$  0.1,  $\text{CHCl}_3$ ).

HRMS (ESI) calcd for  $\text{C}_{16}\text{H}_{16}\text{F}_3\text{N}_2^+$  [(M+H) $^+$ ] 293.1260, found 293.1263.

Daicel Chiralpak AD-H column, isocratic elution: n-hexane/2-propanol 90:10, flow rate 0.7 mL/min, column temp 40 °C, retention times 10.947 min (major enantiomer), 13.127 min (minor enantiomer), 70% *ee*.

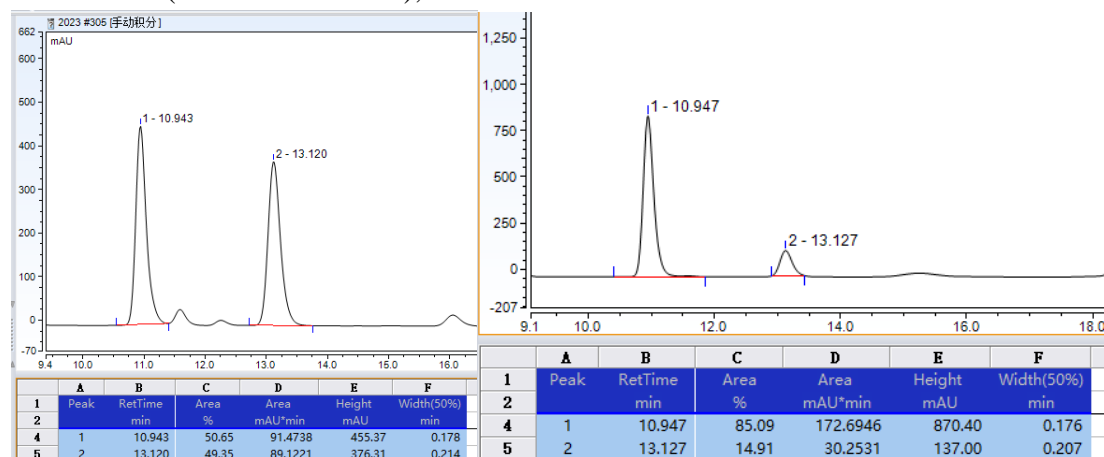

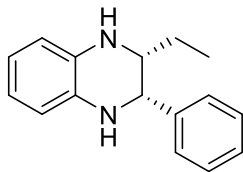

**(2R,3S)-2-ethyl-3-phenyl-1,2,3,4-tetrahydroquinoxaline (4h)**

Yellow solid.  $^1\text{H}$  NMR (400 MHz, Chloroform-*d*)  $\delta$  7.36 – 7.28 (m, 6H), 6.74 – 6.55 (m, 4H), 4.61 (t,  $J = 2.7$  Hz, 1H), 3.48 (t,  $J = 3.0$  Hz, 1H), 1.35 – 1.22 (m, 2H), 0.96 (t,  $J = 7.5$  Hz, 3H).  $^{13}\text{C}$  NMR (101 MHz, Chloroform-*d*)  $\delta$  141.99, 133.43, 132.31, 128.30, 127.64, 127.40, 119.30, 118.40, 114.80, 114.05, 57.86, 55.72, 23.80, 10.59.

$[\alpha]_{\text{D}}^{25} = -20.582$  ( $c$  0.1,  $\text{CHCl}_3$ ).

HRMS (ESI) calcd for  $\text{C}_{16}\text{H}_{19}\text{N}_2^+$  [(M+H) $^+$ ] 239.1543, found 239.1546.

Daicel Chiralpak OD-H column, isocratic elution: n-hexane/2-propanol 95:5, flow rate 0.5 mL/min, column temp 40 °C, retention times 43.157 min (minor enantiomer), 45.550 min (major enantiomer), 80% *ee*.

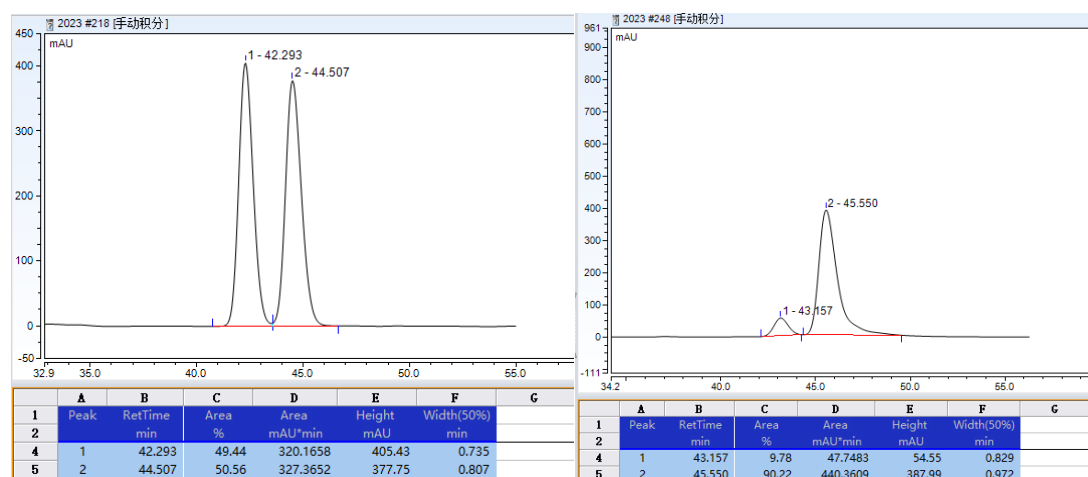



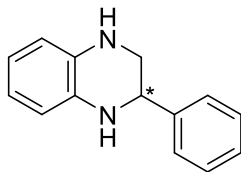

**(*R/S*)-2-phenyl-1,2,3,4-tetrahydroquinoline (6a)<sup>1</sup>**

Yellow solid. <sup>1</sup>H NMR (400 MHz, Chloroform-d) δ 7.48 – 7.30 (m, 5H), 6.73 – 6.66 (m, 2H), 6.66 – 6.60 (m, 2H), 4.53 (dd, *J* = 8.2, 3.1 Hz, 1H), 3.51 (dd, *J* = 11.1, 3.1 Hz, 1H), 3.37 (dd, *J* = 11.0, 8.2 Hz, 1H). <sup>13</sup>C NMR (101 MHz, Chloroform-d) δ 141.92, 134.22, 132.89, 128.74, 127.99, 127.09, 119.00, 118.87, 114.81, 114.52, 54.79, 49.22.

[α]<sub>D</sub><sup>25</sup> = -82.423 (*c* 0.1, CHCl<sub>3</sub>) for (*R*)-6a. [α]<sub>D</sub><sup>25</sup> = 78.134 (*c* 0.1, CHCl<sub>3</sub>) for (*S*)-6a.

HRMS (ESI) calcd for C<sub>14</sub>H<sub>14</sub>N<sub>2</sub><sup>+</sup> [(M+H)<sup>+</sup>] 211.1230, found 211.1231.

Daicel Chiralpak OD-H column, isocratic elution: n-hexane/2-propanol 90:10, flow rate 1 mL/min, column temp 40 °C, retention times 16.317 min (major enantiomer), 23.377 min (minor enantiomer), 90% *ee* for (*R*)-6a, retention times 17.057 min (minor enantiomer), 22.670 min (major enantiomer), 87% *ee* for (*S*)-6a.

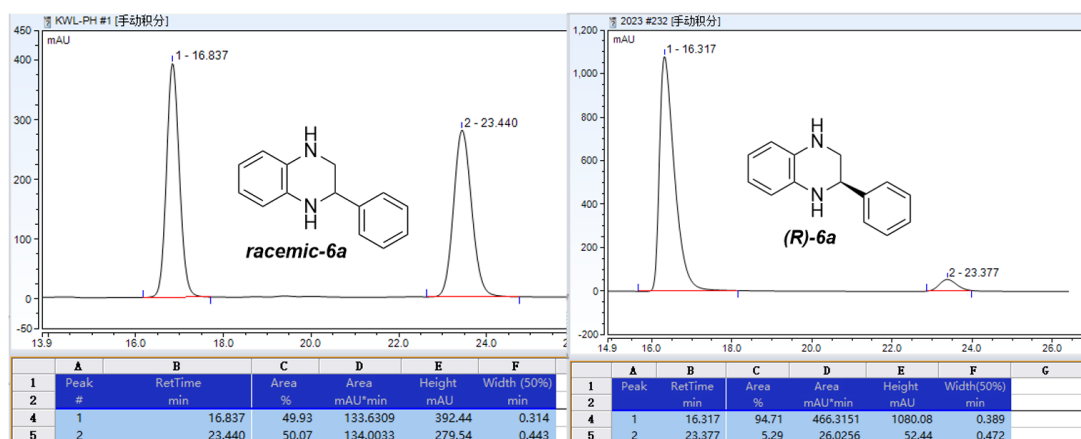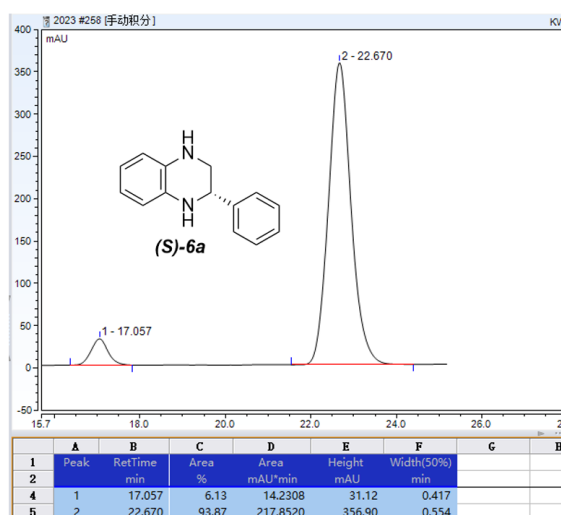

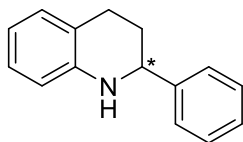

**(*R/S*)-2-phenyl-1,2,3,4-tetrahydroquinoline (6b)<sup>7</sup>**

White solid. <sup>1</sup>H NMR (400 MHz, Chloroform-*d*) δ 7.42 – 7.27 (m, 5H), 7.02 (t, *J* = 7.3 Hz, 2H), 6.66 (td, *J* = 7.4, 1.1 Hz, 1H), 6.58 – 6.52 (m, 1H), 4.45 (dd, *J* = 9.3, 3.3 Hz, 1H), 4.05 (s, 1H), 2.93 (m, 1H), 2.74 (m, 1H), 2.24 – 2.08 (m, 1H), 2.08 – 1.91 (m, 1H); <sup>13</sup>C NMR (101 MHz, Chloroform-*d*) δ 144.92, 144.85, 129.43, 128.70, 127.57, 127.03, 126.67, 121.01, 117.28, 114.10, 56.38, 31.10, 26.51. HRMS (ESI+) *m/z* [M+H]: calcd. 210.1277, found 210.1272. [α]<sub>D</sub><sup>25</sup> = -54.719 (*c* = 0.100 in CHCl<sub>3</sub>).

[α]<sub>D</sub><sup>25</sup> = -52.069 (*c* 0.1, CHCl<sub>3</sub>) for (*R*)-**6d**. [α]<sub>D</sub><sup>25</sup> = 45.273 (*c* 0.1, CHCl<sub>3</sub>) for (*S*)-**6d**.

HRMS (ESI) calcd for C<sub>15</sub>H<sub>15</sub>N<sup>+</sup> [(M+H)<sup>+</sup>] 209.1204, found 209.1205.

Daicel Chiralpak OD-H column, isocratic elution: n-hexane/2-propanol 80:20, flow rate 0.6 mL/min, column temp 40 °C, retention times 12.727 min (major enantiomer), 16.017 min (minor enantiomer), 80% *ee* for (*R*)-**6d**, retention times 12.567 min (minor enantiomer), 15.947 min (major enantiomer), 87% *ee* for (*S*)-**6d**.

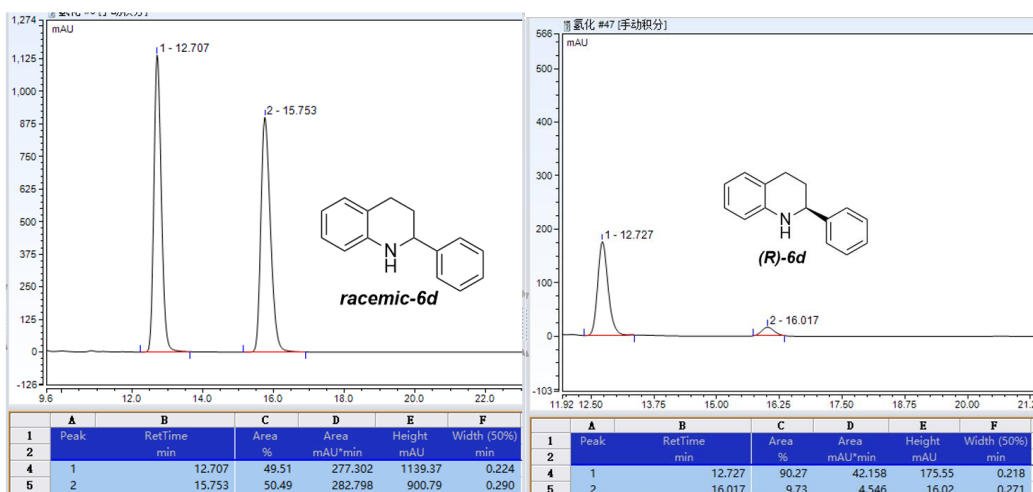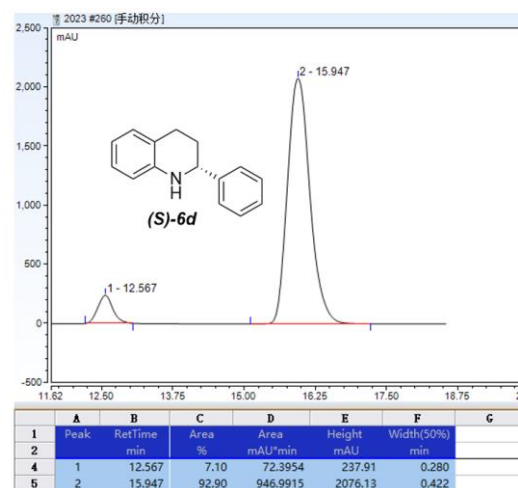

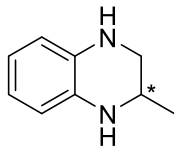

**(S)-2-methyl-1,2,3,4-tetrahydroquinoline(6c)**

Yellow solid.  $^1\text{H NMR}$  (400 MHz, Chloroform-*d*)  $\delta$  6.60 (dd,  $J = 5.8, 3.4$  Hz, 2H), 6.52 (dd,  $J = 6.1, 3.2$  Hz, 2H), 3.51 (m, 1H), 3.39 (s, 2H), 3.32 (dd,  $J = 10.8, 3.0$  Hz, 1H), 3.04 (dd,  $J = 10.7, 8.2$  Hz, 1H), 1.19 (d,  $J = 6.3$  Hz, 3H).  $^{13}\text{C NMR}$  (101 MHz,  $\text{CDCl}_3$ )  $\delta$  133.65, 133.26, 118.78, 114.52, 48.31, 45.78, 19.98.

$[\alpha]_{\text{D}}^{25} = -13.3$  ( $c$  0.1,  $\text{CHCl}_3$ ) for (**R**)-**6g**.  $[\alpha]_{\text{D}}^{25} = 10.121$  ( $c$  0.1,  $\text{CHCl}_3$ ) for (**S**)-**6g**.

HRMS (ESI) calcd for  $\text{C}_9\text{H}_{13}\text{N}_2^+$  [(M+H) $^+$ ] 149.1073, found 149.1070.

Daicel Chiralpak OD-H column, isocratic elution: n-hexane/2-propanol 80:20, flow rate 0.5 mL/min, column temp 40 °C, retention times 15.897 min (minor enantiomer), 18.617 min (major enantiomer), 23% *ee* for (**S**)-**6d**, retention times 19. min (minor enantiomer), 15.947 min (major enantiomer), 87% *ee* for (**S**)-**6d**.

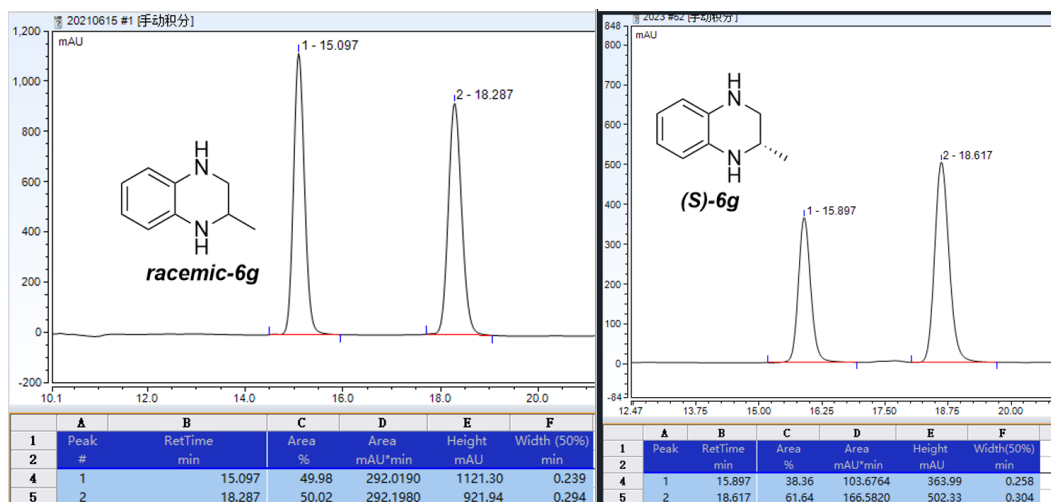

## 10. Supporting references

- 1 Q.-A. Chen; D.-S. Wang; Y.-G. Zhou; Y. Duan; H.-J. Fan; Y. Yang; Z. Zhang, Convergent Asymmetric Disproportionation Reactions: Metal/Brønsted Acid Relay Catalysis for Enantioselective Reduction of Quinoxalines, *J. Am. Chem. Soc.*, **2011**, *133* (16), 6126-6129.
- 2 F. Shi; W. Tan; H. H. Zhang; M. Li; Q. Ye; G. H. Ma; S. J. Tu; G. Li, Asymmetric Organocatalytic Tandem Cyclization/Transfer Hydrogenation: A Synthetic Strategy for Enantioenriched Nitrogen Heterocycles, *Advanced Synthesis & Catalysis*, **2013**, *355* (18), 3715-3726.
- 3 D. Cartigny; T. Nagano; T. Ayad; J. P. Genêt; T. Ohshima; K. Mashima; V. Ratovelomanana - Vidal, Iridium - Difluorophos - Catalyzed Asymmetric Hydrogenation of 2 - Alkyl - and 2 - Aryl - Substituted Quinoxalines: A General and Efficient Route into Tetrahydroquinoxalines, *Advanced Synthesis & Catalysis*, **2010**, *352* (11-12), 1886-1891.
- 4 Z. Han; X. Feng; H. Du, Asymmetric Transfer Hydrogenation of 2-Substituted Quinoxalines with Regenerable Dihydrophenanthridine, *The Journal of Organic Chemistry*, **2024**, *89* (5), 3666-3671.
- 5 H.-X. Lei; K. Zhang; Y.-X. Qin; R.-J. Dong; D.-Z. Chen; H. Zhou; X.-H. Sheng, A Quantum-Chemical Approach to Develop Tetrahydroquinoxaline as Potent Ferroptosis Inhibitors, *Journal of Molecular Structure*, **2021**, 1228.
- 6 C. Liu; X. Liu; Q. Liu, Stereodivergent Asymmetric Hydrogenation of Quinoxalines, *Chem*, **2023**, *9* (9), 2585-2600.
- 7 Z. Han; G. Liu; X. Yang; X.-Q. Dong; X. Zhang, Enantiodivergent Synthesis of Chiral Tetrahydroquinoline Derivatives Via Ir-Catalyzed Asymmetric Hydrogenation: Solvent-Dependent Enantioselective Control and Mechanistic Investigations, *ACS Catal*, **2021**, *11* (12), 7281-7291.

## 11. DFT computational studies

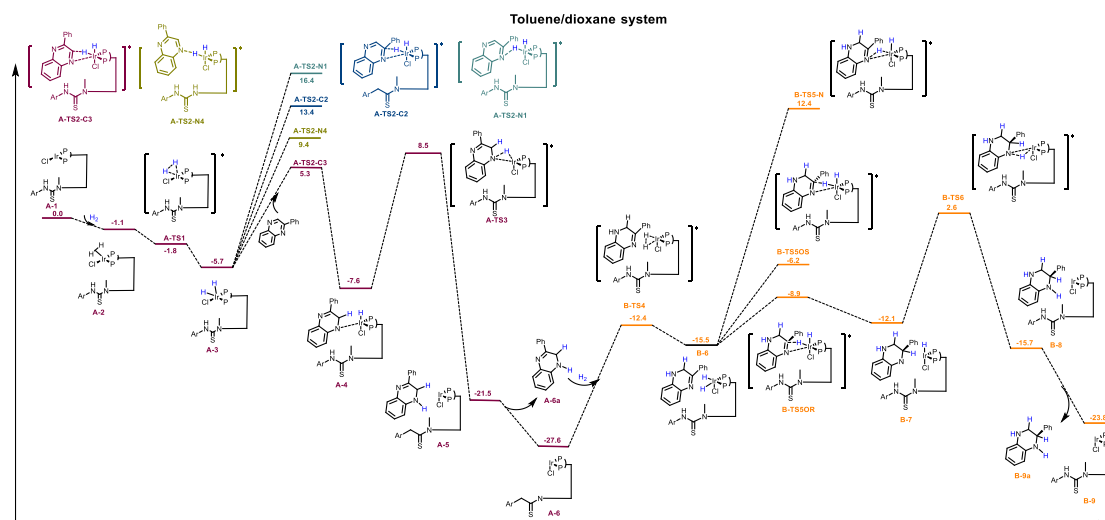

Scheme S2. DFT calculated energy potential surface for the proposed inner-sphere pathway in toluene/dioxane system (Ar=3,5-di-CF<sub>3</sub>Ph; the phenyl groups on the phosphorus atoms are omitted for clarity; the relative Gibbs energies are labeled in kcal·mol<sup>-1</sup>).

### 11.1 Distortion calculation

Absolute distortion energies ( $E_{\text{cat}}$ ), and of the substrate ( $E_{\text{sub}}$ ), as well as electronic energy (EE) for **A-TS5OR** and **A-TS5OS**, **TS5OR-ET** and **TS5OS-ET** were calculated at B3LYP-D3(BJ)/def2-tzvp//B3LYP-D3(BJ)/6-31g\* level of theory and in kcal/mol.

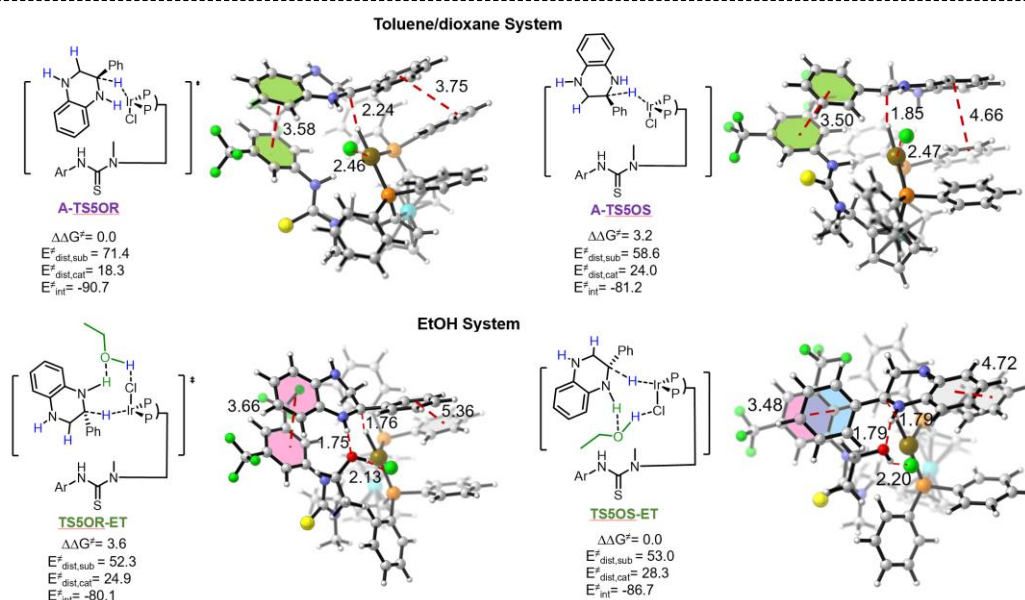

Distortion-interaction analysis method in enantio-determining step for the single-point energy calculations, the relative Gibbs energies are labeled in kcal·mol<sup>-1</sup>.

|     | <b>A-TS5OR</b> | <b>A-TS5OS</b> | <b>TS5OR-ET</b> | <b>TS5OS-ET</b> |
|-----|----------------|----------------|-----------------|-----------------|
| sub | -651.6153034   | -651.6353907   | -651.6456249    | -651.6442523    |
| cat | -5395.104874   | -5395.096697   | -5550.224905    | -5550.219508    |
| EE  | -6046.864721   | -6046.861502   | -6201.998148    | -6202.001996    |

## 11.2 Method for DFT calculation

All quantum chemistry calculations were conducted using Gaussian 16 packages<sup>8</sup> at China National Supercomputing Center in Shenzhen with Density functional theory (DFT) method. B3LYP-D3(BJ) functional was used for optimization of all geometries.<sup>8-9</sup> SDD basis set was used for Ir and Fe,<sup>10</sup> and 6-31g\* basis set was used for other elements.<sup>8, 11</sup> Then frequency calculations (at 298.15 K) were performed on the optimized geometries to confirm the local minimums (without imaginary frequency) and the transition states (with one imaginary frequency).<sup>12</sup> Solvent effect was included employing SMD solvation model as the solvent (solvent=generic, eps=2.34, epsinf=2.05, to the model the solvent mixture Toluene/dioxane=4:1) in mixture system. To gain more accurate energetics, the single-point solvation energies were calculated at B3LYP-D3(BJ)/def2-tzvp level of theory with SMD solvation model as the solvent (solvent=generic, eps=2.34, epsinf=2.05, to the model the solvent mixture Toluene/dioxane=4:1) in mixture system and employing SMD solvation model with ethanol as the solvent in EtOH system.

Table S4. Energetics of Computed Intermediates and TSs.

| Geometries           | E(correction) | E (SCF Done) | G(correction) |
|----------------------|---------------|--------------|---------------|
| <b>A-1</b>           | 0.652008      | -5395.151361 | -5394.499353  |
| <b>H<sub>2</sub></b> | -0.001353     | -1.179184754 | -1.180537754  |
| <b>A-2</b>           | 0.668999      | -5396.350628 | -5395.681629  |
| <b>A-TS1</b>         | 0.667064      | -5396.349755 | -5395.682691  |
| <b>A-3</b>           | 0.670421      | -5396.359427 | -5395.689006  |
| <b>Substrate</b>     | 0.167065      | -649.3266804 | -649.1596154  |
| <b>A-TS2-C3</b>      | 0.863012      | -6045.694007 | -6044.830995  |
| <b>A-TS2-N4</b>      | 0.859572      | -6045.685811 | -6044.826239  |
| <b>A-TS2-N1</b>      | 0.855927      | -6045.669307 | -6044.81338   |
| <b>A-TS2-C2</b>      | 0.860593      | -6045.67881  | -6044.818217  |
| <b>A-4</b>           | 0.864809      | -6045.696927 | -6044.832118  |
| <b>A-TS3</b>         | 0.861012      | -6045.667531 | -6044.806519  |
| <b>A-5</b>           | 0.868631      | -6045.722926 | -6044.854295  |
| <b>A-6</b>           | 0.647341      | -5395.172008 | -5394.524667  |
| <b>A-6a</b>          | 0.188301      | -650.5276533 | -650.3393523  |
| <b>B-TS4</b>         | 0.879589      | -6046.899927 | -6046.020338  |
| <b>B-6</b>           | 0.884915      | -6046.910298 | -6046.025383  |
| <b>A-TS4-2</b>       | 0.883072      | -6046.819385 | -6045.936313  |
| <b>A-TS4-1</b>       | 0.882945      | -6046.885132 | -6046.002187  |
| <b>A-7</b>           | 0.882532      | -6046.915234 | -6046.032702  |
| <b>A-TS4</b>         | 0.882728      | -6046.902872 | -6046.020144  |
| <b>A-8</b>           | 0.885564      | -6046.907301 | -6046.021737  |
| <b>A-9</b>           | 0.886157      | -6046.912429 | -6046.026272  |
| <b>A-TS5OS</b>       | 0.887792      | -6046.897309 | -6046.009517  |
| <b>A-TS5OR</b>       | 0.886999      | -6046.901644 | -6046.014645  |
| <b>A-10</b>          | 0.889114      | -6046.930427 | -6046.041313  |
| <b>A-11</b>          | 0.648983      | -5395.169779 | -5394.520796  |
| <b>A-11a</b>         | 0.212968      | -651.741423  | -651.528455   |
| <b>B-TS5OR</b>       | 0.882431      | -6046.877735 | -6045.995304  |
| <b>B-7</b>           | 0.882431      | -6046.896247 | -6046.013816  |
| <b>B-TS5OS</b>       | 0.88079       | -6046.891332 | -6046.010542  |
| <b>B-TS6</b>         | 0.886816      | -6046.882359 | -6045.995543  |
| <b>B-8</b>           | 0.894122      | -6046.91877  | -6046.024648  |
| <b>B-9</b>           | 0.650539      | -5395.161115 | -5394.510576  |
| <b>B-9a</b>          | 0.213094      | -651.7401446 | -651.5270506  |
| <b>TS5OR-ET</b>      | 0.968197      | -6202.060126 | -6201.091929  |
| <b>TS5OS-ET</b>      | 0.963544      | -6202.061206 | -6201.097662  |

## 11.3 Cartesian coordinates

### H<sub>2</sub>

H 0.00000000 0.00000000 0.37142100  
H 0.00000000 0.00000000 -0.37142100

### Substrate

C -0.44322400 0.30272400 -0.02965300  
C 1.69824200 -0.52374400 0.05682300  
C 2.22620300 0.79648400 -0.07927400  
C 0.10276900 1.61781600 -0.19343300  
H 2.16725700 -2.61222100 0.27859700  
C 2.59134800 -1.61843400 0.17689900  
C 3.62796800 0.99269600 -0.08680900  
H -0.55810400 2.46973900 -0.33268600  
C 4.47272700 -0.08838000 0.03476300  
C 3.95064800 -1.40018900 0.16588100  
H 3.99965600 2.00692600 -0.19179100  
H 5.54867100 0.05930800 0.02964200  
H 4.63485000 -2.23860600 0.25915600  
N 1.39087000 1.86777200 -0.21490900  
N 0.35719200 -0.74618200 0.08049500  
C -1.90484600 0.06821600 -0.00444900  
C -2.40158900 -1.21723300 -0.27453200  
C -2.81535100 1.09479500 0.29138200  
C -3.77029600 -1.46431500 -0.26266600  
H -1.69332200 -2.00872500 -0.49188800  
C -4.18619200 0.84432100 0.30579800  
H -2.45835700 2.08935200 0.53825000  
C -4.66898100 -0.43392800 0.02496200  
H -4.13915500 -2.46277800 -0.48006900  
H -4.87664200 1.64847000 0.54352400  
H -5.73784100 -0.62756600 0.03400700

### Toluene/dioxane system

#### A-1

C -0.96126200 3.87425200 1.73708600  
C -0.69298100 3.96664000 0.34698100  
H -0.69419500 4.87770000 -0.23093000  
C -0.46032800 2.66212800 -0.18108300  
C -0.59018100 1.73409300 0.92824900  
C -0.88366700 2.50863800 2.10478900  
H -1.03002100 2.10895400 3.09611500  
C 1.42246400 -0.30085400 1.26187000  
C 2.15393500 0.75172100 1.82973400  
H 1.71911000 1.73898000 1.91552800

C 3.46175200 0.53894900 2.26589400  
H 4.03496200 1.36852900 2.66695200  
C 4.04586900 -0.72175700 2.15565100  
H 5.07106700 -0.87066400 2.47838600  
C 3.32872100 -1.76945400 1.57641600  
H 3.79642400 -2.73828400 1.43749000  
C 2.02633000 -1.56102300 1.12354600  
H 1.48724800 -2.36858900 0.64430100  
C -1.09320500 -0.70091900 2.48564600  
C -2.22980600 -0.12969300 3.07147400  
H -2.67835900 0.74193800 2.62461600  
C -2.79317500 -0.66982900 4.22561400  
H -3.67740000 -0.20796100 4.65487400  
C -2.24259000 -1.81094400 4.80570600  
H -2.68594500 -2.24041200 5.69926400  
C -1.11974900 -2.40048400 4.22359900  
H -0.67823200 -3.28969200 4.66445500  
C -0.54724100 -1.85039400 3.07799900  
H 0.33466200 -2.31659800 2.65834800  
P -0.36415200 -0.06942000 0.90553300  
Fe -2.34138100 2.74467600 0.63085400  
C -3.73260100 1.38704500 -0.05020000  
C -4.21640200 1.99492700 1.15943100  
H -4.47794200 1.47242500 2.06636700  
C -4.29562900 3.40272700 0.96205000  
C -3.88679500 3.68516800 -0.37380100  
C -3.53364600 2.45177100 -0.99442600  
H -3.15696400 2.33026500 -1.99997500  
C -4.22257100 -1.32775600 0.89159900  
C -5.50945500 -1.00189100 1.34200000  
H -6.02500100 -0.13756900 0.93478800  
C -6.13917700 -1.79588700 2.29944900  
H -7.13343400 -1.53320300 2.65032500  
C -5.49963000 -2.93553600 2.79405000  
H -5.99232700 -3.55365600 3.53944900  
C -4.23354600 -3.28328800 2.32185600  
H -3.73205200 -4.16819900 2.70168000  
C -3.59673500 -2.48300300 1.37437800  
H -2.60313000 -2.72732500 1.01010600  
C -4.52084800 -0.74614900 -1.83464600  
C -4.49590600 -2.06531100 -2.31791400  
H -3.82773400 -2.79271000 -1.86242000  
C -5.32780900 -2.45252200 -3.36544400  
H -5.29628900 -3.47587900 -3.72812400



|    |             |             |             |
|----|-------------|-------------|-------------|
| C  | -6.20064200 | -1.52709800 | -3.94384900 |
| H  | -6.84956800 | -1.82750300 | -4.76137800 |
| C  | -6.23631900 | -0.21799400 | -3.46476700 |
| H  | -6.91751500 | 0.50547300  | -3.90416700 |
| C  | -5.40081400 | 0.17424000  | -2.41578800 |
| H  | -5.45067400 | 1.19216300  | -2.04879500 |
| P  | -3.37851300 | -0.36818700 | -0.43299900 |
| H  | -1.21041400 | 4.69640300  | 2.39454400  |
| H  | -3.80350000 | 4.66611800  | -0.82226000 |
| H  | -4.58570900 | 4.13035500  | 1.70837600  |
| S  | 2.59084700  | 3.18504300  | -0.65515100 |
| N  | 0.90303800  | 1.59828700  | -2.02039200 |
| N  | 2.86083500  | 0.60669700  | -1.49996200 |
| H  | 2.28339200  | -0.21138300 | -1.70791400 |
| F  | 5.68557500  | -3.72248000 | 0.01373100  |
| F  | 5.43822300  | -3.56426100 | -2.14013100 |
| F  | 7.39331800  | -3.23075600 | -1.23469400 |
| F  | 6.77600000  | 1.42341800  | 2.10720300  |
| F  | 7.11140700  | 2.77531700  | 0.43833300  |
| F  | 8.46271100  | 1.09863100  | 0.77256300  |
| C  | -0.29310700 | 2.37443700  | -1.66130500 |
| H  | -1.09591100 | 1.67249900  | -1.91759300 |
| C  | -0.44542600 | 3.64483100  | -2.51264700 |
| H  | 0.36131700  | 4.34912600  | -2.29632800 |
| H  | -1.40844500 | 4.12590000  | -2.31675500 |
| H  | -0.41237400 | 3.39856300  | -3.57672800 |
| C  | 2.12854000  | 1.76293600  | -1.41637800 |
| C  | 4.15723000  | 0.26321000  | -1.11205100 |
| C  | 4.52047700  | -1.07457200 | -1.34838200 |
| H  | 3.81800500  | -1.74099200 | -1.83750400 |
| C  | 5.75222800  | -1.55539500 | -0.92464800 |
| C  | 6.65367400  | -0.72460700 | -0.25799000 |
| H  | 7.60800600  | -1.10356700 | 0.08547400  |
| C  | 6.29331100  | 0.60317000  | -0.04577800 |
| C  | 5.06818000  | 1.11251100  | -0.47364100 |
| H  | 4.79638800  | 2.13717200  | -0.27047000 |
| C  | 6.06907700  | -3.01487400 | -1.08283600 |
| C  | 7.16761100  | 1.47971800  | 0.80429200  |
| Cl | 0.62303700  | -2.12511800 | -1.87279300 |
| Ir | -1.28796200 | -1.01277500 | -0.90625100 |
| C  | 0.79001600  | 0.96350600  | -3.33813200 |
| H  | -0.11444900 | 0.35165600  | -3.36977300 |
| H  | 0.74900600  | 1.72803300  | -4.12488100 |
| H  | 1.64049500  | 0.31846500  | -3.53695000 |

## A-2

|    |             |             |             |
|----|-------------|-------------|-------------|
| C  | -0.91974200 | 3.80654500  | 1.87019900  |
| C  | -0.66478900 | 3.94881500  | 0.48189800  |
| H  | -0.67131800 | 4.88033000  | -0.06242700 |
| C  | -0.43659200 | 2.66362600  | -0.09374000 |
| C  | -0.55853300 | 1.69689000  | 0.98289800  |
| C  | -0.83776700 | 2.42874100  | 2.18798200  |
| H  | -0.97443800 | 1.99375300  | 3.16572800  |
| C  | 1.44984700  | -0.33517000 | 1.26366100  |
| C  | 2.17821300  | 0.69212700  | 1.88062900  |
| H  | 1.74111700  | 1.67421700  | 2.00630900  |
| C  | 3.48474700  | 0.46497400  | 2.31309300  |
| H  | 4.05460200  | 1.27736800  | 2.75268400  |
| C  | 4.07134000  | -0.78960300 | 2.15394200  |
| H  | 5.09476900  | -0.95114300 | 2.47645500  |
| C  | 3.35823600  | -1.81295300 | 1.52900700  |
| H  | 3.82767500  | -2.77505900 | 1.35352800  |
| C  | 2.05732600  | -1.58763400 | 1.07819600  |
| H  | 1.52207800  | -2.37632900 | 0.56456200  |
| C  | -1.06559600 | -0.79289600 | 2.45108300  |
| C  | -2.19844700 | -0.24225000 | 3.06275000  |
| H  | -2.64457300 | 0.64864600  | 2.65320000  |
| C  | -2.76202400 | -0.82639000 | 4.19570600  |
| H  | -3.64355200 | -0.37852400 | 4.64509800  |
| C  | -2.21428000 | -1.99081300 | 4.72969900  |
| H  | -2.65677100 | -2.45362200 | 5.60693700  |
| C  | -1.09423700 | -2.55910800 | 4.12227900  |
| H  | -0.65384200 | -3.46598700 | 4.52688900  |
| C  | -0.52205400 | -1.96527800 | 2.99799700  |
| H  | 0.35837600  | -2.41653600 | 2.55901200  |
| P  | -0.33587900 | -0.10464400 | 0.89122700  |
| Fe | -2.31027500 | 2.71676900  | 0.73837000  |
| C  | -3.71219500 | 1.38459700  | 0.02118900  |
| C  | -4.17600100 | 1.94793400  | 1.26001400  |
| H  | -4.42788700 | 1.39294600  | 2.15019300  |
| C  | -4.25962900 | 3.36170600  | 1.11344300  |
| C  | -3.86553800 | 3.69292700  | -0.21568300 |
| C  | -3.52194200 | 2.48314800  | -0.88534600 |
| H  | -3.15939100 | 2.39817300  | -1.89983800 |
| C  | -4.16808700 | -1.35905300 | 0.88512100  |
| C  | -5.42338900 | -1.03651400 | 1.41854700  |
| H  | -5.94851500 | -0.15036700 | 1.07578300  |
| C  | -6.00940000 | -1.86181900 | 2.37700400  |
| H  | -6.97881600 | -1.60211200 | 2.79325500  |

|   |             |             |             |              |             |             |             |
|---|-------------|-------------|-------------|--------------|-------------|-------------|-------------|
| C | -5.35888600 | -3.02778500 | 2.78924800  | C            | 6.31060300  | 0.60369900  | -0.03740200 |
| H | -5.81772300 | -3.66980600 | 3.53593800  | C            | 5.08429900  | 1.12575600  | -0.44620300 |
| C | -4.12609700 | -3.37120000 | 2.23347000  | H            | 4.81548500  | 2.14545200  | -0.21603500 |
| H | -3.61665800 | -4.27658300 | 2.54869600  | C            | 6.07483000  | -2.98640400 | -1.16519100 |
| C | -3.53235100 | -2.54065800 | 1.28444300  | C            | 7.19112100  | 1.45736600  | 0.82935900  |
| H | -2.56530400 | -2.78497000 | 0.85527800  | Cl           | 0.78661100  | -1.92065600 | -1.89122200 |
| C | -4.64184300 | -0.64916900 | -1.77596200 | H            | -1.97801800 | -2.01644100 | -2.25733500 |
| C | -4.75732900 | -1.95802200 | -2.27313200 | H            | -1.85070900 | -1.23884400 | -2.65332300 |
| H | -4.11719600 | -2.74311100 | -1.88022400 | Ir           | -1.30151100 | -0.99679500 | -1.02754500 |
| C | -5.69689800 | -2.26606500 | -3.25306600 | C            | 0.80994000  | 1.08222900  | -3.31597100 |
| H | -5.77073100 | -3.28335400 | -3.62662800 | H            | -0.09118400 | 0.46966700  | -3.37675100 |
| C | -6.54216400 | -1.27060600 | -3.75115700 | H            | 0.76987000  | 1.87819600  | -4.07109100 |
| H | -7.27318100 | -1.50888800 | -4.51830400 | H            | 1.66360800  | 0.44903100  | -3.53775500 |
| C | -6.44702900 | 0.02622600  | -3.25105600 | <b>A-TS1</b> |             |             |             |
| H | -7.10759500 | 0.80454000  | -3.62290200 | C            | -0.92654100 | 3.81665200  | 1.86021100  |
| C | -5.50636600 | 0.33625600  | -2.26455700 | C            | -0.67276200 | 3.94856600  | 0.47042800  |
| H | -5.45872000 | 1.34646800  | -1.87653300 | H            | -0.68585900 | 4.87524000  | -0.08203300 |
| P | -3.38839000 | -0.35641700 | -0.44419000 | C            | -0.43740000 | 2.65987100  | -0.09416700 |
| H | -1.16279600 | 4.60436500  | 2.55918300  | C            | -0.55091400 | 1.70248300  | 0.99156900  |
| H | -3.78703400 | 4.68945000  | -0.62921800 | C            | -0.83558500 | 2.44220900  | 2.19018800  |
| H | -4.54148400 | 4.06157400  | 1.88881100  | H            | -0.97035600 | 2.01396000  | 3.17132700  |
| S | 2.60757000  | 3.20444500  | -0.55956700 | C            | 1.47482800  | -0.31542500 | 1.28596000  |
| N | 0.91798400  | 1.66364200  | -1.97278000 | C            | 2.20058000  | 0.71359500  | 1.90294200  |
| N | 2.87241900  | 0.65054800  | -1.47763300 | H            | 1.75840700  | 1.69306200  | 2.03316800  |
| H | 2.29238200  | -0.16188800 | -1.70255100 | C            | 3.50957700  | 0.49028900  | 2.32945900  |
| F | 5.69484400  | -3.72220100 | -0.08619700 | H            | 4.07816800  | 1.30317300  | 2.76981200  |
| F | 5.43902800  | -3.50719100 | -2.23405700 | C            | 4.10041700  | -0.76179600 | 2.16422300  |
| F | 7.39813000  | -3.20044700 | -1.32826900 | H            | 5.12563100  | -0.92003900 | 2.48255800  |
| F | 6.80558500  | 1.37176500  | 2.13235500  | C            | 3.38973000  | -1.78622100 | 1.53846200  |
| F | 7.13731900  | 2.76146900  | 0.49416900  | H            | 3.86282300  | -2.74559200 | 1.35792800  |
| F | 8.48508700  | 1.07367900  | 0.78263700  | C            | 2.08635600  | -1.56460700 | 1.09239100  |
| C | -0.27709300 | 2.42860800  | -1.58496200 | H            | 1.55280200  | -2.35264500 | 0.57552400  |
| H | -1.08278500 | 1.74006600  | -1.86685400 | C            | -1.04460000 | -0.78796200 | 2.46705800  |
| C | -0.42900800 | 3.72916500  | -2.38924700 | C            | -2.18469900 | -0.24349800 | 3.07073600  |
| H | 0.38044300  | 4.42224500  | -2.14864500 | H            | -2.63295500 | 0.64470600  | 2.65759100  |
| H | -1.39017200 | 4.20554200  | -2.17363700 | C            | -2.75116900 | -0.83047500 | 4.20069900  |
| H | -0.39864000 | 3.52191600  | -3.46168500 | H            | -3.63816400 | -0.38796500 | 4.64455900  |
| C | 2.14315300  | 1.80548000  | -1.36117100 | C            | -2.19908500 | -1.99095000 | 4.73904600  |
| C | 4.16902900  | 0.29460100  | -1.10196000 | H            | -2.64398200 | -2.45581500 | 5.61395600  |
| C | 4.52830500  | -1.03751100 | -1.37340400 | C            | -1.07185000 | -2.55276100 | 4.13906200  |
| H | 3.82197000  | -1.68989600 | -1.87560900 | H            | -0.62817400 | -3.45640000 | 4.54728100  |
| C | 5.76116400  | -1.53102200 | -0.96794900 | C            | -0.49657800 | -1.95653300 | 3.01752800  |
| C | 6.66736800  | -0.71888000 | -0.28493300 | H            | 0.38980400  | -2.40202800 | 2.58428200  |
| H | 7.62268600  | -1.10802400 | 0.04407100  | P            | -0.31038000 | -0.09586300 | 0.91274300  |

|    |             |             |             |            |             |             |             |
|----|-------------|-------------|-------------|------------|-------------|-------------|-------------|
| Fe | -2.31085300 | 2.70998700  | 0.73825800  | C          | -0.28151200 | 2.41065200  | -1.58362800 |
| C  | -3.71093700 | 1.37388700  | 0.02234400  | H          | -1.09110900 | 1.72431200  | -1.85921700 |
| C  | -4.17244900 | 1.93326000  | 1.26369800  | C          | -0.43165300 | 3.70361800  | -2.40030500 |
| H  | -4.42071000 | 1.37546700  | 2.15312600  | H          | 0.38024000  | 4.39713300  | -2.16950700 |
| C  | -4.26101000 | 3.34698500  | 1.11984500  | H          | -1.39092700 | 4.18448500  | -2.18629000 |
| C  | -3.87263200 | 3.68159100  | -0.21020800 | H          | -0.40585500 | 3.48464400  | -3.47050300 |
| C  | -3.52798500 | 2.47414300  | -0.88316800 | C          | 2.13880000  | 1.78957200  | -1.36295600 |
| H  | -3.17302500 | 2.39098500  | -1.90055900 | C          | 4.17168900  | 0.28855500  | -1.10549400 |
| C  | -4.16448100 | -1.37131900 | 0.88046700  | C          | 4.53627000  | -1.04235800 | -1.37539000 |
| C  | -5.41708500 | -1.05312200 | 1.42307900  | H          | 3.83086500  | -1.69944800 | -1.87290000 |
| H  | -5.95029300 | -0.17195400 | 1.07990900  | C          | 5.77356600  | -1.52869500 | -0.97454600 |
| C  | -5.99016600 | -1.87649900 | 2.39085100  | C          | 6.67894700  | -0.71019300 | -0.29817300 |
| H  | -6.95762800 | -1.62024600 | 2.81371100  | H          | 7.63781900  | -1.09367800 | 0.02707200  |
| C  | -5.32939900 | -3.03648800 | 2.80377900  | C          | 6.31682100  | 0.61133300  | -0.05236200 |
| H  | -5.77834600 | -3.67731200 | 3.55746400  | C          | 5.08587900  | 1.12604400  | -0.45624100 |
| C  | -4.09932000 | -3.37564300 | 2.23967200  | H          | 4.81298100  | 2.14493400  | -0.22739300 |
| H  | -3.58216200 | -4.27652500 | 2.55509300  | C          | 6.09244200  | -2.98333700 | -1.16912700 |
| C  | -3.51833900 | -2.54680600 | 1.28123400  | C          | 7.19785100  | 1.47172100  | 0.80730000  |
| H  | -2.55444600 | -2.79021100 | 0.84465600  | Cl         | 0.78123700  | -1.93565000 | -1.88428400 |
| C  | -4.67263800 | -0.63626000 | -1.77315500 | H          | -1.98124300 | -2.07313200 | -2.11536500 |
| C  | -4.76635200 | -1.92144700 | -2.33152300 | H          | -1.83038300 | -1.14738400 | -2.60574500 |
| H  | -4.08800600 | -2.70372400 | -2.00370400 | Ir         | -1.31543600 | -1.01018600 | -1.04386000 |
| C  | -5.73158600 | -2.21013200 | -3.29246600 | C          | 0.80755700  | 1.06522000  | -3.31516300 |
| H  | -5.78757600 | -3.20930400 | -3.71478300 | H          | -0.12560500 | 0.50641800  | -3.40149300 |
| C  | -6.62333700 | -1.21877000 | -3.71054200 | H          | 0.83542700  | 1.86371400  | -4.06839200 |
| H  | -7.37356800 | -1.44179600 | -4.46362200 | H          | 1.62510900  | 0.37998000  | -3.51576500 |
| C  | -6.54871700 | 0.05454100  | -3.14984700 | <b>A-3</b> |             |             |             |
| H  | -7.24410300 | 0.82947300  | -3.46018700 | C          | -1.01921500 | 3.96603100  | 1.60458100  |
| C  | -5.58345300 | 0.34459800  | -2.18163000 | C          | -0.85426800 | 3.92318100  | 0.19550800  |
| H  | -5.55057000 | 1.33614300  | -1.74652900 | H          | -0.94388200 | 4.76775900  | -0.47034600 |
| P  | -3.40096400 | -0.36596600 | -0.45563200 | C          | -0.60366600 | 2.57788600  | -0.20963300 |
| H  | -1.17492800 | 4.61894500  | 2.54206400  | C          | -0.60046000 | 1.76640300  | 0.99800500  |
| H  | -3.79843300 | 4.67906900  | -0.62225600 | C          | -0.84768200 | 2.65053200  | 2.10167800  |
| H  | -4.54194200 | 4.04474700  | 1.89744800  | H          | -0.89957500 | 2.35394800  | 3.13811800  |
| S  | 2.60309700  | 3.19675600  | -0.57690000 | C          | 1.53709300  | -0.07686600 | 1.51957800  |
| N  | 0.90886600  | 1.63483300  | -1.96506800 | C          | 2.22362200  | 1.05285900  | 1.98722600  |
| N  | 2.87138100  | 0.63694500  | -1.47483300 | H          | 1.72787700  | 2.01508800  | 2.02589900  |
| H  | 2.29326300  | -0.17845900 | -1.69458100 | C          | 3.55712000  | 0.95045300  | 2.38285400  |
| F  | 5.71036800  | -3.71889400 | -0.09063800 | H          | 4.09111500  | 1.83664900  | 2.71170400  |
| F  | 5.46177500  | -3.50699500 | -2.23957600 | C          | 4.21549700  | -0.27844500 | 2.33168700  |
| F  | 7.41681400  | -3.19374600 | -1.32724000 | H          | 5.25839900  | -0.34378700 | 2.62373000  |
| F  | 6.82191000  | 1.38558800  | 2.11315300  | C          | 3.54535100  | -1.40324500 | 1.85139800  |
| F  | 7.13349300  | 2.77494700  | 0.47074700  | H          | 4.06746200  | -2.34940900 | 1.75465600  |
| F  | 8.49376900  | 1.09600300  | 0.75220200  | C          | 2.21743400  | -1.30224500 | 1.43487200  |

|    |             |             |             |                 |             |             |             |
|----|-------------|-------------|-------------|-----------------|-------------|-------------|-------------|
| H  | 1.72185400  | -2.16652800 | 1.00926000  | H               | -1.26263100 | 4.84167400  | 2.19150500  |
| C  | -0.98212100 | -0.62237100 | 2.69459900  | H               | -4.17197500 | 4.59152700  | -0.39679000 |
| C  | -2.05285400 | -0.00895500 | 3.35491000  | H               | -4.70168900 | 3.69157000  | 2.09632700  |
| H  | -2.45757800 | 0.91578000  | 2.97603900  | S               | 2.34616200  | 3.03665500  | -1.02233100 |
| C  | -2.61714000 | -0.58133600 | 4.49605400  | N               | 0.56939300  | 1.19054000  | -1.93871700 |
| H  | -3.44790000 | -0.08267200 | 4.98791000  | N               | 2.64845000  | 0.38985800  | -1.49279400 |
| C  | -2.12744900 | -1.78573500 | 4.99516400  | H               | 2.11508200  | -0.48211100 | -1.60060600 |
| H  | -2.56822900 | -2.23391800 | 5.88084700  | F               | 5.74389200  | -3.61175200 | 0.27939100  |
| C  | -1.06413000 | -2.41264900 | 4.34192000  | F               | 5.44576500  | -3.68121700 | -1.87229200 |
| H  | -0.66850400 | -3.35186400 | 4.71827900  | F               | 7.40106000  | -3.17051200 | -1.05454700 |
| C  | -0.49788400 | -1.83844700 | 3.20580600  | F               | 6.76540000  | 1.79996400  | 1.74383400  |
| H  | 0.32847200  | -2.34289300 | 2.71994000  | F               | 6.87537000  | 2.96809100  | -0.08517700 |
| P  | -0.25532600 | -0.02102000 | 1.10145400  | F               | 8.35080000  | 1.41274000  | 0.30701100  |
| Fe | -2.41553400 | 2.67764200  | 0.70915600  | C               | -0.53328300 | 2.14536200  | -1.66495800 |
| C  | -3.71817000 | 1.27513900  | -0.03265600 | H               | -1.41425300 | 1.52577700  | -1.85636600 |
| C  | -4.16043600 | 1.68620600  | 1.27182000  | C               | -0.61464700 | 3.33116700  | -2.64028300 |
| H  | -4.30553000 | 1.02672300  | 2.11234800  | H               | 0.21908200  | 4.01966100  | -2.50382000 |
| C  | -4.39683800 | 3.08836100  | 1.25152100  | H               | -1.55545100 | 3.86955500  | -2.48934400 |
| C  | -4.12242300 | 3.56324000  | -0.06412200 | H               | -0.60712300 | 2.97239400  | -3.67251800 |
| C  | -3.70436200 | 2.45304200  | -0.85412100 | C               | 1.87492100  | 1.50360700  | -1.48621800 |
| H  | -3.41264500 | 2.49138900  | -1.89404300 | C               | 3.98511200  | 0.15565100  | -1.14494400 |
| C  | -4.17115900 | -1.40957600 | 0.72959200  | C               | 4.40792100  | -1.17996000 | -1.26192000 |
| C  | -5.54715600 | -1.19703400 | 0.91709600  | H               | 3.71710000  | -1.92930300 | -1.63134100 |
| H  | -6.07202100 | -0.47141300 | 0.30438400  | C               | 5.68763700  | -1.54951800 | -0.86962500 |
| C  | -6.24933600 | -1.91546400 | 1.88088000  | C               | 6.57906400  | -0.60702600 | -0.35617800 |
| H  | -7.31299100 | -1.73968000 | 2.01465400  | H               | 7.57318500  | -0.89834000 | -0.04121400 |
| C  | -5.58911600 | -2.86546300 | 2.66591400  | C               | 6.15826700  | 0.71588200  | -0.26054700 |
| H  | -6.13781000 | -3.42726700 | 3.41658400  | C               | 4.88088900  | 1.11232600  | -0.65457500 |
| C  | -4.22751100 | -3.09073300 | 2.47757700  | H               | 4.56980400  | 2.13927000  | -0.54718900 |
| H  | -3.70052500 | -3.81934400 | 3.08502100  | C               | 6.07144200  | -3.00172200 | -0.89069500 |
| C  | -3.52210300 | -2.36631700 | 1.51495300  | C               | 7.04187800  | 1.72701700  | 0.41331000  |
| H  | -2.46164200 | -2.53605200 | 1.39283600  | Cl              | 0.92772200  | -2.27107700 | -1.51601900 |
| C  | -4.40687100 | -0.67868500 | -2.00137400 | H               | -1.60273600 | -2.43218500 | -0.37197800 |
| C  | -4.26889900 | -1.84860400 | -2.76406600 | H               | -1.60882000 | -1.65689500 | -2.31006300 |
| H  | -3.45810800 | -2.53523300 | -2.54959000 | Ir              | -1.11320900 | -1.06982000 | -0.90073700 |
| C  | -5.15835700 | -2.12895800 | -3.79930200 | C               | 0.52200600  | 0.64246300  | -3.31721900 |
| H  | -5.03410000 | -3.03868700 | -4.37964400 | H               | -0.52238500 | 0.46775400  | -3.58157200 |
| C  | -6.19739100 | -1.24386000 | -4.09439500 | H               | 0.97449600  | 1.33944700  | -4.03403700 |
| H  | -6.88473900 | -1.45916100 | -4.90750800 | H               | 1.02906300  | -0.31826900 | -3.36729400 |
| C  | -6.34827800 | -0.08346200 | -3.33697500 |                 |             |             |             |
| H  | -7.15607600 | 0.61004700  | -3.55355300 | <b>A-TS2-C3</b> |             |             |             |
| C  | -5.46478900 | 0.19457500  | -2.29181200 | C               | -3.44942900 | -3.65602700 | 2.43118600  |
| H  | -5.60846900 | 1.09406300  | -1.70530500 | C               | -2.04365900 | -3.84476100 | 2.36745300  |
| P  | -3.27757600 | -0.42715500 | -0.55667400 | H               | -1.46943100 | -4.50901800 | 2.99699200  |

|    |             |             |             |   |             |             |             |
|----|-------------|-------------|-------------|---|-------------|-------------|-------------|
| C  | -1.49856700 | -2.97501900 | 1.37018300  | C | -1.87594500 | 3.51401500  | 2.47200700  |
| C  | -2.60696800 | -2.22857200 | 0.80829900  | H | -2.57899600 | 3.24519600  | 1.69130500  |
| C  | -3.80066000 | -2.67303100 | 1.46778900  | C | 1.12359600  | 0.72196100  | 2.05346800  |
| H  | -4.79192000 | -2.28565300 | 1.28718300  | C | 1.73712500  | -0.40313200 | 2.60926800  |
| C  | -2.05627700 | -2.04699800 | -1.93621600 | H | 1.14160600  | -1.19885100 | 3.02197200  |
| C  | -2.65121100 | -3.31412900 | -2.06882100 | C | 3.12854900  | -0.52512500 | 2.61968100  |
| H  | -3.37831200 | -3.65083100 | -1.33589400 | H | 3.59435300  | -1.40974700 | 3.04302200  |
| C  | -2.31681700 | -4.14163000 | -3.13642600 | C | 3.92020400  | 0.48172500  | 2.07458500  |
| H  | -2.78049200 | -5.12001500 | -3.22620300 | H | 4.99907900  | 0.37573600  | 2.07417100  |
| C  | -1.37107400 | -3.72145300 | -4.07681500 | C | 3.31611000  | 1.60252500  | 1.50035800  |
| H  | -1.09500200 | -4.37511800 | -4.89912700 | H | 3.92038600  | 2.37135400  | 1.03442700  |
| C  | -0.78318200 | -2.46480100 | -3.95266000 | C | 1.93056800  | 1.72232000  | 1.48251600  |
| H  | -0.05152100 | -2.12573500 | -4.67929500 | H | 1.47896900  | 2.58994600  | 1.01759400  |
| C  | -1.13130800 | -1.62345400 | -2.89399200 | P | -0.68423800 | 0.99164800  | 1.95147900  |
| H  | -0.66507000 | -0.65415600 | -2.80468400 | H | -4.12801500 | -4.13972200 | 3.12121800  |
| C  | -4.36731200 | -0.71521600 | -0.87247700 | H | -2.33656400 | -2.18464400 | 5.63816100  |
| C  | -5.15386100 | -0.02810300 | 0.06518900  | H | -4.48977600 | -0.94710200 | 4.57076900  |
| H  | -4.70581500 | 0.31872800  | 0.98690100  | S | 2.42740900  | -4.69130400 | -1.49011700 |
| C  | -6.50324000 | 0.21792700  | -0.17488400 | N | 0.26891000  | -3.61964200 | -0.27763800 |
| H  | -7.09443200 | 0.74398400  | 0.56947300  | N | 1.99198800  | -2.15322600 | -0.73494600 |
| C  | -7.08886700 | -0.19589300 | -1.37407500 | H | 1.31435100  | -1.38994400 | -0.82376600 |
| H  | -8.13801500 | 0.00659100  | -1.56866400 | F | 6.44220100  | 1.25214700  | -2.59330800 |
| C  | -6.31392700 | -0.86286600 | -2.32039400 | F | 4.32764600  | 1.76416200  | -2.71047200 |
| H  | -6.75447200 | -1.18231000 | -3.26050800 | F | 5.48228300  | 2.26580900  | -0.93392800 |
| C  | -4.96495900 | -1.12703200 | -2.07038600 | F | 6.40097900  | -3.81309300 | 1.19260200  |
| H  | -4.38146900 | -1.65145000 | -2.81667300 | F | 6.31531100  | -1.98775500 | 2.36958300  |
| P  | -2.56838200 | -0.97973700 | -0.53073500 | F | 7.82369700  | -2.20507100 | 0.81660600  |
| Fe | -2.46498400 | -1.86110400 | 2.81536900  | C | -0.03192500 | -2.91579500 | 1.00885200  |
| C  | -1.56811200 | -0.04950500 | 3.15615700  | H | 0.23947000  | -1.86981900 | 0.87323800  |
| C  | -2.99811300 | 0.06877500  | 3.25510900  | C | 0.85402600  | -3.53468700 | 2.10502500  |
| H  | -3.60710000 | 0.69899300  | 2.62564700  | H | 0.75689300  | -4.62381900 | 2.11035300  |
| C  | -3.45669000 | -0.78448800 | 4.29403500  | H | 0.58730500  | -3.16959100 | 3.09928500  |
| C  | -2.32264400 | -1.43787300 | 4.85527200  | H | 1.90050000  | -3.29130400 | 1.90968800  |
| C  | -1.16117200 | -0.97806400 | 4.17251300  | C | 1.53311700  | -3.44839500 | -0.80870800 |
| H  | -0.15499400 | -1.29220300 | 4.39497900  | C | 3.32972900  | -1.73189900 | -0.73485300 |
| C  | -0.84193200 | 2.62891000  | 2.80355100  | C | 3.67243200  | -0.54562000 | -1.39705300 |
| C  | 0.05741500  | 2.98532000  | 3.81780200  | H | 2.93172300  | -0.02570800 | -1.98662000 |
| H  | 0.86303200  | 2.31125700  | 4.08796300  | C | 4.95213600  | -0.01534000 | -1.26258200 |
| C  | -0.05990600 | 4.21419600  | 4.46663200  | C | 5.92246600  | -0.66287200 | -0.49910500 |
| H  | 0.65236400  | 4.48162300  | 5.24195400  | H | 6.91678200  | -0.24580000 | -0.39183000 |
| C  | -1.08292200 | 5.09834100  | 4.11886500  | C | 5.57900200  | -1.85467800 | 0.13852200  |
| H  | -1.17000300 | 6.05744800  | 4.62135900  | C | 4.30013000  | -2.39287000 | 0.02514600  |
| C  | -1.99572600 | 4.74125100  | 3.12497400  | H | 4.04854800  | -3.30918700 | 0.54276500  |
| H  | -2.79798200 | 5.42054800  | 2.85023700  | C | 5.29223700  | 1.30820300  | -1.88699800 |

|                 |             |             |             |    |             |             |             |
|-----------------|-------------|-------------|-------------|----|-------------|-------------|-------------|
| C               | 6.53574000  | -2.47472300 | 1.11302900  | C  | 1.35308900  | -2.47804000 | -0.56276300 |
| Cl              | 0.63055500  | 0.64510000  | -1.27425500 | H  | 1.45895700  | -1.43262700 | -0.82175500 |
| H               | -2.92950500 | 1.52684000  | 0.50559600  | C  | 2.45639400  | -3.33232200 | -0.60494600 |
| H               | -0.97003200 | 2.68699400  | -0.12180400 | H  | 3.41450000  | -2.95543300 | -0.93989600 |
| Ir              | -1.55677900 | 1.09252700  | -0.15721000 | C  | 2.31915800  | -4.66712100 | -0.23511000 |
| C               | -0.34459100 | -4.93552600 | -0.43229400 | H  | 3.18268100  | -5.32479500 | -0.25402200 |
| H               | -1.39567400 | -4.86270600 | -0.15595100 | C  | 1.07541500  | -5.15697800 | 0.17672700  |
| H               | -0.26859600 | -5.23983600 | -1.47370200 | H  | 0.96985300  | -6.19603700 | 0.47607400  |
| H               | 0.14991800  | -5.69883300 | 0.18182600  | C  | -0.02837500 | -4.31063600 | 0.20685100  |
| C               | -0.21413800 | 3.63798500  | -1.95897700 | H  | -0.99711000 | -4.69058100 | 0.51864500  |
| C               | -0.72345000 | 2.44033900  | -3.86557900 | C  | -2.49799200 | -2.75874300 | -1.33184500 |
| C               | -1.86604300 | 1.86131800  | -3.25706600 | C  | -3.85790100 | -2.41417700 | -1.35861300 |
| C               | -1.49667100 | 3.18937500  | -1.34097700 | H  | -4.23765300 | -1.66377100 | -0.67523600 |
| H               | 0.49350800  | 2.55584400  | -5.62285100 | C  | -4.72523600 | -3.00321100 | -2.27573900 |
| C               | -0.39264500 | 2.10155900  | -5.19091400 | H  | -5.77403000 | -2.72020000 | -2.27762600 |
| C               | -2.65413500 | 0.95926200  | -3.99279600 | C  | -4.24155200 | -3.93200800 | -3.20045600 |
| H               | -2.07541200 | 3.92998500  | -0.78471400 | H  | -4.91478700 | -4.38801300 | -3.92070400 |
| C               | -2.30854600 | 0.63221400  | -5.29370700 | C  | -2.88667500 | -4.26332700 | -3.19743300 |
| C               | -1.17232400 | 1.20153100  | -5.89927800 | H  | -2.49881100 | -4.97803700 | -3.91802600 |
| H               | -3.53429700 | 0.54133800  | -3.51768500 | C  | -2.01911300 | -3.68428600 | -2.26821700 |
| H               | -2.92196800 | -0.07020700 | -5.85089100 | H  | -0.96875200 | -3.95300200 | -2.27551400 |
| H               | -0.91039600 | 0.93740100  | -6.91937900 | P  | -1.35320200 | -1.86049700 | -0.20048900 |
| N               | -2.26828800 | 2.23541600  | -1.98467600 | Fe | -3.19014500 | -0.96517200 | 2.62443300  |
| N               | 0.10830800  | 3.28943400  | -3.16402200 | C  | -3.55836000 | 0.83430900  | 1.63523500  |
| C               | 0.77918900  | 4.30681800  | -1.09604000 | C  | -4.78712600 | 0.23106800  | 2.07258100  |
| C               | 2.14497200  | 4.16055600  | -1.39272800 | H  | -5.60081800 | -0.07446400 | 1.43216600  |
| C               | 0.40870300  | 4.96186700  | 0.08977500  | C  | -4.73993500 | 0.09584200  | 3.48931200  |
| C               | 3.11183800  | 4.66243200  | -0.52755800 | C  | -3.48129000 | 0.59454900  | 3.93901300  |
| H               | 2.42627200  | 3.61042300  | -2.28241400 | C  | -2.74341700 | 1.02917700  | 2.79997200  |
| C               | 1.37899100  | 5.46279200  | 0.95720100  | H  | -1.72623600 | 1.39095200  | 2.78819600  |
| H               | -0.63652100 | 5.07846700  | 0.35454700  | C  | -4.71141600 | 1.17973700  | -0.95803900 |
| C               | 2.73253700  | 5.31255200  | 0.65187500  | C  | -5.86086400 | 1.78794700  | -0.42211000 |
| H               | 4.16172700  | 4.51000300  | -0.75724800 | H  | -5.79849900 | 2.32462300  | 0.51916600  |
| H               | 1.07169800  | 5.94909200  | 1.87793800  | C  | -7.07712000 | 1.72080600  | -1.09626600 |
| H               | 3.48955300  | 5.68650300  | 1.33547600  | H  | -7.95701900 | 2.19270600  | -0.66858000 |
| <b>A-TS2-N4</b> |             |             |             | C  | -7.16206200 | 1.05599400  | -2.32358400 |
| C               | -3.45658800 | -2.95380500 | 3.15183900  | H  | -8.11086900 | 1.00524000  | -2.85013800 |
| C               | -2.27932500 | -2.42901300 | 3.75192900  | C  | -6.02292100 | 0.47062000  | -2.87294000 |
| H               | -2.09367100 | -2.34347100 | 4.81349900  | H  | -6.07519100 | -0.03903400 | -3.83065000 |
| C               | -1.39932300 | -1.97495600 | 2.72096000  | C  | -4.80267100 | 0.53665300  | -2.19548500 |
| C               | -2.05297500 | -2.22542300 | 1.45546400  | H  | -3.91810100 | 0.08317000  | -2.62421900 |
| C               | -3.31934000 | -2.83687700 | 1.74150500  | C  | -2.96468900 | 3.18178000  | 0.03586000  |
| H               | -4.05153000 | -3.14352300 | 1.01162100  | C  | -3.48404800 | 3.96146600  | -1.01108000 |
| C               | 0.10571800  | -2.96485100 | -0.17285100 | H  | -4.03731400 | 3.49082300  | -1.81649800 |

C -3.29651400 5.34331200 -1.02792500  
 H -3.70981000 5.92994800 -1.84353000  
 C -2.58334000 5.96812000 -0.00258300  
 H -2.43904300 7.04469600 -0.01414000  
 C -2.05169300 5.19795600 1.03186400  
 H -1.48160700 5.66945900 1.82696500  
 C -2.23565100 3.81551900 1.05091200  
 H -1.78568500 3.23700600 1.84380700  
 P -3.11324300 1.34179500 -0.05757700  
 H -4.32389800 -3.33500900 3.67456500  
 H -3.12327600 0.58681600 4.95986400  
 H -5.50625000 -0.35178100 4.10821800  
 S 3.69761800 -2.84564300 2.89770800  
 N 1.06331600 -2.33479700 2.78872200  
 N 2.44661200 -0.69728200 1.89744700  
 H 1.61568700 -0.14692400 1.68411500  
 F 5.59368200 4.14850200 0.59165400  
 F 3.96587300 4.02609800 2.03587700  
 F 6.00090400 3.55934700 2.64002800  
 F 6.70757300 -0.14903700 -1.92195400  
 F 6.43703200 -2.01640300 -0.83840300  
 F 7.95026000 -0.58356700 -0.19877600  
 C -0.04320600 -1.34974700 2.93012300  
 H 0.04707000 -0.61238300 2.13726200  
 C 0.09772800 -0.62851600 4.27831900  
 H 0.03705200 -1.33359500 5.11347300  
 H -0.67922100 0.12762300 4.40567000  
 H 1.07297200 -0.13609800 4.32545400  
 C 2.34051000 -1.92233800 2.50338100  
 C 3.62674300 -0.06239600 1.45705200  
 C 3.77936900 1.29704400 1.73573900  
 H 3.02346700 1.81322500 2.31454200  
 C 4.89715800 1.98578900 1.26248500  
 C 5.86059300 1.33573500 0.49544800  
 H 6.72386500 1.87439700 0.12090200  
 C 5.68808600 -0.01964400 0.20634900  
 C 4.58907700 -0.72282800 0.68655900  
 H 4.46985100 -1.77139200 0.46980600  
 C 5.10660300 3.42599400 1.63520800  
 C 6.69321000 -0.70007800 -0.67758900  
 Ir -1.27724500 0.38284200 -0.89789600  
 H -2.11312400 -0.14084400 -2.13296700  
 Cl 0.23534200 1.40627300 0.83514300  
 H -1.25273000 1.81660900 -1.88456400

C 1.79657300 0.50636900 -2.67223200  
 C 2.10297500 2.58185000 -1.72304100  
 C 0.74378600 2.93368300 -1.94428400  
 C 0.41484500 0.81203000 -2.89016000  
 H 3.99747100 3.26570900 -0.99414300  
 C 2.95967700 3.53643600 -1.13281200  
 C 0.25475500 4.18965100 -1.54662300  
 H -0.20719300 0.20430400 -3.53348200  
 C 1.10850000 5.09006400 -0.93970300  
 C 2.46799900 4.76349100 -0.73755200  
 H -0.79317400 4.41986400 -1.70295900  
 H 0.72782400 6.05314300 -0.61406700  
 H 3.13207300 5.47463800 -0.25702800  
 N -0.09961000 2.03292200 -2.57158600  
 N 2.61043800 1.37015800 -2.09337800  
 C 2.37541200 -0.77363800 -3.14731200  
 C 3.76129000 -0.96879100 -3.03662200  
 C 1.58967500 -1.80061300 -3.69471600  
 C 4.34708500 -2.15769100 -3.46146700  
 H 4.36221700 -0.17581900 -2.61196800  
 C 2.17879300 -2.98680300 -4.12632500  
 H 0.51149700 -1.69815100 -3.75852600  
 C 3.55761000 -3.17121900 -4.01117600  
 H 5.41843200 -2.29013600 -3.35009100  
 H 1.55570100 -3.77465200 -4.53997900  
 H 4.01253100 -4.10095400 -4.34076600  
 C 0.88841200 -3.61796300 3.46248700  
 H 1.15972700 -3.56576100 4.52471100  
 H -0.15380900 -3.91984400 3.36340000  
 H 1.52499900 -4.36001500 2.98622300

**A-TS2-N1**

C -0.53578800 -4.44956700 -0.04523100  
 C -0.98984400 -3.80475700 -1.22400900  
 H -1.38364400 -4.29217600 -2.10282500  
 C -0.84466000 -2.39831400 -1.07245200  
 C -0.25007300 -2.16598000 0.22411600  
 C -0.09001300 -3.45001200 0.85731600  
 H 0.31355700 -3.62521500 1.84093000  
 C -1.38922100 0.19731600 1.35479000  
 C -1.51189700 1.58297600 1.50256500  
 H -0.66962700 2.21910300 1.25165400  
 C -2.69339700 2.14264600 1.99721200  
 H -2.77013100 3.21975800 2.11941600  
 C -3.76433100 1.31787600 2.34778500

|    |             |             |             |    |              |             |             |
|----|-------------|-------------|-------------|----|--------------|-------------|-------------|
| H  | -4.68514400 | 1.74749900  | 2.72951400  | H  | 5.23421400   | 0.65623300  | -4.77987600 |
| C  | -3.65646600 | -0.06516900 | 2.17648400  | C  | 4.54118600   | -0.09803000 | -2.89505300 |
| H  | -4.49759200 | -0.71047600 | 2.40935300  | H  | 3.55922800   | -0.32589300 | -3.28281900 |
| C  | -2.47710600 | -0.62422000 | 1.68929800  | P  | 3.52466300   | -0.89869000 | -0.37523800 |
| H  | -2.40682600 | -1.69826300 | 1.55941900  | H  | -0.49907300  | -5.51733200 | 0.12527400  |
| C  | 0.77752200  | -1.06577500 | 2.65402800  | H  | 1.48672000   | -4.38203100 | -3.45190700 |
| C  | 1.82009400  | -1.98864200 | 2.81361100  | H  | 2.34084200   | -5.78060300 | -1.30400800 |
| H  | 2.27398400  | -2.44457500 | 1.94446700  | S  | -3.99801400  | -2.47514700 | -1.16219200 |
| C  | 2.28899100  | -2.32608500 | 4.08114200  | N  | -2.31349600  | -0.44194300 | -1.71408500 |
| H  | 3.10250900  | -3.03883100 | 4.17660800  | N  | -4.38607500  | 0.19249000  | -1.00051700 |
| C  | 1.73535500  | -1.72786900 | 5.21399500  | H  | -3.90975200  | 1.06422200  | -0.81470100 |
| H  | 2.10410800  | -1.98371900 | 6.20320700  | F  | -9.03237500  | 2.87387300  | 1.66888000  |
| C  | 0.70743200  | -0.79650400 | 5.06619400  | F  | -7.12871800  | 2.63822500  | 2.69687300  |
| H  | 0.26960800  | -0.32325000 | 5.94061800  | F  | -7.24042200  | 3.84831200  | 0.89878300  |
| C  | 0.22680800  | -0.47009600 | 3.79664800  | F  | -8.89169400  | -2.64629600 | 0.49950900  |
| H  | -0.57673000 | 0.25062100  | 3.70349800  | F  | -8.74054500  | -2.39697600 | -1.65335200 |
| P  | 0.23638400  | -0.57032700 | 0.95559700  | F  | -10.22499300 | -1.26988800 | -0.52375300 |
| Fe | 1.00780300  | -3.34171900 | -0.88941500 | C  | -1.20916600  | -1.36417100 | -2.10681400 |
| C  | 2.90784600  | -2.47033700 | -1.07708800 | H  | -0.34806700  | -0.70547300 | -2.18195200 |
| C  | 2.99503900  | -3.79148400 | -0.51756600 | C  | -1.45478200  | -1.94286000 | -3.50271100 |
| H  | 3.40154200  | -4.04241700 | 0.45077000  | H  | -2.34036300  | -2.58159000 | -3.52443500 |
| C  | 2.44310000  | -4.71383300 | -1.45320400 | H  | -0.58268700  | -2.52281700 | -3.82078700 |
| C  | 1.99313500  | -3.97471400 | -2.58701900 | H  | -1.59334900  | -1.12377800 | -4.21541700 |
| C  | 2.25657500  | -2.59470000 | -2.35109000 | C  | -3.54224600  | -0.86336200 | -1.31074300 |
| H  | 1.97501800  | -1.76884600 | -2.98637900 | C  | -5.71135000  | 0.21778500  | -0.55021200 |
| C  | 4.56179000  | -1.40227700 | 1.05588600  | C  | -6.10177100  | 1.37190700  | 0.14293200  |
| C  | 5.46498100  | -2.47377600 | 0.94450200  | H  | -5.38255200  | 2.16611900  | 0.31034800  |
| H  | 5.51680300  | -3.04386700 | 0.02296300  | C  | -7.39302000  | 1.50280500  | 0.64359300  |
| C  | 6.31519100  | -2.79444500 | 2.00044600  | C  | -8.33945500  | 0.50181300  | 0.44091000  |
| H  | 7.00226000  | -3.63041800 | 1.90454300  | H  | -9.34579700  | 0.60273800  | 0.82593500  |
| C  | 6.29614100  | -2.03004300 | 3.17153600  | C  | -7.96074500  | -0.62434200 | -0.29018800 |
| H  | 6.96497000  | -2.27591300 | 3.99172800  | C  | -6.66823000  | -0.77983800 | -0.78895500 |
| C  | 5.42756700  | -0.94515200 | 3.27553400  | H  | -6.40099000  | -1.66223100 | -1.34883000 |
| H  | 5.41308800  | -0.33254100 | 4.17144800  | C  | -7.71073800  | 2.71594800  | 1.46907200  |
| C  | 4.56237000  | -0.63513900 | 2.22530400  | C  | -8.95571900  | -1.73538200 | -0.49779200 |
| H  | 3.88527900  | 0.20418800  | 2.31698800  | Ir | 1.84716000   | 0.68042800  | -0.01527300 |
| C  | 4.83573900  | -0.32417100 | -1.54159800 | H  | 2.27863500   | 0.83155500  | 1.48664700  |
| C  | 6.10075000  | 0.04845200  | -1.05604800 | Cl | 1.33413600   | 0.75153500  | -2.48528600 |
| H  | 6.35317600  | -0.10826000 | -0.01486000 | H  | 1.02556200   | 2.18938500  | 0.33120300  |
| C  | 7.04271800  | 0.63311500  | -1.90370600 | C  | 3.06214300   | 2.88717500  | -0.18592600 |
| H  | 8.01520100  | 0.91459100  | -1.50878100 | C  | 1.14123400   | 3.72576900  | -1.29728200 |
| C  | 6.74028400  | 0.85140300  | -3.24835400 | C  | 1.89326800   | 3.81994100  | -2.49364100 |
| H  | 7.47202200  | 1.31102700  | -3.90644700 | C  | 3.73368300   | 2.94706600  | -1.46377000 |
| C  | 5.48809500  | 0.47961200  | -3.73907200 | H  | -0.76583900  | 4.02822600  | -0.34856200 |



|                 |             |             |             |    |             |             |             |
|-----------------|-------------|-------------|-------------|----|-------------|-------------|-------------|
| C               | -0.20753900 | 4.12191400  | -1.27536300 | C  | 3.54666100  | -2.40557100 | 0.29089100  |
| C               | 1.27601300  | 4.34994800  | -3.64490100 | C  | 4.47313800  | -1.51564300 | 0.85537100  |
| C               | -0.05137900 | 4.73525700  | -3.61362200 | H  | 4.15089600  | -0.52401100 | 1.13872000  |
| C               | -0.79993200 | 4.61446200  | -2.42446400 | C  | 5.79197700  | -1.90687600 | 1.09230700  |
| H               | 1.87017200  | 4.41355000  | -4.55045800 | H  | 6.48570200  | -1.19467500 | 1.53041700  |
| H               | -0.52429500 | 5.12781300  | -4.50888700 | C  | 6.21500600  | -3.19600300 | 0.77483100  |
| H               | -1.84214600 | 4.91992500  | -2.40866800 | H  | 7.24237700  | -3.49884900 | 0.95559600  |
| N               | 3.20506300  | 3.40364200  | -2.56244000 | C  | 5.30128100  | -4.09973600 | 0.23066800  |
| N               | 1.72755000  | 3.25708500  | -0.12608900 | H  | 5.61047400  | -5.11251900 | -0.01167400 |
| C               | 3.82288100  | 2.88772200  | 1.09082100  | C  | 3.98282900  | -3.71120700 | -0.00254900 |
| C               | 3.16510100  | 3.17723200  | 2.30029100  | H  | 3.29779700  | -4.43922600 | -0.41780000 |
| C               | 5.19632000  | 2.59647900  | 1.13355700  | P  | 1.78497600  | -1.85060700 | 0.09158800  |
| C               | 3.84920700  | 3.13604800  | 3.51117000  | Fe | 1.28233000  | -1.80044100 | -3.33633400 |
| H               | 2.10950200  | 3.42080500  | 2.27585600  | C  | 1.33273900  | 0.23412200  | -3.18094400 |
| C               | 5.87954700  | 2.56385500  | 2.34752400  | C  | 2.65899700  | -0.29914600 | -3.34213500 |
| H               | 5.73787300  | 2.37012400  | 0.22425100  | H  | 3.45022600  | -0.22408300 | -2.60910600 |
| C               | 5.21151500  | 2.82452800  | 3.54411600  | C  | 2.71901400  | -0.98187600 | -4.58703700 |
| H               | 3.31714400  | 3.35296500  | 4.43326500  | C  | 1.44023300  | -0.88097900 | -5.20776200 |
| H               | 6.93918900  | 2.32480700  | 2.35515100  | C  | 0.59142900  | -0.11843000 | -4.35731300 |
| H               | 5.74597400  | 2.79636900  | 4.48933400  | H  | -0.43242500 | 0.14024700  | -4.57388300 |
| C               | -2.08251600 | 0.97459300  | -2.03034100 | C  | 1.91047900  | 2.76600200  | -2.26648300 |
| H               | -2.03552500 | 1.58750500  | -1.12110500 | C  | 1.36704700  | 3.62746300  | -3.23304600 |
| H               | -1.11614200 | 1.08052600  | -2.51800600 | H  | 0.35848900  | 3.46368900  | -3.59813200 |
| H               | -2.86665800 | 1.35925000  | -2.69160700 | C  | 2.11397700  | 4.69649500  | -3.72291600 |
| H               | 4.76071200  | 2.60311700  | -1.52822200 | H  | 1.68003300  | 5.36034100  | -4.46526200 |
| <b>A-TS2-C2</b> |             |             |             | C  | 3.41613400  | 4.91221300  | -3.26308200 |
| C               | 1.38383500  | -3.86540400 | -3.46603700 | H  | 3.99732300  | 5.74612300  | -3.64653600 |
| C               | 0.03609100  | -3.47161500 | -3.27144600 | C  | 3.96411700  | 4.05534400  | -2.31011400 |
| H               | -0.77975300 | -3.67144600 | -3.95003300 | H  | 4.96903100  | 4.21926400  | -1.93420700 |
| C               | -0.06292400 | -2.71941400 | -2.05823000 | C  | 3.21506300  | 2.98719100  | -1.81255800 |
| C               | 1.26682600  | -2.65668300 | -1.47809200 | H  | 3.64365000  | 2.33138100  | -1.06434500 |
| C               | 2.14369800  | -3.36401000 | -2.37540100 | C  | -0.76123300 | 1.85746600  | -1.83053200 |
| H               | 3.21501700  | -3.42998500 | -2.28448000 | C  | -1.78786000 | 1.15065000  | -2.46028400 |
| C               | 0.91177400  | -2.86180400 | 1.37798300  | H  | -1.57199100 | 0.23153100  | -2.97861400 |
| C               | 1.36096900  | -4.13445800 | 1.76777500  | C  | -3.10567300 | 1.60822000  | -2.40833800 |
| H               | 2.26064800  | -4.56050400 | 1.34806400  | H  | -3.89178700 | 1.03895200  | -2.89536500 |
| C               | 0.66848200  | -4.86655900 | 2.73091600  | C  | -3.41120900 | 2.77635100  | -1.71523900 |
| H               | 1.03401300  | -5.84861200 | 3.01817000  | H  | -4.43601200 | 3.12225300  | -1.64705400 |
| C               | -0.48387900 | -4.34365300 | 3.32214900  | C  | -2.39377800 | 3.48447700  | -1.06959400 |
| H               | -1.02409200 | -4.91755600 | 4.06951500  | H  | -2.63663500 | 4.37237600  | -0.49540100 |
| C               | -0.92959600 | -3.07754500 | 2.95074000  | C  | -1.08063600 | 3.02884000  | -1.12375000 |
| H               | -1.81737600 | -2.64949400 | 3.40326300  | H  | -0.30094800 | 3.57207800  | -0.59943800 |
| C               | -0.23289400 | -2.34311000 | 1.99211900  | P  | 0.96725900  | 1.27018800  | -1.73586200 |
| H               | -0.56428000 | -1.34492600 | 1.75356000  | H  | 1.77815300  | -4.39689900 | -4.32189700 |

|    |             |             |             |            |             |             |             |
|----|-------------|-------------|-------------|------------|-------------|-------------|-------------|
| H  | 1.14831900  | -1.33418200 | -6.14597300 | C          | 0.47241100  | 0.32030100  | 5.42618300  |
| H  | 3.56832400  | -1.53584800 | -4.96429600 | H          | 1.26539500  | 3.80012900  | 2.77946700  |
| S  | -4.13753100 | -3.40728400 | 1.02202600  | C          | 0.70735300  | -1.00746100 | 5.75052100  |
| N  | -1.90663700 | -2.90071900 | -0.38207800 | C          | 1.55380900  | -1.78379400 | 4.94036800  |
| N  | -3.11010000 | -1.03675700 | 0.24659600  | H          | -0.16004300 | 0.95672000  | 6.03687600  |
| H  | -2.23922300 | -0.51244900 | 0.35961800  | H          | 0.24810500  | -1.44355400 | 6.63237600  |
| F  | -6.05657300 | 3.60089900  | 2.41313400  | H          | 1.74583900  | -2.82166600 | 5.19407000  |
| F  | -3.89553400 | 3.46705200  | 2.16024000  | N          | 0.83791200  | 2.22696300  | 4.00469100  |
| F  | -5.14747800 | 4.17431400  | 0.52852700  | N          | 2.52078600  | 0.63177100  | 2.33807100  |
| F  | -8.73400500 | 0.74655500  | -0.87435800 | C          | 3.65077800  | 2.75090600  | 1.77071500  |
| F  | -8.62052000 | -0.95155700 | 0.47549100  | C          | 4.88983100  | 2.17162700  | 2.05970400  |
| F  | -7.83086400 | -1.12184100 | -1.54062300 | C          | 3.60462600  | 4.03865000  | 1.22531800  |
| C  | -1.35966000 | -2.13948900 | -1.54309100 | C          | 6.06900400  | 2.86645900  | 1.78988600  |
| H  | -1.15143200 | -1.12527400 | -1.20217100 | H          | 4.90981600  | 1.18144800  | 2.50063800  |
| C  | -2.43938700 | -2.10858400 | -2.64068900 | C          | 4.78217200  | 4.73912000  | 0.97230600  |
| H  | -2.79090800 | -3.12319400 | -2.85080600 | H          | 2.64792200  | 4.48550100  | 0.96917000  |
| H  | -2.06081100 | -1.67955000 | -3.57194700 | C          | 6.01925800  | 4.15259500  | 1.24852400  |
| H  | -3.29196800 | -1.51782000 | -2.30168600 | H          | 7.02773100  | 2.40730800  | 2.01457900  |
| C  | -3.01800600 | -2.41852800 | 0.26058200  | H          | 4.73256700  | 5.73566700  | 0.54357700  |
| C  | -4.26509800 | -0.26123200 | 0.40521100  | H          | 6.93772000  | 4.69661200  | 1.04751200  |
| C  | -4.13598900 | 1.01554500  | 0.97042800  | <b>A-4</b> |             |             |             |
| H  | -3.17171000 | 1.34710700  | 1.33276900  | C          | 3.43115500  | -3.81383800 | -2.20240300 |
| C  | -5.23596000 | 1.86466300  | 1.03207500  | C          | 2.02511900  | -3.99383000 | -2.12159800 |
| C  | -6.48504100 | 1.46440200  | 0.55758000  | H          | 1.44757400  | -4.70102400 | -2.69924600 |
| H  | -7.33918400 | 2.12839200  | 0.61144100  | C          | 1.48423800  | -3.05314800 | -1.18898100 |
| C  | -6.60544600 | 0.19260600  | -0.00034000 | C          | 2.59518700  | -2.26880500 | -0.68695000 |
| C  | -5.51150400 | -0.66670300 | -0.08866100 | C          | 3.78714800  | -2.76342000 | -1.31539800 |
| H  | -5.62549300 | -1.64211400 | -0.54042600 | H          | 4.77985200  | -2.36692800 | -1.16578800 |
| C  | -5.07639500 | 3.26690200  | 1.54608700  | C          | 2.05339800  | -1.87668200 | 2.04715200  |
| C  | -7.94675700 | -0.28307200 | -0.48569500 | C          | 2.60876800  | -3.15178600 | 2.25345200  |
| Cl | -0.67296300 | 0.85576000  | 1.29582800  | H          | 3.29694000  | -3.56830600 | 1.52423700  |
| H  | 3.08852500  | 0.47328000  | -0.28745900 | C          | 2.28488600  | -3.88533500 | 3.39062800  |
| H  | 1.75400500  | 2.13573800  | 0.89899700  | H          | 2.71596600  | -4.87177800 | 3.53652900  |
| Ir | 1.62550900  | 0.48266200  | 0.31083900  | C          | 1.39249100  | -3.36034700 | 4.33031100  |
| C  | -1.63748100 | -4.33330300 | -0.32401000 | H          | 1.12520500  | -3.94048300 | 5.20872600  |
| H  | -0.60104900 | -4.50828700 | -0.60730200 | C          | 0.84786700  | -2.09333500 | 4.13482400  |
| H  | -1.79203900 | -4.67925000 | 0.69591600  | H          | 0.16057300  | -1.67151900 | 4.86137700  |
| H  | -2.30576400 | -4.90027700 | -0.98475900 | C          | 1.18391300  | -1.34656700 | 3.00391300  |
| C  | 2.37749400  | 2.00442900  | 2.10424500  | H          | 0.75137000  | -0.36867300 | 2.86093200  |
| C  | 1.88476700  | 0.09264100  | 3.44685200  | C          | 4.37638500  | -0.65994100 | 0.87482000  |
| C  | 1.05863000  | 0.88417600  | 4.28156200  | C          | 5.16607500  | -0.03707900 | -0.10418100 |
| C  | 1.44064000  | 2.74800000  | 2.99775800  | H          | 4.71749100  | 0.26864800  | -1.04021600 |
| H  | 2.79529300  | -1.83560400 | 3.18130500  | C          | 6.52105700  | 0.19883300  | 0.11297300  |
| C  | 2.13803600  | -1.24271400 | 3.80612200  | H          | 7.11453400  | 0.67528300  | -0.66225600 |

|    |             |             |             |    |             |             |             |
|----|-------------|-------------|-------------|----|-------------|-------------|-------------|
| C  | 7.10963700  | -0.16109800 | 1.32803200  | H  | -1.31023200 | -1.31786400 | 0.91582300  |
| H  | 8.16340800  | 0.03416700  | 1.50400100  | F  | -6.44405900 | 1.38162100  | 2.57613100  |
| C  | 6.33191800  | -0.76422200 | 2.31398000  | F  | -4.33987700 | 1.94521000  | 2.60039800  |
| H  | 6.77455600  | -1.04020800 | 3.26671500  | F  | -5.55268400 | 2.30263900  | 0.82696400  |
| C  | 4.97679200  | -1.01823100 | 2.08853800  | F  | -6.39341100 | -3.89972200 | -0.90231500 |
| H  | 4.39057100  | -1.49015100 | 2.86684600  | F  | -6.33810100 | -2.15431100 | -2.19624100 |
| P  | 2.57320200  | -0.93121900 | 0.56205500  | F  | -7.82916600 | -2.28458700 | -0.61706500 |
| Fe | 2.45026900  | -2.04841600 | -2.71370300 | C  | 0.01998600  | -2.96939100 | -0.82452800 |
| C  | 1.54579900  | -0.26985100 | -3.18251000 | H  | -0.25172800 | -1.91684200 | -0.75844000 |
| C  | 2.97593000  | -0.15218000 | -3.28380900 | C  | -0.87188100 | -3.66193400 | -1.87038300 |
| H  | 3.57991600  | 0.51836600  | -2.69268900 | H  | -0.77881500 | -4.74900300 | -1.79814700 |
| C  | 3.44271300  | -1.07186400 | -4.26030500 | H  | -0.60653400 | -3.36997100 | -2.88870100 |
| C  | 2.31407500  | -1.76803000 | -4.77919200 | H  | -1.91653800 | -3.40028100 | -1.69020700 |
| C  | 1.14764900  | -1.26839600 | -4.13383500 | C  | -1.52928000 | -3.37325000 | 1.03869300  |
| H  | 0.14474000  | -1.60461300 | -4.33775700 | C  | -3.32690600 | -1.66950400 | 0.85852800  |
| C  | 0.80241400  | 2.42859600  | -2.95728400 | C  | -3.67368900 | -0.44482500 | 1.44401900  |
| C  | -0.13226800 | 2.76368200  | -3.94674300 | H  | -2.93166100 | 0.12013400  | 1.98942000  |
| H  | -0.95685500 | 2.09306600  | -4.16156100 | C  | -4.96115200 | 0.06138700  | 1.28978200  |
| C  | -0.02462300 | 3.96781700  | -4.64200700 | C  | -5.93195200 | -0.64331600 | 0.57938400  |
| H  | -0.76324500 | 4.21810000  | -5.39816800 | H  | -6.93174100 | -0.24387200 | 0.45691700  |
| C  | 1.02179500  | 4.84952800  | -4.36496000 | C  | -5.58215200 | -1.86930400 | 0.01450200  |
| H  | 1.10031900  | 5.79008200  | -4.90261400 | C  | -4.29698200 | -2.38617200 | 0.15028200  |
| C  | 1.96908800  | 4.51368700  | -3.39629800 | H  | -4.04053700 | -3.33123600 | -0.31004200 |
| H  | 2.78989200  | 5.19071500  | -3.17644700 | C  | -5.31483500 | 1.41531900  | 1.83597600  |
| C  | 1.86080300  | 3.31041000  | -2.69837500 | C  | -6.54142900 | -2.56038700 | -0.90844900 |
| H  | 2.59296300  | 3.05974200  | -1.93850000 | Cl | -0.60840000 | 0.74355000  | 1.22669800  |
| C  | -1.14659300 | 0.54815900  | -2.10443900 | H  | 2.95206100  | 1.44795400  | -0.62697600 |
| C  | -1.76369500 | -0.59493800 | -2.61873000 | H  | 1.02302100  | 2.79117700  | 0.00303600  |
| H  | -1.17107000 | -1.40256400 | -3.01189700 | Ir | 1.58082300  | 1.07871000  | 0.07346800  |
| C  | -3.15485900 | -0.72005200 | -2.61210100 | C  | 0.33623800  | -4.89192200 | 0.74278300  |
| H  | -3.62190300 | -1.61969500 | -3.00125100 | H  | 1.38324900  | -4.84717800 | 0.44577200  |
| C  | -3.94427300 | 0.30266900  | -2.09385500 | H  | 0.27413000  | -5.12525600 | 1.80325700  |
| H  | -5.02274100 | 0.19439400  | -2.07949300 | H  | -0.17358400 | -5.69052800 | 0.18920200  |
| C  | -3.33781700 | 1.44324100  | -1.56319600 | C  | 0.20255400  | 3.76546800  | 1.70576600  |
| H  | -3.93952100 | 2.22700200  | -1.11889700 | C  | 0.84701200  | 2.76400900  | 3.68480800  |
| C  | -1.95212100 | 1.56554400  | -1.56080100 | C  | 1.94979300  | 2.11837500  | 3.06766700  |
| H  | -1.50083800 | 2.45126600  | -1.13147800 | C  | 1.46990900  | 3.28624900  | 1.04635400  |
| P  | 0.66185200  | 0.82947900  | -2.03091400 | H  | -0.25507000 | 3.07478900  | 5.49030400  |
| H  | 4.10690800  | -4.34836900 | -2.85674200 | C  | 0.60246500  | 2.57081300  | 5.05530700  |
| H  | 2.33456400  | -2.56621800 | -5.50941600 | C  | 2.77826000  | 1.29217300  | 3.84777300  |
| H  | 4.47761700  | -1.24769200 | -4.52170100 | H  | 2.06777100  | 4.06007900  | 0.54733200  |
| S  | -2.41870000 | -4.56446400 | 1.81222500  | C  | 2.51494800  | 1.10483600  | 5.19586400  |
| N  | -0.27038900 | -3.58432400 | 0.50903400  | C  | 1.42337700  | 1.74490300  | 5.80906800  |
| N  | -1.98762600 | -2.08539800 | 0.87846700  | H  | 3.62747600  | 0.81943000  | 3.36777400  |

H 3.16304100 0.45995400 5.78304600  
H 1.22564300 1.59455900 6.86605200  
N 2.26729500 2.34174400 1.73888200  
N -0.04284700 3.53184800 2.95076200  
C -0.84064200 4.34208800 0.83593000  
C -2.19006500 4.21477600 1.20590600  
C -0.52956800 4.89812300 -0.41622200  
C -3.19932300 4.63524900 0.34593600  
H -2.42454900 3.74350300 2.15258400  
C -1.54246600 5.32124000 -1.27663500  
H 0.50200100 4.99940800 -0.73607200  
C -2.87927100 5.18746800 -0.89941300  
H -4.23657400 4.49552100 0.63262300  
H -1.28123900 5.73440000 -2.24601500  
H -3.66991300 5.49917600 -1.57619300

**A-TS3**

C 5.15774800 2.14126400 -1.51029000  
C 3.99910000 2.96670900 -1.52788000  
H 3.98939300 4.04347400 -1.62398800  
C 2.84684600 2.14176100 -1.34840100  
C 3.30445800 0.78137800 -1.20056700  
C 4.73675800 0.79589900 -1.31943200  
H 5.38346700 -0.06176000 -1.21284800  
C 1.58791700 -0.89242600 -2.63652500  
C 2.36214100 -0.58873700 -3.76658100  
H 3.38116300 -0.23412700 -3.65046900  
C 1.81500600 -0.69364300 -5.04454700  
H 2.42377000 -0.45272600 -5.91155100  
C 0.48297400 -1.07854900 -5.20752500  
H 0.05221700 -1.14080900 -6.20218600  
C -0.30017100 -1.35829500 -4.08805400  
H -1.34112500 -1.64190300 -4.20067300  
C 0.24985100 -1.26580600 -2.81205500  
H -0.36503900 -1.47768000 -1.94725100  
C 3.62538400 -1.95616800 -0.76208500  
C 3.94008700 -2.41665700 0.52323200  
H 3.34810200 -2.07367800 1.36535800  
C 4.96528800 -3.34246900 0.72037800  
H 5.18990500 -3.69235600 1.72401300  
C 5.68314200 -3.83127600 -0.37184900  
H 6.47332700 -4.56146900 -0.22409800  
C 5.36661100 -3.39035000 -1.65880900  
H 5.90812300 -3.77964000 -2.51625500  
C 4.34776700 -2.45771700 -1.85317400

H 4.09669100 -2.14609100 -2.85975200  
P 2.27149700 -0.70496900 -0.93715000  
Fe 4.10027100 1.92403300 0.26422700  
C 3.06923700 1.54414600 1.97970500  
C 4.30325400 0.80533600 1.95052600  
H 4.40550700 -0.26691400 1.91129500  
C 5.38343000 1.73028900 1.88092800  
C 4.83866000 3.04630100 1.85787400  
C 3.42198800 2.93804200 1.92040200  
H 2.72367900 3.75966100 1.89779800  
C 1.31349000 0.06892800 3.71135300  
C 0.18326300 0.22548300 4.52595000  
H -0.63042100 0.86275700 4.20345600  
C 0.09015500 -0.45535100 5.73910700  
H -0.79269400 -0.32459700 6.35825600  
C 1.11796100 -1.30406100 6.15340500  
H 1.04183000 -1.83412300 7.09845900  
C 2.24423600 -1.46837100 5.34588800  
H 3.05160800 -2.12422900 5.65959100  
C 2.33878800 -0.78894400 4.13178900  
H 3.21910000 -0.93098100 3.51782100  
C 0.39340500 2.39956300 2.31250100  
C 0.70056300 3.23318600 3.40161700  
H 1.51015100 2.96801100 4.07464400  
C -0.03449500 4.39365600 3.63160300  
H 0.21268400 5.02942900 4.47704300  
C -1.09501900 4.72897900 2.78453300  
H -1.67525400 5.62845800 2.96946000  
C -1.41859800 3.89854500 1.71261900  
H -2.26257500 4.13686300 1.07396000  
C -0.67671900 2.73859500 1.47957100  
H -0.95346200 2.08514200 0.66668700  
P 1.37380700 0.86489800 2.04520200  
H 6.18318100 2.48016500 -1.57581400  
H 5.39806500 3.96747200 1.76297900  
H 6.43053800 1.47028300 1.79994400  
S -1.41544800 2.50164500 -4.19736000  
N 0.81642100 2.25954300 -2.72214700  
N -1.12455100 1.49186200 -1.72950400  
H -0.59778000 0.77968000 -1.22373800  
F -6.68764900 -0.47911000 -0.63381300  
F -4.94862600 -1.72323100 -1.05591400  
F -5.26209400 -0.91578300 0.94383500  
F -4.68244700 5.14083900 -1.87663400

|    |             |             |             |            |             |             |             |
|----|-------------|-------------|-------------|------------|-------------|-------------|-------------|
| F  | -4.53366500 | 4.96083500  | 0.28056400  | C          | -3.70376500 | -3.10963200 | 2.52200100  |
| F  | -6.35260900 | 4.33033200  | -0.73483300 | C          | -5.97921400 | -4.18223800 | 1.31549400  |
| C  | 1.41132800  | 2.58411100  | -1.39517300 | H          | -4.70234400 | -4.53054800 | -0.39012700 |
| H  | 0.87238100  | 2.00130200  | -0.65325000 | C          | -4.91118400 | -3.14732600 | 3.21737700  |
| C  | 1.21146200  | 4.06848000  | -1.07346300 | H          | -2.84201700 | -2.65229600 | 2.99168000  |
| H  | 1.69429700  | 4.71082600  | -1.81615100 | C          | -6.05162000 | -3.68140700 | 2.61902700  |
| H  | 1.61861000  | 4.30419800  | -0.08723700 | H          | -6.86343500 | -4.60167100 | 0.84349700  |
| H  | 0.14341700  | 4.30013500  | -1.06410400 | H          | -4.96121600 | -2.74583600 | 4.22561100  |
| C  | -0.53512300 | 2.07640400  | -2.83678300 | H          | -6.99235900 | -3.70698500 | 3.16223300  |
| C  | -2.49503000 | 1.58817400  | -1.42247500 | H          | -1.11072100 | -2.87337600 | 2.06676600  |
| C  | -3.23714400 | 0.44911400  | -1.10857700 | <b>A-5</b> |             |             |             |
| H  | -2.77870700 | -0.53165100 | -1.14941200 | C          | 5.50365200  | 1.98056100  | 0.00459500  |
| C  | -4.57665400 | 0.58401800  | -0.74082900 | C          | 4.46387600  | 2.86262100  | 0.41600000  |
| C  | -5.18275300 | 1.83605100  | -0.67058800 | H          | 4.59881700  | 3.79384100  | 0.94861000  |
| H  | -6.22388700 | 1.92780400  | -0.38948800 | C          | 3.20463500  | 2.28481000  | 0.06575200  |
| C  | -4.42815900 | 2.96720500  | -0.98020500 | C          | 3.47839200  | 1.01603400  | -0.56808300 |
| C  | -3.09478800 | 2.84900400  | -1.35701700 | C          | 4.90144300  | 0.84776000  | -0.61294700 |
| H  | -2.51578400 | 3.72967400  | -1.60666200 | H          | 5.41564900  | -0.02261100 | -0.99517900 |
| C  | -5.36844000 | -0.63955400 | -0.37238100 | C          | 1.74614400  | 0.76134200  | -2.72640000 |
| C  | -5.00892200 | 4.34382800  | -0.83790200 | C          | 2.69246300  | 1.49369800  | -3.46168100 |
| Cl | -1.51100600 | -0.43502800 | 1.70614600  | H          | 3.72509900  | 1.53441900  | -3.12940200 |
| H  | 1.21805400  | -2.42750900 | 0.99785700  | C          | 2.30729100  | 2.20965600  | -4.59356800 |
| Ir | 0.62443900  | -0.75772700 | 0.63500000  | H          | 3.04849800  | 2.77560000  | -5.15108600 |
| C  | 1.54661200  | 2.72272100  | -3.89771900 | C          | 0.96757600  | 2.22605300  | -4.99021600 |
| H  | 2.61257200  | 2.57084400  | -3.72733900 | H          | 0.66302100  | 2.80780700  | -5.85492600 |
| H  | 1.23291600  | 2.13894500  | -4.76104800 | C          | 0.01819300  | 1.51867600  | -4.25520400 |
| H  | 1.35040900  | 3.78036000  | -4.11109500 | H          | -1.02851800 | 1.54362800  | -4.53870400 |
| C  | -2.35657900 | -3.62486400 | 0.45186500  | C          | 0.40924800  | 0.78463400  | -3.13698500 |
| C  | -1.15683900 | -4.10106900 | -1.45848800 | H          | -0.33205400 | 0.24112000  | -2.56667800 |
| C  | 0.07552300  | -3.68111300 | -0.88896100 | C          | 3.27235600  | -1.54885200 | -1.80127500 |
| C  | -1.02821200 | -3.48793300 | 1.17763300  | C          | 3.31565700  | -2.70543400 | -1.00578800 |
| H  | -2.10782400 | -5.02959800 | -3.12588000 | H          | 2.73361800  | -2.71935700 | -0.08739000 |
| C  | -1.14974900 | -4.74793500 | -2.69970300 | C          | 4.05933100  | -3.81975800 | -1.39693700 |
| C  | 1.27005300  | -4.03040800 | -1.51552400 | H          | 4.07971800  | -4.70521600 | -0.76752800 |
| H  | -0.70240300 | -4.49796500 | 1.48742700  | C          | 4.76453500  | -3.79654500 | -2.60153500 |
| C  | 1.26010400  | -4.69319900 | -2.74242400 | H          | 5.33777100  | -4.66382500 | -2.91574000 |
| C  | 0.04971100  | -5.03297700 | -3.35029200 | C          | 4.71744000  | -2.65755300 | -3.40830700 |
| H  | 2.20516400  | -3.78874400 | -1.03494100 | H          | 5.25354800  | -2.63866600 | -4.35296500 |
| H  | 2.20432100  | -4.94307700 | -3.21811600 | C          | 3.97662900  | -1.54210800 | -3.01313500 |
| H  | 0.04037200  | -5.53716500 | -4.31196800 | H          | 3.93447000  | -0.67266600 | -3.65912800 |
| N  | -0.03493100 | -2.90348500 | 0.27730300  | P          | 2.22271500  | -0.14430500 | -1.19076100 |
| N  | -2.38097600 | -3.88756100 | -0.81585000 | Fe         | 4.21371100  | 1.00958400  | 1.31358300  |
| C  | -3.62075000 | -3.60540100 | 1.21096600  | C          | 2.89487700  | 0.00592800  | 2.50239900  |
| C  | -4.77739000 | -4.14715000 | 0.62055400  | C          | 3.98138600  | -0.85093100 | 2.10907100  |

|   |             |             |             |    |             |             |             |
|---|-------------|-------------|-------------|----|-------------|-------------|-------------|
| H | 3.90534000  | -1.73353100 | 1.49463300  | H  | 2.41711700  | 4.83604600  | 1.09800100  |
| C | 5.19963000  | -0.29394000 | 2.59156900  | H  | 2.14983400  | 3.56814600  | 2.31318000  |
| C | 4.88994300  | 0.91397100  | 3.28010500  | H  | 0.76944100  | 4.31226200  | 1.49368200  |
| C | 3.47980500  | 1.10084600  | 3.22893300  | C  | -0.03868800 | 3.42566800  | -1.26749300 |
| H | 2.94135800  | 1.94183600  | 3.63607800  | C  | -2.14100900 | 2.32077000  | -0.61340100 |
| C | 0.76126000  | -1.81675900 | 3.06855000  | C  | -2.84145100 | 1.20385300  | -1.07096200 |
| C | -0.32133300 | -1.88192000 | 3.95407200  | H  | -2.31872600 | 0.39919100  | -1.57069400 |
| H | -0.92395400 | -1.00121200 | 4.13659100  | C  | -4.21965900 | 1.11732500  | -0.86633100 |
| C | -0.65472500 | -3.08487000 | 4.57732100  | C  | -4.90892200 | 2.12931700  | -0.20363800 |
| H | -1.50416900 | -3.11760300 | 5.25314700  | H  | -5.97754600 | 2.05766700  | -0.04937900 |
| C | 0.08326100  | -4.24081900 | 4.32279800  | C  | -4.19947400 | 3.24183400  | 0.25117400  |
| H | -0.17848300 | -5.17653200 | 4.80881600  | C  | -2.82740500 | 3.34369700  | 0.04684300  |
| C | 1.15723200  | -4.18926700 | 3.43113900  | H  | -2.28171900 | 4.21079100  | 0.39759400  |
| H | 1.73731300  | -5.08384900 | 3.22088400  | C  | -4.95768500 | -0.10773300 | -1.33230600 |
| C | 1.48838800  | -2.98729500 | 2.80683700  | C  | -4.88230100 | 4.32338800  | 1.03614500  |
| H | 2.31367600  | -2.96819000 | 2.10599100  | Cl | -1.72464800 | -1.09748300 | 1.00603400  |
| C | 0.29505500  | 1.01887600  | 3.13181700  | H  | 1.00109700  | -2.77765200 | -1.58434000 |
| C | 0.64234800  | 1.21695600  | 4.47907300  | Ir | 0.46497100  | -0.79596900 | 0.03916500  |
| H | 1.42115000  | 0.61294000  | 4.93372900  | C  | 2.13757800  | 4.41949100  | -1.68246300 |
| C | -0.02410100 | 2.17071600  | 5.24567400  | H  | 3.18383800  | 4.14753700  | -1.53450300 |
| H | 0.25527200  | 2.31777900  | 6.28525300  | H  | 1.91060800  | 4.40891900  | -2.74722500 |
| C | -1.05991900 | 2.92255800  | 4.68299600  | H  | 1.95920000  | 5.43303800  | -1.30514500 |
| H | -1.58416400 | 3.65998800  | 5.28422300  | C  | -2.14274100 | -3.50000800 | -0.77124900 |
| C | -1.43546700 | 2.70743800  | 3.35737400  | C  | -1.94898300 | -2.59665600 | -2.89043600 |
| H | -2.26870700 | 3.25457400  | 2.92816800  | C  | -0.55933900 | -2.40673900 | -2.78399400 |
| C | -0.76055900 | 1.75769400  | 2.58785900  | C  | -0.63042500 | -3.62399500 | -0.70968400 |
| H | -1.07573700 | 1.56322300  | 1.57470500  | H  | -3.63550300 | -2.50902700 | -4.19179600 |
| P | 1.12694700  | -0.26797400 | 2.11372500  | C  | -2.55964900 | -2.38743300 | -4.13306700 |
| H | 6.56275800  | 2.12214500  | 0.17482000  | C  | 0.21068600  | -2.11259200 | -3.90353000 |
| H | 5.60177000  | 1.59704700  | 3.72433700  | H  | -0.34664900 | -4.59353000 | -1.15284400 |
| H | 6.18964500  | -0.69258300 | 2.41383500  | C  | -0.41042700 | -1.93461000 | -5.14155900 |
| S | -0.78362900 | 4.59772000  | -2.21563500 | C  | -1.79725700 | -2.05254400 | -5.25128200 |
| N | 1.30668800  | 3.42945000  | -1.00486900 | H  | 1.28591000  | -2.00056000 | -3.80713000 |
| N | -0.73640400 | 2.37268200  | -0.72357200 | H  | 0.19149000  | -1.68637800 | -6.01012500 |
| H | -0.25303200 | 1.47883500  | -0.53667600 | H  | -2.28324300 | -1.89729900 | -6.20979500 |
| F | -6.27615800 | 0.14370400  | -1.51804100 | N  | 0.02204400  | -2.52426500 | -1.47115900 |
| F | -4.46887700 | -0.56196600 | -2.50902100 | N  | -2.73218500 | -3.02169600 | -1.81341100 |
| F | -4.87405600 | -1.11773100 | -0.44422600 | C  | -2.95747900 | -4.05832600 | 0.32531000  |
| F | -4.53714300 | 5.55535700  | 0.60670000  | C  | -4.34730100 | -4.17155000 | 0.14785700  |
| F | -4.53462400 | 4.26783300  | 2.35265300  | C  | -2.39516800 | -4.47833400 | 1.54125200  |
| F | -6.22653400 | 4.23163400  | 0.98363300  | C  | -5.14877500 | -4.69295400 | 1.15645100  |
| C | 1.83923000  | 2.89207200  | 0.27326900  | H  | -4.77367500 | -3.82566400 | -0.78565900 |
| H | 1.17654000  | 2.08774500  | 0.57893800  | C  | -3.20079500 | -5.00403900 | 2.54852900  |
| C | 1.79956100  | 3.97145900  | 1.36018200  | H  | -1.33595200 | -4.36430500 | 1.73637100  |

|            |             |             |             |   |             |             |             |
|------------|-------------|-------------|-------------|---|-------------|-------------|-------------|
| C          | -4.57859400 | -5.11584300 | 2.36106700  | C | -2.39057300 | 2.58972200  | -1.64933800 |
| H          | -6.22211200 | -4.76837400 | 1.00630300  | C | -1.63309800 | 2.75382500  | -2.81901800 |
| H          | -2.74736900 | -5.31027900 | 3.48664000  | H | -0.64347000 | 2.31503200  | -2.88493500 |
| H          | -5.20628800 | -5.52219100 | 3.14952000  | C | -2.14875700 | 3.48166900  | -3.89159500 |
| H          | -0.25439300 | -3.58117100 | 0.30872700  | H | -1.55199100 | 3.60036100  | -4.79133500 |
| <b>A-6</b> |             |             |             | C | -3.41999700 | 4.05191200  | -3.81073200 |
| C          | -3.95771000 | -2.41454900 | 2.52624800  | H | -3.82041900 | 4.61477700  | -4.64921200 |
| C          | -2.95800100 | -1.74970800 | 3.28960600  | C | -4.17591700 | 3.89727600  | -2.64745100 |
| H          | -3.03754500 | -1.47601200 | 4.33252400  | H | -5.16550100 | 4.33994100  | -2.57558700 |
| C          | -1.85576000 | -1.43747000 | 2.43652100  | C | -3.66602400 | 3.17056700  | -1.57189100 |
| C          | -2.18314200 | -1.93065800 | 1.11224100  | H | -4.26808300 | 3.05181900  | -0.67796300 |
| C          | -3.48525000 | -2.53355500 | 1.19178400  | C | -0.93598700 | 2.97907900  | 0.82921200  |
| H          | -4.03762300 | -2.94070900 | 0.35857600  | C | -1.72103700 | 4.05704200  | 1.26834000  |
| C          | 0.02746100  | -2.89129100 | -0.55994200 | H | -2.77346600 | 4.10753700  | 1.00804500  |
| C          | 0.36690200  | -3.74829100 | 0.49233000  | C | -1.15155300 | 5.07489300  | 2.03032300  |
| H          | -0.23157600 | -3.75627900 | 1.39529500  | H | -1.76735700 | 5.90400900  | 2.36721000  |
| C          | 1.49337100  | -4.56561700 | 0.39068900  | C | 0.21043600  | 5.03893700  | 2.34497800  |
| H          | 1.77064300  | -5.20408100 | 1.22311900  | H | 0.65412500  | 5.84174100  | 2.92682800  |
| C          | 2.27922600  | -4.53880700 | -0.76341200 | C | 0.99971100  | 3.98081900  | 1.89621100  |
| H          | 3.17185000  | -5.15315000 | -0.82703100 | H | 2.06653300  | 3.96328600  | 2.09845700  |
| C          | 1.93230800  | -3.70343400 | -1.82852400 | C | 0.42759600  | 2.95154700  | 1.14667100  |
| H          | 2.55528500  | -3.66033200 | -2.71512900 | H | 1.04393000  | 2.14131900  | 0.77993000  |
| C          | 0.81175000  | -2.88068300 | -1.72909500 | P | -1.66169700 | 1.66088800  | -0.23119900 |
| H          | 0.55070800  | -2.22011700 | -2.55294700 | H | -4.92910200 | -2.72862900 | 2.88444300  |
| C          | -2.47749100 | -2.12311700 | -1.73421600 | H | -5.27706000 | 1.03935600  | 3.30325200  |
| C          | -2.96656400 | -1.16440700 | -2.63079700 | H | -6.25848900 | -0.09475600 | 1.05554500  |
| H          | -2.61601800 | -0.13983000 | -2.55528400 | S | 3.12693000  | -2.34866500 | 3.06659500  |
| C          | -3.87010400 | -1.53144500 | -3.62961500 | N | 0.51696200  | -1.73684400 | 2.97843600  |
| H          | -4.24256900 | -0.78025800 | -4.32022500 | N | 1.89617800  | -0.46576600 | 1.62006500  |
| C          | -4.27803100 | -2.86113500 | -3.74888200 | H | 1.07418400  | -0.23360800 | 1.02914900  |
| H          | -4.97635600 | -3.14848700 | -4.52969900 | F | 6.24806200  | -1.21912500 | -2.51136200 |
| C          | -3.77012900 | -3.82794700 | -2.87644300 | F | 5.13485900  | -2.84895900 | -1.58400000 |
| H          | -4.06889100 | -4.86708900 | -2.98094300 | F | 4.15088000  | -1.53359000 | -2.99974200 |
| C          | -2.86897000 | -3.46216300 | -1.87707600 | F | 6.21333000  | 2.79386700  | 1.61021100  |
| H          | -2.45958000 | -4.21795100 | -1.21245200 | F | 4.45236700  | 3.74155800  | 0.76724600  |
| P          | -1.27822100 | -1.61742700 | -0.43736700 | F | 6.12787200  | 3.20645600  | -0.52294800 |
| Fe         | -3.54474800 | -0.54412200 | 1.70742400  | C | -0.58034000 | -0.74883700 | 2.85375100  |
| C          | -3.17308900 | 1.19331700  | 0.68327400  | H | -0.32714400 | -0.06099800 | 2.05125500  |
| C          | -4.31634000 | 0.51463400  | 0.13338100  | C | -0.70221800 | 0.06937300  | 4.14433100  |
| H          | -4.39854700 | 0.13668900  | -0.87482700 | H | -0.92354200 | -0.56283500 | 5.00965900  |
| C          | -5.30345100 | 0.40425800  | 1.15309200  | H | -1.49322000 | 0.81767500  | 4.05428800  |
| C          | -4.78489200 | 1.00118600  | 2.34049400  | H | 0.24459300  | 0.58356400  | 4.33227400  |
| C          | -3.47864500 | 1.48963200  | 2.05336700  | C | 1.78609600  | -1.48413800 | 2.52892700  |
| H          | -2.81674000 | 1.99063400  | 2.74344500  | C | 3.10841600  | -0.17639500 | 0.93063700  |

|    |             |             |             |
|----|-------------|-------------|-------------|
| C  | 3.58265600  | -1.04395100 | -0.05022900 |
| H  | 3.10467100  | -2.00453600 | -0.18598600 |
| C  | 4.64157900  | -0.65026400 | -0.86209500 |
| C  | 5.24105000  | 0.59989900  | -0.69521600 |
| H  | 6.04964700  | 0.91135700  | -1.34393800 |
| C  | 4.77214300  | 1.44823100  | 0.30447900  |
| C  | 3.70888700  | 1.06032600  | 1.12200100  |
| H  | 3.32424600  | 1.72210300  | 1.88903900  |
| C  | 5.05332000  | -1.55790900 | -1.98474500 |
| C  | 5.39589000  | 2.79451000  | 0.53154600  |
| Cl | 1.61995100  | 1.41699500  | -1.86820700 |
| Ir | -0.14287200 | 0.23069300  | -0.89114400 |
| C  | 0.32903400  | -2.78776800 | 3.97418300  |
| H  | -0.74207800 | -2.95231700 | 4.10395500  |
| H  | 0.79807600  | -3.70993500 | 3.62910700  |
| H  | 0.78428400  | -2.52600200 | 4.93562500  |

**A-6a**

|   |             |             |             |
|---|-------------|-------------|-------------|
| H | 1.76901700  | 2.69844400  | -0.42491200 |
| H | -0.60514500 | 2.39838000  | -0.28551700 |
| C | -0.46968900 | 0.26506800  | 0.05663000  |
| C | 1.70516300  | -0.54081700 | 0.05824600  |
| C | 2.25604300  | 0.74045900  | -0.16995800 |
| C | 0.05476000  | 1.68684900  | 0.21120000  |
| H | 2.10088100  | -2.60101400 | 0.41607500  |
| C | 2.55584700  | -1.63021100 | 0.25393600  |
| C | 3.64378400  | 0.89423400  | -0.21624700 |
| H | 0.07041000  | 1.94693800  | 1.28665800  |
| C | 4.47397300  | -0.20397100 | -0.01251200 |
| C | 3.93638200  | -1.46856900 | 0.23194700  |
| H | 4.06984600  | 1.87531800  | -0.40801000 |
| H | 5.55012800  | -0.06846800 | -0.04295100 |
| H | 4.58903100  | -2.31939700 | 0.39105700  |
| N | 1.36575900  | 1.77344800  | -0.41226500 |
| N | 0.32421200  | -0.74441500 | 0.02044900  |
| C | -1.92720200 | 0.03280600  | 0.01257600  |
| C | -2.41538300 | -1.25456000 | -0.26606400 |
| C | -2.85096900 | 1.05661800  | 0.26512400  |
| C | -3.77869400 | -1.50316600 | -0.29901900 |
| H | -1.69731800 | -2.04270500 | -0.45288000 |
| C | -4.21995100 | 0.80285400  | 0.23968700  |
| H | -2.51343000 | 2.05940400  | 0.49914600  |
| C | -4.68911300 | -0.47487800 | -0.04627000 |
| H | -4.13798200 | -2.50224700 | -0.52274300 |

|   |             |             |             |
|---|-------------|-------------|-------------|
| H | -4.91914300 | 1.60706300  | 0.44327600  |
| H | -5.75580100 | -0.67123300 | -0.07216000 |

**A-7**

|    |            |             |             |
|----|------------|-------------|-------------|
| C  | 5.93930600 | 0.45320500  | -1.22669800 |
| C  | 5.16660800 | -0.27585100 | -2.17266700 |
| H  | 5.44296900 | -0.46823200 | -3.19971200 |
| C  | 3.92802200 | -0.64958400 | -1.56640000 |
| C  | 3.94181800 | -0.13856000 | -0.21099800 |
| C  | 5.19896700 | 0.52427500  | -0.01623100 |
| H  | 5.51562100 | 1.02064500  | 0.88838900  |
| C  | 3.18470000 | -2.11249900 | 1.60715400  |
| C  | 4.46042100 | -2.23339200 | 2.18135100  |
| H  | 5.06885700 | -1.34888900 | 2.34571700  |
| C  | 4.95075700 | -3.48457300 | 2.54735800  |
| H  | 5.93743500 | -3.56767300 | 2.99419700  |
| C  | 4.17436400 | -4.62762900 | 2.33642700  |
| H  | 4.55838800 | -5.60438300 | 2.61672000  |
| C  | 2.90785100 | -4.51197900 | 1.76396500  |
| H  | 2.30025100 | -5.39252500 | 1.58213500  |
| C  | 2.41176500 | -3.25846700 | 1.40287700  |
| H  | 1.42567100 | -3.17780400 | 0.97203400  |
| C  | 3.00968400 | 0.61518700  | 2.48680000  |
| C  | 3.52568200 | 1.91231300  | 2.38713500  |
| H  | 3.84112900 | 2.29540900  | 1.42717000  |
| C  | 3.61713500 | 2.72624500  | 3.51695500  |
| H  | 4.02055600 | 3.73048800  | 3.42298500  |
| C  | 3.17605200 | 2.25938900  | 4.75445300  |
| H  | 3.24202100 | 2.89477800  | 5.63301400  |
| C  | 2.64302600 | 0.97136500  | 4.85799800  |
| H  | 2.28871500 | 0.60264600  | 5.81625200  |
| C  | 2.55966700 | 0.15158900  | 3.73442000  |
| H  | 2.12370900 | -0.83873700 | 3.81576800  |
| P  | 2.65293000 | -0.44979100 | 1.03599800  |
| Fe | 4.09952600 | 1.38284200  | -1.55342400 |
| C  | 2.31353900 | 2.39283800  | -1.53526800 |
| C  | 3.35786900 | 3.22587100  | -1.00267600 |
| H  | 3.36743500 | 3.66085500  | -0.01527300 |
| C  | 4.35588100 | 3.39670500  | -2.00365500 |
| C  | 3.94074200 | 2.68227300  | -3.16468500 |
| C  | 2.68716800 | 2.06880200  | -2.88019200 |
| H  | 2.11894000 | 1.45481300  | -3.56088000 |
| C  | 0.60702300 | 3.29137400  | 0.49800900  |
| C  | 0.67379400 | 4.61699700  | 0.04123400  |
| H  | 0.80369600 | 4.81861000  | -1.01766600 |



|   |             |             |             |    |             |             |             |
|---|-------------|-------------|-------------|----|-------------|-------------|-------------|
| C | 0.57939900  | 5.67657000  | 0.94085700  | C  | -3.74564500 | -3.07339700 | -0.85101700 |
| H | 0.63046700  | 6.69875500  | 0.57691600  | H  | -4.80138600 | -3.13043000 | -0.62594200 |
| C | 0.42180300  | 5.42498900  | 2.30773600  | C  | -2.85314300 | -4.01922900 | -0.34187400 |
| H | 0.35313100  | 6.25305500  | 3.00760100  | C  | -1.48150200 | -3.93040200 | -0.57605100 |
| C | 0.35734000  | 4.11039700  | 2.76971200  | H  | -0.80054900 | -4.65114600 | -0.14692000 |
| H | 0.25070300  | 3.90449900  | 3.83035200  | C  | -4.12527600 | -0.93244800 | -2.13607200 |
| C | 0.44967500  | 3.04793800  | 1.86826000  | C  | -3.34936600 | -5.10070000 | 0.57665100  |
| H | 0.42182100  | 2.02040600  | 2.21964300  | Cl | -0.30862900 | -1.66000300 | 2.13669500  |
| C | -0.49730600 | 2.09139000  | -1.94059400 | H  | -2.08328400 | 2.25451400  | 1.94458300  |
| C | -0.51751500 | 1.18098000  | -3.01162300 | Ir | 0.46569000  | -0.05659100 | 0.48663800  |
| H | 0.23102700  | 0.39591400  | -3.06970000 | C  | 3.88457700  | -3.59335000 | -1.68032700 |
| C | -1.51669900 | 1.24651500  | -3.97829300 | H  | 4.73927500  | -2.93463400 | -1.51859800 |
| H | -1.52739000 | 0.52958200  | -4.79387500 | H  | 3.84102500  | -4.32108400 | -0.87125500 |
| C | -2.52622000 | 2.20720400  | -3.87409700 | H  | 4.00416400  | -4.13591000 | -2.62484900 |
| H | -3.32211200 | 2.23862800  | -4.61176500 | C  | -4.10888800 | 2.31286800  | 1.16222200  |
| C | -2.52354500 | 3.10075800  | -2.80637100 | C  | -5.21282000 | 0.27517200  | 1.27511700  |
| H | -3.31517100 | 3.83393900  | -2.69761400 | C  | -4.08806600 | -0.37671600 | 1.83542900  |
| C | -1.51241700 | 3.04782100  | -1.84271200 | C  | -3.05513000 | 1.79598000  | 2.13433700  |
| H | -1.54186900 | 3.73966900  | -1.01069500 | H  | -7.24353000 | 0.08664600  | 0.64830500  |
| P | 0.79325800  | 1.86413600  | -0.65123200 | C  | -6.40504000 | -0.43584200 | 1.09817900  |
| H | 6.90324800  | 0.90999100  | -1.40728700 | C  | -4.16903300 | -1.73037300 | 2.18193800  |
| H | 4.49532900  | 2.58571200  | -4.08860200 | H  | -3.35128700 | 2.06893000  | 3.16773500  |
| H | 5.28157700  | 3.94462300  | -1.88817100 | C  | -5.37360200 | -2.41240100 | 2.01925100  |
| S | 1.31772000  | -5.09089600 | -1.77876400 | C  | -6.49736700 | -1.77051000 | 1.48370900  |
| N | 2.67330600  | -2.77675400 | -1.66137400 | H  | -3.28964100 | -2.24038100 | 2.56099300  |
| N | 0.38459300  | -2.57653100 | -1.52257000 | H  | -5.42454500 | -3.46114800 | 2.29263600  |
| H | 0.57703600  | -1.64427900 | -1.10180300 | H  | -7.42872900 | -2.31355300 | 1.35579100  |
| F | -5.43029300 | -1.15682600 | -1.90099600 | N  | -2.92096700 | 0.36339800  | 1.94238200  |
| F | -3.80335300 | 0.25344200  | -1.56134400 | N  | -5.12146100 | 1.59079600  | 0.81978200  |
| F | -3.97809200 | -0.75503000 | -3.47472800 | C  | -4.01115100 | 3.68967200  | 0.63683000  |
| F | -2.72292700 | -6.27539700 | 0.35704700  | C  | -4.93536000 | 4.12395000  | -0.33240700 |
| F | -4.67785800 | -5.31494700 | 0.44312300  | C  | -3.02442700 | 4.58948300  | 1.07158800  |
| F | -3.13387200 | -4.78622900 | 1.88006100  | C  | -4.86514900 | 5.40894600  | -0.85621900 |
| C | 2.80838200  | -1.41296000 | -2.23195700 | H  | -5.69416200 | 3.42199700  | -0.65870800 |
| H | 1.89677900  | -0.86713700 | -2.00070800 | C  | -2.95746500 | 5.88046900  | 0.54475100  |
| C | 2.94695500  | -1.50132100 | -3.75748300 | H  | -2.29610800 | 4.29643100  | 1.81884800  |
| H | 3.82928700  | -2.08052800 | -4.04580000 | C  | -3.87070000 | 6.29457600  | -0.42350500 |
| H | 3.02895400  | -0.50750100 | -4.20655700 | H  | -5.58513700 | 5.72515500  | -1.60638800 |
| H | 2.06636400  | -2.00285400 | -4.16963800 | H  | -2.18355600 | 6.55674500  | 0.89352000  |
| C | 1.45281900  | -3.42072300 | -1.64968000 | H  | -3.81452700 | 7.29811700  | -0.83590700 |
| C | -0.98858000 | -2.88651400 | -1.36329800 | H  | -2.15648400 | -0.09315100 | 2.43147500  |
| C | -1.87810700 | -1.95377400 | -1.89829000 | H  | -1.11461400 | -0.13817600 | -0.27083200 |
| H | -1.49509400 | -1.14212900 | -2.50379600 | H  | -1.30707900 | 0.28978100  | 0.43659500  |
| C | -3.24252900 | -2.03386500 | -1.62529300 |    |             |             |             |

**A-TS4**

|    |            |             |             |   |             |             |             |
|----|------------|-------------|-------------|---|-------------|-------------|-------------|
| C  | 5.85733300 | -0.17889000 | -1.49073100 | H | 1.25941900  | 6.28922100  | 2.80338200  |
| C  | 4.95252600 | -0.84548600 | -2.36296700 | C | 1.02013600  | 4.15106800  | 2.65621700  |
| H  | 5.14058700 | -1.09440500 | -3.39785100 | H | 1.01382900  | 3.98953600  | 3.73002300  |
| C  | 3.72301100 | -1.06604600 | -1.66852500 | C | 0.91167400  | 3.05680600  | 1.79462800  |
| C  | 3.87819200 | -0.52677700 | -0.33380100 | H | 0.82898000  | 2.04625200  | 2.18576800  |
| C  | 5.20726600 | 0.00278700  | -0.24000100 | C | -0.39604900 | 2.09564900  | -1.94349500 |
| H  | 5.63124200 | 0.48748800  | 0.62627300  | C | -0.55061900 | 1.17055700  | -2.98990700 |
| C  | 3.02871100 | -2.36036200 | 1.57495400  | H | 0.10229900  | 0.30414000  | -3.04405300 |
| C  | 4.32333000 | -2.61382900 | 2.05553200  | C | -1.56069500 | 1.32665700  | -3.93477900 |
| H  | 5.03913400 | -1.80140300 | 2.13996900  | H | -1.67522100 | 0.59517400  | -4.72918100 |
| C  | 4.69721900 | -3.90257400 | 2.42938800  | C | -2.45040200 | 2.39943200  | -3.83432700 |
| H  | 5.70108400 | -4.08661600 | 2.80201400  | H | -3.25521800 | 2.50619900  | -4.55522500 |
| C  | 3.78261500 | -4.95399900 | 2.32089900  | C | -2.31617800 | 3.31114900  | -2.79050200 |
| H  | 4.07498200 | -5.96058900 | 2.60666200  | H | -3.01366500 | 4.13571900  | -2.68602800 |
| C  | 2.49614700 | -4.70814300 | 1.84165700  | C | -1.29283800 | 3.16419500  | -1.84970300 |
| H  | 1.78079700 | -5.51763700 | 1.73734700  | H | -1.21734400 | 3.87657600  | -1.03805600 |
| C  | 2.11889100 | -3.41591200 | 1.47261200  | P | 0.90975900  | 1.74956800  | -0.69070500 |
| H  | 1.11846400 | -3.23461600 | 1.10993200  | H | 6.85056100  | 0.16670800  | -1.74513100 |
| C  | 3.22143900 | 0.37520300  | 2.38763400  | H | 4.50225500  | 2.04297800  | -4.31539800 |
| C  | 3.85419800 | 1.61254100  | 2.21981800  | H | 5.51757100  | 3.36054000  | -2.18419800 |
| H  | 4.12605800 | 1.94756900  | 1.22887600  | S | 0.65540700  | -5.20334900 | -1.60157300 |
| C  | 4.12028300 | 2.43005800  | 3.31928700  | N | 2.24280100  | -3.04171700 | -1.60760600 |
| H  | 4.61331500 | 3.38658600  | 3.16924800  | N | -0.00006000 | -2.59890300 | -1.33957500 |
| C  | 3.74031500 | 2.02884400  | 4.59939700  | H | 0.29983900  | -1.67287500 | -0.94994600 |
| H  | 3.94356900 | 2.66619000  | 5.45540000  | F | -5.65915400 | -0.65536300 | -1.82753000 |
| C  | 3.09252300 | 0.80236000  | 4.77402000  | F | -3.90057800 | 0.60494600  | -1.56366000 |
| H  | 2.78634900 | 0.48377100  | 5.76651400  | F | -4.19630600 | -0.46079300 | -3.42910600 |
| C  | 2.83469600 | -0.02028400 | 3.67938300  | F | -3.55200300 | -6.06339600 | 0.27787100  |
| H  | 2.31324700 | -0.96150300 | 3.81936900  | F | -5.35494500 | -4.85564500 | 0.48139500  |
| P  | 2.62859000 | -0.65994500 | 0.98907400  | F | -3.71206700 | -4.61784600 | 1.88774100  |
| Fe | 4.11055200 | 0.93381300  | -1.73797000 | C | 2.48624300  | -1.71882000 | -2.23578400 |
| C  | 2.43229100 | 2.11118800  | -1.66269100 | H | 1.65504100  | -1.07051500 | -1.96745400 |
| C  | 3.57603300 | 2.84908100  | -1.19823900 | C | 2.51641200  | -1.87031100 | -3.76228400 |
| H  | 3.67487200 | 3.29826100  | -0.22220900 | H | 3.31077500  | -2.55174800 | -4.08152400 |
| C  | 4.53873400 | 2.90370800  | -2.24598400 | H | 2.67683600  | -0.90586800 | -4.25229100 |
| C  | 4.00297000 | 2.21114800  | -3.37033300 | H | 1.56221400  | -2.28413300 | -4.10199300 |
| C  | 2.71060100 | 1.72792100  | -3.01541200 | C | 0.96565400  | -3.55122900 | -1.51152600 |
| H  | 2.05628700 | 1.15784600  | -3.65575400 | C | -1.39541500 | -2.76292500 | -1.19601400 |
| C  | 0.94577100 | 3.23760000  | 0.40597100  | C | -2.18295100 | -1.73762100 | -1.72404800 |
| C  | 1.09994900 | 4.53437000  | -0.10860100 | H | -1.70794100 | -0.93070600 | -2.26567100 |
| H  | 1.14772700 | 4.68739700  | -1.18233100 | C | -3.56254900 | -1.72916400 | -1.53372800 |
| C  | 1.20644800 | 5.62635500  | 0.75028500  | C | -4.18440500 | -2.75558500 | -0.83023400 |
| H  | 1.32504300 | 6.62517000  | 0.33977000  | H | -5.25366700 | -2.74808800 | -0.67427200 |
| C  | 1.16705000 | 5.43703200  | 2.13564300  | C | -3.39148800 | -3.77193900 | -0.29579200 |

|                |             |             |             |    |             |             |             |
|----------------|-------------|-------------|-------------|----|-------------|-------------|-------------|
| C              | -2.00645100 | -3.78334000 | -0.46152500 | C  | -0.05565000 | -2.87451300 | -1.57304900 |
| H              | -1.40426600 | -4.56681300 | -0.02467700 | C  | 0.10006200  | -2.79295100 | -0.12944500 |
| C              | -4.33816900 | -0.56906600 | -2.08410100 | C  | 0.24271600  | -4.13676500 | 0.35762200  |
| C              | -4.00536300 | -4.82974800 | 0.57519300  | H  | 0.36980500  | -4.41405900 | 1.39253100  |
| Cl             | -0.36274400 | -1.51081700 | 2.33540600  | C  | -1.73094600 | -1.20514800 | 1.39011900  |
| H              | -1.60053900 | 2.40788200  | 1.88027000  | C  | -2.22470700 | -0.06094100 | 2.03707900  |
| Ir             | 0.47334700  | -0.06945800 | 0.53015200  | H  | -1.59538000 | 0.81541500  | 2.12881600  |
| C              | 3.36138900  | -3.97965200 | -1.65633500 | C  | -3.52651100 | -0.03535000 | 2.53808700  |
| H              | 4.28458200  | -3.41098300 | -1.53482800 | H  | -3.90281600 | 0.86570400  | 3.01129500  |
| H              | 3.27248400  | -4.68908200 | -0.83515800 | C  | -4.35887000 | -1.14392600 | 2.38224100  |
| H              | 3.39038600  | -4.54294500 | -2.59606700 | H  | -5.38340900 | -1.11721300 | 2.73905400  |
| C              | -3.65327600 | 2.69013000  | 1.21599700  | C  | -3.88713300 | -2.27177000 | 1.71213900  |
| C              | -4.93218600 | 0.75664500  | 1.31848900  | H  | -4.54682900 | -3.11755500 | 1.54496900  |
| C              | -3.88020200 | -0.02306500 | 1.83029100  | C  | -2.57965400 | -2.30890800 | 1.22663500  |
| C              | -2.60350400 | 2.04397400  | 2.10787000  | H  | -2.23372500 | -3.19047600 | 0.70267100  |
| H              | -7.00313600 | 0.79717700  | 0.80306100  | C  | 0.75946800  | -1.80301200 | 2.55939000  |
| C              | -6.20572100 | 0.18765900  | 1.21481900  | C  | 1.79840700  | -2.73250900 | 2.68812000  |
| C              | -4.08049600 | -1.34505600 | 2.21236200  | H  | 2.16225300  | -3.24480700 | 1.81331500  |
| H              | -2.81949400 | 2.27340600  | 3.16269100  | C  | 2.37402800  | -3.00881500 | 3.92767300  |
| C              | -5.36575700 | -1.88632500 | 2.12950800  | H  | 3.18129000  | -3.73305600 | 3.99210600  |
| C              | -6.42602100 | -1.12233800 | 1.63479700  | C  | 1.93217600  | -2.34482100 | 5.06982200  |
| H              | -3.24178000 | -1.94556200 | 2.54900400  | H  | 2.38290700  | -2.55248200 | 6.03610300  |
| H              | -5.52464100 | -2.91687500 | 2.42470800  | C  | 0.90744700  | -1.40432500 | 4.95614900  |
| H              | -7.41915300 | -1.55479700 | 1.56079800  | H  | 0.54960800  | -0.87712700 | 5.83641100  |
| N              | -2.58957600 | 0.58946800  | 1.88220900  | C  | 0.32651800  | -1.13776100 | 3.71729300  |
| N              | -4.73313900 | 2.07061900  | 0.88452400  | H  | -0.47571600 | -0.41311100 | 3.66170500  |
| C              | -3.45999500 | 4.08031800  | 0.76030600  | P  | 0.05089100  | -1.29583600 | 0.91589000  |
| C              | -4.37293300 | 4.63059200  | -0.15878600 | Fe | 1.75621100  | -3.63555300 | -0.99087600 |
| C              | -2.39611100 | 4.87572800  | 1.21406200  | C  | 3.30224500  | -2.27914700 | -0.80760400 |
| C              | -4.21695900 | 5.93241400  | -0.61765700 | C  | 3.63551500  | -3.49750600 | -0.11837200 |
| H              | -5.18969300 | 4.00621600  | -0.50177300 | H  | 3.87317500  | -3.58424700 | 0.92962800  |
| C              | -2.24779300 | 6.18570400  | 0.75713900  | C  | 3.61758700  | -4.57235800 | -1.05243700 |
| H              | -1.66872400 | 4.48864200  | 1.91832600  | C  | 3.28586900  | -4.03799600 | -2.33070400 |
| C              | -3.15064500 | 6.71675600  | -0.16245200 | C  | 3.09113400  | -2.63482300 | -2.18127100 |
| H              | -4.92594900 | 6.34063100  | -1.33258200 | H  | 2.80108400  | -1.95590800 | -2.96861800 |
| H              | -1.41686900 | 6.78221800  | 1.11813000  | C  | 3.96583500  | -0.65797700 | 1.47327200  |
| H              | -3.02857600 | 7.73424600  | -0.52281800 | C  | 5.15356700  | -1.37918000 | 1.67330900  |
| H              | -1.96909600 | 0.09472700  | 2.53516500  | H  | 5.60652000  | -1.91883300 | 0.84766600  |
| H              | -1.16324600 | 0.22416100  | 0.03444200  | C  | 5.76201800  | -1.39965300 | 2.92773200  |
| H              | -1.75277300 | 0.38113200  | 0.81796700  | H  | 6.67908700  | -1.96374200 | 3.07424300  |
| <b>A-TS4-1</b> |             |             |             | C  | 5.19405600  | -0.69357600 | 3.99193400  |
| C              | 0.20761800  | -5.02812400 | -0.74311100 | H  | 5.66466100  | -0.71721900 | 4.97109900  |
| C              | 0.01300000  | -4.25786100 | -1.91816100 | C  | 4.02469000  | 0.03994200  | 3.79420300  |
| H              | -0.04265000 | -4.65173900 | -2.92113700 | H  | 3.57502700  | 0.58921700  | 4.61502000  |

|   |             |             |             |                |             |             |             |
|---|-------------|-------------|-------------|----------------|-------------|-------------|-------------|
| C | 3.41460500  | 0.05974400  | 2.54096800  | C              | -7.58526700 | -1.61338700 | -0.00321700 |
| H | 2.49987000  | 0.61839900  | 2.37155600  | Ir             | 1.13191900  | 0.45603300  | -0.12140800 |
| C | 4.33509700  | 0.34257500  | -1.20964700 | H              | 1.81677600  | 1.50492300  | -1.24745900 |
| C | 3.99252700  | 0.61159400  | -2.54493300 | Cl             | -0.81720500 | 1.98358400  | -0.06886100 |
| H | 3.02383100  | 0.30000700  | -2.92153500 | H              | 2.04939900  | 2.35505100  | -0.66901100 |
| C | 4.85826400  | 1.31753100  | -3.37617000 | C              | -0.93739800 | 0.49432200  | -3.07859000 |
| H | 4.57892300  | 1.50646800  | -4.40950500 | H              | -1.76949500 | 1.17768400  | -2.93631300 |
| C | 6.07528900  | 1.79492100  | -2.88047800 | H              | -0.04079100 | 0.94692100  | -2.65337700 |
| H | 6.74602300  | 2.35580200  | -3.52496900 | H              | -0.80008200 | 0.35365200  | -4.15842000 |
| C | 6.41615100  | 1.55198200  | -1.55169500 | H              | -0.51304900 | 4.20351400  | 1.38767100  |
| H | 7.35485700  | 1.92574800  | -1.15210900 | H              | 1.04381700  | 6.23518200  | -0.04882700 |
| C | 5.55531100  | 0.82529400  | -0.72292800 | C              | 1.13865500  | 4.27591300  | -0.88473900 |
| H | 5.83854200  | 0.64210600  | 0.30706800  | C              | 2.40278400  | 3.78601800  | 1.04102200  |
| P | 3.10922200  | -0.56432800 | -0.15066700 | C              | 1.43390500  | 4.34881700  | 1.89357400  |
| H | 0.33658000  | -6.10138400 | -0.69743700 | C              | 0.43215800  | 5.32061200  | -0.04935600 |
| H | 3.15423300  | -4.60097400 | -3.24518900 | H              | 4.32567500  | 2.85262800  | 0.86663600  |
| H | 3.79412200  | -5.61446000 | -0.82096400 | C              | 3.60614000  | 3.29241900  | 1.55012800  |
| S | -3.12144800 | -2.66985200 | -2.24297600 | C              | 1.66224100  | 4.35150200  | 3.27055400  |
| N | -1.20641500 | -0.79717800 | -2.43722000 | H              | -0.53726700 | 5.58487300  | -0.47157200 |
| N | -3.06540300 | -0.08475500 | -1.37440400 | C              | 2.86009300  | 3.84822100  | 3.77957400  |
| H | -2.39390800 | 0.61553500  | -1.05171600 | C              | 3.84102600  | 3.34020500  | 2.92081900  |
| F | -7.15592100 | 3.35977200  | 1.21974600  | H              | 0.90607700  | 4.77428900  | 3.92494500  |
| F | -5.46763600 | 2.80909100  | 2.46953000  | H              | 3.03695400  | 3.86957300  | 4.85112500  |
| F | -5.13260300 | 3.92323700  | 0.63466500  | H              | 4.77123000  | 2.95268900  | 3.32211000  |
| F | -7.28247100 | -2.40665100 | 1.06010600  | N              | 0.24602300  | 4.88325800  | 1.33131200  |
| F | -7.65026100 | -2.41883200 | -1.08189000 | N              | 2.09996000  | 3.59644600  | -0.32270600 |
| F | -8.82541400 | -1.12487300 | 0.21914200  | C              | 0.81371900  | 3.98682000  | -2.28178700 |
| C | -0.10923200 | -1.76340800 | -2.60684000 | C              | 1.79312700  | 3.40813600  | -3.11079400 |
| H | 0.76976100  | -1.13674300 | -2.41442800 | C              | -0.46540500 | 4.23210200  | -2.81042900 |
| C | -0.04021600 | -2.30680200 | -4.04242700 | C              | 1.49352800  | 3.07050700  | -4.42705500 |
| H | -0.92116500 | -2.91424100 | -4.26242300 | H              | 2.78984300  | 3.24214900  | -2.71895600 |
| H | 0.86129100  | -2.91036100 | -4.18462100 | C              | -0.76006400 | 3.89314300  | -4.12685600 |
| H | -0.00298100 | -1.48313100 | -4.76048900 | H              | -1.24716000 | 4.63656700  | -2.17790300 |
| C | -2.46564000 | -1.14123500 | -2.01563400 | C              | 0.21681500  | 3.30947100  | -4.93910700 |
| C | -4.33597400 | 0.11085200  | -0.83378100 | H              | 2.26038500  | 2.62551700  | -5.05451100 |
| C | -4.53658900 | 1.35583600  | -0.21166400 | H              | -1.75701600 | 4.07236000  | -4.51794200 |
| H | -3.73260500 | 2.08338600  | -0.20830800 | H              | -0.01733000 | 3.04684400  | -5.96668000 |
| C | -5.73404000 | 1.64042200  | 0.43025800  | <b>A-TS4-2</b> |             |             |             |
| C | -6.76362900 | 0.69946500  | 0.47351800  | C              | -0.42988500 | -4.43088600 | -0.77069600 |
| H | -7.69280400 | 0.91502900  | 0.98570700  | C              | -0.80463000 | -3.58363300 | -1.84359200 |
| C | -6.56309300 | -0.52426800 | -0.15977500 | H              | -1.14374800 | -3.90321000 | -2.81708100 |
| C | -5.37421300 | -0.82810000 | -0.82158700 | C              | -0.65993400 | -2.22715100 | -1.44143200 |
| H | -5.22768100 | -1.79539000 | -1.27800700 | C              | -0.14134000 | -2.23116700 | -0.09028800 |
| C | -5.87541000 | 2.93354000  | 1.17865900  | C              | -0.03845500 | -3.61038300 | 0.31805200  |

|    |             |             |             |    |              |             |             |
|----|-------------|-------------|-------------|----|--------------|-------------|-------------|
| H  | 0.29699800  | -3.96478400 | 1.27810000  | C  | 5.03804800   | -0.13567000 | -2.51502000 |
| C  | -1.37646000 | -0.10013400 | 1.33878500  | H  | 4.37664800   | -0.76176200 | -3.09857500 |
| C  | -1.52229400 | 1.23011100  | 1.74491300  | C  | 6.09361900   | 0.52647600  | -3.14588100 |
| H  | -0.67564300 | 1.90088500  | 1.69830500  | H  | 6.23592600   | 0.40491100  | -4.21600800 |
| C  | -2.74688000 | 1.68351500  | 2.24377300  | C  | 6.95610100   | 1.34044700  | -2.41274400 |
| H  | -2.84032800 | 2.71551600  | 2.57067600  | H  | 7.77570100   | 1.85425100  | -2.90692600 |
| C  | -3.83377500 | 0.81264000  | 2.33934600  | C  | 6.75746700   | 1.49585200  | -1.03791800 |
| H  | -4.78593500 | 1.16259200  | 2.72603400  | H  | 7.41684500   | 2.13546800  | -0.45843300 |
| C  | -3.69923400 | -0.50971800 | 1.90565500  | C  | 5.70913100   | 0.83258100  | -0.40683000 |
| H  | -4.54947000 | -1.18381100 | 1.93542300  | H  | 5.56305600   | 0.95888100  | 0.66159700  |
| C  | -2.47882300 | -0.96700900 | 1.41444900  | P  | 3.50445900   | -0.83431800 | -0.19042500 |
| H  | -2.38791700 | -1.99511700 | 1.08376500  | H  | -0.41075300  | -5.51250200 | -0.78614800 |
| C  | 0.62049700  | -1.64774700 | 2.57346800  | H  | 1.86251000   | -3.85834700 | -3.94812200 |
| C  | 1.65525800  | -2.58646000 | 2.66815900  | H  | 2.63994700   | -5.52453800 | -1.96843400 |
| H  | 2.23757200  | -2.83601500 | 1.79144000  | S  | -3.80835600  | -2.23952900 | -1.80084600 |
| C  | 1.94958100  | -3.21240300 | 3.87867300  | N  | -2.07612400  | -0.17247300 | -1.85192000 |
| H  | 2.76238500  | -3.93108200 | 3.92446100  | N  | -4.19411200  | 0.36488000  | -1.19690800 |
| C  | 1.21382000  | -2.90073100 | 5.02295600  | H  | -3.72933700  | 1.17363500  | -0.80718800 |
| H  | 1.44276900  | -3.38349400 | 5.96877300  | F  | -9.04003100  | 2.55549400  | 1.56739000  |
| C  | 0.17950400  | -1.96761400 | 4.94133300  | F  | -7.22950600  | 2.08245300  | 2.67838500  |
| H  | -0.40093100 | -1.71741200 | 5.82486000  | F  | -7.18771000  | 3.62964400  | 1.15726300  |
| C  | -0.11721600 | -1.34707100 | 3.72749900  | F  | -8.82630200  | -2.61442800 | -0.69013100 |
| H  | -0.91801800 | -0.62083500 | 3.68714700  | F  | -8.48982100  | -1.93350700 | -2.72545300 |
| P  | 0.28606800  | -0.79677400 | 0.96425100  | F  | -10.05962700 | -1.02776300 | -1.51495000 |
| Fe | 1.16821700  | -3.21009000 | -1.30348100 | C  | -0.94705200  | -1.02952400 | -2.31019400 |
| C  | 3.01783800  | -2.26405300 | -1.21970400 | H  | -0.08221300  | -0.37975200 | -2.20838900 |
| C  | 3.14358800  | -3.65015500 | -0.85807600 | C  | -1.08580800  | -1.35990200 | -3.79894200 |
| H  | 3.51264700  | -4.02266800 | 0.08626800  | H  | -1.96996600  | -1.96971000 | -3.99641500 |
| C  | 2.69775500  | -4.44421800 | -1.95311200 | H  | -0.19447000  | -1.89277100 | -4.14458500 |
| C  | 2.28846500  | -3.56380500 | -2.99817300 | H  | -1.16515100  | -0.42932000 | -4.36974300 |
| C  | 2.46643600  | -2.22352100 | -2.54757100 | C  | -3.33375400  | -0.63531100 | -1.62517500 |
| H  | 2.19986300  | -1.32069900 | -3.07526200 | C  | -5.55217300  | 0.33031000  | -0.85981600 |
| C  | 4.60241100  | -1.64212400 | 1.06277800  | C  | -5.99465700  | 1.32935600  | 0.01786800  |
| C  | 5.69896600  | -2.40429400 | 0.62236000  | H  | -5.28791500  | 2.05597800  | 0.40305700  |
| H  | 5.86418800  | -2.54326200 | -0.44139000 | C  | -7.32417000  | 1.38595000  | 0.42394500  |
| C  | 6.57851800  | -2.97423300 | 1.53800100  | C  | -8.25471300  | 0.46847000  | -0.05663800 |
| H  | 7.41742200  | -3.56611200 | 1.18306200  | H  | -9.29017300  | 0.51249800  | 0.25480700  |
| C  | 6.38872100  | -2.77679700 | 2.91014400  | C  | -7.82018700  | -0.49511300 | -0.96723600 |
| H  | 7.07969100  | -3.21644300 | 3.62386900  | C  | -6.49012300  | -0.57578700 | -1.37668600 |
| C  | 5.31358100  | -2.01126700 | 3.35517600  | H  | -6.18045600  | -1.33177500 | -2.08101400 |
| H  | 5.15266400  | -1.85334900 | 4.41773000  | C  | -7.70636800  | 2.41505700  | 1.44792100  |
| C  | 4.42697000  | -1.44756700 | 2.43371700  | C  | -8.79940700  | -1.51727500 | -1.48017100 |
| H  | 3.57883200  | -0.88221700 | 2.78550800  | Ir | 1.86041800   | 0.74281300  | 0.37153800  |
| C  | 4.84302000  | 0.00392000  | -1.13870900 | H  | 0.48297200   | 2.26091700  | -0.00379500 |

|            |             |             |             |    |             |             |             |
|------------|-------------|-------------|-------------|----|-------------|-------------|-------------|
| Cl         | 1.66209000  | 1.00280500  | -2.13532900 | H  | 5.01453200  | -2.17476600 | 2.07280400  |
| H          | 0.71268000  | 3.07602500  | -0.34745000 | C  | 4.47462100  | -4.23078400 | 2.38880400  |
| C          | -1.81354800 | 1.27321300  | -1.89357300 | H  | 5.47149100  | -4.51775100 | 2.71243900  |
| H          | -1.82851200 | 1.71359500  | -0.88851700 | C  | 3.45330400  | -5.18369100 | 2.32885300  |
| H          | -0.81324600 | 1.44244000  | -2.28710400 | H  | 3.65522400  | -6.21543400 | 2.60323500  |
| H          | -2.54561400 | 1.78111100  | -2.53069300 | C  | 2.17753600  | -4.80743300 | 1.90963600  |
| H          | 0.49183800  | 5.38845700  | 2.23512600  | H  | 1.38098900  | -5.54144100 | 1.84009000  |
| H          | 2.66617500  | 5.59150000  | 0.99034100  | C  | 1.91840100  | -3.48269800 | 1.55222300  |
| C          | 2.22363600  | 3.87162500  | -0.21617600 | H  | 0.92801100  | -3.19939100 | 1.22591100  |
| C          | 2.19410800  | 2.62103300  | 1.74100300  | C  | 3.28437600  | 0.16706800  | 2.48755200  |
| C          | 1.22593500  | 3.49673300  | 2.36314600  | C  | 3.89001000  | 1.42145600  | 2.34027900  |
| C          | 1.77095600  | 5.07183800  | 0.59722900  | H  | 4.11480200  | 1.79211400  | 1.34989500  |
| H          | 3.64723400  | 1.12344500  | 2.28903300  | C  | 4.19272200  | 2.20310500  | 3.45528000  |
| C          | 2.59795100  | 1.38496900  | 2.38419300  | H  | 4.66378600  | 3.17293200  | 3.31922200  |
| C          | 0.67065800  | 3.12320700  | 3.56624000  | C  | 3.87879800  | 1.74781500  | 4.73625100  |
| H          | 1.23789200  | 5.78088700  | -0.03681200 | H  | 4.11041600  | 2.35676500  | 5.60571100  |
| C          | 1.03196200  | 1.88978800  | 4.18661800  | C  | 3.26226000  | 0.50382900  | 4.89279600  |
| C          | 1.96849000  | 1.05787000  | 3.64452000  | H  | 3.00931600  | 0.14206000  | 5.88567300  |
| H          | -0.06463100 | 3.76868700  | 4.04060400  | C  | 2.96718500  | -0.28184400 | 3.77948900  |
| H          | 0.56234700  | 1.63162900  | 5.13181500  | H  | 2.47669000  | -1.24089400 | 3.90985400  |
| H          | 2.26944400  | 0.15934200  | 4.17145800  | P  | 2.64308900  | -0.78849400 | 1.05125000  |
| N          | 0.88066400  | 4.64377200  | 1.66971700  | Fe | 4.28742000  | 0.77608300  | -1.61919800 |
| N          | 2.73397900  | 2.82867200  | 0.50181300  | C  | 2.68102400  | 2.06419600  | -1.59837100 |
| C          | 2.69657900  | 4.11312400  | -1.58545000 | C  | 3.85174700  | 2.72201700  | -1.08544100 |
| C          | 3.84347500  | 3.46622000  | -2.07411700 | H  | 3.94186300  | 3.16167500  | -0.10407000 |
| C          | 2.01424000  | 5.00009900  | -2.43841100 | C  | 4.85739800  | 2.71755900  | -2.09378200 |
| C          | 4.29015200  | 3.69995700  | -3.37103400 | C  | 4.32246100  | 2.06552400  | -3.24252600 |
| H          | 4.37325800  | 2.78256100  | -1.42648100 | C  | 2.98795200  | 1.66718300  | -2.94058900 |
| C          | 2.45877600  | 5.22623800  | -3.73667100 | H  | 2.32420500  | 1.14288300  | -3.60973200 |
| H          | 1.10252600  | 5.48372300  | -2.09946900 | C  | 1.16349400  | 3.27251100  | 0.41116400  |
| C          | 3.60217900  | 4.57740400  | -4.21040600 | C  | 1.41860000  | 4.55819900  | -0.08965700 |
| H          | 5.17872100  | 3.18680700  | -3.72369100 | H  | 1.55688900  | 4.70353800  | -1.15687100 |
| H          | 1.90819200  | 5.90439100  | -4.38308900 | C  | 1.50464000  | 5.64931800  | 0.77387000  |
| H          | 3.95099400  | 4.75506900  | -5.22396800 | H  | 1.70286200  | 6.64014800  | 0.37403400  |
| <b>A-8</b> |             |             |             | C  | 1.34485900  | 5.46802700  | 2.15176000  |
| C          | 5.95860900  | -0.43141000 | -1.34426800 | H  | 1.42178600  | 6.31804000  | 2.82440100  |
| C          | 5.03720300  | -1.04088900 | -2.24229200 | C  | 1.10158100  | 4.19108700  | 2.65981000  |
| H          | 5.23228800  | -1.28691700 | -3.27677100 | H  | 1.00178900  | 4.03658200  | 3.73040900  |
| C          | 3.78403600  | -1.20047300 | -1.57220300 | C  | 1.01201500  | 3.09911300  | 1.79311900  |
| C          | 3.94411600  | -0.69291000 | -0.22743800 | H  | 0.84987700  | 2.09284900  | 2.17243000  |
| C          | 5.29292500  | -0.22878800 | -0.10339200 | C  | -0.13666400 | 2.21549400  | -1.98091200 |
| H          | 5.71744400  | 0.23189600  | 0.77651900  | C  | -0.31477500 | 1.32181300  | -3.04979000 |
| C          | 2.93449800  | -2.52462000 | 1.60588800  | H  | 0.30208100  | 0.43000600  | -3.11526300 |
| C          | 4.21678500  | -2.91037800 | 2.02750500  | C  | -1.30649400 | 1.53893100  | -4.00342800 |

|    |             |             |             |            |             |             |             |
|----|-------------|-------------|-------------|------------|-------------|-------------|-------------|
| H  | -1.43541700 | 0.83193200  | -4.81799500 | H          | 3.07433800  | -4.77320200 | -0.73524900 |
| C  | -2.15627300 | 2.64255000  | -3.89097800 | H          | 3.25981600  | -4.64221100 | -2.49194000 |
| H  | -2.94612600 | 2.79696200  | -4.61996000 | C          | -3.85191600 | 2.54732000  | 1.26265100  |
| C  | -1.99931600 | 3.52514000  | -2.82475100 | C          | -5.28600400 | 0.73470700  | 1.47417400  |
| H  | -2.66608800 | 4.37441700  | -2.70962200 | C          | -4.25369200 | -0.18785400 | 1.69727200  |
| C  | -0.99260200 | 3.31694700  | -1.87824300 | C          | -2.74157200 | 1.72797100  | 1.90250500  |
| H  | -0.90009700 | 4.00680600  | -1.04944600 | H          | -7.40869200 | 0.98346200  | 1.41222900  |
| P  | 1.10494200  | 1.78045700  | -0.68363500 | C          | -6.60442000 | 0.27875600  | 1.59441000  |
| H  | 6.97279300  | -0.13444900 | -1.57708000 | C          | -4.48353500 | -1.51435600 | 2.02080100  |
| H  | 4.84709000  | 1.86715000  | -4.16788400 | H          | -2.79244500 | 1.76782700  | 2.99641300  |
| H  | 5.86099200  | 3.10858900  | -1.99051700 | C          | -5.80645500 | -1.94665400 | 2.14542400  |
| S  | 0.47396400  | -5.14264100 | -1.59152600 | C          | -6.85784000 | -1.04995000 | 1.93301400  |
| N  | 2.16837400  | -3.07246200 | -1.54867700 | H          | -3.65288900 | -2.19969200 | 2.14860500  |
| N  | -0.05571800 | -2.50001800 | -1.34074500 | H          | -6.00409600 | -2.98655100 | 2.37866300  |
| H  | 0.28635900  | -1.57848700 | -0.95033800 | H          | -7.88411200 | -1.39323900 | 2.02090800  |
| F  | -5.53185300 | -0.08167200 | -1.69388100 | N          | -2.90205400 | 0.30910800  | 1.48912400  |
| F  | -3.65610800 | 0.98809400  | -1.39794600 | N          | -5.03542100 | 2.05830200  | 1.09752600  |
| F  | -4.11437800 | 0.11290300  | -3.33266800 | C          | -3.55920400 | 3.91697900  | 0.81035800  |
| F  | -3.90344500 | -5.87028300 | -0.28559100 | C          | -4.46631600 | 4.56183800  | -0.04973100 |
| F  | -5.64120900 | -4.57472400 | -0.05570900 | C          | -2.39073700 | 4.59203000  | 1.19912500  |
| F  | -4.08631600 | -4.60036200 | 1.46463200  | C          | -4.20236900 | 5.84327500  | -0.51767700 |
| C  | 2.51509000  | -1.76517000 | -2.16414300 | H          | -5.36201900 | 4.02821600  | -0.34591700 |
| H  | 1.72619400  | -1.06241500 | -1.90142900 | C          | -2.13611000 | 5.88313000  | 0.73851000  |
| C  | 2.56364200  | -1.91492500 | -3.68998700 | H          | -1.66553700 | 4.12598200  | 1.85676700  |
| H  | 3.31556400  | -2.64864600 | -3.99653800 | C          | -3.03453000 | 6.50806100  | -0.12653000 |
| H  | 2.80080200  | -0.96224300 | -4.17170900 | H          | -4.90409100 | 6.32666300  | -1.19135600 |
| H  | 1.59012900  | -2.25997200 | -4.05140500 | H          | -1.22605500 | 6.38528400  | 1.04712400  |
| C  | 0.86396900  | -3.50543300 | -1.48632100 | H          | -2.82789600 | 7.50838700  | -0.49619900 |
| C  | -1.45706600 | -2.57714400 | -1.25657400 | H          | -2.16344100 | -0.29860400 | 1.95628200  |
| C  | -2.15223300 | -1.43822400 | -1.68728800 | H          | -0.95761800 | 0.55863800  | 0.08888700  |
| H  | -1.59818900 | -0.60543300 | -2.10033200 | H          | -2.60715400 | 0.24687700  | 0.49633100  |
| C  | -3.53856700 | -1.36140600 | -1.56380100 | <b>A-9</b> |             |             |             |
| C  | -4.26774400 | -2.42005400 | -1.02615600 | C          | 4.85730000  | 3.24667300  | 1.44221400  |
| H  | -5.34192000 | -2.35620000 | -0.92170100 | C          | 3.55478400  | 3.65148400  | 1.84625800  |
| C  | -3.57072400 | -3.54479800 | -0.58819800 | H          | 3.32844200  | 4.33110600  | 2.65560900  |
| C  | -2.18065500 | -3.63208100 | -0.68570700 | C          | 2.59255100  | 2.94611100  | 1.05927600  |
| H  | -1.65698200 | -4.50453700 | -0.32343200 | C          | 3.32050800  | 2.09440400  | 0.14098300  |
| C  | -4.22031600 | -0.10039100 | -2.00437800 | C          | 4.71645400  | 2.30851100  | 0.38388500  |
| C  | -4.30201500 | -4.65042400 | 0.11827700  | H          | 5.52838000  | 1.81903400  | -0.13186600 |
| Cl | -0.57123100 | -1.38020700 | 2.25324800  | C          | 2.47371300  | 2.23279400  | -2.51270700 |
| H  | -1.74356500 | 2.01811600  | 1.57491700  | C          | 3.67707600  | 2.69632900  | -3.06764700 |
| Ir | 0.54098200  | 0.00646800  | 0.50316600  | H          | 4.62443100  | 2.31661200  | -2.69575600 |
| C  | 3.23181100  | -4.07416600 | -1.55501800 | C          | 3.66670500  | 3.63350700  | -4.09809200 |
| H  | 4.18089200  | -3.55835400 | -1.40412700 | H          | 4.60497000  | 3.98492800  | -4.51902500 |

|    |             |             |             |    |             |             |             |
|----|-------------|-------------|-------------|----|-------------|-------------|-------------|
| C  | 2.45044400  | 4.11864700  | -4.58870400 | C  | -1.42813300 | -2.62635100 | 3.98282100  |
| H  | 2.44133300  | 4.84920500  | -5.39313600 | H  | -1.77204200 | -3.61493900 | 4.27461600  |
| C  | 1.25164100  | 3.66166600  | -4.04287600 | C  | -0.35584800 | -2.50381600 | 3.09755900  |
| H  | 0.29939200  | 4.03441900  | -4.40848200 | H  | 0.11993900  | -3.39589400 | 2.70596000  |
| C  | 1.26253900  | 2.72270500  | -3.00884100 | P  | 1.44867700  | -1.00609000 | 1.46438700  |
| H  | 0.32700500  | 2.37777500  | -2.59336000 | H  | 5.79050300  | 3.56791300  | 1.88588000  |
| C  | 3.78088000  | -0.15782300 | -1.72483500 | H  | 3.97217000  | 1.89603000  | 4.88101300  |
| C  | 4.86947000  | -0.64491900 | -0.99396000 | H  | 5.85738500  | 0.45968500  | 3.57671800  |
| H  | 5.10396100  | -0.22182800 | -0.02821400 | S  | -1.82836200 | 4.06801200  | -1.33914200 |
| C  | 5.64556100  | -1.69972500 | -1.48251500 | N  | 0.41975800  | 3.55697100  | 0.02089200  |
| H  | 6.48334200  | -2.06414600 | -0.89402200 | N  | -1.24391000 | 1.99218100  | 0.31555500  |
| C  | 5.34087100  | -2.28927900 | -2.70722300 | H  | -0.54680700 | 1.18976300  | 0.18082700  |
| H  | 5.94248800  | -3.11129900 | -3.08537900 | F  | -5.31189600 | -2.17135300 | 0.79269400  |
| C  | 4.25384900  | -1.81100300 | -3.44723000 | F  | -3.18866400 | -2.46303400 | 1.19003900  |
| H  | 4.00657900  | -2.25935800 | -4.40606500 | F  | -4.55025100 | -1.92145600 | 2.80172000  |
| C  | 3.48281600  | -0.75704500 | -2.96373400 | F  | -5.68419100 | 4.16543600  | 1.64006200  |
| H  | 2.62627200  | -0.40983600 | -3.53304900 | F  | -7.06412700 | 2.49717600  | 1.88842200  |
| P  | 2.51337500  | 1.03650500  | -1.10593700 | F  | -6.50374200 | 3.16292700  | -0.10392000 |
| Fe | 3.73467100  | 1.60339900  | 2.07940700  | C  | 1.09534800  | 3.01139600  | 1.22656200  |
| C  | 2.71478200  | -0.14164400 | 2.51139200  | H  | 0.75992900  | 1.98447400  | 1.32369500  |
| C  | 4.12780100  | -0.39360100 | 2.44221300  | C  | 0.65116500  | 3.80547400  | 2.46067400  |
| H  | 4.59717700  | -1.09492200 | 1.77028400  | H  | 0.91920100  | 4.86330300  | 2.37384600  |
| C  | 4.78863400  | 0.40851300  | 3.41516800  | H  | 1.11322700  | 3.40871500  | 3.36897700  |
| C  | 3.79582300  | 1.16373100  | 4.10397500  | H  | -0.43593000 | 3.73621400  | 2.56232900  |
| C  | 2.52519800  | 0.82471500  | 3.55277700  | C  | -0.85847000 | 3.18479200  | -0.27939600 |
| H  | 1.57977400  | 1.23776400  | 3.86651000  | C  | -2.53727300 | 1.59300000  | 0.63556500  |
| C  | 2.32666100  | -2.63194000 | 1.40277900  | C  | -2.75751500 | 0.22173000  | 0.86280000  |
| C  | 2.71361800  | -3.32167000 | 2.56348000  | H  | -1.93254000 | -0.46819000 | 0.72764700  |
| H  | 2.42347300  | -2.94262300 | 3.53894000  | C  | -4.01843900 | -0.23358800 | 1.22488100  |
| C  | 3.48234600  | -4.47985700 | 2.47294300  | C  | -5.09989800 | 0.64019700  | 1.34824100  |
| H  | 3.77068400  | -5.00968000 | 3.37680400  | H  | -6.08875400 | 0.27487600  | 1.59542400  |
| C  | 3.89980000  | -4.94752300 | 1.22179600  | C  | -4.87057500 | 1.99679400  | 1.14088700  |
| H  | 4.51546100  | -5.84063800 | 1.15397200  | C  | -3.60522300 | 2.48418100  | 0.81660400  |
| C  | 3.53607000  | -4.25628600 | 0.06758000  | H  | -3.46143000 | 3.54349900  | 0.66415500  |
| H  | 3.87814600  | -4.59466600 | -0.90633800 | C  | -4.25215000 | -1.68491900 | 1.50546800  |
| C  | 2.74395300  | -3.10904100 | 0.15684000  | C  | -6.02599800 | 2.95443700  | 1.15187200  |
| H  | 2.45582200  | -2.55643100 | -0.73118100 | Cl | -0.16881500 | -0.18721700 | -2.82386200 |
| C  | 0.09775000  | -1.24020000 | 2.70017700  | H  | -4.08610300 | -4.76125300 | -2.02073700 |
| C  | -0.57609100 | -0.10576000 | 3.17864500  | Ir | 0.74910200  | -0.35428800 | -0.52656700 |
| H  | -0.30121600 | 0.87982800  | 2.81917600  | C  | 0.94243900  | 4.81500600  | -0.50613100 |
| C  | -1.63851000 | -0.22716000 | 4.07116000  | H  | 2.00915800  | 4.86144100  | -0.28419100 |
| H  | -2.15109100 | 0.66432600  | 4.42109000  | H  | 0.80016900  | 4.85366700  | -1.58389600 |
| C  | -2.06366400 | -1.49072800 | 4.48372500  | H  | 0.42794100  | 5.67431300  | -0.05984500 |
| H  | -2.90228700 | -1.58890000 | 5.16592500  | C  | -2.69891800 | -3.14891100 | -1.88096900 |



|                |             |             |             |    |             |             |             |
|----------------|-------------|-------------|-------------|----|-------------|-------------|-------------|
| C              | -3.74399900 | -0.99828700 | -2.16762800 | H  | -0.92070800 | 4.84229400  | -2.88873700 |
| C              | -5.02483200 | -1.57629100 | -2.16444400 | C  | 0.42813500  | 3.38562000  | -2.07011100 |
| C              | -4.06051500 | -3.75106000 | -1.60384700 | H  | -0.35999000 | 2.68355100  | -1.83824600 |
| H              | -2.56172200 | 0.80237500  | -2.19183800 | C  | 3.55596500  | 0.87979300  | -1.93821800 |
| C              | -3.56269600 | 0.38735200  | -2.18655000 | C  | 4.70317900  | 0.25572100  | -1.43385600 |
| C              | -6.13697900 | -0.73135900 | -2.15733400 | H  | 4.86236400  | 0.20402900  | -0.36548300 |
| H              | -4.17531000 | -3.83606200 | -0.51202500 | C  | 5.63516000  | -0.32563900 | -2.29494000 |
| C              | -5.95870800 | 0.65193700  | -2.14435000 | H  | 6.51932500  | -0.80415300 | -1.88284200 |
| C              | -4.67875300 | 1.21538200  | -2.16692100 | C  | 5.42042600  | -0.31449900 | -3.67225000 |
| H              | -7.13472300 | -1.16175300 | -2.14027100 | H  | 6.14336500  | -0.77062500 | -4.34296300 |
| H              | -6.82824300 | 1.29921500  | -2.09424400 | C  | 4.26364600  | 0.28122100  | -4.18397300 |
| H              | -4.54012000 | 2.28945300  | -2.13329700 | H  | 4.08152400  | 0.28715300  | -5.25521400 |
| N              | -5.10866100 | -2.96320200 | -2.23571400 | C  | 3.33993000  | 0.87503500  | -3.32660100 |
| N              | -2.63431400 | -1.86652500 | -2.12374300 | H  | 2.43940200  | 1.32700000  | -3.73037000 |
| C              | -1.50615300 | -3.97680800 | -1.79465700 | P  | 2.18863900  | 1.50731200  | -0.87572900 |
| C              | -0.28404700 | -3.58358600 | -2.37570200 | Fe | 3.63260400  | 1.32348200  | 2.30630500  |
| C              | -1.56542600 | -5.19254700 | -1.08283000 | C  | 2.94108600  | -0.61098700 | 2.25003000  |
| C              | 0.84025800  | -4.38874900 | -2.24688700 | C  | 4.37642800  | -0.59062000 | 2.16529200  |
| H              | -0.20671600 | -2.65343800 | -2.92464000 | H  | 4.96048100  | -0.99342600 | 1.35211100  |
| C              | -0.42854400 | -5.97907900 | -0.93868400 | C  | 4.89218500  | 0.03618600  | 3.33621100  |
| H              | -2.48874100 | -5.50826000 | -0.60948400 | C  | 3.78780300  | 0.40648400  | 4.15844600  |
| C              | 0.77583900  | -5.58088800 | -1.52391100 | C  | 2.59178100  | 0.00834000  | 3.49321800  |
| H              | 1.77423500  | -4.06703400 | -2.69651800 | H  | 1.58637900  | 0.15939000  | 3.85644000  |
| H              | -0.48052700 | -6.90155100 | -0.36880900 | C  | 2.90457100  | -2.53961600 | 0.24496100  |
| H              | 1.66398900  | -6.19297800 | -1.40476000 | C  | 3.68808800  | -3.42149500 | 1.00994200  |
| H              | -1.70867100 | -1.39813300 | -2.26442200 | H  | 3.59539600  | -3.43001100 | 2.09163500  |
| H              | -0.40202800 | -1.50760100 | -0.26002600 | C  | 4.61433400  | -4.26080400 | 0.39418400  |
| H              | -6.03739300 | -3.33184500 | -2.07395100 | H  | 5.21235200  | -4.93967800 | 0.99621000  |
| <b>A-TSSOR</b> |             |             |             | C  | 4.79351500  | -4.20679200 | -0.99233800 |
| C              | 4.52909000  | 3.18725000  | 2.06168100  | H  | 5.53224300  | -4.84544100 | -1.46947600 |
| C              | 3.23182300  | 3.31796700  | 2.63187900  | C  | 4.02980000  | -3.32584000 | -1.75477500 |
| H              | 3.00506200  | 3.73743600  | 3.60206300  | H  | 4.17036300  | -3.26378000 | -2.82895200 |
| C              | 2.28353000  | 2.73205900  | 1.73790300  | C  | 3.08040700  | -2.50717400 | -1.14183800 |
| C              | 3.00742200  | 2.24312500  | 0.58646600  | H  | 2.47508000  | -1.82146800 | -1.72672700 |
| C              | 4.39268500  | 2.54182900  | 0.80136600  | C  | 0.66573400  | -2.26634300 | 2.14821800  |
| H              | 5.20213700  | 2.29070100  | 0.13307700  | C  | -0.33729000 | -1.54132600 | 2.81193400  |
| C              | 1.75344600  | 3.07037400  | -1.75872900 | H  | -0.41014800 | -0.47228100 | 2.63612700  |
| C              | 2.76657600  | 3.99271100  | -2.06378100 | C  | -1.25463100 | -2.17598600 | 3.64552800  |
| H              | 3.80030100  | 3.75780900  | -1.82751400 | H  | -2.03341700 | -1.60061800 | 4.13542100  |
| C              | 2.45641400  | 5.20859200  | -2.66907500 | C  | -1.19615000 | -3.56238300 | 3.81641300  |
| H              | 3.24913000  | 5.91521000  | -2.89958400 | H  | -1.92051500 | -4.06356300 | 4.45185500  |
| C              | 1.12768400  | 5.51828900  | -2.97362500 | C  | -0.20481300 | -4.29451500 | 3.16446500  |
| H              | 0.88375000  | 6.46933100  | -3.43902400 | H  | -0.14832100 | -5.37219200 | 3.29529500  |
| C              | 0.11655600  | 4.60583000  | -2.67309400 | C  | 0.72520700  | -3.65018800 | 2.34104700  |

H 1.48552500 -4.23547900 1.83826200  
 P 1.76337600 -1.30155000 1.00809600  
 H 5.46126800 3.48661100 2.52255500  
 H 3.84178000 0.93619900 5.10048600  
 H 5.93611100 0.23028200 3.54457400  
 S -2.31320500 4.59481200 0.47166200  
 N 0.08805300 3.54467100 1.00132000  
 N -1.58014500 1.99534600 0.61657300  
 H -0.83226600 1.28498000 0.44353600  
 F -6.10991600 -1.48022700 2.57539500  
 F -4.11491900 -2.28642600 2.27379000  
 F -4.45096100 -0.80688800 3.81826900  
 F -5.88235600 2.45152000 -2.15483800  
 F -6.69215500 3.36103900 -0.35859900  
 F -7.39985500 1.40636200 -0.98796500  
 C 0.79668700 2.63411500 1.93897400  
 H 0.52590300 1.61253500 1.67041300  
 C 0.34593100 2.92023700 3.37632700  
 H 0.55104000 3.95694900 3.66084700  
 H 0.85652100 2.26348500 4.08617700  
 H -0.73290000 2.75738500 3.45937200  
 C -1.23186600 3.32201800 0.70006500  
 C -2.89853600 1.49566100 0.61848800  
 C -3.20089000 0.44404000 1.48688600  
 H -2.41571600 0.02596900 2.10323400  
 C -4.50702000 -0.04328300 1.57905800  
 C -5.52797900 0.52039600 0.81977300  
 H -6.54257600 0.15803100 0.90501500  
 C -5.21244200 1.54055700 -0.07555200  
 C -3.90896400 2.01543400 -0.20078200  
 H -3.67281500 2.78985700 -0.91415100  
 C -4.80580600 -1.14210900 2.55289900  
 C -6.29520700 2.18697600 -0.89248800  
 Cl -0.55443800 0.26592500 -2.64512800  
 H -1.76350800 -4.06013000 0.61248500  
 Ir 0.65242200 -0.19204500 -0.55158200  
 C 0.59356800 4.91401000 0.93677300  
 H 1.68291300 4.87617700 0.93509100  
 H 0.25437200 5.37657500 0.01228300  
 H 0.24228300 5.52463000 1.77700300  
 C -1.53660400 -2.88527000 -1.20409000  
 C -3.60308800 -1.79919500 -1.79441600  
 C -4.33082700 -2.64667500 -0.93355300  
 C -2.24243100 -3.23552400 0.09296600

H -3.64870700 -0.16517800 -3.18637700  
 C -4.24385800 -0.81876100 -2.55629100  
 C -5.72260700 -2.51489200 -0.87803600  
 H -2.20242100 -2.35571500 0.74634800  
 C -6.36048100 -1.55434500 -1.65842700  
 C -5.62701600 -0.70212900 -2.49243900  
 H -6.29267600 -3.15960200 -0.21475500  
 H -7.43872800 -1.44729300 -1.59624800  
 H -6.13005300 0.06557800 -3.06677200  
 N -3.60919100 -3.61723200 -0.25061200  
 N -2.25245600 -2.10701800 -2.00408100  
 C -0.36838600 -3.59827000 -1.72316500  
 C 0.07796400 -3.39439400 -3.04473500  
 C 0.26104000 -4.59015200 -0.95043600  
 C 1.09887900 -4.17322800 -3.57223900  
 H -0.37073000 -2.62835700 -3.66514900  
 C 1.27533600 -5.37533200 -1.48718700  
 H -0.03669600 -4.75030000 0.07629000  
 C 1.69278200 -5.17708700 -2.80162700  
 H 1.42744100 -4.00151900 -4.59275900  
 H 1.75213100 -6.13054500 -0.87054700  
 H 2.48578400 -5.78903500 -3.21994600  
 H -1.74059900 -1.50826000 -2.67259300  
 H -0.46537000 -1.40109500 -0.29342900  
 H -4.11032200 -4.04553200 0.51737700

**A-TS50S**

C 3.14218500 4.15212000 2.35509200  
 C 1.72146400 4.19123400 2.43323400  
 H 1.14469800 4.74745100 3.15879700  
 C 1.18521100 3.30537000 1.44703600  
 C 2.30161300 2.71997600 0.73729200  
 C 3.50025200 3.26257800 1.30533800  
 H 4.50527600 3.00509100 1.00610500  
 C 1.86660800 2.87102200 -2.00352300  
 C 2.78122500 3.93100100 -2.11531700  
 H 3.64009500 3.97662600 -1.45271800  
 C 2.60140900 4.92262100 -3.07664000  
 H 3.31771600 5.73603000 -3.15357800  
 C 1.50240300 4.86832600 -3.93926700  
 H 1.35999700 5.64185300 -4.68884400  
 C 0.58603400 3.82372400 -3.82689300  
 H -0.28554500 3.78228700 -4.47228300  
 C 0.76600900 2.83036300 -2.86203100  
 H 0.04418500 2.03216600 -2.77633900

|    |             |             |             |    |             |             |             |
|----|-------------|-------------|-------------|----|-------------|-------------|-------------|
| C  | 3.86429300  | 1.06600600  | -1.07323900 | H  | 1.70885200  | 2.42269700  | 5.46474900  |
| C  | 4.73731600  | 0.61710200  | -0.07436200 | H  | 4.22418600  | 1.68527400  | 4.79472700  |
| H  | 4.44140600  | 0.68366200  | 0.96257700  | S  | -2.65318600 | 3.45759600  | -1.97311600 |
| C  | 5.97943000  | 0.07431600  | -0.40190200 | N  | -0.75048300 | 3.41346900  | -0.09731800 |
| H  | 6.64091900  | -0.26767400 | 0.38935600  | N  | -2.03084500 | 1.49054900  | -0.21005200 |
| C  | 6.35940800  | -0.04577200 | -1.73885700 | H  | -1.18878800 | 0.86162300  | -0.15974700 |
| H  | 7.32417200  | -0.47350800 | -1.99728200 | F  | -5.53735500 | -3.14636100 | 0.66363700  |
| C  | 5.48877800  | 0.38378500  | -2.74300500 | F  | -3.43952900 | -3.08635300 | 1.23207100  |
| H  | 5.77165500  | 0.28747600  | -3.78758600 | F  | -4.97841400 | -2.45151600 | 2.63484600  |
| C  | 4.25134200  | 0.93666800  | -2.41616500 | F  | -6.83904000 | 3.08621600  | 0.21149000  |
| H  | 3.57609800  | 1.25094800  | -3.20318800 | F  | -7.96262100 | 1.33345400  | 0.85413900  |
| P  | 2.14228400  | 1.59884900  | -0.69314900 | F  | -7.40226600 | 1.56248900  | -1.23341700 |
| Fe | 2.36876400  | 2.25038100  | 2.71956500  | C  | -0.27182100 | 2.97655300  | 1.24069700  |
| C  | 1.83871700  | 0.27134600  | 2.87405000  | H  | -0.34391800 | 1.89283800  | 1.25313300  |
| C  | 3.22282600  | 0.44424300  | 3.22654700  | C  | -1.19027600 | 3.55631300  | 2.32294700  |
| H  | 4.05576800  | -0.04251800 | 2.74442300  | H  | -1.19262300 | 4.65070800  | 2.30023800  |
| C  | 3.31019700  | 1.33699700  | 4.33209800  | H  | -0.87162700 | 3.23575000  | 3.31884100  |
| C  | 1.98587600  | 1.72341000  | 4.68681100  | H  | -2.21399800 | 3.20928000  | 2.15492600  |
| C  | 1.08490900  | 1.07094000  | 3.79622400  | C  | -1.78710100 | 2.77307500  | -0.70427700 |
| H  | 0.01251500  | 1.17921300  | 3.81060200  | C  | -3.27362400 | 0.92225000  | 0.04795500  |
| C  | 2.58644600  | -2.04828200 | 1.53548900  | C  | -3.31762700 | -0.41842500 | 0.47878900  |
| C  | 3.05156300  | -2.63459400 | 2.72708800  | H  | -2.39767100 | -0.98419000 | 0.52983200  |
| H  | 2.54292700  | -2.43011800 | 3.66402300  | C  | -4.53093000 | -1.00584800 | 0.82031700  |
| C  | 4.17569500  | -3.45598000 | 2.71988400  | C  | -5.73284100 | -0.30402000 | 0.72067700  |
| H  | 4.52214700  | -3.90512400 | 3.64662200  | H  | -6.67600600 | -0.77675700 | 0.96497900  |
| C  | 4.86809400  | -3.68590600 | 1.52505100  | C  | -5.68518400 | 1.01531900  | 0.28465800  |
| H  | 5.75505200  | -4.31381300 | 1.52421200  | C  | -4.48010300 | 1.63794000  | -0.02985400 |
| C  | 4.42033200  | -3.10296500 | 0.34225700  | H  | -4.48173800 | 2.66448200  | -0.36302500 |
| H  | 4.94972900  | -3.26771500 | -0.59014900 | C  | -4.60931200 | -2.41487500 | 1.33003900  |
| C  | 3.27917900  | -2.29627200 | 0.34456400  | C  | -6.96923800 | 1.75450700  | 0.03831500  |
| H  | 2.92510000  | -1.83522100 | -0.57317300 | Cl | 1.02640500  | -0.36144800 | -3.03749300 |
| C  | -0.14330100 | -1.66725800 | 2.49372400  | H  | -1.52934100 | -3.58117600 | 0.19781800  |
| C  | -1.25771200 | -0.89977400 | 2.86891300  | Ir | 0.78449500  | -0.25654200 | -0.58480700 |
| H  | -1.34565700 | 0.12462500  | 2.52176300  | C  | -0.42780600 | 4.78403400  | -0.49033000 |
| C  | -2.26973700 | -1.44031600 | 3.65556500  | H  | 0.52524300  | 5.05725100  | -0.03817800 |
| H  | -3.12605300 | -0.83061400 | 3.92560200  | H  | -0.34400000 | 4.84824400  | -1.57229500 |
| C  | -2.20861600 | -2.77783400 | 4.05225100  | H  | -1.21219400 | 5.47729600  | -0.16413200 |
| H  | -3.01118200 | -3.20636800 | 4.64402300  | C  | -1.08460600 | -2.89637200 | -1.78713100 |
| C  | -1.13393700 | -3.56537500 | 3.64670700  | C  | 0.98451200  | -3.80108200 | -2.62504800 |
| H  | -1.08677100 | -4.61338100 | 3.92916700  | C  | 1.25693900  | -4.42498800 | -1.39822400 |
| C  | -0.10453500 | -3.01347600 | 2.87926400  | C  | -1.00732500 | -3.93743500 | -0.68605600 |
| H  | 0.73568200  | -3.63943600 | 2.60188700  | H  | 1.65508500  | -3.36589300 | -4.61930900 |
| P  | 1.18977900  | -0.82619400 | 1.52256300  | C  | 1.88231100  | -3.87983000 | -3.69031200 |
| H  | 3.82989400  | 4.67537500  | 3.00625400  | C  | 2.45368300  | -5.12986500 | -1.25769900 |

|             |             |             |             |    |             |             |             |
|-------------|-------------|-------------|-------------|----|-------------|-------------|-------------|
| H           | -1.54069800 | -4.82981700 | -1.05022700 | C  | 4.83917000  | -1.60675100 | -2.86480300 |
| C           | 3.35831700  | -5.20463000 | -2.31508200 | H  | 5.58343700  | -2.33841900 | -2.56389900 |
| C           | 3.07330300  | -4.58278200 | -3.53452600 | C  | 4.44890500  | -1.50907700 | -4.20026300 |
| H           | 2.66428200  | -5.60475800 | -0.30530900 | H  | 4.89494400  | -2.15858800 | -4.94791300 |
| H           | 4.28633700  | -5.75419600 | -2.18842900 | C  | 3.47449300  | -0.57842000 | -4.57125400 |
| H           | 3.77614800  | -4.64124200 | -4.35926600 | H  | 3.15756600  | -0.50386900 | -5.60742900 |
| N           | 0.34664500  | -4.31837400 | -0.32143600 | C  | 2.89759100  | 0.25461000  | -3.61509400 |
| N           | -0.20215000 | -3.05106600 | -2.76474200 | H  | 2.12384600  | 0.95814800  | -3.90451900 |
| C           | -2.34721700 | -2.18617600 | -2.09082900 | P  | 2.32915200  | 1.12333500  | -1.03940900 |
| C           | -2.36004700 | -0.89842200 | -2.64903000 | Fe | 4.17882800  | 0.60476600  | 1.87474200  |
| C           | -3.56505700 | -2.84278400 | -1.85158700 | C  | 3.06568200  | -1.10327400 | 1.95286000  |
| C           | -3.56883400 | -0.26696100 | -2.92673500 | C  | 4.44238500  | -1.42437900 | 1.68758300  |
| H           | -1.42652100 | -0.37227700 | -2.80059500 | H  | 4.80891900  | -1.95436400 | 0.82199800  |
| C           | -4.77055200 | -2.21701400 | -2.16404200 | C  | 5.23308000  | -0.94522100 | 2.77129100  |
| H           | -3.58098100 | -3.83421700 | -1.41358100 | C  | 4.35979800  | -0.33364500 | 3.71819400  |
| C           | -4.77723500 | -0.92329400 | -2.68532900 | C  | 3.02941600  | -0.43643600 | 3.22040800  |
| H           | -3.55882700 | 0.75863400  | -3.28176500 | H  | 2.13711000  | -0.06344700 | 3.70134100  |
| H           | -5.70436200 | -2.72834200 | -1.95737400 | C  | 2.17697400  | -2.99510600 | 0.06746500  |
| H           | -5.71858900 | -0.41218600 | -2.86355800 | C  | 2.89907700  | -4.00139100 | 0.72975600  |
| H           | -0.18504000 | -2.33504700 | -3.49165900 | H  | 3.12910300  | -3.90250000 | 1.78582600  |
| H           | -0.27395600 | -1.59801900 | -0.69078200 | C  | 3.35235700  | -5.11912700 | 0.03080300  |
| H           | 0.71910000  | -3.71686200 | 0.40763800  | H  | 3.90815100  | -5.89277000 | 0.55328300  |
| <b>A-10</b> |             |             |             | C  | 3.10297900  | -5.23634800 | -1.33886000 |
| C           | 5.43660300  | 2.19674900  | 1.38885300  | H  | 3.46015600  | -6.10640600 | -1.88268800 |
| C           | 4.33633100  | 2.64177700  | 2.17389300  | C  | 2.39700200  | -4.23616000 | -2.00559500 |
| H           | 4.40284500  | 3.10827300  | 3.14662800  | H  | 2.19621700  | -4.31946800 | -3.06805200 |
| C           | 3.12204500  | 2.29981000  | 1.50200500  | C  | 1.93360800  | -3.12345200 | -1.30667000 |
| C           | 3.48647600  | 1.63353400  | 0.26982500  | H  | 1.39586100  | -2.33421600 | -1.82357800 |
| C           | 4.92050000  | 1.58991800  | 0.21209400  | C  | 0.43829200  | -1.98635700 | 2.25369600  |
| H           | 5.50356500  | 1.14188400  | -0.57831300 | C  | -0.36918500 | -0.98970400 | 2.82392300  |
| C           | 2.10204500  | 2.75217900  | -1.86491700 | H  | -0.33374000 | 0.01833000  | 2.42391600  |
| C           | 3.24410800  | 3.37589200  | -2.39429500 | C  | -1.24281700 | -1.29398800 | 3.86777400  |
| H           | 4.20259100  | 2.86624600  | -2.37242100 | H  | -1.87791700 | -0.52100600 | 4.28905300  |
| C           | 3.15384600  | 4.64739900  | -2.95569500 | C  | -1.32906300 | -2.60161600 | 4.34693900  |
| H           | 4.04201800  | 5.11857400  | -3.36703500 | H  | -2.02158000 | -2.84327700 | 5.14772500  |
| C           | 1.92497200  | 5.31266700  | -2.98686200 | C  | -0.52943400 | -3.59946400 | 3.78540200  |
| H           | 1.85565700  | 6.30636100  | -3.42010600 | H  | -0.59734000 | -4.62085800 | 4.14898900  |
| C           | 0.79003900  | 4.69948900  | -2.45710900 | C  | 0.35370700  | -3.29382900 | 2.74882500  |
| H           | -0.16711900 | 5.21087100  | -2.45873700 | H  | 0.95568700  | -4.08079100 | 2.31108500  |
| C           | 0.87815400  | 3.42301800  | -1.90004200 | P  | 1.59707500  | -1.46769200 | 0.91228800  |
| H           | -0.00488200 | 2.95339200  | -1.49653600 | H  | 6.48193100  | 2.26807000  | 1.65837400  |
| C           | 3.29379700  | 0.16655300  | -2.27078900 | H  | 4.65610600  | 0.15810400  | 4.63523000  |
| C           | 4.25866100  | -0.77924500 | -1.90420700 | H  | 6.31086300  | -1.00592900 | 2.84365800  |
| H           | 4.54487600  | -0.88110300 | -0.86712400 | S  | -1.22923800 | 4.98635600  | 0.90003400  |

|    |             |             |             |             |             |             |             |
|----|-------------|-------------|-------------|-------------|-------------|-------------|-------------|
| N  | 1.04238400  | 3.59283000  | 1.20189400  | H           | -6.60906000 | -2.51941700 | 0.85072700  |
| N  | -0.88513900 | 2.32270700  | 1.07979300  | H           | -8.05513500 | -1.29133400 | -0.75593300 |
| H  | -0.29954500 | 1.55192200  | 0.67871000  | H           | -7.01731700 | -0.16307100 | -2.73003200 |
| F  | -6.32200200 | 0.03452700  | 2.41369200  | N           | -3.94660900 | -2.83826200 | 0.64506400  |
| F  | -4.43438000 | -0.92095100 | 2.93848900  | N           | -2.84228600 | -1.62885500 | -1.57972800 |
| F  | -5.00047100 | 0.93767700  | 3.89130200  | C           | -1.43394300 | -3.59891700 | -1.11099400 |
| F  | -4.31849400 | 2.18321800  | -2.86274300 | C           | -1.39001200 | -3.86720900 | -2.48407400 |
| F  | -4.84109000 | 4.01504900  | -1.83270200 | C           | -0.95830800 | -4.57343700 | -0.22643100 |
| F  | -6.22840600 | 2.34014700  | -1.81990100 | C           | -0.88238800 | -5.07527300 | -2.96074900 |
| C  | 1.72290600  | 2.54979400  | 2.00659800  | H           | -1.78245200 | -3.12805700 | -3.17318900 |
| H  | 1.17339400  | 1.62345700  | 1.86257200  | C           | -0.45606700 | -5.78498300 | -0.69933500 |
| C  | 1.66529700  | 2.92574000  | 3.49308900  | H           | -0.98475300 | -4.39940400 | 0.84114600  |
| H  | 2.15705600  | 3.88458000  | 3.68268100  | C           | -0.41406600 | -6.04140100 | -2.06924300 |
| H  | 2.14845300  | 2.16533900  | 4.11267100  | H           | -0.86326800 | -5.26490800 | -4.03072200 |
| H  | 0.61921100  | 3.01725700  | 3.79959300  | H           | -0.09402900 | -6.52769700 | 0.00623100  |
| C  | -0.32477600 | 3.58090000  | 1.06688100  | H           | -0.02208400 | -6.98522600 | -2.43811100 |
| C  | -2.27790100 | 2.09597700  | 0.87466700  | H           | -2.41846500 | -0.91158300 | -2.16042600 |
| C  | -2.98680200 | 1.39867900  | 1.84586900  | H           | -1.05180300 | -1.57420700 | -0.51883500 |
| H  | -2.48921200 | 1.12688100  | 2.76870900  | H           | -4.37016300 | -2.98598600 | 1.55386700  |
| C  | -4.32650100 | 1.05751800  | 1.63249700  | <b>A-11</b> |             |             |             |
| C  | -4.97467700 | 1.43761000  | 0.46101400  | C           | -3.61541600 | -2.09143400 | 3.00316600  |
| H  | -6.00392500 | 1.15664200  | 0.28276700  | C           | -2.24241600 | -2.43216900 | 3.16302400  |
| C  | -4.26361300 | 2.16706500  | -0.49426200 | H           | -1.79651200 | -2.84716100 | 4.05582300  |
| C  | -2.92150400 | 2.48313900  | -0.30255000 | C           | -1.53349100 | -2.05638300 | 1.98004800  |
| H  | -2.37529200 | 3.03161200  | -1.05678700 | C           | -2.49788000 | -1.48335700 | 1.06730500  |
| C  | -5.03453200 | 0.28464400  | 2.70499500  | C           | -3.77934400 | -1.51996100 | 1.71189300  |
| C  | -4.92211400 | 2.66675000  | -1.75071800 | H           | -4.70001200 | -1.14219900 | 1.29238800  |
| Cl | -0.79473400 | 0.67485000  | -2.36150500 | C           | -2.01216800 | -2.59862300 | -1.46204700 |
| H  | -2.04026700 | -2.82409000 | 1.47683500  | C           | -3.00712300 | -3.55920700 | -1.21647600 |
| Ir | 0.56643700  | -0.11371000 | -0.57645900 | H           | -3.85136200 | -3.31724800 | -0.57775200 |
| C  | 1.74115300  | 4.87068700  | 1.09137400  | C           | -2.91854400 | -4.82424000 | -1.79319500 |
| H  | 2.81283600  | 4.66871300  | 1.05400200  | H           | -3.69483600 | -5.55952200 | -1.60124900 |
| H  | 1.44156600  | 5.36595700  | 0.16893300  | C           | -1.82954000 | -5.14654800 | -2.60786200 |
| H  | 1.51479100  | 5.53942600  | 1.92941300  | H           | -1.75477700 | -6.13651200 | -3.04853900 |
| C  | -1.95977000 | -2.24939200 | -0.62605300 | C           | -0.83505000 | -4.19781300 | -2.84628500 |
| C  | -4.20986000 | -1.50529900 | -1.34624700 | H           | 0.02363800  | -4.44367400 | -3.46258400 |
| C  | -4.79643700 | -2.13542200 | -0.22599300 | C           | -0.92723600 | -2.92459700 | -2.28111900 |
| C  | -2.61991000 | -2.25222100 | 0.75729600  | H           | -0.15273900 | -2.19385200 | -2.47470200 |
| H  | -4.57201700 | -0.30737400 | -3.08807900 | C           | -3.76830600 | -0.31308900 | -1.26081700 |
| C  | -5.02848800 | -0.80251600 | -2.23727600 | C           | -4.42005100 | 0.72593900  | -0.58080700 |
| C  | -6.17504700 | -2.04665600 | -0.02727700 | H           | -4.02142900 | 1.08269100  | 0.35904500  |
| H  | -2.65147600 | -1.21140500 | 1.10433600  | C           | -5.56846800 | 1.30954300  | -1.11021100 |
| C  | -6.98426700 | -1.34947600 | -0.92618300 | H           | -6.06154800 | 2.11294100  | -0.57031400 |
| C  | -6.40514300 | -0.72394300 | -2.03141700 | C           | -6.07187200 | 0.87246300  | -2.33791200 |

|    |             |             |             |              |             |             |             |
|----|-------------|-------------|-------------|--------------|-------------|-------------|-------------|
| H  | -6.96348500 | 1.33085400  | -2.75576800 | F            | 7.63008700  | -0.50696100 | 0.77433800  |
| C  | -5.41994600 | -0.14991400 | -3.02876700 | F            | 6.22537600  | -0.28660100 | 2.42014300  |
| H  | -5.79996900 | -0.48815000 | -3.98834300 | F            | 6.53376400  | -2.23878900 | 1.51524800  |
| C  | -4.27376600 | -0.74125600 | -2.49611800 | F            | 3.12873000  | 2.60356700  | -2.39756300 |
| H  | -3.76785800 | -1.52769100 | -3.04491700 | F            | 4.86956600  | 1.78456600  | -3.40844700 |
| P  | -2.16465400 | -0.95925300 | -0.64501900 | F            | 5.12964800  | 3.03322700  | -1.64927400 |
| Fe | -2.40821100 | -0.40406700 | 2.79224900  | C            | -0.04388200 | -2.15299100 | 1.76423400  |
| C  | -1.48299400 | 1.36374600  | 2.32562400  | H            | 0.28397000  | -1.17553100 | 1.42091900  |
| C  | -2.85345700 | 1.60480700  | 2.69399300  | C            | 0.73092200  | -2.50689500 | 3.04131800  |
| H  | -3.59794600 | 2.07549700  | 2.06998300  | H            | 0.48329400  | -3.51198500 | 3.39542300  |
| C  | -3.05291500 | 1.14324900  | 4.02524000  | H            | 0.51265600  | -1.79828500 | 3.84526700  |
| C  | -1.81470600 | 0.62158000  | 4.49929100  | H            | 1.80461000  | -2.47975000 | 2.83296000  |
| C  | -0.84956100 | 0.75984700  | 3.46033600  | C            | 1.50191100  | -2.93343000 | 0.02092900  |
| H  | 0.18057000  | 0.44689600  | 3.51834700  | C            | 3.03465200  | -1.01262700 | -0.41204400 |
| C  | -1.70697900 | 3.27993400  | 0.30208100  | C            | 4.14866000  | -1.38280800 | 0.35077700  |
| C  | -1.79099100 | 4.32188600  | 1.23910800  | H            | 4.09377300  | -2.23871700 | 1.01096100  |
| H  | -1.29302000 | 4.22683600  | 2.19977800  | C            | 5.31566600  | -0.62620200 | 0.27548700  |
| C  | -2.51034800 | 5.47657200  | 0.94009300  | C            | 5.40218800  | 0.49881200  | -0.54525700 |
| H  | -2.56922600 | 6.28060300  | 1.66816000  | H            | 6.30455900  | 1.09669300  | -0.56847500 |
| C  | -3.15674800 | 5.59880400  | -0.29454300 | C            | 4.29083500  | 0.85090300  | -1.30862000 |
| H  | -3.71952300 | 6.49921100  | -0.52426800 | C            | 3.12366000  | 0.09608300  | -1.26322600 |
| C  | -3.07708000 | 4.56682300  | -1.22919800 | H            | 2.26967400  | 0.37341200  | -1.86719200 |
| H  | -3.57697600 | 4.65643300  | -2.18913400 | C            | 6.43215400  | -0.92512400 | 1.23277300  |
| C  | -2.35169300 | 3.41021000  | -0.93420000 | C            | 4.35105000  | 2.06454300  | -2.19373400 |
| H  | -2.28370500 | 2.59778800  | -1.65259600 | Cl           | 0.12550300  | 0.24610400  | -3.35842800 |
| C  | 0.94397200  | 2.30455800  | 1.00339200  | Ir           | -0.60247500 | 0.47294600  | -1.15393200 |
| C  | 1.86935300  | 1.43610000  | 1.60986200  | C            | -0.22754400 | -4.45630900 | 0.81872000  |
| H  | 1.56332300  | 0.44601800  | 1.92662300  | H            | -1.25474000 | -4.38184100 | 1.17992100  |
| C  | 3.20058500  | 1.81025400  | 1.76318600  | H            | -0.22756400 | -4.93913700 | -0.15722900 |
| H  | 3.90896100  | 1.12515800  | 2.21718500  | H            | 0.36818200  | -5.06973000 | 1.50485400  |
| C  | 3.63837400  | 3.04200400  | 1.27060700  | <b>A-11a</b> |             |             |             |
| H  | 4.68451900  | 3.31833400  | 1.35525300  | H            | -0.87546600 | 2.37969900  | -1.25319500 |
| C  | 2.73863200  | 3.89668300  | 0.63605300  | C            | -0.63073900 | 1.34030300  | 0.62778500  |
| H  | 3.08140200  | 4.84166800  | 0.22596700  | C            | 1.56595900  | 0.19293000  | 0.72253800  |
| C  | 1.39616600  | 3.53643800  | 0.50826100  | C            | 1.73081200  | 0.37823200  | -0.67058900 |
| H  | 0.70420100  | 4.20825100  | 0.01253300  | C            | -0.05353400 | 2.02661100  | -0.62465500 |
| P  | -0.77428200 | 1.73918200  | 0.67483000  | H            | 2.37636900  | -0.70703300 | 2.49195700  |
| H  | -4.39117400 | -2.20852600 | 3.74811800  | C            | 2.50726200  | -0.56980800 | 1.42068500  |
| H  | -1.64086100 | 0.16419700  | 5.46420600  | C            | 2.83434400  | -0.19007400 | -1.31121500 |
| H  | -3.98937000 | 1.15724300  | 4.56661300  | H            | 0.53647000  | 2.89826500  | -0.29672800 |
| S  | 2.47886200  | -4.20079300 | -0.46852500 | C            | 3.76685300  | -0.94855500 | -0.60260100 |
| N  | 0.30597800  | -3.10602500 | 0.68246300  | C            | 3.60085400  | -1.13952700 | 0.76832900  |
| N  | 1.78415000  | -1.61020900 | -0.23329700 | H            | 2.94770600  | -0.04422300 | -2.38361300 |
| H  | 0.97309800  | -0.99059800 | -0.45083400 | H            | 4.61492900  | -1.38343500 | -1.12280500 |

|              |             |             |             |    |             |             |             |
|--------------|-------------|-------------|-------------|----|-------------|-------------|-------------|
| H            | 4.31699000  | -1.72782000 | 1.33423300  | H  | 0.38731900  | -0.06644700 | 5.78066900  |
| N            | 0.73407700  | 1.06550500  | -1.37571200 | C  | 0.08609700  | -0.61499300 | 3.72747900  |
| N            | 0.49384500  | 0.80494600  | 1.38771500  | H  | -0.65007300 | 0.16347400  | 3.57312100  |
| C            | -1.71882900 | 0.33325400  | 0.29088700  | P  | -0.27934600 | -1.17745100 | 0.99754500  |
| C            | -1.41760500 | -0.96097800 | -0.15236500 | Fe | 1.19770000  | -3.87859900 | -0.56369100 |
| C            | -3.06140700 | 0.70989100  | 0.40757300  | C  | 2.87782900  | -2.67121900 | -0.55988800 |
| C            | -2.44112900 | -1.85080500 | -0.47628800 | C  | 3.11308200  | -3.82988100 | 0.25953800  |
| H            | -0.38356600 | -1.27422900 | -0.24048400 | H  | 3.37453400  | -3.81717200 | 1.30573200  |
| C            | -4.08678200 | -0.17728600 | 0.07997800  | C  | 2.96097800  | -4.99640500 | -0.54182400 |
| H            | -3.30580900 | 1.70976400  | 0.76122500  | C  | 2.63832300  | -4.58324000 | -1.86629400 |
| C            | -3.77767200 | -1.46302100 | -0.36416300 | C  | 2.57521200  | -3.15958900 | -1.87734700 |
| H            | -2.19281200 | -2.85168600 | -0.81886800 | H  | 2.29802300  | -2.55130500 | -2.72519300 |
| H            | -5.12354800 | 0.13269600  | 0.17924700  | C  | 3.74589600  | -0.85825600 | 1.54574700  |
| H            | -4.57210900 | -2.15992500 | -0.61637500 | C  | 4.85729000  | -1.66068400 | 1.84240900  |
| H            | 0.21999400  | 0.33365800  | 2.24111400  | H  | 5.23550300  | -2.36077500 | 1.10430800  |
| H            | -1.08622200 | 2.13125500  | 1.23778300  | C  | 5.49219700  | -1.54754200 | 3.07761900  |
| H            | 1.02129500  | 1.38285700  | -2.29291400 | H  | 6.34738600  | -2.17807300 | 3.30489700  |
| <b>B-TS4</b> |             |             |             | C  | 5.03989600  | -0.61350200 | 4.01390700  |
| C            | -0.47183200 | -5.07899600 | -0.15034000 | H  | 5.53759900  | -0.52533500 | 4.97572100  |
| C            | -0.59941800 | -4.45174800 | -1.41714200 | C  | 3.96220100  | 0.21552800  | 3.70552000  |
| H            | -0.69434300 | -4.96502900 | -2.36148100 | H  | 3.61740600  | 0.95819600  | 4.41586800  |
| C            | -0.53728900 | -3.03567300 | -1.25541700 | C  | 3.31706200  | 0.09619700  | 2.47567700  |
| C            | -0.36795100 | -2.78727900 | 0.16570900  | H  | 2.48162300  | 0.74172000  | 2.22406100  |
| C            | -0.34782900 | -4.06197200 | 0.82791000  | C  | 4.31688400  | -0.22718200 | -1.13408000 |
| H            | -0.24243800 | -4.21162500 | 1.89139900  | C  | 5.00723800  | 0.88634500  | -0.63255500 |
| C            | -2.03006000 | -0.82866500 | 1.44042300  | H  | 4.74512800  | 1.30162700  | 0.33333100  |
| C            | -2.98489000 | -1.85546900 | 1.42899000  | C  | 6.02948000  | 1.47695500  | -1.37171700 |
| H            | -2.73285200 | -2.83212600 | 1.03634200  | H  | 6.54388600  | 2.34479600  | -0.97102200 |
| C            | -4.27719500 | -1.61871100 | 1.89754500  | C  | 6.37634800  | 0.97100300  | -2.62537500 |
| H            | -5.02033400 | -2.40818300 | 1.84772600  | H  | 7.17200100  | 1.43427300  | -3.20175100 |
| C            | -4.62667000 | -0.36572700 | 2.39913600  | C  | 5.69266500  | -0.13395800 | -3.13274200 |
| H            | -5.63991500 | -0.18619200 | 2.74327100  | H  | 5.95794400  | -0.54289900 | -4.10381700 |
| C            | -3.68704300 | 0.66536600  | 2.40140700  | C  | 4.67078700  | -0.73053200 | -2.39171200 |
| H            | -3.96765700 | 1.65724200  | 2.73946400  | H  | 4.16930200  | -1.59738600 | -2.79937600 |
| C            | -2.39877300 | 0.43993500  | 1.91629000  | P  | 2.93319400  | -0.89546300 | -0.09981700 |
| H            | -1.68707700 | 1.25517500  | 1.88497800  | H  | -0.44440500 | -6.14476800 | 0.03328200  |
| C            | 0.43158200  | -1.48215200 | 2.67971300  | H  | 2.42082300  | -5.23210400 | -2.70408500 |
| C            | 1.38222900  | -2.47873500 | 2.93041800  | H  | 3.04338900  | -6.01727300 | -0.19334500 |
| H            | 1.67618900  | -3.14588500 | 2.13688800  | S  | -3.55078600 | -2.60351800 | -1.98125500 |
| C            | 1.95850000  | -2.62169100 | 4.19159800  | N  | -1.45715600 | -0.95874900 | -2.36077900 |
| H            | 2.69819700  | -3.39985700 | 4.35557300  | N  | -3.25997800 | 0.05394400  | -1.45428800 |
| C            | 1.60829800  | -1.75555900 | 5.22498800  | H  | -2.52846300 | 0.72934500  | -1.22218700 |
| H            | 2.06370100  | -1.85859400 | 6.20551100  | F  | -5.39600200 | 3.61181900  | 1.96917000  |
| C            | 0.67153000  | -0.74969700 | 4.98535800  | F  | -4.95885300 | 4.45459900  | 0.01417700  |

|    |             |             |             |            |             |             |             |
|----|-------------|-------------|-------------|------------|-------------|-------------|-------------|
| F  | -7.02556700 | 4.14987800  | 0.63812000  | N          | 3.40209800  | 3.73928700  | -0.58641900 |
| F  | -7.64513600 | -1.54840800 | 1.24346800  | C          | 2.09147500  | 3.55551900  | -2.57174100 |
| F  | -8.02348100 | -1.82213000 | -0.87941400 | C          | 3.10815000  | 2.80580300  | -3.19633000 |
| F  | -9.07977300 | -0.26908800 | 0.22545900  | C          | 0.87422600  | 3.72412400  | -3.25102800 |
| C  | -0.48063600 | -2.05787700 | -2.41708400 | C          | 2.90573800  | 2.23308700  | -4.44582000 |
| H  | 0.46602800  | -1.51570100 | -2.30817000 | H          | 4.04325700  | 2.66535800  | -2.67002300 |
| C  | -0.48527500 | -2.77780600 | -3.77492000 | C          | 0.67434000  | 3.15136200  | -4.50744100 |
| H  | -1.43103000 | -3.30369300 | -3.92313100 | H          | 0.06242200  | 4.27860900  | -2.79666600 |
| H  | 0.33994600  | -3.49364600 | -3.83636000 | C          | 1.68416200  | 2.39935000  | -5.10790200 |
| H  | -0.35785800 | -2.05868900 | -4.58782400 | H          | 3.70170900  | 1.64890000  | -4.89856700 |
| C  | -2.75617000 | -1.12634800 | -1.93726400 | H          | -0.27776300 | 3.28849500  | -5.01239100 |
| C  | -4.50845500 | 0.43076000  | -0.95642900 | H          | 1.52328700  | 1.94895300  | -6.08355800 |
| C  | -4.59660400 | 1.75935200  | -0.50460700 | H          | 1.54368300  | 5.88233100  | -0.38065700 |
| H  | -3.73514600 | 2.41212400  | -0.59475500 | H          | 0.25999800  | 4.77975400  | -0.89886200 |
| C  | -5.76109100 | 2.22694000  | 0.08933600  | <b>B-6</b> |             |             |             |
| C  | -6.86690600 | 1.39127900  | 0.25042200  | C          | -0.41378200 | -4.91526600 | -1.40325700 |
| H  | -7.77036000 | 1.75126900  | 0.72628800  | C          | -0.30071400 | -3.90795400 | -2.39654800 |
| C  | -6.77719500 | 0.08278700  | -0.21646300 | H          | -0.21664700 | -4.08438000 | -3.45796400 |
| C  | -5.62328400 | -0.40561400 | -0.82767600 | C          | -0.27295700 | -2.62813200 | -1.76951000 |
| H  | -5.56506800 | -1.43280700 | -1.15398700 | C          | -0.36784500 | -2.85557200 | -0.33338600 |
| C  | -5.78745300 | 3.61284400  | 0.66674900  | C          | -0.47719100 | -4.27561000 | -0.14049000 |
| C  | -7.88698300 | -0.88517800 | 0.07927100  | H          | -0.59293800 | -4.77461500 | 0.80912500  |
| Cl | -0.76622700 | 1.99238500  | -0.45426900 | C          | -2.18501900 | -1.47992800 | 1.38713800  |
| H  | 2.07203600  | 1.61526600  | -0.53745100 | C          | -3.11710800 | -2.39530500 | 0.87770300  |
| H  | 1.77667700  | 1.17326600  | -1.46747000 | H          | -2.80756100 | -3.15107500 | 0.16706100  |
| Ir | 1.06359200  | 0.35965300  | -0.22817000 | C          | -4.45800900 | -2.32173200 | 1.25629000  |
| C  | -1.07272900 | 0.18434700  | -3.20201500 | H          | -5.17590500 | -3.01638100 | 0.83143900  |
| H  | -0.07589600 | 0.52882900  | -2.92477800 | C          | -4.88534300 | -1.34010300 | 2.14934300  |
| H  | -1.08141700 | -0.10571200 | -4.26078800 | H          | -5.93448500 | -1.27461400 | 2.41864200  |
| H  | -1.76150800 | 1.01378800  | -3.07433300 | C          | -3.96809000 | -0.41526300 | 2.64917000  |
| H  | 0.40978000  | 3.57030400  | 0.99492500  | H          | -4.30150600 | 0.38548200  | 3.30119800  |
| C  | 2.30266000  | 4.05077500  | -1.19583900 | C          | -2.62840900 | -0.48007100 | 2.26754600  |
| C  | 3.49362300  | 3.92815700  | 0.79280300  | H          | -1.93783200 | 0.27009000  | 2.63039600  |
| C  | 2.31525500  | 4.04069600  | 1.57417700  | C          | 0.35016300  | -2.15820700 | 2.51080100  |
| C  | 1.24091800  | 4.82566200  | -0.43214200 | C          | 0.85954600  | -3.43435300 | 2.77471700  |
| H  | 5.62616900  | 3.71357000  | 0.82227900  | H          | 0.83492300  | -4.20151800 | 2.01507500  |
| C  | 4.73319600  | 3.77823700  | 1.43694800  | C          | 1.44631000  | -3.72746500 | 4.00896500  |
| C  | 2.39010900  | 3.87604000  | 2.96401700  | H          | 1.84655400  | -4.72206800 | 4.18558400  |
| C  | 3.62578100  | 3.70253700  | 3.58080200  | C          | 1.51742800  | -2.75748400 | 5.00651600  |
| C  | 4.80459400  | 3.68042300  | 2.82100900  | H          | 1.97190300  | -2.98940000 | 5.96526300  |
| H  | 1.47676900  | 3.93752500  | 3.54975100  | C          | 1.00296500  | -1.48266200 | 4.75981100  |
| H  | 3.67615300  | 3.60882500  | 4.66225700  | H          | 1.05689600  | -0.71247800 | 5.52422100  |
| H  | 5.76670600  | 3.56334900  | 3.31027300  | C          | 0.43798400  | -1.18456200 | 3.52276500  |
| N  | 1.10898900  | 4.30657800  | 0.92526000  | H          | 0.08636900  | -0.17651100 | 3.32872700  |



|    |             |             |             |    |             |             |             |
|----|-------------|-------------|-------------|----|-------------|-------------|-------------|
| P  | -0.39739800 | -1.55325900 | 0.93322200  | F  | -8.85212300 | -0.22522300 | -0.52603600 |
| Fe | 1.29674600  | -3.73717300 | -1.08662400 | C  | -0.04283300 | -1.33556900 | -2.53393000 |
| C  | 2.87100500  | -2.45972300 | -0.82818700 | H  | 0.95577700  | -0.99204000 | -2.27700200 |
| C  | 2.91228300  | -3.49312900 | 0.17071800  | C  | -0.03762400 | -1.53399000 | -4.05770100 |
| H  | 2.86884500  | -3.32376300 | 1.23506900  | H  | -0.97899500 | -1.93893700 | -4.42578100 |
| C  | 3.01618400  | -4.75275200 | -0.47909800 | H  | 0.77655500  | -2.21668000 | -4.32369100 |
| C  | 3.04847300  | -4.52039700 | -1.88455500 | H  | 0.15725200  | -0.58468400 | -4.56277800 |
| C  | 2.96681200  | -3.11317600 | -2.10269400 | C  | -2.28525200 | -0.44050900 | -1.90806600 |
| H  | 2.95849000  | -2.63524700 | -3.06955600 | C  | -4.17506600 | 0.68944600  | -0.67319500 |
| C  | 3.97165700  | -0.76491800 | 1.01824700  | C  | -4.35913800 | 1.77531300  | 0.20000500  |
| C  | 5.26816100  | -1.24174400 | 0.75205000  | H  | -3.51305100 | 2.39626000  | 0.46715800  |
| H  | 5.56768000  | -1.45243900 | -0.26966800 | C  | -5.60744900 | 2.03291300  | 0.75025800  |
| C  | 6.16913300  | -1.45392400 | 1.78990400  | C  | -6.70360400 | 1.22470200  | 0.44831400  |
| H  | 7.17012900  | -1.81318900 | 1.56864700  | H  | -7.67474200 | 1.42129100  | 0.88509300  |
| C  | 5.78160300  | -1.22111400 | 3.11398700  | C  | -6.51690800 | 0.16126500  | -0.42896000 |
| H  | 6.48193500  | -1.39938600 | 3.92516200  | C  | -5.27408900 | -0.11338300 | -0.99886800 |
| C  | 4.49576400  | -0.76410400 | 3.38487300  | H  | -5.15218000 | -0.95607500 | -1.66000500 |
| H  | 4.17732900  | -0.58503700 | 4.40684500  | C  | -5.74739500 | 3.12731100  | 1.76977300  |
| C  | 3.59843800  | -0.52787300 | 2.34096200  | C  | -7.64143000 | -0.80604700 | -0.66771600 |
| H  | 2.60323200  | -0.17612000 | 2.56726300  | Cl | -0.89390400 | 2.03428700  | 0.77350000  |
| C  | 3.71338800  | 0.16111500  | -1.71346900 | H  | 1.54147800  | 0.80395600  | 1.38226600  |
| C  | 4.76995200  | 1.02014100  | -1.38648000 | H  | 1.55247500  | 1.63562600  | -0.51207300 |
| H  | 5.03096600  | 1.18828100  | -0.34987600 | Ir | 0.79325000  | 0.36587800  | 0.10526700  |
| C  | 5.48339300  | 1.68007900  | -2.38675000 | C  | -0.58663500 | 1.07949300  | -2.73031000 |
| H  | 6.29317200  | 2.34827800  | -2.10937800 | H  | 0.48988600  | 1.17278900  | -2.86756200 |
| C  | 5.14896300  | 1.50184600  | -3.72877000 | H  | -1.09163700 | 1.11748800  | -3.70306700 |
| H  | 5.70753400  | 2.01496200  | -4.50611900 | H  | -0.90465300 | 1.92328400  | -2.12281400 |
| C  | 4.07574000  | 0.67431800  | -4.06368900 | H  | 0.95773700  | 3.05296900  | 2.10347000  |
| H  | 3.79110800  | 0.53886600  | -5.10333200 | C  | 2.18575600  | 4.16296000  | -0.36860400 |
| C  | 3.35967200  | 0.01795600  | -3.06409700 | C  | 3.87339400  | 3.51896300  | 1.08105800  |
| H  | 2.52050200  | -0.60025100 | -3.35463800 | C  | 2.97574100  | 3.38914900  | 2.17109200  |
| P  | 2.76190500  | -0.67423500 | -0.37099600 | C  | 1.39275000  | 4.63485200  | 0.83980000  |
| H  | -0.41951700 | -5.98318400 | -1.57640000 | H  | 5.90686900  | 3.35592700  | 0.43208900  |
| H  | 3.09063000  | -5.27553900 | -2.65831200 | C  | 5.23361100  | 3.22776600  | 1.27505900  |
| H  | 3.03033100  | -5.71838100 | 0.00881000  | C  | 3.43830600  | 2.86826000  | 3.38656400  |
| S  | -3.07248500 | -1.68291900 | -2.69204200 | C  | 4.78464600  | 2.55436400  | 3.54768600  |
| N  | -0.87463800 | -0.20290700 | -2.02585800 | C  | 5.69267800  | 2.75720100  | 2.49987100  |
| N  | -2.85461600 | 0.48586800  | -1.10540100 | H  | 2.73623000  | 2.75352600  | 4.20870500  |
| H  | -2.18404500 | 1.06629400  | -0.58883300 | H  | 5.13441500  | 2.16440600  | 4.49913100  |
| F  | -5.51264200 | 2.66263000  | 3.02461000  | H  | 6.74485300  | 2.52729800  | 2.63738500  |
| F  | -4.87650000 | 4.13538200  | 1.55856400  | N  | 1.65015100  | 3.78949100  | 1.99942100  |
| F  | -6.99125400 | 3.65269400  | 1.77847600  | N  | 3.39642300  | 3.73931400  | -0.21109900 |
| F  | -7.59483000 | -1.83186400 | 0.22519200  | C  | 1.59301400  | 4.14890600  | -1.72163100 |
| F  | -7.59164600 | -1.35879300 | -1.89592600 | C  | 2.31731700  | 3.57839300  | -2.78441900 |

|                |             |             |             |   |              |             |             |
|----------------|-------------|-------------|-------------|---|--------------|-------------|-------------|
| C              | 0.31046900  | 4.65627000  | -1.98358600 | C | 2.94752400   | -3.86863100 | 0.19348500  |
| C              | 1.77443400  | 3.51366500  | -4.06144800 | H | 3.35132700   | -3.91987300 | 1.19417300  |
| H              | 3.30148900  | 3.18073300  | -2.57712900 | C | 2.44987500   | -4.96924600 | -0.56355200 |
| C              | -0.23359900 | 4.59134300  | -3.26733400 | C | 2.00942300   | -4.47277500 | -1.82762700 |
| H              | -0.27840000 | 5.10006800  | -1.18919800 | C | 2.22415400   | -3.06599600 | -1.85225500 |
| C              | 0.49291800  | 4.01796300  | -4.31106900 | H | 1.98232100   | -2.37817500 | -2.64959100 |
| H              | 2.35030100  | 3.06088000  | -4.86372900 | C | 4.61060300   | -1.21132500 | 1.12788000  |
| H              | -1.22857800 | 4.98826900  | -3.44853300 | C | 5.55163500   | -2.25401900 | 1.14082100  |
| H              | 0.06704400  | 3.96567600  | -5.30936100 | H | 5.58010500   | -2.97357600 | 0.33169700  |
| H              | 1.68728300  | 5.66984300  | 1.07434000  | C | 6.45915300   | -2.37788400 | 2.19066400  |
| H              | 0.31973700  | 4.62223600  | 0.66274100  | H | 7.17571900   | -3.19440600 | 2.18807600  |
| <b>B-TS5OR</b> |             |             |             |   |              |             |             |
| C              | -0.61340900 | -4.49567000 | 0.67060500  | C | 6.45332100   | -1.45054000 | 3.23644900  |
| C              | -1.03426100 | -4.02588300 | -0.60081400 | H | 7.16608100   | -1.54418600 | 4.05105800  |
| H              | -1.42827000 | -4.63092000 | -1.40319200 | C | 5.53331600   | -0.40382200 | 3.22470300  |
| C              | -0.84867000 | -2.61709200 | -0.66230800 | H | 5.52121900   | 0.32763400  | 4.02712900  |
| C              | -0.26454000 | -2.20787100 | 0.59401800  | C | 4.61567200   | -0.28893000 | 2.18038600  |
| C              | -0.15180500 | -3.38202500 | 1.42050500  | H | 3.89514200   | 0.51833400  | 2.18188000  |
| H              | 0.24463100  | -3.41292300 | 2.42278500  | C | 4.56667300   | -0.80101100 | -1.72180200 |
| C              | -1.37521600 | 0.27271800  | 1.41181600  | C | 5.28035000   | -1.90677800 | -2.20918700 |
| C              | -1.51113000 | 1.66509100  | 1.46208500  | H | 5.12319400   | -2.89137400 | -1.78291800 |
| H              | -0.67091000 | 2.29163100  | 1.18807100  | C | 6.17395600   | -1.76027700 | -3.26842500 |
| C              | -2.70445500 | 2.25173500  | 1.89054100  | H | 6.71835100   | -2.62571600 | -3.63593100 |
| H              | -2.78745600 | 3.33452100  | 1.93293700  | C | 6.35855000   | -0.50906800 | -3.85994800 |
| C              | -3.78061600 | 1.44949200  | 2.27531600  | H | 7.05344100   | -0.39506600 | -4.68739000 |
| H              | -4.71223600 | 1.90112400  | 2.60088500  | C | 5.63371400   | 0.58768200  | -3.39500400 |
| C              | -3.66013600 | 0.05964600  | 2.20800800  | H | 5.75393500   | 1.56036200  | -3.86382500 |
| H              | -4.50175800 | -0.57475200 | 2.46728200  | C | 4.73553200   | 0.44539500  | -2.33685600 |
| C              | -2.46708800 | -0.52540700 | 1.78769600  | H | 4.14371900   | 1.28959800  | -2.00717200 |
| H              | -2.39402700 | -1.60519400 | 1.73816800  | P | 3.43249400   | -0.99025000 | -0.27687800 |
| C              | 0.84006900  | -0.80081600 | 2.81066200  | H | -0.60725200  | -5.52622900 | 0.99991900  |
| C              | 1.91371700  | -1.66778200 | 3.05315000  | H | 1.54251500   | -5.05507700 | -2.61087100 |
| H              | 2.35544100  | -2.21798700 | 2.23526000  | H | 2.37860600   | -5.99240500 | -0.21885200 |
| C              | 2.42360800  | -1.83436500 | 4.33855100  | S | -4.00680700  | -2.64236000 | -0.85501200 |
| H              | 3.26356800  | -2.50408200 | 4.49674500  | N | -2.24613300  | -0.73822300 | -1.60072900 |
| C              | 1.87430100  | -1.12264200 | 5.40613100  | N | -4.31279600  | 0.03509000  | -1.01713200 |
| H              | 2.27426800  | -1.24476500 | 6.40860200  | H | -3.81513600  | 0.90968000  | -0.92408600 |
| C              | 0.80914400  | -0.25201000 | 5.17554700  | F | -8.93146300  | 3.10908200  | 1.24235800  |
| H              | 0.37199400  | 0.30559600  | 5.99908500  | F | -7.09603600  | 2.87658900  | 2.38744600  |
| C              | 0.29116900  | -0.09369700 | 3.88847500  | F | -7.05805000  | 3.93590900  | 0.49351800  |
| H              | -0.54057000 | 0.58261000  | 3.73185800  | F | -8.94894000  | -2.50854400 | 0.61400100  |
| P              | 0.25222100  | -0.53268500 | 1.07683200  | F | -8.73170400  | -2.46510800 | -1.54721700 |
| Fe             | 0.96666100  | -3.55399400 | -0.29887800 | F | -10.20568200 | -1.19082600 | -0.57064200 |
| C              | 2.81532600  | -2.67941500 | -0.60151100 | C | -1.15822300  | -1.73006000 | -1.84077700 |
|                |             |             |             | H | -0.27685700  | -1.10816200 | -1.98414600 |

C -1.38590300 -2.48956400 -3.14986700  
 H -2.28859700 -3.10273900 -3.10935100  
 H -0.52268300 -3.12936700 -3.35838000  
 H -1.48124100 -1.77333800 -3.97186900  
 C -3.49520200 -1.07353000 -1.18151300  
 C -5.64552100 0.14485000 -0.60298400  
 C -6.01295300 1.36895700 -0.02785000  
 H -5.27079200 2.15106000 0.08841100  
 C -7.31166100 1.58596800 0.42152200  
 C -8.28584700 0.60052800 0.28433000  
 H -9.29776200 0.76805500 0.62960300  
 C -7.92750200 -0.59961700 -0.33005200  
 C -6.62909900 -0.84003600 -0.77688100  
 H -6.37832700 -1.77726300 -1.24827400  
 C -7.61068600 2.87673400 1.12729100  
 C -8.95452100 -1.69261800 -0.46422500  
 Ir 1.82704000 0.71550200 -0.04527900  
 H 2.21929700 1.10353200 1.43283800  
 Cl 1.45293600 0.26587400 -2.52696800  
 H 0.76164700 2.01938700 -0.00679400  
 C -1.95805000 0.62787400 -2.05822000  
 H -1.91838100 1.33166400 -1.21725100  
 H -0.97503200 0.65304600 -2.52393300  
 H -2.70825400 0.96499000 -2.78159800  
 H 2.52646700 5.80446200 1.20515200  
 H 0.59173800 4.62111900 0.53257000  
 C 1.75386900 3.09811200 -0.51210300  
 C 4.00065500 3.01943400 0.27426500  
 C 3.86796700 4.30881500 0.84694900  
 C 1.51652100 4.05957300 0.66859100  
 H 5.32949500 1.35587800 0.00906600  
 C 5.21320600 2.33817200 0.44510300  
 C 4.93615200 4.88513500 1.54167700  
 H 1.45734700 3.47680500 1.60180700  
 C 6.13294300 4.18976800 1.69667400  
 C 6.26601000 2.90850400 1.15382200  
 H 4.81533000 5.87913000 1.96735000  
 H 6.95193900 4.64288300 2.24747500  
 H 7.18911800 2.35079800 1.27871200  
 N 2.64760300 4.96389100 0.65394500  
 N 2.99875200 2.52694800 -0.58527400  
 C 1.05412700 3.42420900 -1.79461400  
 C 1.77098100 3.46701200 -2.99229800  
 C -0.31673800 3.71277100 -1.80571100

C 1.12730200 3.79832200 -4.18376900  
 H 2.82634900 3.22633100 -2.97294700  
 C -0.96294900 4.03323300 -2.99601500  
 H -0.88940300 3.65774900 -0.88325500  
 C -0.23883700 4.07873900 -4.19091900  
 H 1.69352700 3.82553000 -5.11009800  
 H -2.02801500 4.24840700 -2.99381800  
 H -0.73993400 4.33149600 -5.12103000

**B-TS50S**

C -0.63740700 -4.27983000 1.24513300  
 C -1.06628200 -4.03993300 -0.08481000  
 H -1.45568600 -4.77868600 -0.76836200  
 C -0.89560200 -2.65990100 -0.39024200  
 C -0.31805900 -2.03322600 0.77746100  
 C -0.18621900 -3.04903300 1.78903000  
 H 0.20740500 -2.90455300 2.78203300  
 C -1.45395200 0.56441800 0.95315900  
 C -1.61730100 1.84506800 0.41488700  
 H -0.80895100 2.28876500 -0.15586300  
 C -2.80950000 2.55042600 0.60973400  
 H -2.91528800 3.55100900 0.19839100  
 C -3.85223000 1.97826800 1.34040500  
 H -4.77509800 2.52668800 1.49999500  
 C -3.71681100 0.67578700 1.82969000  
 H -4.54089600 0.20269000 2.35430600  
 C -2.52953900 -0.02638700 1.63805500  
 H -2.43367500 -1.03412700 2.02736500  
 C 0.57819900 -0.19970700 2.78481400  
 C 1.63552700 -0.97026300 3.29195100  
 H 2.15504100 -1.66682600 2.64609500  
 C 2.04489200 -0.83654200 4.61584600  
 H 2.87044300 -1.43906100 4.98269000  
 C 1.41490800 0.08667700 5.45357300  
 H 1.73868600 0.19933200 6.48430900  
 C 0.37340600 0.86720500 4.95503700  
 H -0.11792300 1.59467500 5.59503600  
 C -0.04566500 0.72486100 3.63055400  
 H -0.85175800 1.34614200 3.25996200  
 P 0.17890900 -0.29134900 0.98154800  
 Fe 0.92373900 -3.50743500 0.10931000  
 C 2.80601300 -2.72281600 -0.30099800  
 C 2.89825300 -3.83108500 0.61034700  
 H 3.29149300 -3.79225400 1.61491400  
 C 2.35825600 -4.98477100 -0.02817600

|   |              |             |             |    |             |             |             |
|---|--------------|-------------|-------------|----|-------------|-------------|-------------|
| C | 1.91423600   | -4.60175400 | -1.32858300 | H  | -1.47787300 | -2.48956000 | -3.80963600 |
| C | 2.16953100   | -3.20942500 | -1.49312600 | C  | -3.56123300 | -1.30648800 | -1.18621600 |
| H | 1.89124000   | -2.60070000 | -2.34030700 | C  | -5.73765200 | -0.01948900 | -0.89313600 |
| C | 4.50375600   | -1.13108000 | 1.41282300  | C  | -6.14653600 | 1.31503800  | -0.75323700 |
| C | 5.36558800   | -2.22660600 | 1.59947700  | H  | -5.43837100 | 2.11532900  | -0.93800400 |
| H | 5.38704800   | -3.02779400 | 0.86907800  | C  | -7.44184700 | 1.62975600  | -0.35729400 |
| C | 6.21679200   | -2.28249200 | 2.70101600  | C  | -8.37945300 | 0.62663600  | -0.12570000 |
| H | 6.86996000   | -3.14045500 | 2.83265300  | H  | -9.38938900 | 0.86890300  | 0.17824900  |
| C | 6.24067500   | -1.23235100 | 3.62325600  | C  | -7.98459600 | -0.69745700 | -0.31598300 |
| H | 6.90658600   | -1.27533900 | 4.48061700  | C  | -6.68570200 | -1.03466900 | -0.69422500 |
| C | 5.41812500   | -0.12450300 | 3.42620100  | H  | -6.40534200 | -2.06788000 | -0.82513600 |
| H | 5.43398000   | 0.70678100  | 4.12508900  | C  | -7.77187500 | 3.07361500  | -0.11298400 |
| C | 4.55811900   | -0.07372200 | 2.32796700  | C  | -8.96747100 | -1.80470400 | -0.04109700 |
| H | 3.92662500   | 0.79381100  | 2.18677900  | Ir | 1.91372700  | 0.71766700  | -0.12555500 |
| C | 4.75913200   | -0.93101000 | -1.40220800 | H  | 2.36245900  | 1.03477000  | 1.33660900  |
| C | 6.08073900   | -0.59132400 | -1.07321000 | Cl | 1.29791800  | 0.17734600  | -2.54341000 |
| H | 6.35506600   | -0.39150100 | -0.04499000 | H  | 1.03613800  | 2.18082500  | -0.15552600 |
| C | 7.05835300   | -0.50476800 | -2.06504500 | C  | -2.14192400 | 0.11165100  | -2.59705500 |
| H | 8.07644200   | -0.24300000 | -1.79054500 | H  | -2.08067700 | 1.04667000  | -2.02616000 |
| C | 6.73153500   | -0.75551200 | -3.39801100 | H  | -1.18737600 | 0.01467300  | -3.10859200 |
| H | 7.49452900   | -0.69438400 | -4.16906100 | H  | -2.95284900 | 0.17892000  | -3.32981600 |
| C | 5.41422400   | -1.06641400 | -3.73499800 | H  | 0.73044500  | 4.37628700  | -2.90593900 |
| H | 5.13853100   | -1.22812500 | -4.77277800 | H  | 0.56967400  | 4.44904300  | -0.51184000 |
| C | 4.43204200   | -1.14187300 | -2.74942900 | C  | 2.23065400  | 3.09144400  | -0.20863200 |
| H | 3.40548800   | -1.31595500 | -3.03719200 | C  | 3.39859100  | 2.60754500  | -2.21362900 |
| P | 3.45350700   | -1.02427700 | -0.10032100 | C  | 2.41355500  | 3.25213300  | -2.99682200 |
| H | -0.61858000  | -5.23818800 | 1.74685600  | C  | 1.50989000  | 4.18209100  | -0.99968100 |
| H | 1.41501300   | -5.24209000 | -2.04349400 | H  | 5.31807300  | 1.67920500  | -2.21672800 |
| H | 2.25733100   | -5.96538000 | 0.41772600  | C  | 4.56584500  | 2.15637800  | -2.83232900 |
| S | -4.01540600  | -2.76309300 | -0.48227700 | C  | 2.60363400  | 3.39818900  | -4.37056200 |
| N | -2.33511400  | -1.04913000 | -1.71702100 | H  | 2.17218200  | 5.06988000  | -0.95758100 |
| N | -4.40446400  | -0.20897200 | -1.27145400 | C  | 3.76448700  | 2.91649900  | -4.97649600 |
| H | -3.92330200  | 0.67080700  | -1.40042600 | C  | 4.75327900  | 2.30525100  | -4.20542000 |
| F | -9.09436300  | 3.28831800  | 0.01509400  | H  | 1.83331900  | 3.88557700  | -4.96481200 |
| F | -7.18239700  | 3.52113400  | 1.02943100  | H  | 3.89729400  | 3.03439600  | -6.04834800 |
| F | -7.31846500  | 3.86872600  | -1.10840700 | H  | 5.66448700  | 1.93741500  | -4.66579500 |
| F | -8.89947200  | -2.21469500 | 1.24602600  | N  | 1.25812100  | 3.71546000  | -2.34721400 |
| F | -8.73992300  | -2.88637100 | -0.81380300 | N  | 3.24942400  | 2.41177100  | -0.82026700 |
| F | -10.24126600 | -1.40702500 | -0.25960800 | C  | 2.43987000  | 3.45120900  | 1.24262900  |
| C | -1.20065600  | -2.01725900 | -1.71999700 | C  | 1.35657500  | 3.72388600  | 2.08537100  |
| H | -0.33922200  | -1.39161800 | -1.95542000 | C  | 3.74090800  | 3.52699500  | 1.74981000  |
| C | -1.37814300  | -3.02509100 | -2.86025900 | C  | 1.56893600  | 4.03864500  | 3.42521800  |
| H | -2.26977200  | -3.63854000 | -2.71022500 | H  | 0.34169700  | 3.63486000  | 1.70740500  |
| H | -0.50123400  | -3.67543900 | -2.92938300 | C  | 3.95221200  | 3.84221400  | 3.09243100  |

H 4.56726800 3.30697100 1.08297900  
C 2.86811900 4.09380900 3.93538600  
H 0.71945400 4.22534100 4.07578400  
H 4.96653100 3.89108700 3.47953300  
H 3.03276300 4.33263700 4.98219300

**B-TS5-N**

C -1.16107800 -3.74431800 2.16886800  
C -1.58979000 -3.78415100 0.81606700  
H -2.02860100 -4.63147200 0.31141100  
C -1.33066400 -2.52196200 0.21196500  
C -0.70362200 -1.68536800 1.21014900  
C -0.63051700 -2.45157000 2.42495300  
H -0.21147200 -2.11290600 3.35922300  
C -1.68107800 0.95753800 1.12042200  
C -1.68132400 2.33613700 0.87357500  
H -0.77194700 2.80984900 0.52872000  
C -2.82738500 3.10145300 1.09784800  
H -2.80700000 4.17122300 0.90645600  
C -3.99036900 2.49482400 1.57889900  
H -4.88944600 3.08022400 1.74622000  
C -3.99639400 1.12009400 1.82684800  
H -4.90039300 0.63281700 2.17873700  
C -2.85047700 0.35591500 1.60645000  
H -2.87949900 -0.70925900 1.80073700  
C 0.62175000 0.38875000 2.63733300  
C 1.63005800 -0.43494400 3.15456600  
H 1.94290400 -1.30599900 2.60043600  
C 2.23444900 -0.15779100 4.37868000  
H 3.01945700 -0.81236200 4.74600000  
C 1.85329200 0.96849800 5.10812000  
H 2.32694400 1.19290000 6.05963800  
C 0.85531000 1.80170900 4.60278100  
H 0.54131000 2.67870000 5.16234800  
C 0.23946800 1.51225900 3.38331600  
H -0.54519100 2.16654300 3.02512200  
P -0.09846500 0.01838800 0.96286100  
Fe 0.43580700 -3.34087000 0.89778000  
C 2.29515600 -2.74280200 0.23383100  
C 2.42516100 -3.53253600 1.42786200  
H 2.87550400 -3.21004700 2.35536700  
C 1.85963100 -4.81688200 1.17896500  
C 1.38305700 -4.83656400 -0.16678500  
C 1.64158900 -3.56363500 -0.74807400  
H 1.39423900 -3.23502500 -1.74707000

C 4.24960400 -0.84436800 1.18999600  
C 5.17441700 -1.83850900 1.54711100  
H 5.14510300 -2.80891100 1.06770900  
C 6.15220700 -1.58763700 2.50731300  
H 6.86320800 -2.36719800 2.76626100  
C 6.22367100 -0.33719700 3.12657000  
H 6.99365800 -0.13875500 3.86667700  
C 5.30322400 0.65162600 2.78720200  
H 5.34438100 1.62616400 3.26463000  
C 4.32421100 0.39831200 1.82772500  
H 3.60909700 1.16727100 1.56603700  
C 4.08933100 -1.66045700 -1.58436800  
C 4.69362600 -2.92682700 -1.57309700  
H 4.47749600 -3.62855600 -0.77581500  
C 5.55183700 -3.31432700 -2.60161400  
H 6.01073900 -4.29872600 -2.57514700  
C 5.80652900 -2.44764500 -3.66528100  
H 6.47244600 -2.75024900 -4.46851300  
C 5.18838400 -1.19774900 -3.69849200  
H 5.36374000 -0.52168800 -4.53011000  
C 4.33301200 -0.81019000 -2.66891600  
H 3.84718800 0.15335700 -2.70797800  
P 3.02318200 -1.10992100 -0.16881400  
H -1.19690000 -4.56478000 2.87340100  
H 0.86341800 -5.65657100 -0.64447600  
H 1.76985700 -5.61804600 1.90071300  
S -4.52658900 -2.57015000 -0.09243400  
N -2.66500600 -1.10582600 -1.38726200  
N -4.69095700 -0.08499000 -1.13456200  
H -4.14789000 0.76013900 -1.24918600  
F -9.21828200 3.62995100 0.16829900  
F -7.38762300 3.63910600 1.34480700  
F -7.32168700 4.18075400 -0.75524700  
F -9.53300700 -1.94555500 0.82200600  
F -9.20137700 -2.44341300 -1.26670300  
F -10.64580400 -0.90367000 -0.72515600  
C -1.60437400 -2.14255700 -1.22001500  
H -0.70424600 -1.64237300 -1.57250400  
C -1.84602000 -3.33176900 -2.15253000  
H -2.76827900 -3.85908200 -1.90176400  
H -1.00305500 -4.02596300 -2.08758700  
H -1.91072700 -2.97471200 -3.18497200  
C -3.93003800 -1.22582300 -0.90678800  
C -6.02627500 0.18846400 -0.81069500

|    |             |             |             |            |             |             |             |
|----|-------------|-------------|-------------|------------|-------------|-------------|-------------|
| C  | -6.34565500 | 1.52640100  | -0.55049300 | H          | -0.19706200 | 5.31225200  | -0.78299600 |
| H  | -5.56541300 | 2.27888500  | -0.57536600 | H          | -1.24005100 | 3.32618900  | -1.83175800 |
| C  | -7.64885900 | 1.89901900  | -0.23205500 | <b>B-7</b> |             |             |             |
| C  | -8.66804300 | 0.95226300  | -0.18760900 | C          | -0.72293200 | -4.48669500 | 0.51712000  |
| H  | -9.68235300 | 1.23980600  | 0.05676400  | C          | -1.14289500 | -3.94938900 | -0.72754600 |
| C  | -8.35258200 | -0.37392700 | -0.48844500 | H          | -1.55326400 | -4.50865100 | -1.55450700 |
| C  | -7.05331100 | -0.76687700 | -0.80297700 | C          | -0.93035200 | -2.54247700 | -0.72555100 |
| H  | -6.83639000 | -1.79765100 | -1.03619100 | C          | -0.33428700 | -2.20518000 | 0.54728500  |
| C  | -7.90543000 | 3.33482300  | 0.12411000  | C          | -0.23627800 | -3.41834300 | 1.31573500  |
| C  | -9.43349400 | -1.41955400 | -0.41933500 | H          | 0.17363400  | -3.50231200 | 2.30986500  |
| Ir | 1.61569500  | 0.61695800  | -0.65544000 | C          | -1.28674700 | 0.32480400  | 1.45406400  |
| H  | 2.02182000  | 1.55675600  | 0.54614000  | C          | -1.28275300 | 1.71015300  | 1.66411900  |
| Cl | 1.11095700  | -0.78580000 | -2.77325300 | H          | -0.36069500 | 2.26839300  | 1.55372400  |
| H  | 3.49989200  | 1.25597100  | -0.96157600 | C          | -2.44677100 | 2.37645300  | 2.05189600  |
| C  | -2.30584600 | 0.01469100  | -2.26328600 | H          | -2.42354200 | 3.45034100  | 2.21559000  |
| H  | -2.16092900 | 0.94084900  | -1.68957900 | C          | -3.63230500 | 1.66191200  | 2.24013300  |
| H  | -1.35996100 | -0.21341700 | -2.75214100 | H          | -4.54275000 | 2.17270900  | 2.53845000  |
| H  | -3.07589100 | 0.17059600  | -3.02541800 | C          | -3.64340000 | 0.28060100  | 2.03311600  |
| H  | 6.69307800  | 5.11785300  | -0.17676300 | H          | -4.56269700 | -0.28293000 | 2.15616400  |
| H  | 4.34747600  | 5.44029600  | -0.52308600 | C          | -2.48026200 | -0.38510000 | 1.64822300  |
| C  | 3.98186600  | 3.35641400  | -0.93115700 | H          | -2.51171400 | -1.45593300 | 1.48439900  |
| C  | 5.87574600  | 1.96912800  | -0.65580500 | C          | 0.82886800  | -0.97618100 | 2.82561600  |
| C  | 6.69169500  | 3.09856800  | -0.39739100 | C          | 1.94781200  | -1.79916900 | 3.01250900  |
| C  | 4.71344400  | 4.46228300  | -0.20482000 | H          | 2.44634000  | -2.22977100 | 2.15740600  |
| H  | 5.83877000  | -0.16540500 | -0.82255100 | C          | 2.43067100  | -2.07552900 | 4.28864200  |
| C  | 6.44740100  | 0.69414400  | -0.59914100 | H          | 3.30782000  | -2.70552400 | 4.40274100  |
| C  | 8.04126600  | 2.92013000  | -0.07413600 | C          | 1.80183800  | -1.52399900 | 5.40705200  |
| H  | 4.51900500  | 4.36549200  | 0.88298200  | H          | 2.17955100  | -1.73048400 | 6.40429400  |
| C  | 8.58384100  | 1.64014100  | 0.00099000  | C          | 0.68612200  | -0.70579100 | 5.23392300  |
| C  | 7.78451700  | 0.52415300  | -0.25902500 | H          | 0.18648700  | -0.27473800 | 6.09688500  |
| H  | 8.65854100  | 3.79421600  | 0.12061500  | C          | 0.19831500  | -0.43501000 | 3.95294400  |
| H  | 9.63034000  | 1.51704400  | 0.26448500  | H          | -0.67286700 | 0.19889000  | 3.84157300  |
| H  | 8.19695600  | -0.47765300 | -0.20298000 | P          | 0.27749800  | -0.58624200 | 1.10352000  |
| N  | 6.12401400  | 4.36173500  | -0.53667600 | Fe         | 0.86800600  | -3.52961100 | -0.41726400 |
| N  | 4.53645700  | 2.16435300  | -1.04669300 | C          | 2.73841300  | -2.68804700 | -0.67779000 |
| C  | 2.62007800  | 3.46411700  | -1.34285100 | C          | 2.83571500  | -3.91903900 | 0.05857600  |
| C  | 2.04669400  | 2.31967800  | -2.05402500 | H          | 3.22970700  | -4.03143200 | 1.05797500  |
| C  | 1.80526900  | 4.50930400  | -0.91713000 | C          | 2.31414800  | -4.96629000 | -0.75524300 |
| C  | 0.61387100  | 2.27030600  | -2.14171300 | C          | 1.88840000  | -4.39542600 | -1.99295700 |
| H  | 2.63399500  | 1.89009400  | -2.86071800 | C          | 2.13882100  | -2.99567200 | -1.94676400 |
| C  | 0.41599800  | 4.47835100  | -1.11059900 | H          | 1.91753100  | -2.26234500 | -2.70889600 |
| H  | 2.24014700  | 5.35237200  | -0.38867800 | C          | 4.62738600  | -1.34644000 | 1.07102200  |
| C  | -0.16370800 | 3.35842000  | -1.68689500 | C          | 5.48512700  | -2.45859900 | 1.04508500  |
| H  | 0.16340700  | 1.55849600  | -2.81929800 | H          | 5.42754400  | -3.17603800 | 0.23609700  |

|   |              |             |             |    |             |             |             |
|---|--------------|-------------|-------------|----|-------------|-------------|-------------|
| C | 6.41877500   | -2.65813600 | 2.06010400  | C  | -8.37331000 | 0.57741600  | 0.30279900  |
| H | 7.06831500   | -3.52822800 | 2.02787600  | H  | -9.37812400 | 0.71410700  | 0.68082900  |
| C | 6.52337000   | -1.74028700 | 3.10810500  | C  | -8.02369000 | -0.57639400 | -0.40052400 |
| H | 7.25523400   | -1.89416700 | 3.89604800  | C  | -6.73517400 | -0.77552400 | -0.89332900 |
| C | 5.68875200   | -0.62407000 | 3.13230000  | H  | -6.49025100 | -1.67379900 | -1.43805900 |
| H | 5.76552900   | 0.10307400  | 3.93501600  | C  | -7.69128100 | 2.80502300  | 1.27125400  |
| C | 4.74554200   | -0.43067300 | 2.12348600  | C  | -9.04985400 | -1.66261900 | -0.58685400 |
| H | 4.09563000   | 0.43340600  | 2.15383800  | Ir | 1.93184200  | 0.65884500  | 0.03161200  |
| C | 4.51385700   | -0.80498300 | -1.76351100 | H  | 2.37694900  | 0.93183600  | 1.52175000  |
| C | 5.21596000   | -1.90343800 | -2.28447200 | Cl | 1.41758400  | 0.41046700  | -2.44052300 |
| H | 5.07402600   | -2.89411100 | -1.86753100 | H  | 0.95335800  | 2.22545900  | 0.07537100  |
| C | 6.08015600   | -1.74034000 | -3.36489200 | C  | -1.99634900 | 0.78120000  | -1.92456700 |
| H | 6.61615300   | -2.59934200 | -3.75863400 | H  | -2.05416500 | 1.42041100  | -1.03420700 |
| C | 6.24519900   | -0.48027700 | -3.94370500 | H  | -0.97183400 | 0.84326300  | -2.28601500 |
| H | 6.91696900   | -0.35311700 | -4.78811200 | H  | -2.66517300 | 1.17019800  | -2.70105900 |
| C | 5.53181200   | 0.60823800  | -3.44383900 | H  | 2.78075000  | 5.76651800  | 1.31868700  |
| H | 5.63775000   | 1.58783900  | -3.90103900 | H  | 0.76246200  | 4.62110800  | 0.86866400  |
| C | 4.66353800   | 0.45125300  | -2.36295100 | C  | 1.75222500  | 3.06164300  | -0.29033200 |
| H | 4.08238000   | 1.29163600  | -2.00436100 | C  | 4.10306500  | 2.94568900  | 0.27233000  |
| P | 3.42366000   | -1.04057900 | -0.29336000 | C  | 4.04920200  | 4.25074500  | 0.82812600  |
| H | -0.73339200  | -5.53191700 | 0.79630300  | C  | 1.69071500  | 4.04703500  | 0.89809200  |
| H | 1.40787800   | -4.92542300 | -2.80452600 | H  | 5.37856400  | 1.24723300  | -0.03933600 |
| H | 2.21492500   | -6.00317800 | -0.46255200 | C  | 5.31708800  | 2.24699200  | 0.36694000  |
| S | -4.09884600  | -2.54609300 | -0.98054600 | C  | 5.18353800  | 4.81986600  | 1.41265700  |
| N | -2.31653700  | -0.61470300 | -1.59702400 | H  | 1.72995300  | 3.46540700  | 1.83594700  |
| N | -4.42929800  | 0.12537700  | -1.12568900 | C  | 6.38229300  | 4.11217000  | 1.47737800  |
| H | -3.95627500  | 1.01401500  | -1.04680700 | C  | 6.44003000  | 2.81544200  | 0.96125000  |
| F | -9.00361000  | 2.96784000  | 1.51993400  | H  | 5.11339500  | 5.82440700  | 1.82574900  |
| F | -7.05580700  | 2.78521700  | 2.47473900  | H  | 7.25437400  | 4.56455800  | 1.94000900  |
| F | -7.25104800  | 3.91133500  | 0.63045300  | H  | 7.35932900  | 2.23996400  | 1.01949000  |
| F | -9.02791400  | -2.54174400 | 0.43987900  | N  | 2.82509100  | 4.93148300  | 0.74718800  |
| F | -8.83970500  | -2.36712400 | -1.71763500 | N  | 3.02229900  | 2.43660800  | -0.46156300 |
| F | -10.30320100 | -1.15867600 | -0.64604400 | C  | 1.10367000  | 3.58376900  | -1.55415100 |
| C | -1.22646800  | -1.59921800 | -1.86510900 | C  | 1.85956700  | 3.81455000  | -2.70177500 |
| H | -0.34183500  | -0.97495200 | -1.97053800 | C  | -0.26990800 | 3.84956700  | -1.56757800 |
| C | -1.43920800  | -2.29708300 | -3.21078900 | C  | 1.24809600  | 4.31146500  | -3.85283700 |
| H | -2.34548900  | -2.90619900 | -3.21159800 | H  | 2.91720600  | 3.58127400  | -2.68101300 |
| H | -0.57718500  | -2.93236800 | -3.43631300 | C  | -0.88468800 | 4.33632300  | -2.71910100 |
| H | -1.51899900  | -1.54306300 | -3.99985500 | H  | -0.86603500 | 3.65597700  | -0.67773500 |
| C | -3.58498900  | -0.96752600 | -1.25749800 | C  | -0.12305100 | 4.56992800  | -3.86700700 |
| C | -5.75404500  | 0.20174900  | -0.67137800 | H  | 1.84293400  | 4.48645500  | -4.74480600 |
| C | -6.11159800  | 1.37886000  | -0.00262800 | H  | -1.95347800 | 4.53335100  | -2.72270500 |
| H | -5.36784300  | 2.15214100  | 0.15739100  | H  | -0.59802100 | 4.94957800  | -4.76729700 |
| C | -7.40234600  | 1.55746200  | 0.48729900  |    |             |             |             |

**B-TS6**

|    |             |             |             |   |             |             |             |
|----|-------------|-------------|-------------|---|-------------|-------------|-------------|
| C  | -1.09201500 | -4.95897000 | -0.04821400 | H | 7.29320100  | -1.11288100 | 3.31252500  |
| C  | -1.02489600 | -4.39208400 | -1.34628400 | C | 5.50625900  | -0.06521200 | 2.71446900  |
| H  | -1.09435200 | -4.93885900 | -2.27400100 | H | 5.63315000  | 0.74776200  | 3.42275700  |
| C  | -0.82109700 | -2.98534100 | -1.23661400 | C | 4.40270000  | -0.05379300 | 1.86164600  |
| C  | -0.75033400 | -2.67510700 | 0.18049400  | H | 3.68752100  | 0.75144200  | 1.95063100  |
| C  | -0.93408000 | -3.91167800 | 0.89368000  | C | 3.40849500  | -0.86553700 | -1.90423700 |
| H  | -0.88855600 | -4.02881500 | 1.96451300  | C | 4.69992200  | -1.25655900 | -2.27456700 |
| C  | -2.09603400 | -0.50390700 | 1.47556500  | H | 5.38918400  | -1.63979900 | -1.53287700 |
| C  | -2.21367800 | 0.65321200  | 2.26297800  | C | 5.12415400  | -1.12085200 | -3.59616900 |
| H  | -1.33573700 | 1.25636200  | 2.46707600  | H | 6.13372800  | -1.41631400 | -3.86709900 |
| C  | -3.45106500 | 1.03100000  | 2.77380200  | C | 4.26393800  | -0.60021300 | -4.56558200 |
| H  | -3.53992000 | 1.94180300  | 3.35740100  | H | 4.59984500  | -0.49440500 | -5.59296000 |
| C  | -4.58631100 | 0.25682200  | 2.51181800  | C | 2.97680500  | -0.20143900 | -4.20263200 |
| H  | -5.55258600 | 0.56959000  | 2.89357700  | H | 2.30574300  | 0.22772400  | -4.94129200 |
| C  | -4.47736600 | -0.89105600 | 1.73167600  | C | 2.55855900  | -0.32778500 | -2.87869100 |
| H  | -5.35987800 | -1.47631000 | 1.49264600  | H | 1.58591900  | 0.04324200  | -2.58225600 |
| C  | -3.23409200 | -1.27486800 | 1.21815400  | P | 2.74370900  | -1.07302600 | -0.19350600 |
| H  | -3.16921700 | -2.16288600 | 0.60221400  | H | -1.19664200 | -6.01053900 | 0.18343500  |
| C  | 0.13326200  | -1.61119100 | 2.70603400  | H | 2.24450300  | -5.90971800 | -1.69642600 |
| C  | 1.44374500  | -1.38990300 | 3.13742300  | H | 2.18961200  | -5.99969200 | 1.00370700  |
| H  | 2.13828600  | -0.88954800 | 2.48235000  | S | -3.74803400 | -2.41070200 | -2.15694600 |
| C  | 1.86259200  | -1.78670900 | 4.40830500  | N | -1.53504800 | -0.92379500 | -2.47965600 |
| H  | 2.89031400  | -1.60451900 | 4.71016400  | N | -3.29298400 | 0.23289700  | -1.65573600 |
| C  | 0.96176900  | -2.40117900 | 5.27746900  | H | -2.52719200 | 0.84105100  | -1.35941900 |
| H  | 1.27960300  | -2.70994600 | 6.26927900  | F | -6.62087300 | 4.43133100  | 0.73964000  |
| C  | -0.36167300 | -2.59612800 | 4.87238500  | F | -5.69454500 | 3.29370700  | 2.33770300  |
| H  | -1.07803100 | -3.05059200 | 5.55094800  | F | -4.44915500 | 4.28502700  | 0.85372600  |
| C  | -0.77635800 | -2.19609500 | 3.60272700  | F | -8.03075000 | -1.35868600 | 0.31222900  |
| H  | -1.81421900 | -2.32517900 | 3.31507000  | F | -8.29971300 | -1.01188800 | -1.81577000 |
| P  | -0.41282100 | -1.08686200 | 1.00984600  | F | -9.22680600 | 0.32664300  | -0.36763400 |
| Fe | 0.72392500  | -3.95984300 | -0.30385300 | C | -0.61078300 | -2.07086900 | -2.42605400 |
| C  | 2.45295100  | -2.88466200 | -0.23765100 | H | 0.36308800  | -1.59830000 | -2.27964400 |
| C  | 2.37554400  | -3.77639800 | 0.88945700  | C | -0.56613000 | -2.83866100 | -3.75425300 |
| H  | 2.35832400  | -3.47772700 | 1.92673800  | H | -1.52777300 | -3.31792600 | -3.94905500 |
| C  | 2.30184000  | -5.11021800 | 0.39786900  | H | 0.22399800  | -3.59545900 | -3.73029800 |
| C  | 2.32851000  | -5.06316400 | -1.02794100 | H | -0.34660000 | -2.15681400 | -4.58063300 |
| C  | 2.42910500  | -3.69850100 | -1.42187800 | C | -2.85250900 | -0.99205200 | -2.09679400 |
| H  | 2.46145700  | -3.32672800 | -2.43543400 | C | -4.52533800 | 0.65772100  | -1.14422900 |
| C  | 4.21143000  | -1.07527400 | 0.92684800  | C | -4.49935800 | 1.87329500  | -0.43719300 |
| C  | 5.13735900  | -2.13320800 | 0.88601900  | H | -3.56457700 | 2.40958800  | -0.32547500 |
| H  | 4.98456600  | -2.96392400 | 0.20618300  | C | -5.64841300 | 2.35457200  | 0.17099100  |
| C  | 6.24259200  | -2.14187000 | 1.73399600  | C | -6.85252000 | 1.65105300  | 0.09096400  |
| H  | 6.94918900  | -2.96552300 | 1.68634500  | H | -7.74522300 | 2.02036000  | 0.58073700  |
| C  | 6.43281000  | -1.10377800 | 2.64940500  | C | -6.87410000 | 0.46262300  | -0.62987500 |



|            |             |             |             |    |             |             |             |
|------------|-------------|-------------|-------------|----|-------------|-------------|-------------|
| C          | -5.73331100 | -0.03668100 | -1.26121700 | C  | -0.62515800 | -2.32004800 | -1.99943300 |
| H          | -5.77186300 | -0.97322300 | -1.79555800 | C  | -0.72049700 | -2.56595300 | -0.57196400 |
| C          | -5.59483200 | 3.59549300  | 1.01553900  | C  | -0.99353300 | -3.96905300 | -0.40454800 |
| C          | -8.11233400 | -0.38833900 | -0.63440400 | H  | -1.07354000 | -4.48437200 | 0.53856900  |
| Ir         | 1.04299800  | 0.43708100  | 0.10926200  | C  | -2.23922500 | -1.05335700 | 1.30757100  |
| H          | 1.95679600  | 1.21003300  | 1.20765700  | C  | -2.47734200 | -0.35683800 | 2.50433100  |
| Cl         | -0.81422700 | 1.96704400  | -0.29194100 | H  | -1.64653300 | 0.07863700  | 3.04784200  |
| H          | 0.73658800  | 3.41143900  | 0.76296900  | C  | -3.77297200 | -0.22104300 | 2.99236300  |
| C          | -1.02932500 | 0.23775800  | -3.21809600 | H  | -3.95031800 | 0.34257600  | 3.90304900  |
| H          | -0.39876500 | 0.88172000  | -2.60113700 | C  | -4.84946600 | -0.78428900 | 2.29910000  |
| H          | -0.45514200 | -0.11261200 | -4.08180400 | H  | -5.86018800 | -0.65473600 | 2.67244200  |
| H          | -1.86855900 | 0.82792100  | -3.58877800 | C  | -4.62117200 | -1.48001400 | 1.11527900  |
| H          | 4.34136500  | 3.81509500  | 2.82438000  | H  | -5.45281300 | -1.89118700 | 0.55113200  |
| H          | 2.24994800  | 4.72966100  | 2.41168200  | C  | -3.31913400 | -1.62049500 | 0.62368100  |
| C          | 1.81541900  | 3.51045800  | 0.66842700  | H  | -3.16383900 | -2.15565900 | -0.30410500 |
| C          | 3.73546000  | 2.33888100  | -0.05226000 | C  | -0.08485200 | -2.49819700 | 2.24966400  |
| C          | 4.47233000  | 2.92311600  | 1.00825700  | C  | 1.13758200  | -2.35844900 | 2.90967800  |
| C          | 2.37441300  | 3.68842400  | 2.08668800  | H  | 1.81758100  | -1.58873900 | 2.58329600  |
| H          | 3.82843600  | 1.64089000  | -2.06213700 | C  | 1.47420000  | -3.17836000 | 3.98825500  |
| C          | 4.41077400  | 1.98179200  | -1.21948700 | H  | 2.43785700  | -3.05026600 | 4.47364000  |
| C          | 5.86150900  | 3.04482300  | 0.90580400  | C  | 0.57114600  | -4.14158000 | 4.43617600  |
| H          | 1.78342100  | 3.06102800  | 2.76485500  | H  | 0.82408400  | -4.78343000 | 5.27546000  |
| C          | 6.52489100  | 2.60222700  | -0.23805100 | C  | -0.67802800 | -4.25608300 | 3.81791000  |
| C          | 5.79957300  | 2.08128600  | -1.31024900 | H  | -1.40206200 | -4.97910000 | 4.18322200  |
| H          | 6.42087700  | 3.47649300  | 1.73378400  | C  | -1.01017400 | -3.43327400 | 2.74290400  |
| H          | 7.60598100  | 2.69220000  | -0.29777300 | H  | -1.99936500 | -3.50212500 | 2.30307600  |
| H          | 6.30250200  | 1.77490000  | -2.22217900 | P  | -0.49263900 | -1.39651800 | 0.81282600  |
| N          | 3.78637100  | 3.28494900  | 2.16549900  | Fe | 0.79465400  | -3.64921000 | -1.33713000 |
| N          | 2.33097700  | 2.24436900  | 0.08037200  | C  | 2.50220600  | -2.72974100 | -0.71561200 |
| C          | 2.09043700  | 4.65204400  | -0.29906300 | C  | 2.28208700  | -3.93640400 | 0.03659800  |
| C          | 1.37401600  | 4.67393000  | -1.50431300 | H  | 2.12816800  | -3.99094700 | 1.10404900  |
| C          | 3.04435600  | 5.64722400  | -0.06886800 | C  | 2.26968300  | -5.03237900 | -0.87303000 |
| C          | 1.60073100  | 5.67131400  | -2.44923700 | C  | 2.47644600  | -4.52285700 | -2.18978700 |
| H          | 0.63862500  | 3.89665300  | -1.68720800 | C  | 2.62564600  | -3.10972000 | -2.09594300 |
| C          | 3.27574800  | 6.64754500  | -1.01614300 | H  | 2.78302000  | -2.42812200 | -2.91890000 |
| H          | 3.62600500  | 5.64281900  | 0.84701700  | C  | 3.94652100  | -1.35021300 | 1.25903400  |
| C          | 2.55538700  | 6.66360600  | -2.20902600 | C  | 4.87300600  | -2.40012300 | 1.17580200  |
| H          | 1.03060200  | 5.67755200  | -3.37468700 | H  | 4.85760900  | -3.07214300 | 0.32489700  |
| H          | 4.02458300  | 7.41034500  | -0.82022400 | C  | 5.79777400  | -2.61456600 | 2.19847900  |
| H          | 2.73486700  | 7.44130400  | -2.94635200 | H  | 6.50678600  | -3.43390400 | 2.11869600  |
| <b>B-8</b> |             |             |             | C  | 5.80190100  | -1.79054900 | 3.32526100  |
| C          | -1.04098500 | -4.57862100 | -1.68399200 | H  | 6.51845200  | -1.96237200 | 4.12360300  |
| C          | -0.81652100 | -3.57026100 | -2.65606500 | C  | 4.87251700  | -0.75401800 | 3.42701900  |
| H          | -0.77494700 | -3.72333500 | -3.72369800 | H  | 4.86040400  | -0.11125800 | 4.30241900  |

|   |             |             |             |            |             |             |             |
|---|-------------|-------------|-------------|------------|-------------|-------------|-------------|
| C | 3.95304700  | -0.53880300 | 2.40203900  | C          | -7.96318800 | 0.17469600  | -1.29298000 |
| H | 3.21331400  | 0.24965400  | 2.48886600  | Ir         | 0.96378300  | 0.30505400  | 0.52858600  |
| C | 3.67331000  | -0.32757300 | -1.46689900 | H          | 1.62293700  | 2.40542000  | 1.57767400  |
| C | 4.95867700  | -0.79142500 | -1.78483100 | Cl         | -0.82042800 | 1.91823900  | 1.06463900  |
| H | 5.42975100  | -1.55292800 | -1.17466600 | H          | 0.62622000  | 3.36752300  | -0.25704600 |
| C | 5.64636800  | -0.26992600 | -2.87890700 | C          | -0.59695100 | 1.39497400  | -2.47500300 |
| H | 6.64400800  | -0.63315800 | -3.10982500 | H          | 0.00198700  | 1.57017300  | -1.57606700 |
| C | 5.05521900  | 0.71382400  | -3.67666200 | H          | 0.05753600  | 1.45405200  | -3.35137800 |
| H | 5.59320000  | 1.12056700  | -4.52833700 | H          | -1.36267200 | 2.16633500  | -2.56757900 |
| C | 3.77815800  | 1.17907100  | -3.36859600 | H          | 2.57914000  | 5.28515600  | 2.79101800  |
| H | 3.31848000  | 1.95948400  | -3.96355600 | H          | 1.99837800  | 5.68931600  | 0.49128500  |
| C | 3.09606400  | 0.66500200  | -2.26533600 | C          | 1.66075000  | 3.59487400  | -0.01882900 |
| H | 2.12029100  | 1.04911100  | -1.99883900 | C          | 3.52963900  | 2.63095900  | 1.14403900  |
| P | 2.68457100  | -1.02402800 | -0.06262400 | C          | 3.64947600  | 3.77708300  | 1.95647300  |
| H | -1.17596600 | -5.63416200 | -1.87931700 | C          | 1.64569200  | 4.77948100  | 0.99539900  |
| H | 2.47825100  | -5.10032200 | -3.10479100 | H          | 4.57125400  | 1.10027900  | 0.07865000  |
| H | 2.08125100  | -6.06555100 | -0.61226600 | C          | 4.65922400  | 1.92618300  | 0.76382300  |
| S | -3.44733900 | -1.31387300 | -2.94579000 | C          | 4.90111400  | 4.13777600  | 2.46520300  |
| N | -1.21910800 | 0.07687300  | -2.43455800 | H          | 0.61857200  | 4.94469700  | 1.33169400  |
| N | -3.04771800 | 0.87798800  | -1.36395900 | C          | 6.02540200  | 3.38126800  | 2.12854900  |
| H | -2.32811700 | 1.27344500  | -0.75768500 | C          | 5.91173800  | 2.29302000  | 1.26324100  |
| F | -6.59432600 | 3.87839500  | 2.17679000  | H          | 4.99323600  | 5.01577200  | 3.09993600  |
| F | -6.04110700 | 2.07386200  | 3.24550300  | H          | 6.99675200  | 3.66404100  | 2.52442800  |
| F | -4.49356200 | 3.43911700  | 2.55386800  | H          | 6.78894400  | 1.72227900  | 0.97634900  |
| F | -8.02225500 | -1.11228200 | -0.86676600 | N          | 2.46370200  | 4.47781800  | 2.18913100  |
| F | -7.99005600 | 0.14019600  | -2.64174600 | N          | 2.16821300  | 2.35686400  | 0.70740600  |
| F | -9.09909100 | 0.77771500  | -0.87769700 | C          | 2.36818600  | 3.93047600  | -1.31749200 |
| C | -0.28445000 | -1.03011600 | -2.71238700 | C          | 1.58726300  | 3.98658100  | -2.48030300 |
| H | 0.64705000  | -0.67249600 | -2.26389500 | C          | 3.71883800  | 4.30264100  | -1.41324700 |
| C | -0.06354800 | -1.21959800 | -4.21736100 | C          | 2.12921200  | 4.37710500  | -3.70551800 |
| H | -0.98436200 | -1.55570900 | -4.69926300 | H          | 0.53084800  | 3.74789000  | -2.41744700 |
| H | 0.73265200  | -1.94855000 | -4.39789300 | C          | 4.26792800  | 4.67642300  | -2.63941400 |
| H | 0.24056900  | -0.27357000 | -4.67545100 | H          | 4.34986200  | 4.31458900  | -0.53459300 |
| C | -2.56164000 | -0.07949500 | -2.22853500 | C          | 3.47920300  | 4.71744600  | -3.79026600 |
| C | -4.33473700 | 1.10944400  | -0.86083400 | H          | 1.49499000  | 4.42031500  | -4.58664900 |
| C | -4.39872000 | 1.89345800  | 0.30475900  | H          | 5.31780900  | 4.95074700  | -2.68987700 |
| H | -3.48442400 | 2.26563700  | 0.75083200  | H          | 3.91028100  | 5.02164700  | -4.73990000 |
| C | -5.61670400 | 2.13091200  | 0.92247100  | <b>B-9</b> |             |             |             |
| C | -6.80202100 | 1.60744400  | 0.40098500  | C          | 0.96060300  | -3.53580500 | 2.38758800  |
| H | -7.75045100 | 1.77933800  | 0.89521600  | C          | 0.87086800  | -3.80360400 | 0.99760000  |
| C | -6.73186600 | 0.85530100  | -0.76597800 | H          | 0.99454400  | -4.77273600 | 0.53961600  |
| C | -5.51876300 | 0.61112400  | -1.41286500 | C          | 0.62272000  | -2.58819100 | 0.29364300  |
| H | -5.48980300 | 0.00542700  | -2.30516900 | C          | 0.56604200  | -1.53142500 | 1.28956400  |
| C | -5.67536400 | 2.88595300  | 2.21922900  | C          | 0.76815300  | -2.14464100 | 2.57630300  |

|    |             |             |             |    |             |             |             |
|----|-------------|-------------|-------------|----|-------------|-------------|-------------|
| H  | 0.82857800  | -1.62039300 | 3.51672900  | C  | 5.20379200  | -0.53674600 | -2.35991000 |
| C  | -1.41043200 | 0.58817100  | 1.35200500  | H  | 5.87599500  | -0.54317200 | -1.50800000 |
| C  | -1.86907800 | 1.91100900  | 1.23992600  | C  | 5.68038600  | -0.89730600 | -3.61833400 |
| H  | -1.20324700 | 2.68268100  | 0.86824300  | H  | 6.72028200  | -1.18772600 | -3.73803500 |
| C  | -3.17789300 | 2.22767400  | 1.58959400  | C  | 4.82592900  | -0.88119600 | -4.72521200 |
| H  | -3.53625000 | 3.24533600  | 1.47614700  | H  | 5.20151300  | -1.15979800 | -5.70558200 |
| C  | -4.04297200 | 1.22965300  | 2.04905500  | C  | 3.49379900  | -0.50054300 | -4.56804800 |
| H  | -5.07113100 | 1.47697000  | 2.29307400  | H  | 2.82577000  | -0.47515800 | -5.42430700 |
| C  | -3.59518200 | -0.08537000 | 2.15384800  | C  | 3.01500800  | -0.14778400 | -3.30442300 |
| H  | -4.27688900 | -0.86995100 | 2.46668700  | H  | 1.97533900  | 0.13784900  | -3.17595900 |
| C  | -2.27710800 | -0.40767900 | 1.81646900  | P  | 3.20088500  | 0.32832300  | -0.53673100 |
| H  | -1.94322100 | -1.43503400 | 1.88932600  | H  | 1.18425400  | -4.25691900 | 3.16243200  |
| C  | 1.05307400  | 1.00111600  | 2.61675200  | H  | 4.47004900  | -4.32317800 | 1.07646400  |
| C  | 2.18685300  | 1.81840800  | 2.57519100  | H  | 4.39415800  | -2.79919700 | 3.30557500  |
| H  | 2.64800600  | 2.03628800  | 1.62313900  | S  | -2.36119000 | -3.22405900 | -0.26211100 |
| C  | 2.70833600  | 2.37495800  | 3.74448400  | N  | -0.62622200 | -1.84314100 | -1.76563700 |
| H  | 3.59271300  | 3.00325800  | 3.68746300  | N  | -2.60485600 | -0.79210900 | -1.48475600 |
| C  | 2.08682000  | 2.13394600  | 4.96970800  | H  | -2.03680700 | 0.00478700  | -1.76670500 |
| H  | 2.48758600  | 2.56725100  | 5.88165500  | F  | -6.96762800 | 3.14366000  | -1.61655800 |
| C  | 0.92650900  | 1.35581800  | 5.01551400  | F  | -5.78012400 | 3.47168700  | 0.16933400  |
| H  | 0.41818500  | 1.18999400  | 5.96113300  | F  | -4.83811000 | 3.57462200  | -1.79040300 |
| C  | 0.40486200  | 0.80319900  | 3.84684000  | F  | -6.82043200 | -1.77919300 | 1.71645500  |
| H  | -0.51842500 | 0.23441300  | 3.88864400  | F  | -7.09344300 | -2.91696200 | -0.11451000 |
| P  | 0.37139400  | 0.26287100  | 1.06490300  | F  | -8.38473600 | -1.21485600 | 0.31436800  |
| Fe | 2.38334500  | -2.41549800 | 1.34536300  | C  | 0.57633400  | -2.49834000 | -1.22154000 |
| C  | 3.69399700  | -1.10336800 | 0.48624800  | H  | 1.37696800  | -1.81326700 | -1.51524800 |
| C  | 3.87288800  | -1.12944300 | 1.91435700  | C  | 0.82112300  | -3.85717900 | -1.89154200 |
| H  | 3.73269600  | -0.29116400 | 2.58062600  | H  | 0.03219800  | -4.56265100 | -1.62091500 |
| C  | 4.23100600  | -2.45513600 | 2.29281100  | H  | 1.79378700  | -4.26366900 | -1.59677500 |
| C  | 4.26971900  | -3.26073300 | 1.11610200  | H  | 0.82344200  | -3.74550600 | -2.97962100 |
| C  | 3.94356300  | -2.43256000 | 0.00392900  | C  | -1.86433800 | -1.91545700 | -1.19130700 |
| H  | 3.86946100  | -2.74653300 | -1.02734900 | C  | -3.91102200 | -0.41457200 | -1.15042100 |
| C  | 4.43593800  | 1.60523000  | -0.02876700 | C  | -4.21495400 | 0.94632500  | -1.32961300 |
| C  | 5.64106500  | 1.29674800  | 0.61514400  | H  | -3.45446200 | 1.62223900  | -1.70510900 |
| H  | 5.87586300  | 0.26789100  | 0.86589200  | C  | -5.46526700 | 1.43485500  | -0.97968300 |
| C  | 6.53689000  | 2.31149100  | 0.95652700  | C  | -6.44359700 | 0.59230800  | -0.44778900 |
| H  | 7.46541400  | 2.06121000  | 1.46212100  | H  | -7.41334400 | 0.98017200  | -0.16085400 |
| C  | 6.23981300  | 3.64143800  | 0.65561400  | C  | -6.13955900 | -0.75549900 | -0.29258300 |
| H  | 6.93643000  | 4.42972600  | 0.92640600  | C  | -4.89415600 | -1.27373500 | -0.64901700 |
| C  | 5.04181800  | 3.95644500  | 0.00990200  | H  | -4.67458300 | -2.31942700 | -0.49937700 |
| H  | 4.80130900  | 4.98978300  | -0.22289200 | C  | -5.75575700 | 2.90564900  | -1.06730600 |
| C  | 4.14458900  | 2.94484400  | -0.32851200 | C  | -7.11508900 | -1.66829400 | 0.39442200  |
| H  | 3.19579300  | 3.18797300  | -0.80113900 | Ir | 1.11963200  | 1.10821100  | -0.80319500 |
| C  | 3.86145800  | -0.16739600 | -2.18968600 | Cl |             | -0.63557400 | 2.19648300  |

|                 |             |             |             |    |             |             |             |
|-----------------|-------------|-------------|-------------|----|-------------|-------------|-------------|
| 1.94673000      |             |             |             | C  | -1.82796500 | 2.38817100  | 2.48100300  |
| C               | -0.46399300 | -1.23249500 | -3.08845900 | C  | -2.71459900 | 3.40091700  | 2.88093500  |
| H               | -0.23698900 | -0.16499400 | -3.03167500 | H  | -3.59658800 | 3.61395500  | 2.28462500  |
| H               | 0.35808300  | -1.73423200 | -3.60355100 | C  | -2.47765500 | 4.12997200  | 4.04400100  |
| H               | -1.37563000 | -1.37818300 | -3.67340700 | H  | -3.17287100 | 4.90941900  | 4.34346800  |
| <b>B-9a</b>     |             |             |             | C  | -1.34874000 | 3.85695600  | 4.82233700  |
| H               | 0.32584100  | 0.52730000  | 2.28402400  | H  | -1.16213200 | 4.42571000  | 5.72901900  |
| H               | -1.10172900 | 2.18928500  | 1.23301700  | C  | -0.45841600 | 2.86057300  | 4.42403200  |
| H               | 0.15458500  | 0.52988600  | -2.05054300 | H  | 0.43664100  | 2.65713000  | 5.00329700  |
| H               | -0.92293800 | 2.39274400  | -1.27460800 | C  | -0.69604800 | 2.13111100  | 3.25761800  |
| C               | -0.62835700 | 1.39504900  | 0.64095500  | H  | 0.00563300  | 1.37063900  | 2.94922600  |
| C               | 1.57584400  | 0.28799400  | 0.69890100  | C  | -3.88767500 | 0.84242900  | 1.25632800  |
| C               | 1.67227600  | 0.37613100  | -0.70819000 | C  | -4.78817400 | 0.58921400  | 0.21362000  |
| C               | -0.09186000 | 2.03617300  | -0.66151400 | H  | -4.52439700 | 0.86381700  | -0.79735200 |
| H               | 2.46928400  | -0.50876300 | 2.48463700  | C  | -6.01691200 | -0.02078600 | 0.46241200  |
| C               | 2.54186800  | -0.44763600 | 1.40069200  | H  | -6.69986700 | -0.20774100 | -0.36171700 |
| C               | 2.70917000  | -0.28701300 | -1.36806100 | C  | -6.35624600 | -0.40508400 | 1.76016900  |
| H               | 0.52403000  | 2.89924900  | -0.38334800 | H  | -7.31009500 | -0.88681100 | 1.95640300  |
| C               | 3.64735000  | -1.04019900 | -0.66491400 | C  | -5.45902900 | -0.17081300 | 2.80411500  |
| C               | 3.56472000  | -1.10984800 | 0.72749800  | H  | -5.70972200 | -0.47425200 | 3.81670800  |
| H               | 2.76450200  | -0.19789900 | -2.44984700 | C  | -4.23426000 | 0.44858600  | 2.55766600  |
| H               | 4.44235900  | -1.55351500 | -1.19712400 | H  | -3.53877500 | 0.60930200  | 3.37249900  |
| H               | 4.29579200  | -1.68029700 | 1.29327300  | P  | -2.18292600 | 1.45815000  | 0.92609300  |
| N               | 0.71857900  | 1.12365800  | -1.44987300 | Fe | -2.56238600 | 2.86389400  | -2.23058800 |
| N               | 0.53815200  | 0.93459500  | 1.38168700  | C  | -2.01807200 | 0.98095300  | -2.84997700 |
| C               | -1.68113200 | 0.33900000  | 0.34465900  | C  | -3.41691100 | 1.20297200  | -3.10304300 |
| C               | -1.34775800 | -0.99826200 | 0.09478900  | H  | -4.22519500 | 0.60370800  | -2.71481400 |
| C               | -3.02657200 | 0.72109500  | 0.26625200  | C  | -3.55745900 | 2.32119600  | -3.97288500 |
| C               | -2.33888600 | -1.92588500 | -0.23113000 | C  | -2.25235100 | 2.80305900  | -4.27862200 |
| H               | -0.31401700 | -1.31967700 | 0.16473600  | C  | -1.30997400 | 1.98294600  | -3.59312500 |
| C               | -4.01728800 | -0.20309200 | -0.06055000 | H  | -0.24002900 | 2.11131700  | -3.62194900 |
| H               | -3.29846500 | 1.75557600  | 0.46698400  | C  | -2.68865800 | -1.59881000 | -2.04811200 |
| C               | -3.67483400 | -1.53295600 | -0.31234000 | C  | -3.19877100 | -1.90826000 | -3.32225600 |
| H               | -2.06352000 | -2.95993300 | -0.42011600 | H  | -2.73868300 | -1.47951800 | -4.20703700 |
| H               | -5.05586800 | 0.11229200  | -0.11189000 | C  | -4.30432500 | -2.74386100 | -3.45773000 |
| H               | -4.44422100 | -2.25732300 | -0.56417600 | H  | -4.68596700 | -2.97765400 | -4.44779100 |
| <b>TS5OS-ET</b> |             |             |             | C  | -4.93072600 | -3.26815400 | -2.32100000 |
| C               | -3.34411100 | 4.61620600  | -1.41342400 | H  | -5.80090600 | -3.91005700 | -2.42856200 |
| C               | -1.92885100 | 4.70474000  | -1.53821600 | C  | -4.43835500 | -2.96067300 | -1.05477900 |
| H               | -1.39274000 | 5.42332400  | -2.14208400 | H  | -4.91457600 | -3.35788100 | -0.16454800 |
| C               | -1.33738800 | 3.63099800  | -0.80183200 | C  | -3.31891700 | -2.13560700 | -0.91833700 |
| C               | -2.41316200 | 2.87554200  | -0.19815400 | H  | -2.93195100 | -1.88732500 | 0.06603600  |
| C               | -3.64331400 | 3.50451700  | -0.57911500 | C  | -0.00589200 | -0.95899800 | -3.00253300 |
| H               | -4.63005500 | 3.16155500  | -0.30584700 | C  | 1.08928800  | -0.10991100 | -3.22911400 |

|    |             |             |             |                 |             |             |             |
|----|-------------|-------------|-------------|-----------------|-------------|-------------|-------------|
| H  | 1.18102600  | 0.81145100  | -2.66319200 | H               | -0.61036900 | 5.00136100  | 1.02265400  |
| C  | 2.08104100  | -0.44581700 | -4.14519900 | H               | 0.31406800  | 4.43582200  | 2.42986200  |
| H  | 2.92459300  | 0.22051900  | -4.29451100 | H               | 1.12976900  | 5.39579200  | 1.18683200  |
| C  | 2.01714000  | -1.66051500 | -4.83076500 | C               | 1.09214000  | -3.09944000 | 0.77819800  |
| H  | 2.80516800  | -1.93481100 | -5.52470700 | C               | -0.80046000 | -4.37073000 | 1.53926000  |
| C  | 0.95939600  | -2.53265600 | -4.58471300 | C               | -1.22200400 | -4.60546500 | 0.22097700  |
| H  | 0.91108000  | -3.49091100 | -5.09422400 | C               | 0.91826800  | -3.76822000 | -0.57547300 |
| C  | -0.04899500 | -2.18301400 | -3.68292400 | H               | -1.19076800 | -4.60675000 | 3.63491100  |
| H  | -0.87030200 | -2.87142500 | -3.52329600 | C               | -1.54321000 | -4.82429000 | 2.63136100  |
| P  | -1.30352700 | -0.38525000 | -1.81350300 | C               | -2.42075600 | -5.29172200 | 0.01640100  |
| H  | -4.06693700 | 5.25741000  | -1.90035500 | H               | 1.53927900  | -4.67801300 | -0.56086700 |
| H  | -2.01369800 | 3.66539800  | -4.88716100 | C               | -3.17723900 | -5.73159700 | 1.10189500  |
| H  | -4.49275500 | 2.74772400  | -4.31044100 | C               | -2.73629200 | -5.50628400 | 2.40982500  |
| S  | 2.64906100  | 3.01915000  | 2.38943600  | H               | -2.74797200 | -5.46953700 | -1.00260900 |
| N  | 0.66956600  | 3.40584600  | 0.63709400  | H               | -4.10814900 | -6.26262600 | 0.92532500  |
| N  | 1.96238200  | 1.53323100  | 0.22367100  | H               | -3.32186300 | -5.85542400 | 3.25435900  |
| F  | 5.51539500  | -2.71984900 | -1.74234100 | N               | -0.45493300 | -4.14190300 | -0.87291700 |
| F  | 3.38972500  | -2.60891200 | -2.18921100 | N               | 0.37023200  | -3.62219700 | 1.75747800  |
| F  | 4.84093700  | -1.65190600 | -3.49962400 | C               | 2.37509800  | -2.46358700 | 1.18384300  |
| F  | 6.69740600  | 3.34092600  | -0.11124200 | C               | 2.39560000  | -1.30183800 | 1.96579900  |
| F  | 7.82954400  | 1.78295200  | -1.13059800 | C               | 3.58617200  | -3.07517200 | 0.83017700  |
| F  | 7.37661200  | 1.59175500  | 0.98634200  | C               | 3.60740900  | -0.73993500 | 2.36094000  |
| C  | 0.13046500  | 3.29176100  | -0.74335700 | H               | 1.46024600  | -0.81720500 | 2.21329500  |
| H  | 0.21219500  | 2.24414300  | -1.01672400 | C               | 4.79634900  | -2.52130600 | 1.24689000  |
| C  | 0.99140200  | 4.12930300  | -1.69621100 | H               | 3.59171500  | -3.97299400 | 0.22202600  |
| H  | 0.98422500  | 5.18723900  | -1.41523900 | C               | 4.81109700  | -1.34772600 | 2.00150800  |
| H  | 0.62889400  | 4.04604000  | -2.72471800 | H               | 3.60186000  | 0.19955700  | 2.90463200  |
| H  | 2.02500900  | 3.77300100  | -1.66014400 | H               | 5.72752600  | -2.99150700 | 0.94915700  |
| C  | 1.73280900  | 2.65272200  | 1.02694400  | H               | 5.75547100  | -0.88785400 | 2.27704800  |
| C  | 3.20078900  | 1.06883400  | -0.20798900 | H               | 0.58478400  | -3.37319300 | 2.73743000  |
| C  | 3.25165200  | -0.15246800 | -0.90708500 | H               | -0.94735600 | -3.40928300 | -1.37453600 |
| H  | 2.34264500  | -0.72180800 | -1.03770400 | H               | 0.22418000  | -1.65574700 | 0.18770300  |
| C  | 4.45942600  | -0.62576800 | -1.40662600 | H               | 1.12874600  | 0.90836100  | 0.08055400  |
| C  | 5.65000700  | 0.07684700  | -1.21472300 | O               | 0.62308400  | -2.92389900 | 4.46985400  |
| H  | 6.59057000  | -0.30946300 | -1.58725100 | H               | 0.12113500  | -2.13415900 | 4.17895600  |
| C  | 5.59454000  | 1.28316000  | -0.52561200 | C               | 1.84333100  | -2.49756700 | 5.09530200  |
| C  | 4.39206400  | 1.79343000  | -0.04221800 | H               | 2.04130400  | -3.20767400 | 5.90575300  |
| H  | 4.38737700  | 2.73412700  | 0.48714900  | H               | 2.66752800  | -2.56809100 | 4.37510800  |
| C  | 4.53896800  | -1.89766100 | -2.19924700 | C               | 1.74460900  | -1.07746400 | 5.63399600  |
| C  | 6.87129400  | 2.00543500  | -0.20217300 | H               | 2.67862100  | -0.78851600 | 6.12844900  |
| Cl | -1.06717100 | -1.01429200 | 2.69720900  | H               | 1.56036100  | -0.36624100 | 4.82064200  |
| H  | 1.29480100  | -3.12650400 | -1.36732500 | H               | 0.92670800  | -0.99116800 | 6.35784200  |
| Ir | -0.83281600 | -0.31193400 | 0.35614700  | <b>TS5OR-ET</b> |             |             |             |
| C  | 0.35858800  | 4.63644100  | 1.36223200  | C               | -4.18212600 | 2.72832400  | -3.08388000 |

|    |             |             |             |   |             |             |             |
|----|-------------|-------------|-------------|---|-------------|-------------|-------------|
| C  | -2.79748200 | 2.92127800  | -3.34623600 | C | -4.29981300 | -3.14133500 | 1.82348200  |
| H  | -2.37330800 | 3.29663200  | -4.26687400 | H | -4.44739000 | -3.03277800 | 2.89341400  |
| C  | -2.05405500 | 2.46339600  | -2.21581400 | C | -3.29989600 | -2.39995700 | 1.19328200  |
| C  | -2.99872200 | 1.98494400  | -1.23115100 | H | -2.67029400 | -1.72684600 | 1.76602500  |
| C  | -4.31023100 | 2.17348400  | -1.78161300 | C | -0.69521600 | -2.98354900 | -1.60811000 |
| H  | -5.23978500 | 1.91245900  | -1.30102600 | C | 0.32023200  | -2.76906800 | -2.55074100 |
| C  | -2.36146600 | 2.99156500  | 1.28442200  | H | 0.51689400  | -1.77195600 | -2.92543600 |
| C  | -3.46850600 | 3.85547000  | 1.28640700  | C | 1.10418900  | -3.82347200 | -3.01715800 |
| H  | -4.40158600 | 3.53974800  | 0.82972000  | H | 1.87691000  | -3.62706600 | -3.75047400 |
| C  | -3.38384500 | 5.11459800  | 1.87640200  | C | 0.90960200  | -5.11493700 | -2.52458300 |
| H  | -4.24908200 | 5.77181600  | 1.87174400  | H | 1.52286700  | -5.93588400 | -2.88553700 |
| C  | -2.18868900 | 5.52795500  | 2.47133800  | C | -0.08150200 | -5.34133000 | -1.57002400 |
| H  | -2.11975800 | 6.51057100  | 2.92977100  | H | -0.24412700 | -6.34060800 | -1.17519600 |
| C  | -1.08371200 | 4.67734700  | 2.46746600  | C | -0.87971400 | -4.28704600 | -1.12158200 |
| H  | -0.14387000 | 4.99265800  | 2.90837800  | H | -1.65302900 | -4.48919900 | -0.39097300 |
| C  | -1.16923700 | 3.41522000  | 1.87654300  | P | -1.70211200 | -1.55598100 | -0.96398700 |
| H  | -0.30741800 | 2.76525400  | 1.87628200  | H | -4.99508200 | 2.93157300  | -3.76840300 |
| C  | -4.09242900 | 0.74769500  | 1.16242800  | H | -2.40262300 | 0.37014400  | -5.62804000 |
| C  | -5.07387700 | 0.06065800  | 0.43636600  | H | -4.88109800 | -0.33534200 | -4.81190100 |
| H  | -4.95793700 | -0.08172900 | -0.62887900 | S | 2.00176000  | 4.53236200  | 0.15897100  |
| C  | -6.19241500 | -0.47111900 | 1.07742700  | N | -0.11086500 | 3.40930900  | -1.03529100 |
| H  | -6.94087800 | -1.00176500 | 0.49593600  | N | 1.49661100  | 1.91613100  | -0.31184000 |
| C  | -6.33043400 | -0.35180600 | 2.45952500  | F | 5.14408200  | -1.64622500 | -3.47036100 |
| H  | -7.19745400 | -0.77270300 | 2.96097600  | F | 3.73425800  | -2.62538900 | -2.14418700 |
| C  | -5.33762100 | 0.29724800  | 3.19782900  | F | 3.00178600  | -1.38631900 | -3.76837700 |
| H  | -5.42724900 | 0.38144000  | 4.27733700  | F | 6.54495000  | 3.41670600  | -0.98939900 |
| C  | -4.22805300 | 0.84526400  | 2.55663100  | F | 7.53251600  | 1.48825100  | -0.78818100 |
| H  | -3.45589600 | 1.33835300  | 3.13802700  | F | 6.49003900  | 2.36911200  | 0.91073700  |
| P  | -2.52109100 | 1.36276000  | 0.42246800  | C | -0.55789300 | 2.44496000  | -2.07808600 |
| Fe | -3.14305200 | 0.92178000  | -2.96313700 | H | -0.30764300 | 1.44531600  | -1.72605100 |
| C  | -2.47280000 | -0.98320800 | -2.54133200 | C | 0.18758100  | 2.71953700  | -3.38919300 |
| C  | -3.85491300 | -1.01049900 | -2.94100600 | H | 0.00580900  | 3.73727500  | -3.74857700 |
| H  | -4.67597300 | -1.36689400 | -2.33893800 | H | -0.12632300 | 2.01932300  | -4.16901600 |
| C  | -3.96232800 | -0.47471500 | -4.25762500 | H | 1.26378900  | 2.60383100  | -3.23027100 |
| C  | -2.65547200 | -0.10567100 | -4.68973600 | C | 1.10028900  | 3.24115200  | -0.42782900 |
| C  | -1.74491900 | -0.40631800 | -3.63482300 | C | 2.75020700  | 1.40789200  | -0.68239800 |
| H  | -0.68660400 | -0.19258700 | -3.64251300 | C | 2.77359400  | 0.23341300  | -1.45058100 |
| C  | -3.10055200 | -2.49979900 | -0.18926400 | H | 1.83473500  | -0.25827500 | -1.68299700 |
| C  | -3.91246600 | -3.37703000 | -0.92674400 | C | 3.98334100  | -0.26547800 | -1.93326000 |
| H  | -3.74177100 | -3.50733500 | -1.99049500 | C | 5.18929600  | 0.36767700  | -1.63882400 |
| C  | -4.92077200 | -4.10787900 | -0.30000800 | H | 6.12578800  | -0.02713600 | -2.00599000 |
| H  | -5.54381300 | -4.77870300 | -0.88533900 | C | 5.16008600  | 1.50366400  | -0.83600800 |
| C  | -5.11860100 | -3.98882700 | 1.07875200  | C | 3.96329800  | 2.02813700  | -0.35563100 |
| H  | -5.90498500 | -4.55855500 | 1.56637800  | H | 3.95446200  | 2.91416000  | 0.26291400  |

|    |             |             |             |   |            |            |            |
|----|-------------|-------------|-------------|---|------------|------------|------------|
| C  | 3.97689500  | -1.47342800 | -2.82220300 | C | 2.15788200 | 3.17192900 | 3.93945700 |
| C  | 6.43412100  | 2.19192500  | -0.43464500 | H | 2.36413000 | 4.11790600 | 3.42695700 |
| Cl | -0.48082100 | 0.43227900  | 2.92160300  | H | 1.07253300 | 3.07355300 | 4.05283300 |
| H  | 1.22684800  | -3.84305100 | 0.40608600  | H | 2.60935900 | 3.19623500 | 4.93697400 |
| Ir | -0.84577800 | -0.22130700 | 0.59604000  |   |            |            |            |
| C  | -0.68659800 | 4.75044200  | -1.10527000 |   |            |            |            |
| H  | -1.73829200 | 4.66166200  | -1.37639700 |   |            |            |            |
| H  | -0.60786100 | 5.22747600  | -0.13091800 |   |            |            |            |
| H  | -0.16153000 | 5.37454100  | -1.83794000 |   |            |            |            |
| C  | 1.71585200  | -2.17947600 | 1.69865000  |   |            |            |            |
| C  | 4.02545800  | -1.51528300 | 1.42425500  |   |            |            |            |
| C  | 4.32622500  | -2.73023100 | 0.77028300  |   |            |            |            |
| C  | 1.97064200  | -3.05547500 | 0.47910200  |   |            |            |            |
| H  | 4.78413600  | 0.34404300  | 2.18556600  |   |            |            |            |
| C  | 5.02981700  | -0.57585000 | 1.66941200  |   |            |            |            |
| C  | 5.63929500  | -2.96974400 | 0.35292300  |   |            |            |            |
| H  | 1.90811400  | -2.43730900 | -0.42071100 |   |            |            |            |
| C  | 6.63479200  | -2.02757100 | 0.59997700  |   |            |            |            |
| C  | 6.33520600  | -0.83311900 | 1.26183500  |   |            |            |            |
| H  | 5.87009200  | -3.89834000 | -0.16220600 |   |            |            |            |
| H  | 7.64999100  | -2.22455000 | 0.26849900  |   |            |            |            |
| H  | 7.10755800  | -0.09527100 | 1.44183000  |   |            |            |            |
| N  | 3.29149100  | -3.64656300 | 0.63976200  |   |            |            |            |
| N  | 2.74652600  | -1.37413800 | 1.98931500  |   |            |            |            |
| C  | 0.82461900  | -2.61025800 | 2.79480000  |   |            |            |            |
| C  | 1.15828700  | -2.34911000 | 4.13171200  |   |            |            |            |
| C  | -0.34701200 | -3.32941600 | 2.51613200  |   |            |            |            |
| C  | 0.32771600  | -2.78364400 | 5.16322300  |   |            |            |            |
| H  | 2.07204900  | -1.81848900 | 4.37369800  |   |            |            |            |
| C  | -1.16568200 | -3.77452000 | 3.54445400  |   |            |            |            |
| H  | -0.63703100 | -3.49979200 | 1.48735300  |   |            |            |            |
| C  | -0.83419300 | -3.49699700 | 4.87466400  |   |            |            |            |
| H  | 0.59566100  | -2.56643400 | 6.19275800  |   |            |            |            |
| H  | -2.07450300 | -4.31796400 | 3.30621100  |   |            |            |            |
| H  | -1.47919900 | -3.83816800 | 5.67944500  |   |            |            |            |
| H  | 2.64775200  | -0.63442400 | 2.71310500  |   |            |            |            |
| H  | 0.50661600  | -1.25749500 | 0.80537800  |   |            |            |            |
| H  | 3.47585500  | -4.41537100 | 0.00763300  |   |            |            |            |
| H  | 0.73739400  | 1.20064000  | -0.25930500 |   |            |            |            |
| O  | 2.45960900  | 0.74740000  | 3.76219500  |   |            |            |            |
| H  | 1.48130800  | 0.63637300  | 3.73618500  |   |            |            |            |
| C  | 2.70845900  | 2.01292100  | 3.12263800  |   |            |            |            |
| H  | 3.79531700  | 2.09585800  | 3.02139400  |   |            |            |            |
| H  | 2.27125700  | 2.01617700  | 2.11802200  |   |            |            |            |

## 12. Supporting references for DFT calculation

8. Petersson, G. A.; Bennett, A.; Tensfeldt, T. G.; Al-Laham, M. A.; Shirley, W. A.; Mantzaris, J., A complete basis set model chemistry. I. The total energies of closed-shell atoms and hydrides of the first-row elements, *J. Chem. Phys.*, **1988**, *89* (4), 2193-2218.
9. Becke, A. D., Density-functional thermochemistry. III. The role of exact exchange, *J. Chem. Phys.*, **1993**, *98* (7), 5648-5652.
10. Yang, T.; Sun, Y.; Wang, H.; Lin, Z.; Wen, J.; Zhang, X., Iridium-Catalyzed Enantioselective Hydrogenation of Oxocarbenium Ions: A Case of Ionic Hydrogenation, *Angew. Chem. Int. Ed.*, **2020**, *59* (15), 6108-6114.
11. Wen, J. L.; Fan, X. R.; Tan, R. C.; Chien, H. C.; Zhou, Q. H.; Chung, L. W.; Zhang, X. M., Brønsted-Acid-Promoted Rh-Catalyzed Asymmetric Hydrogenation of N-Unprotected Indoles: A Cocatalysis of Transition Metal and Anion Binding, *Org. Lett.*, **2018**, *20*, 2143–2147.
12. Marenich, A. V.; Cramer, C. J.; Truhlar, D. G., Universal solvation model based on solute electron density and on a continuum model of the solvent defined by the bulk dielectric constant and atomic surface tensions, *J. Phys. Chem B.*, **2009**, *113* (18), 6378- 96.



## 13. NMR spectra

Note: All the target compounds are correctly identified and of high purity. However, it is unavoidable that the sample will be contaminated during the post-processing stage due to the presence of vacuum grease, plastic or high-boiling impurities in solvents. Accordingly, a few of the compounds show an impurity peak at approximately 1.25 ppm in the  $^1\text{H}$  NMR spectra. However, this does not affect the structural identification.

### $^1\text{H}$ NMR spectra for 2a

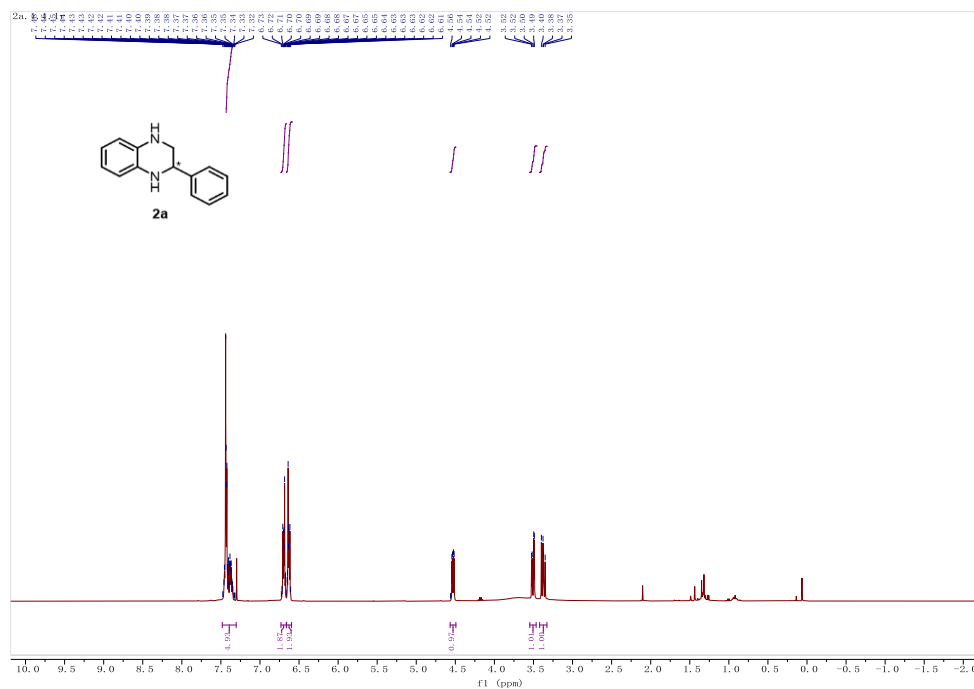

### $^{13}\text{C}$ NMR spectra for 2a

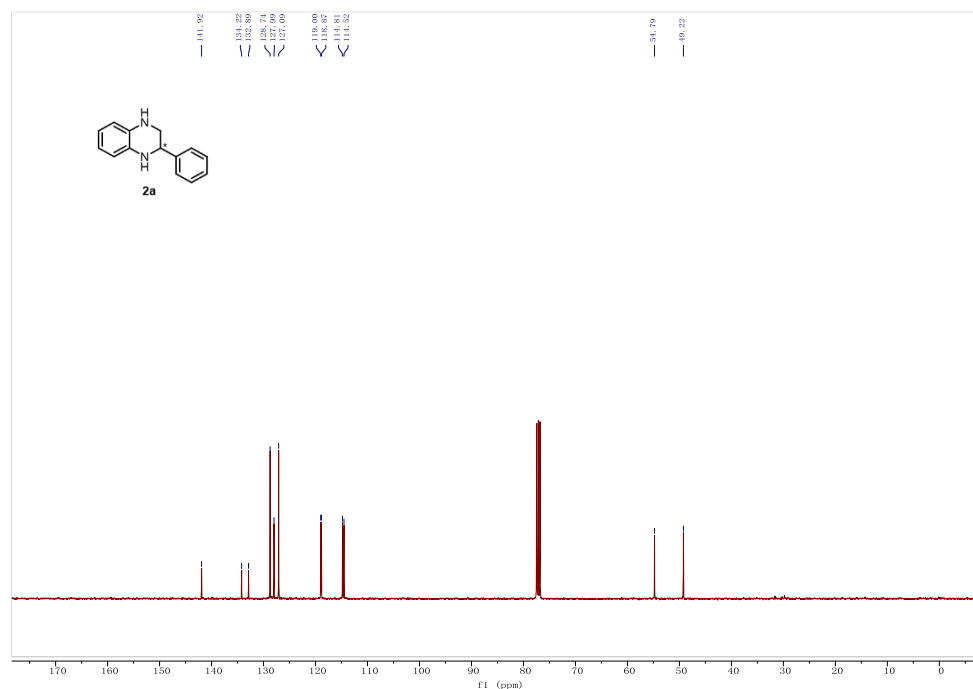

# <sup>1</sup>H NMR spectra for 2b

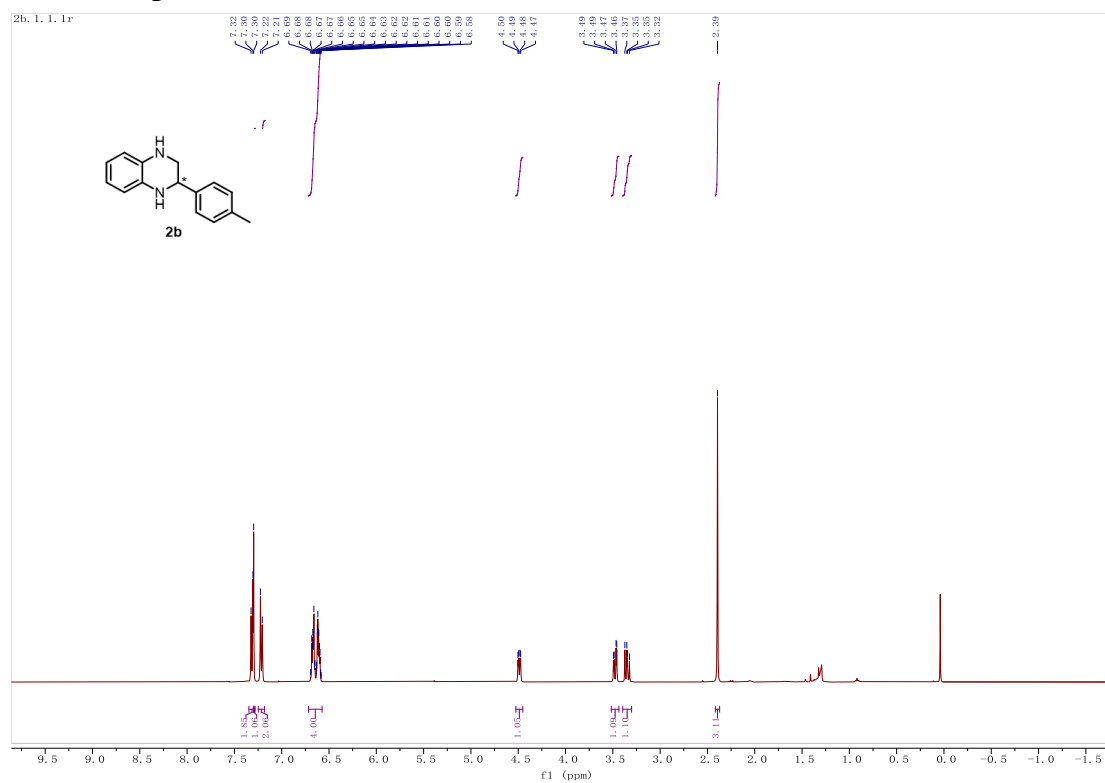

# <sup>13</sup>C NMR spectra for 2b

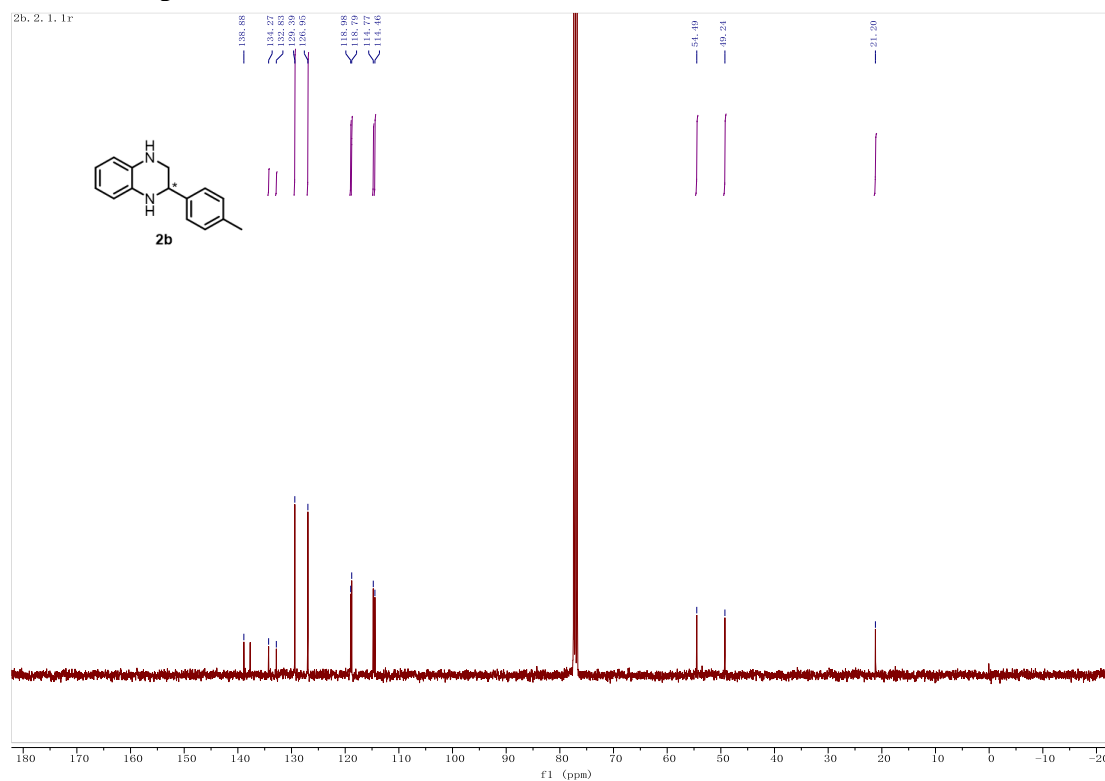

### <sup>1</sup>H NMR spectra for 2c

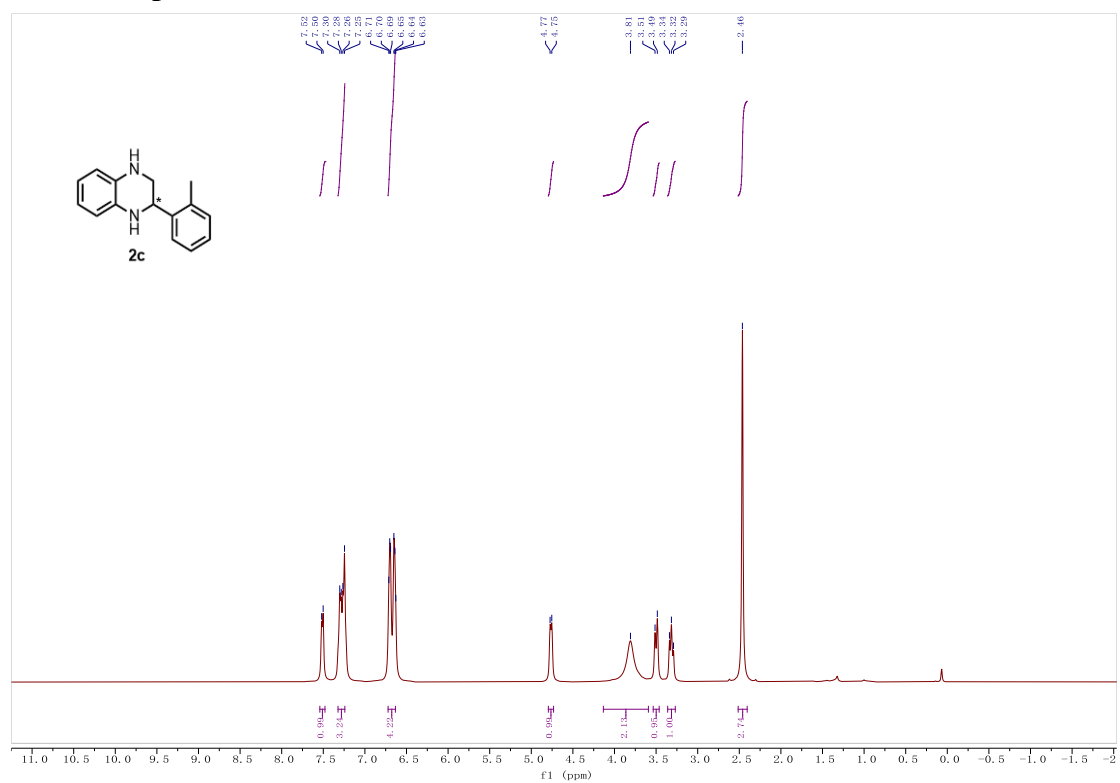

### <sup>13</sup>C NMR spectra for 2c

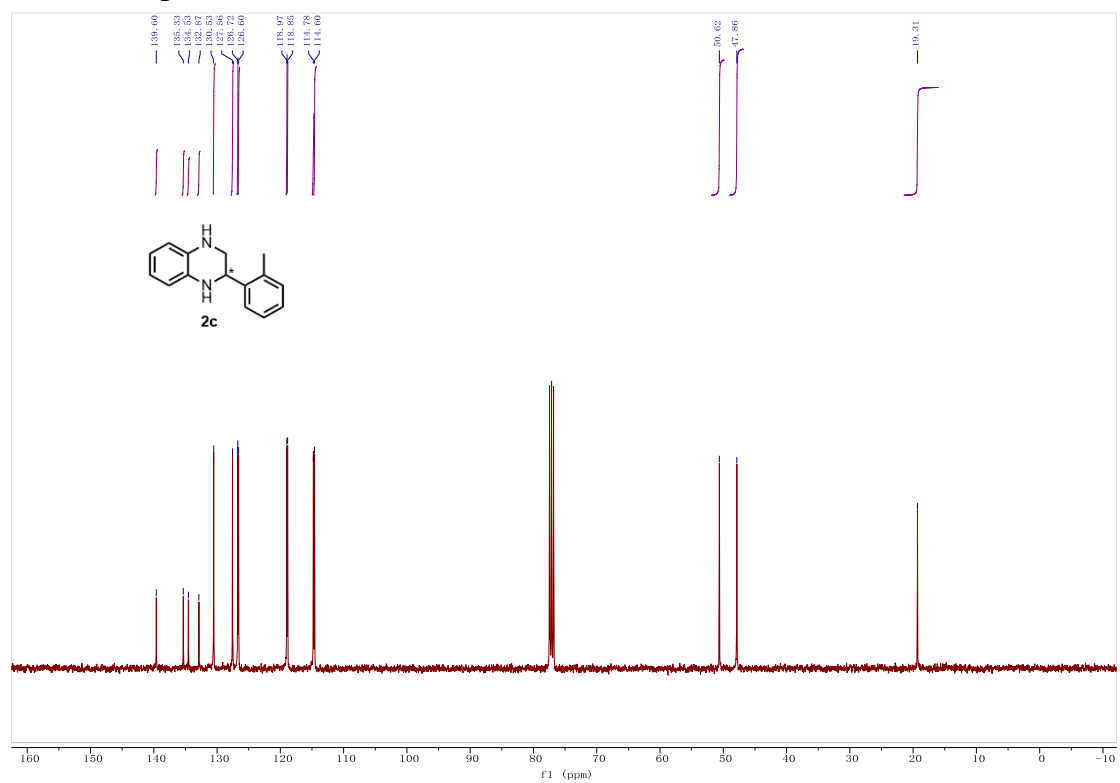

### <sup>1</sup>H NMR spectra for 2d

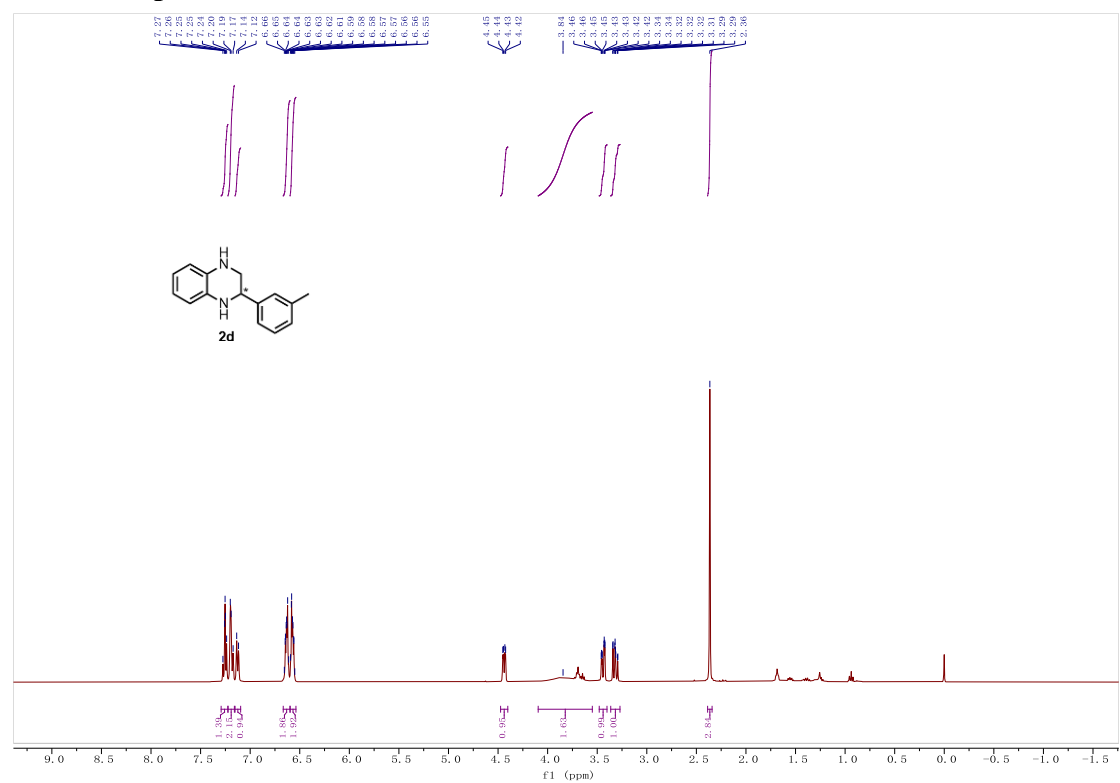

### <sup>13</sup>C NMR spectra for 2d

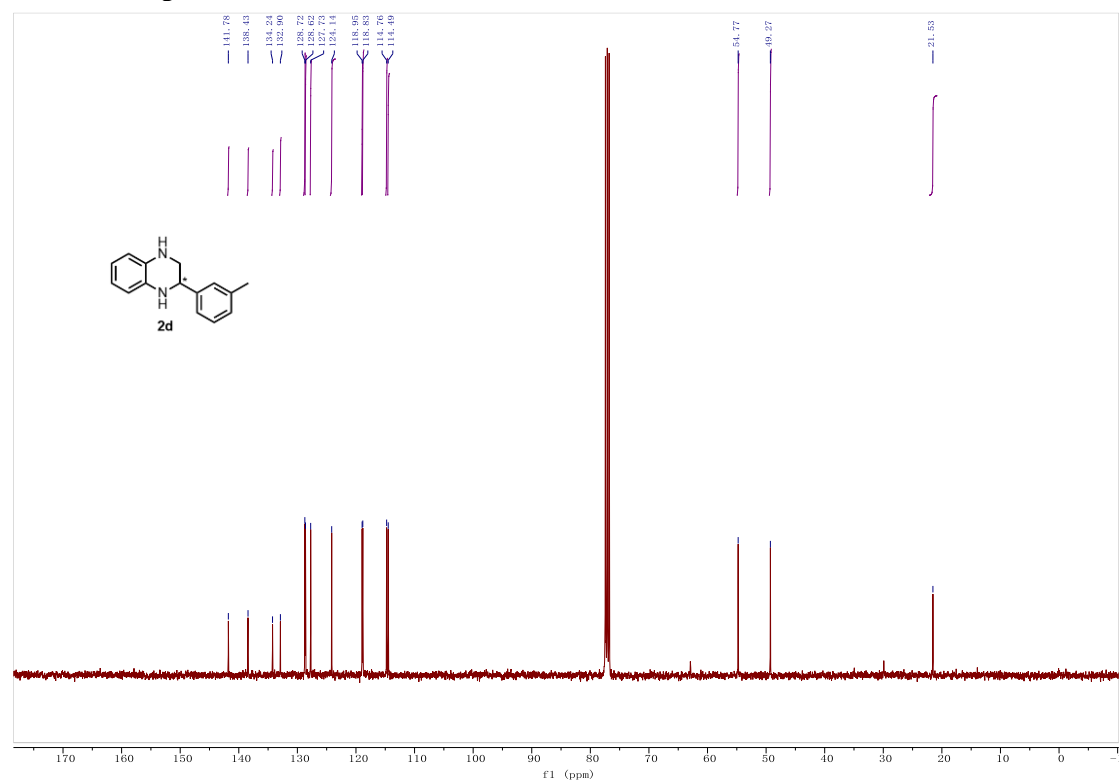

## <sup>1</sup>H NMR spectra for 2e

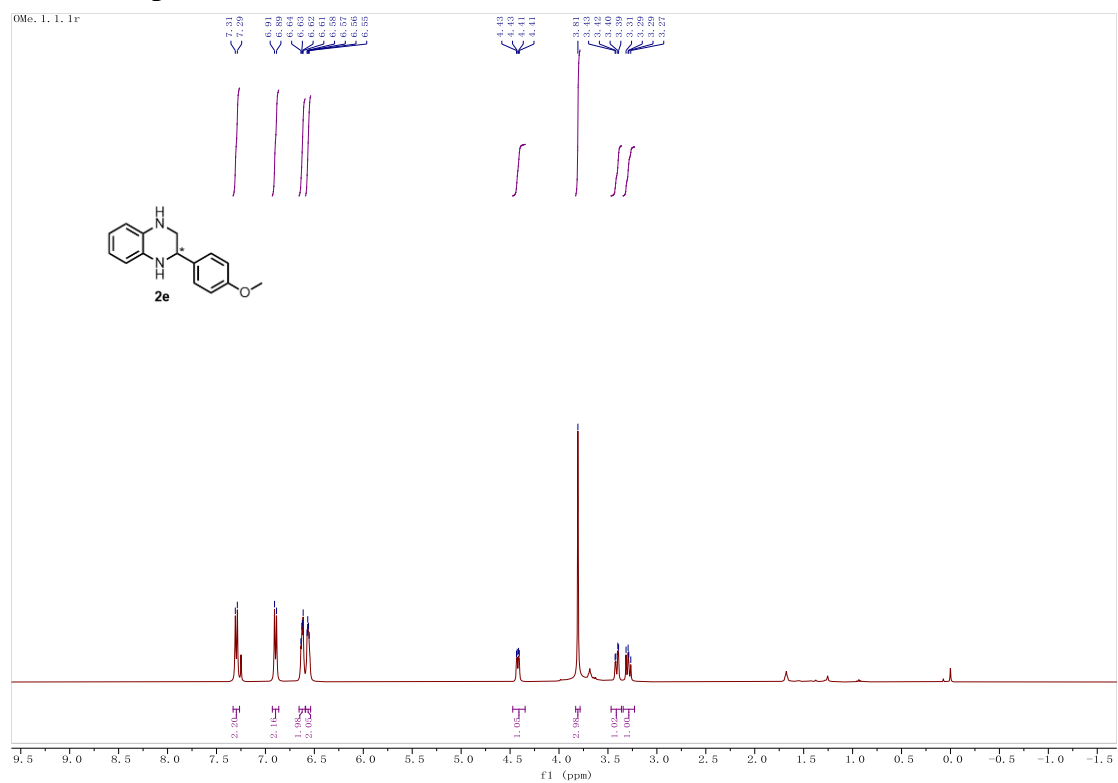

## <sup>13</sup>C NMR spectra for 2e

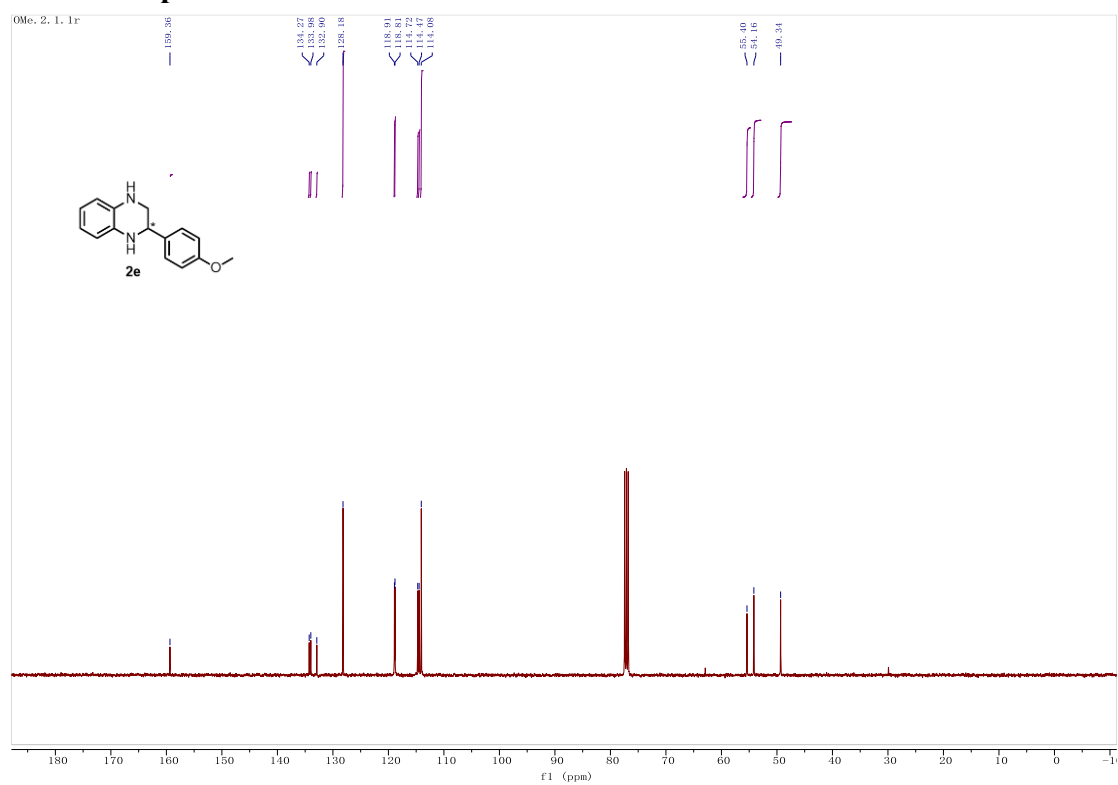

### <sup>1</sup>H NMR spectra for 2f

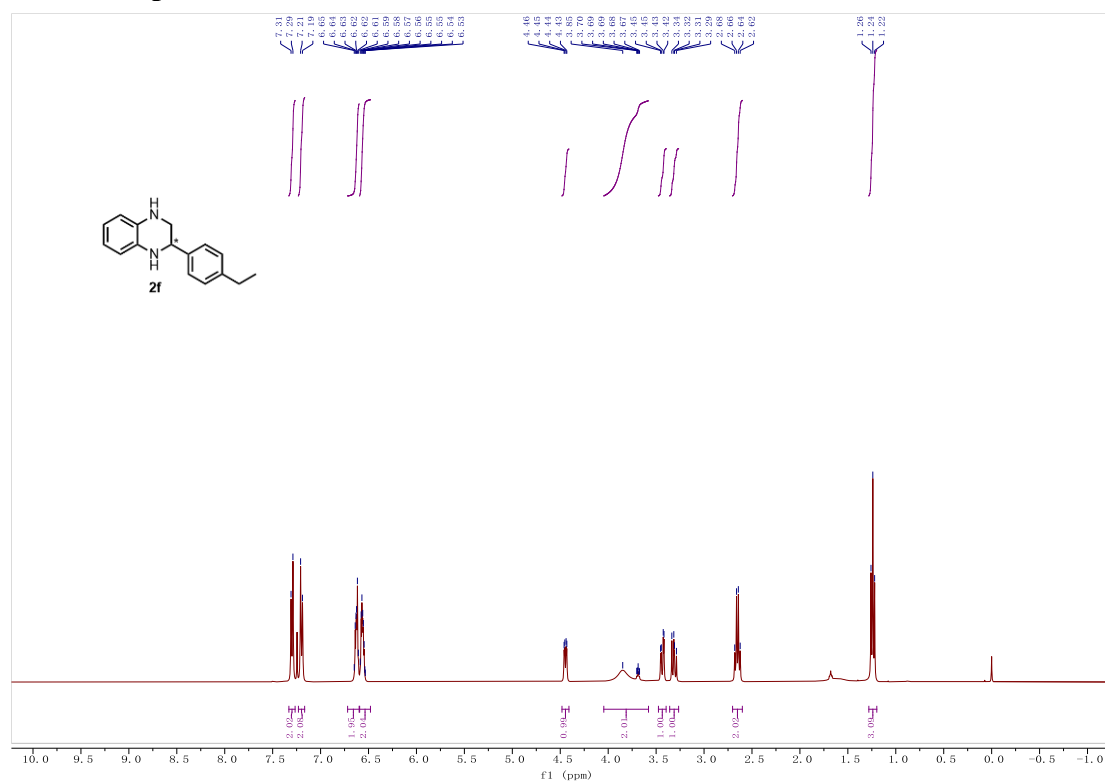

### <sup>13</sup>C NMR spectra for 2f

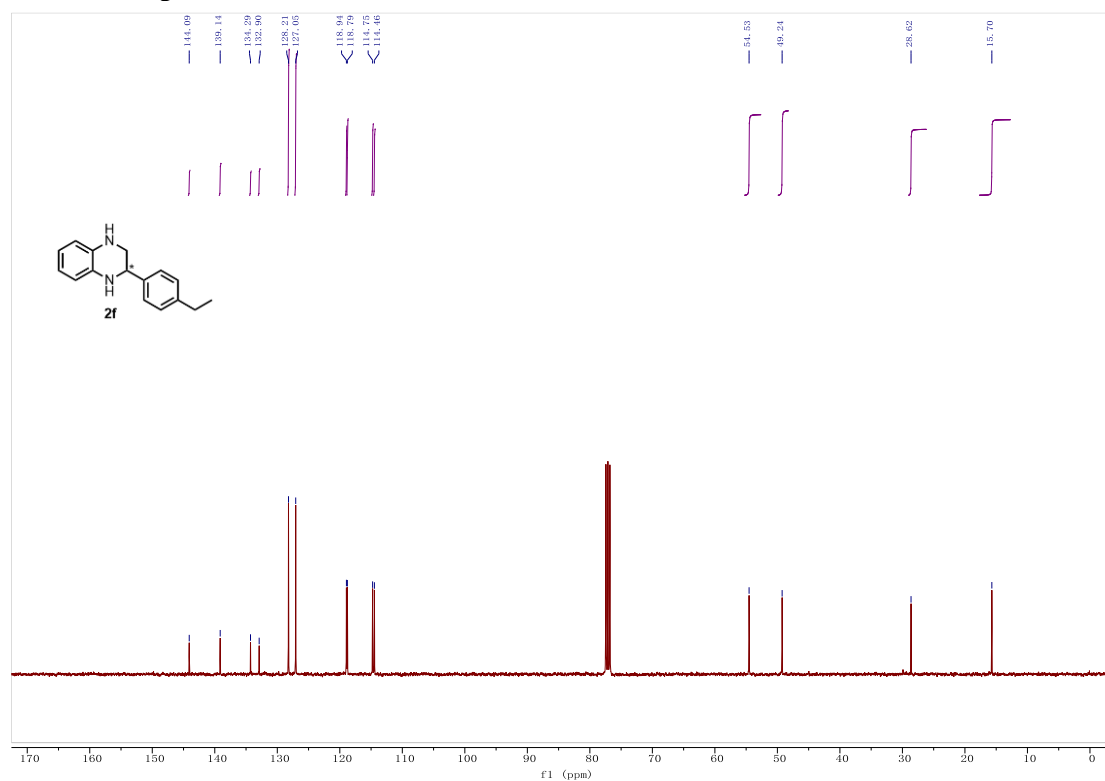

### <sup>1</sup>H NMR spectra for 2g

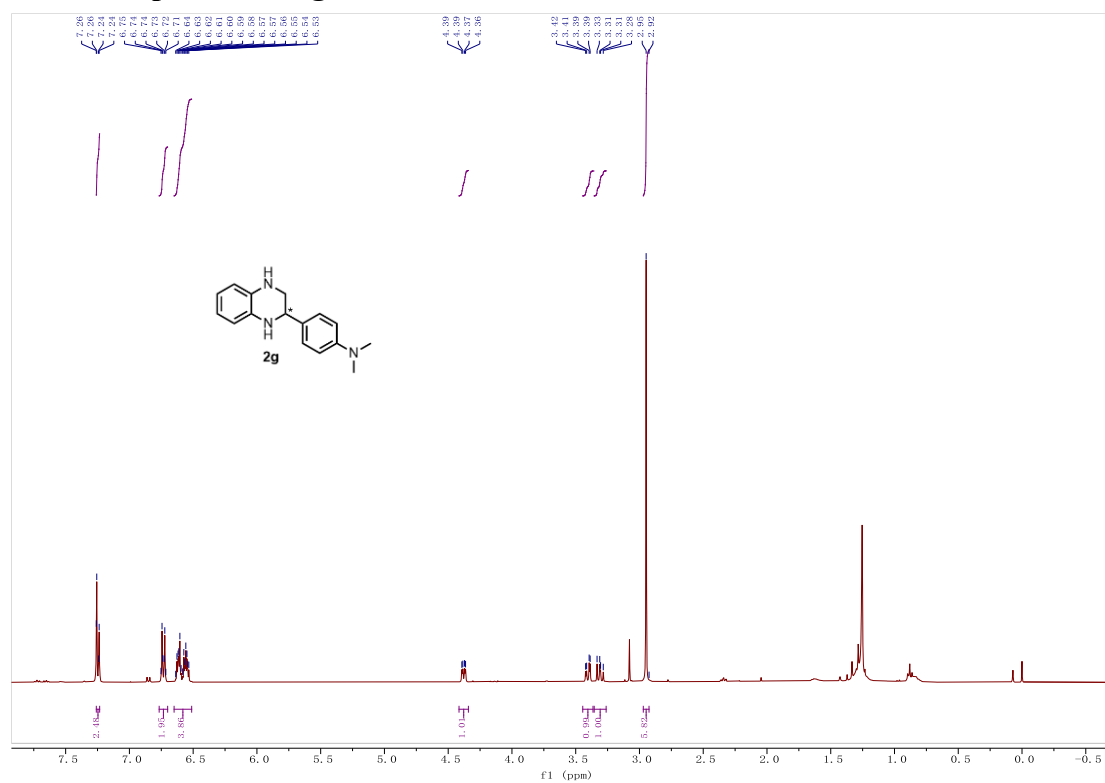

### <sup>13</sup>C NMR spectra for 2g

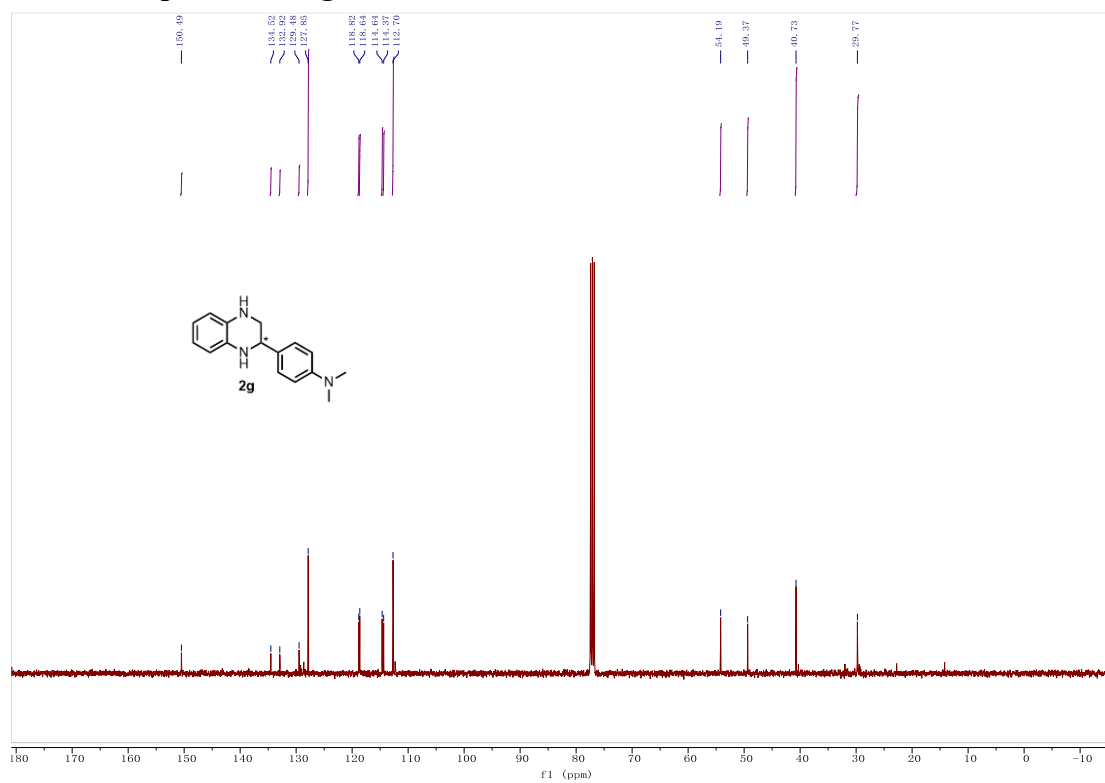

### <sup>1</sup>H NMR spectra for 2h

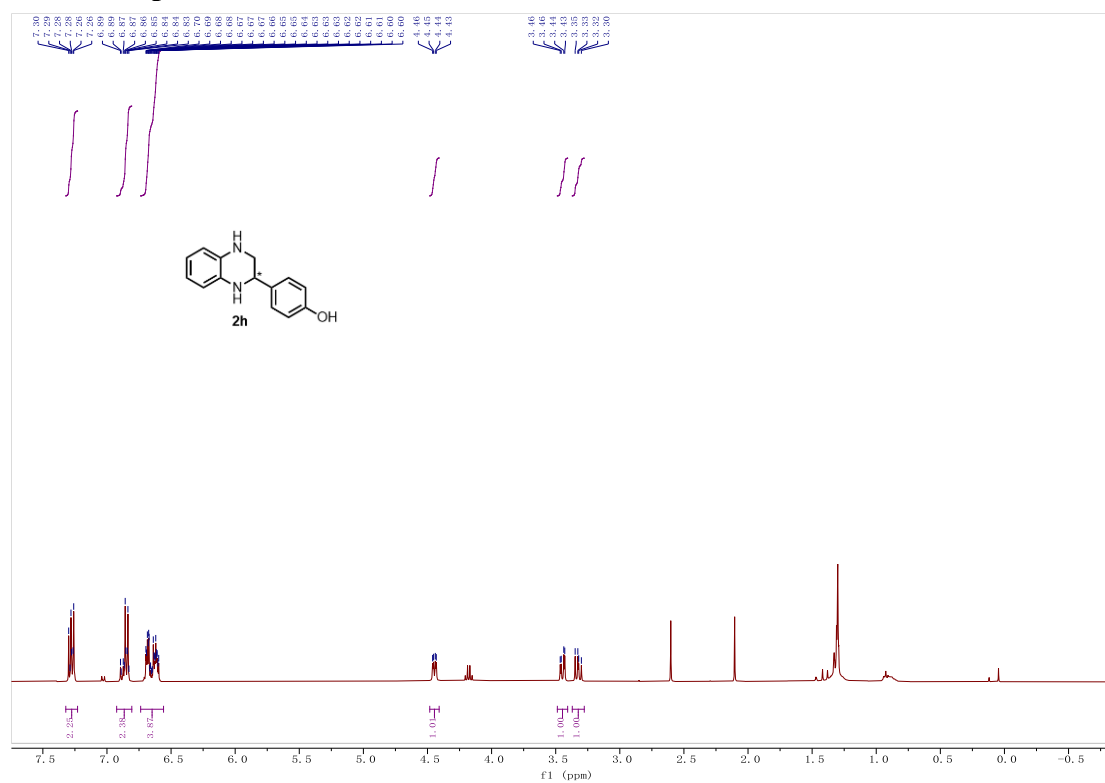

### <sup>13</sup>C NMR spectra for 2h

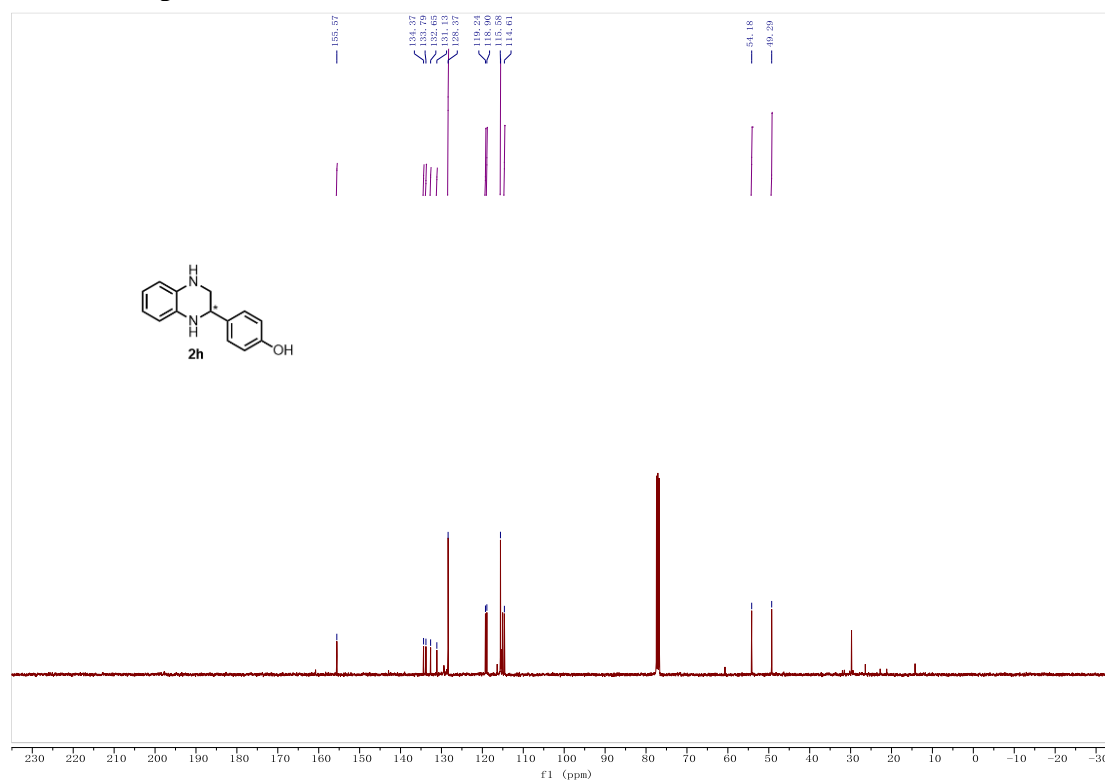



### <sup>1</sup>H NMR spectra for 2i

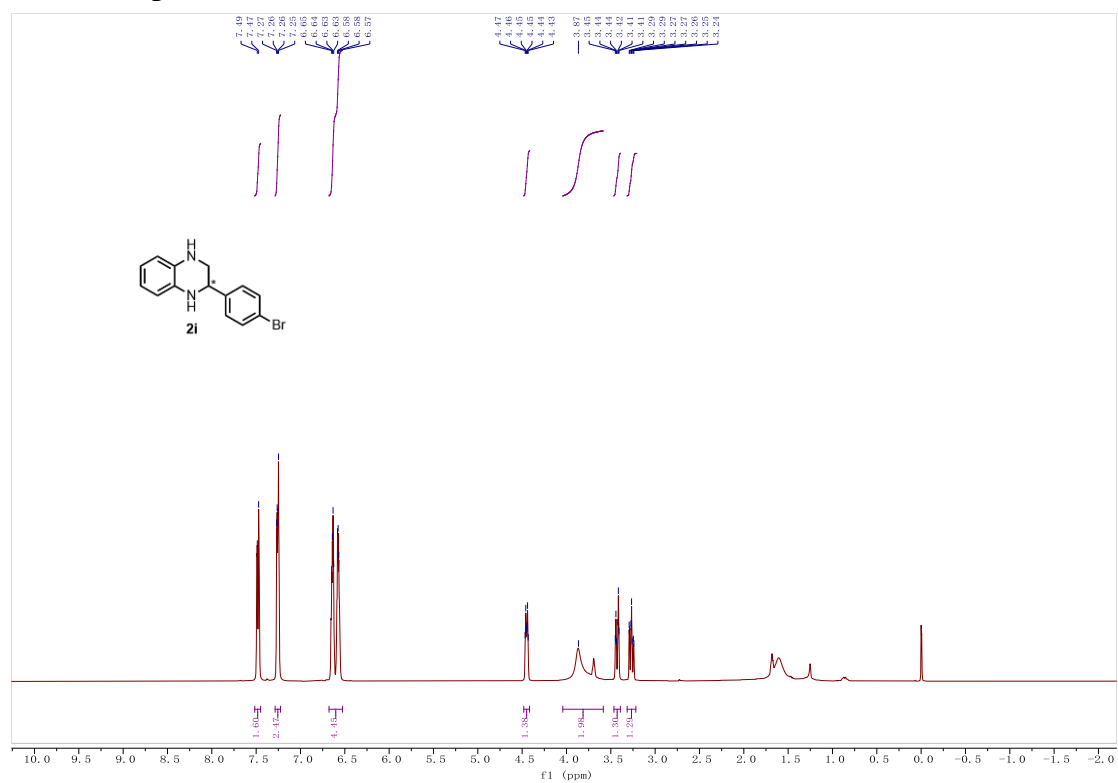

### <sup>13</sup>C NMR spectra for 2i

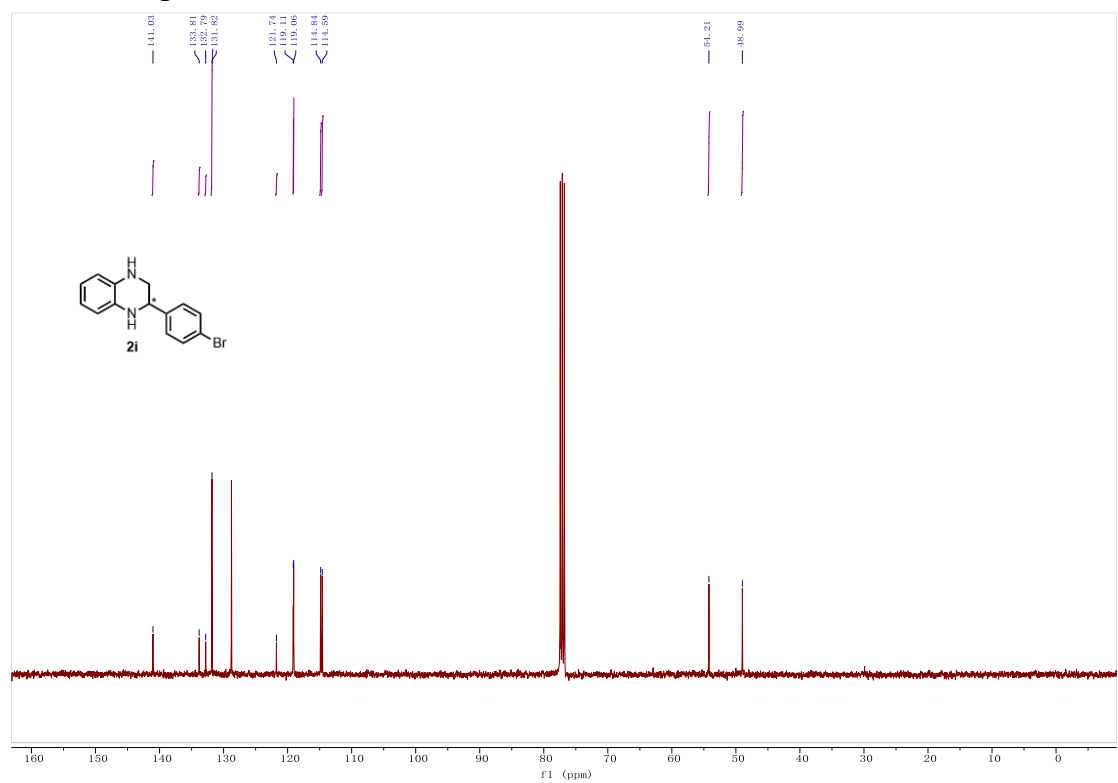

## <sup>1</sup>H NMR spectra for 2j

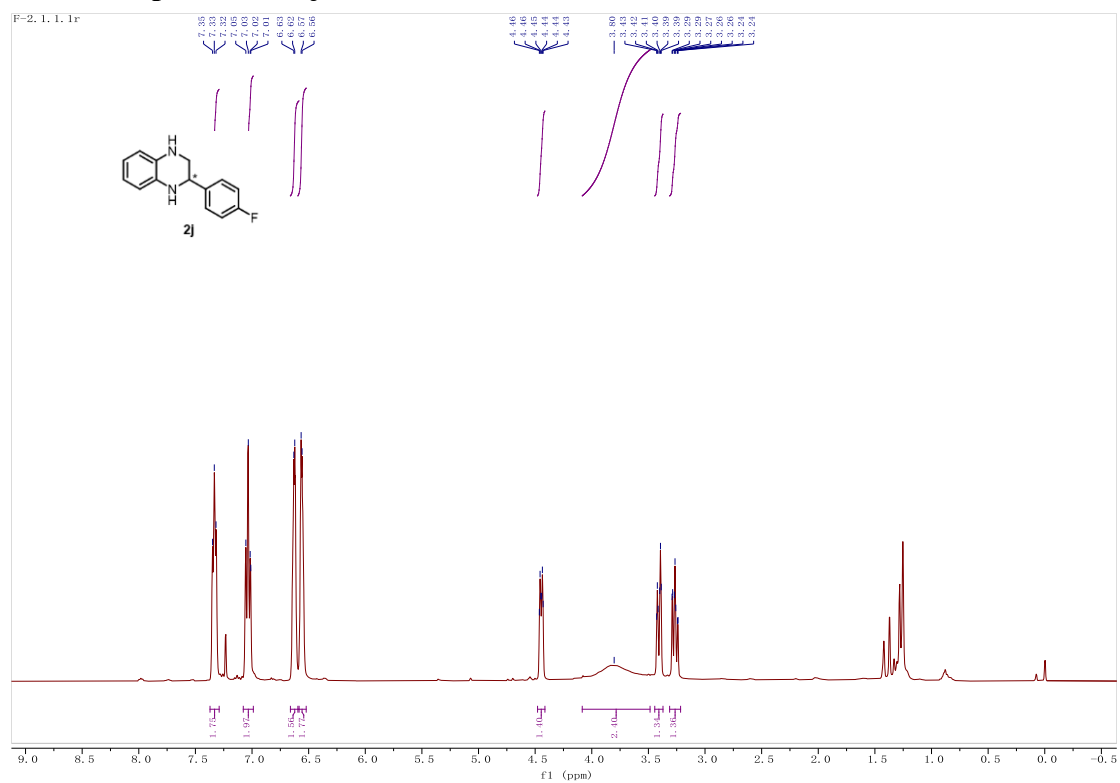

## <sup>13</sup>C NMR spectra for 2j

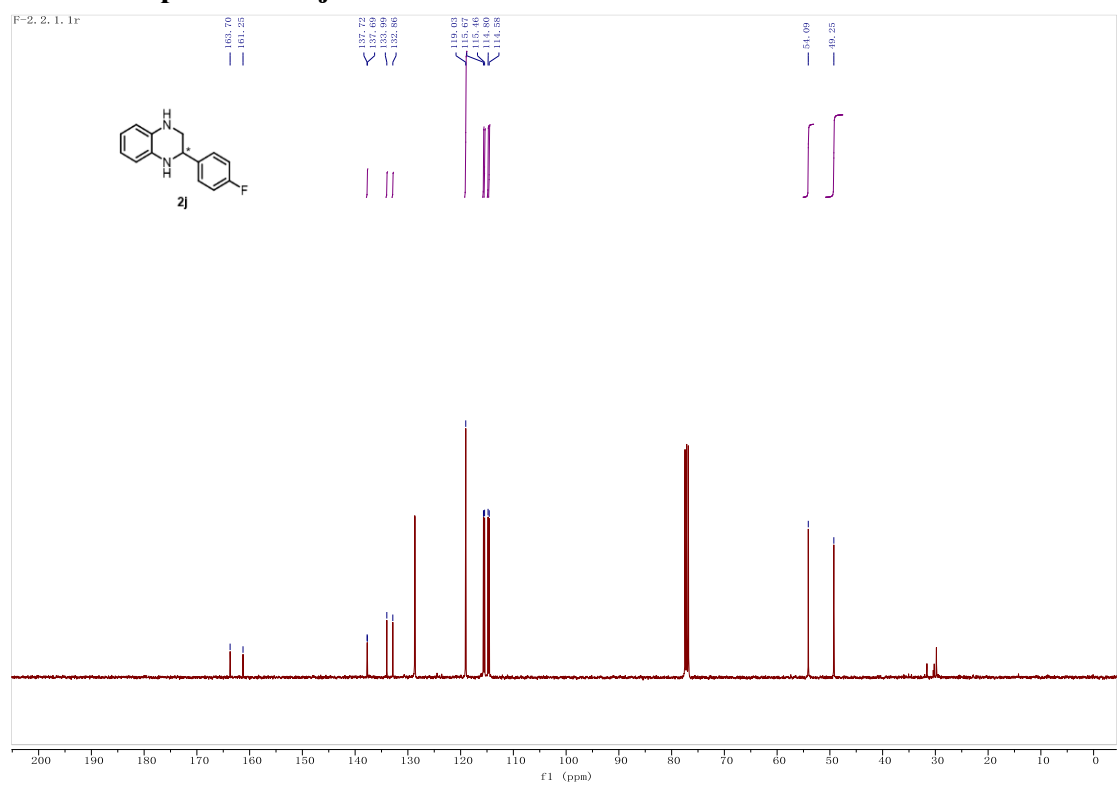

### <sup>1</sup>H NMR spectra for 2k

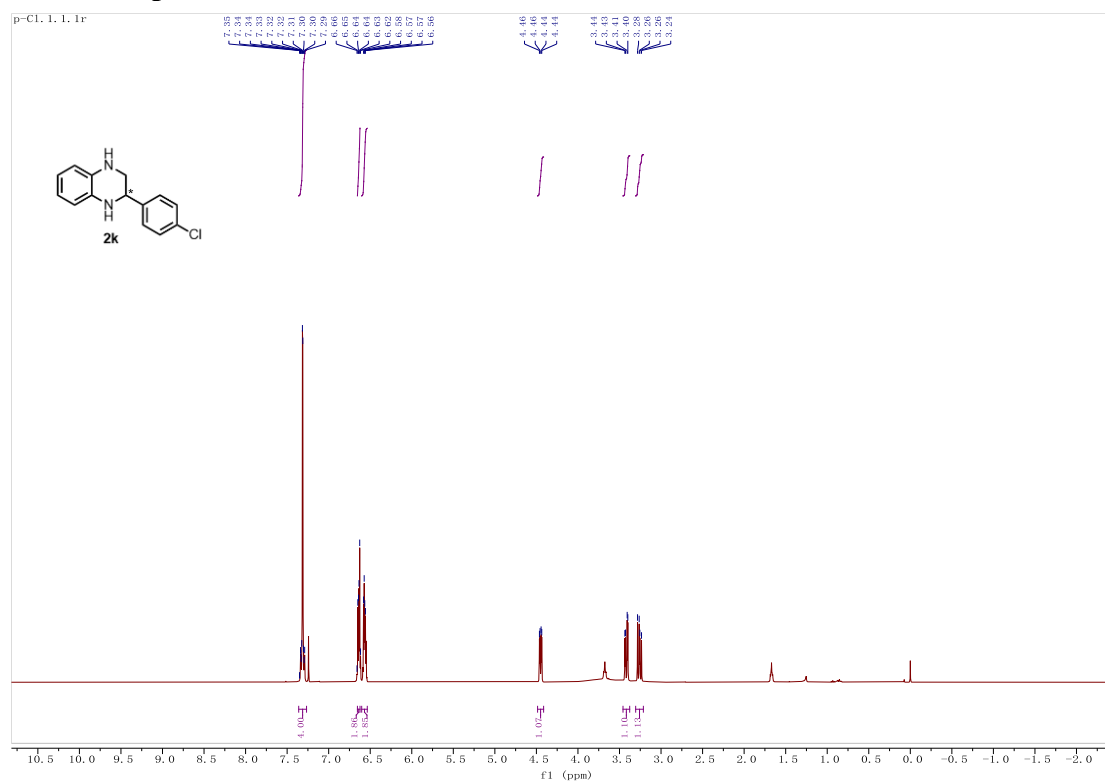

### <sup>13</sup>C NMR spectra for 2k

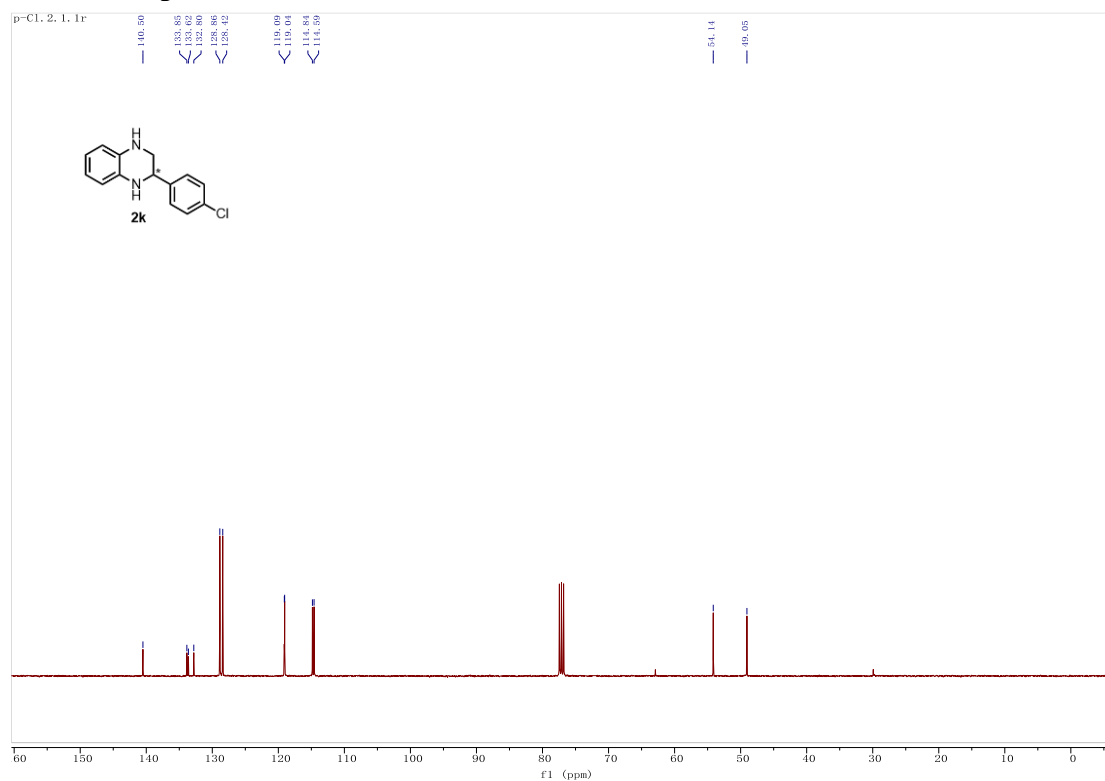

# <sup>1</sup>H NMR spectra for 2l

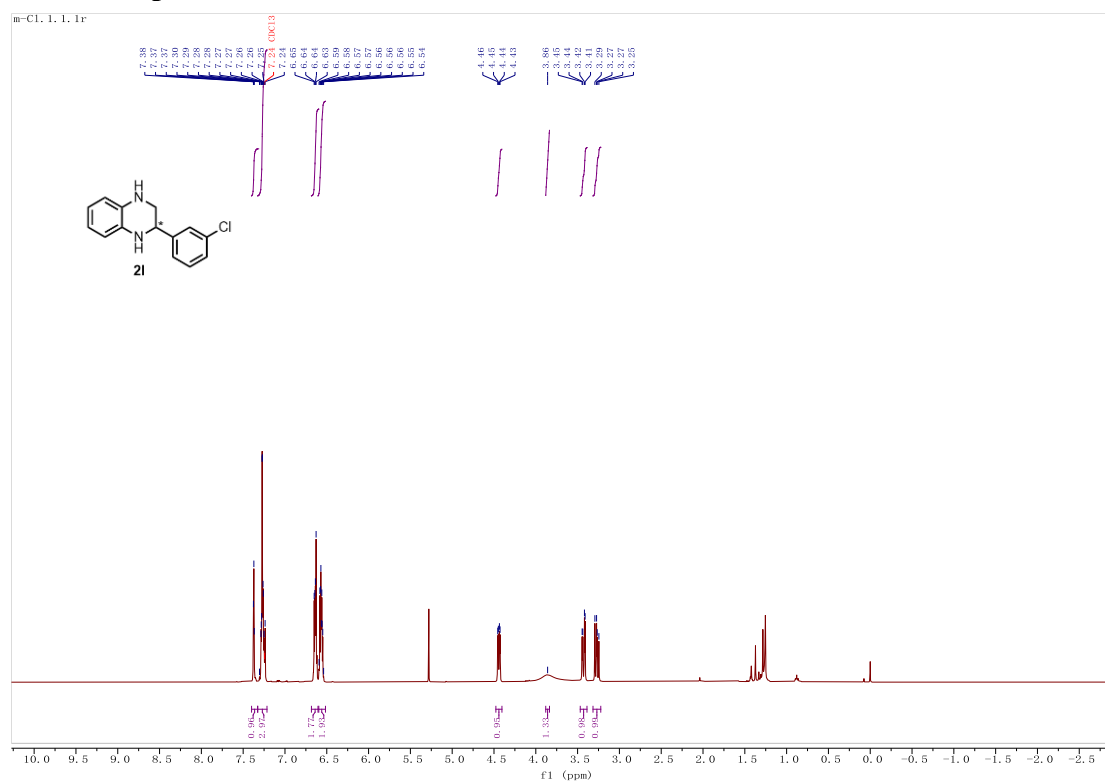

# <sup>13</sup>C NMR spectra for 2l

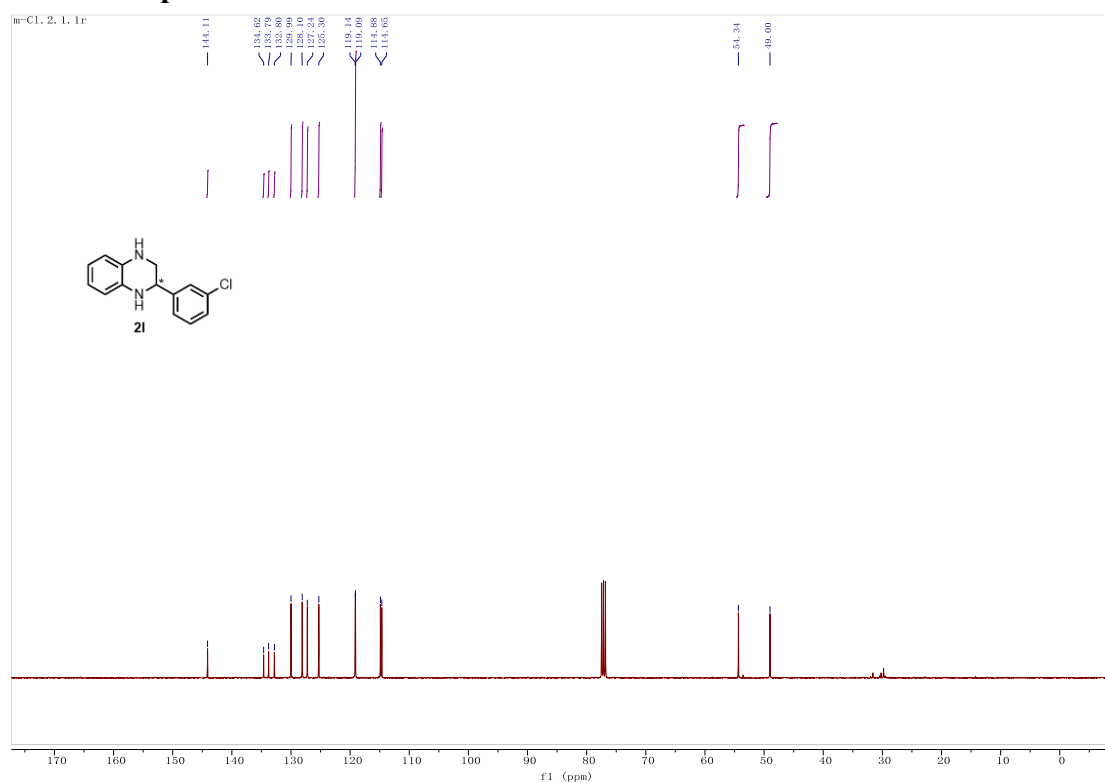

### <sup>1</sup>H NMR spectra for 2m

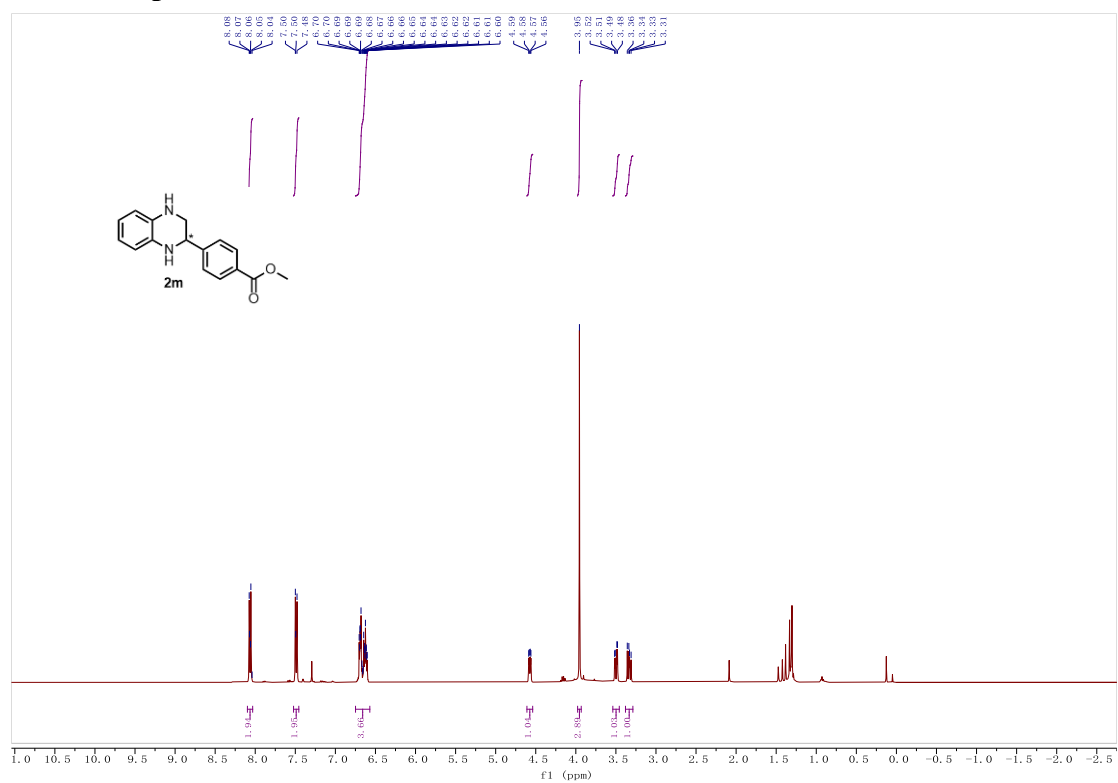

### <sup>13</sup>C NMR spectra for 2m

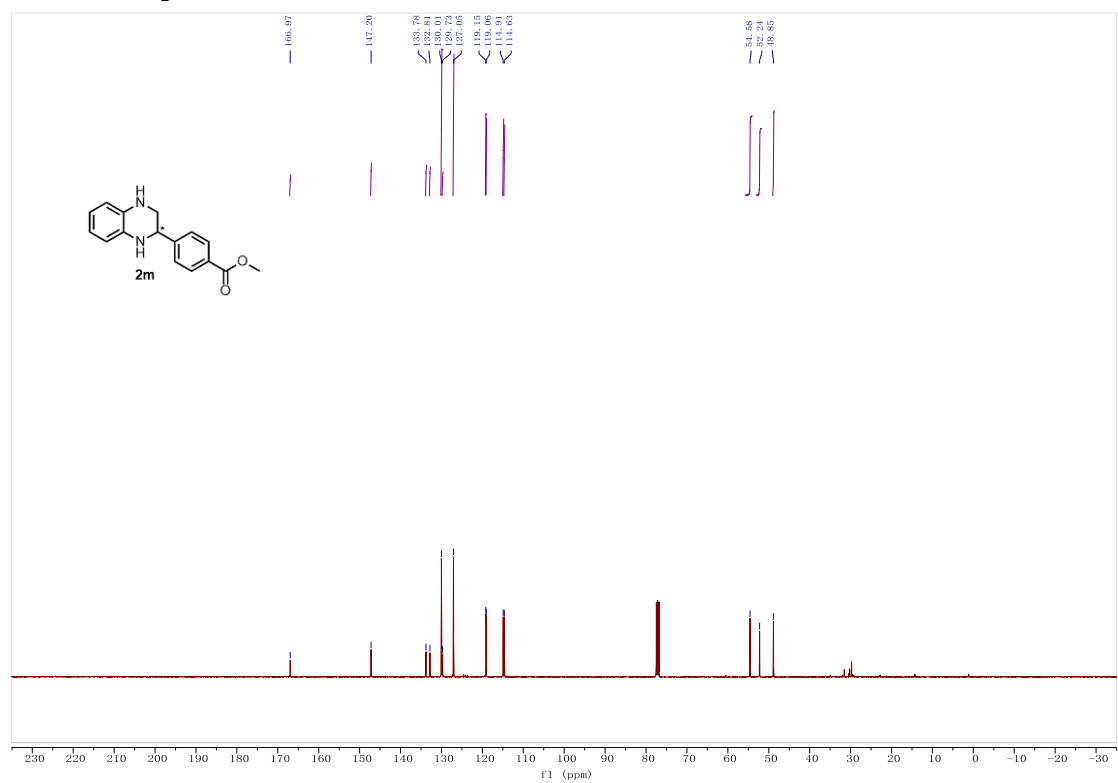

## <sup>1</sup>H NMR spectra for 2n

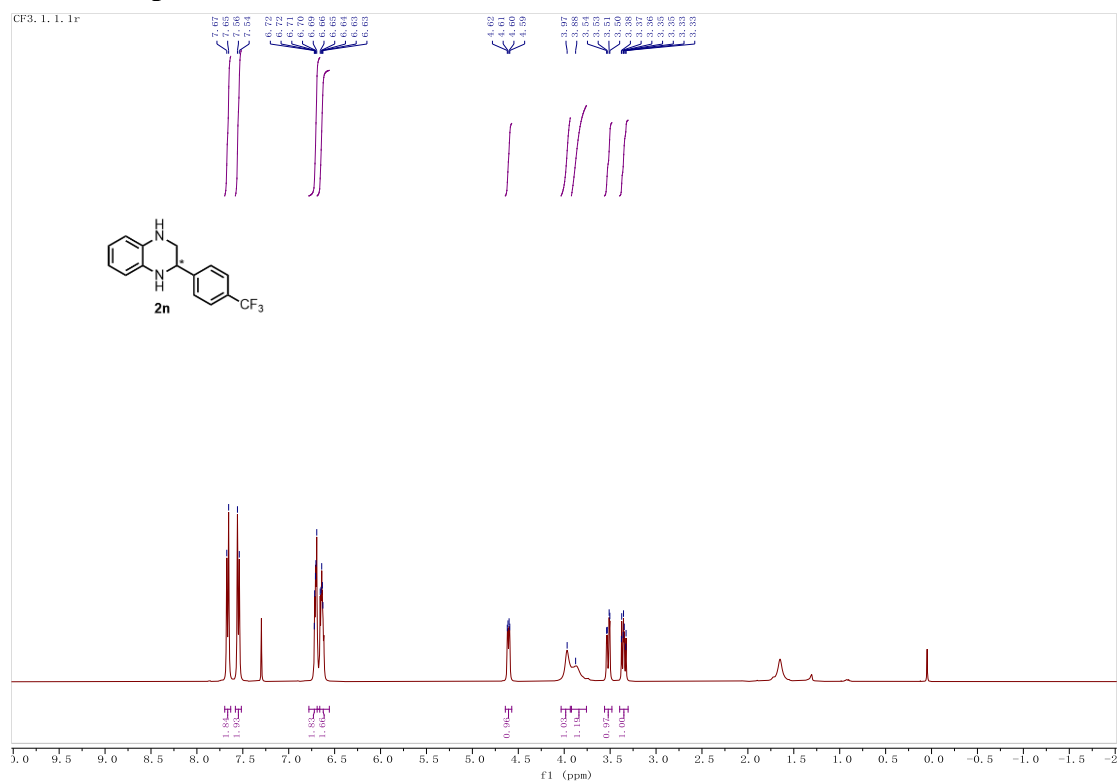

## <sup>13</sup>C NMR spectra for 2n

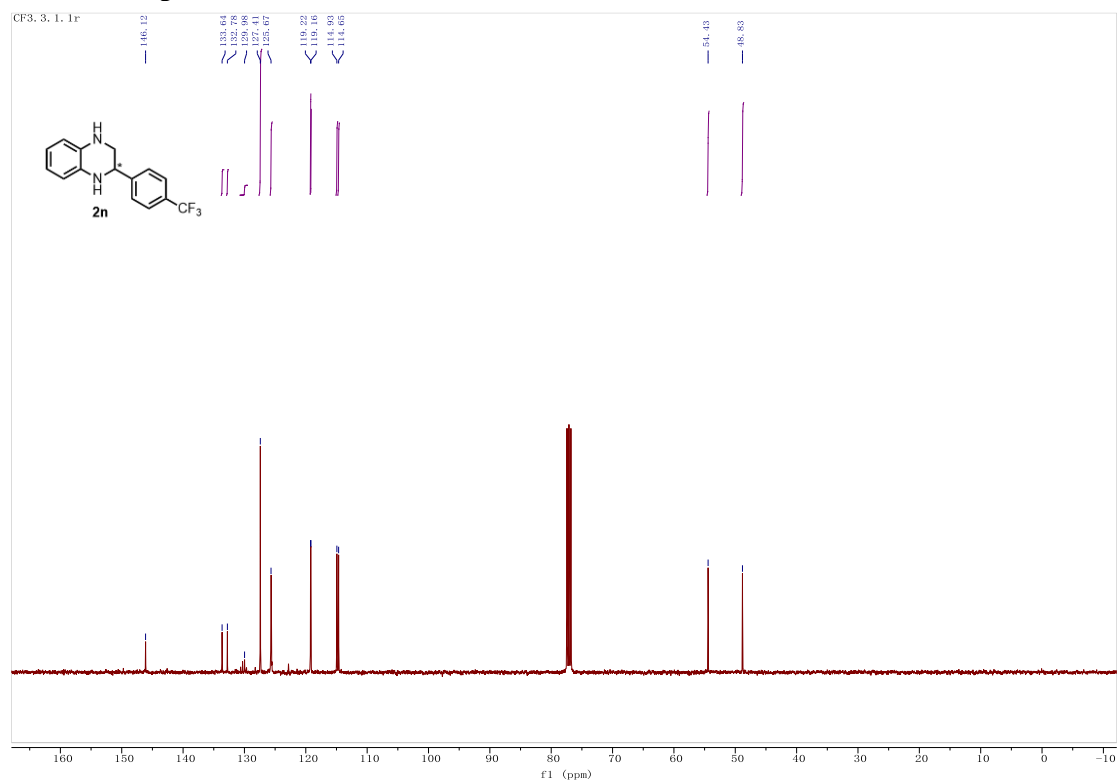

## $^1\text{H}$ NMR spectra for 2o

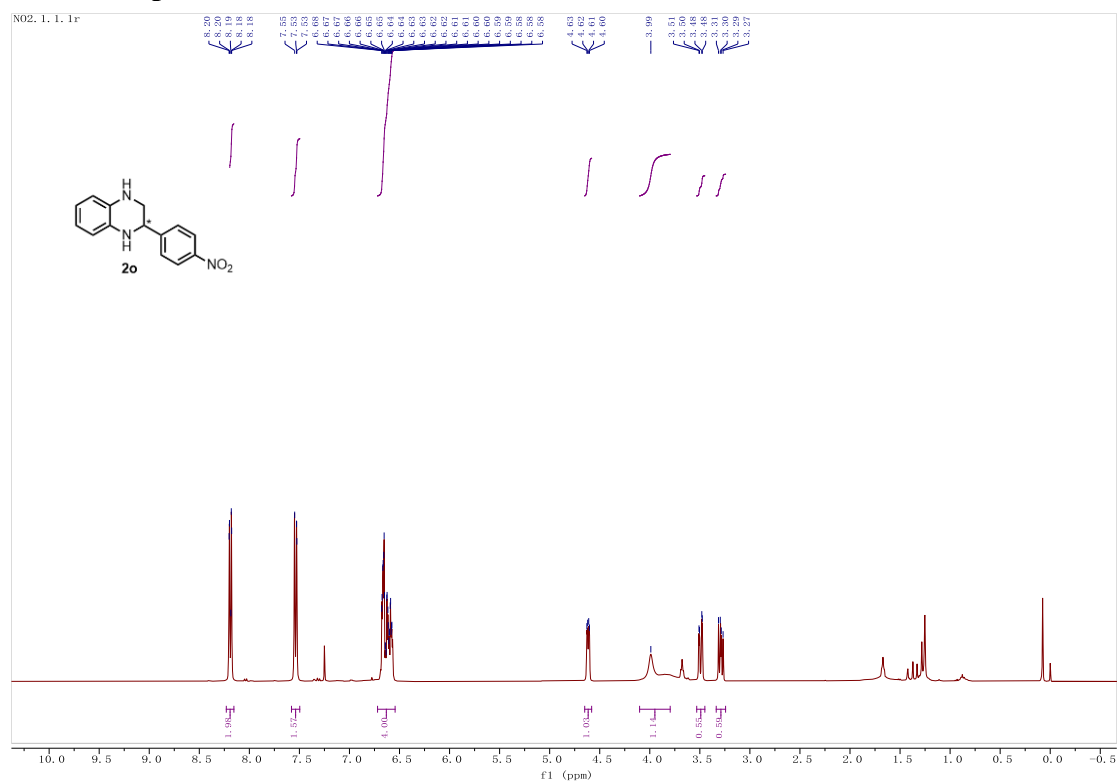

## $^{13}\text{C}$ NMR spectra for 2o

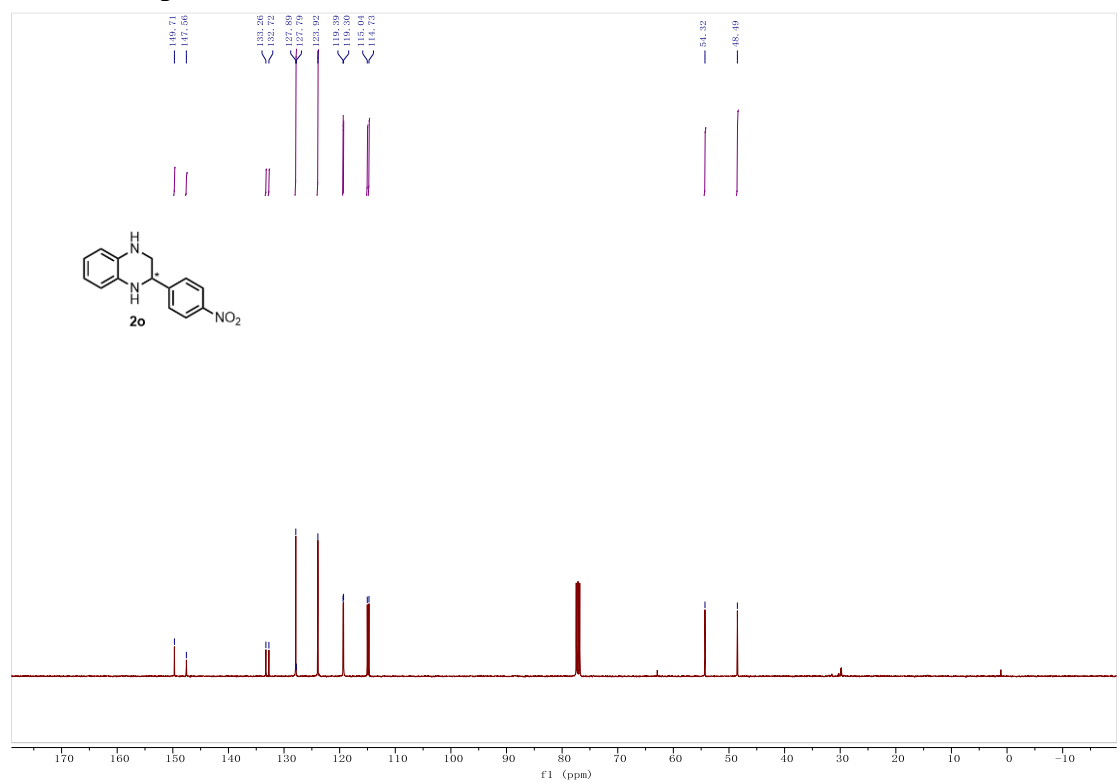

### <sup>1</sup>H NMR spectra for 2p

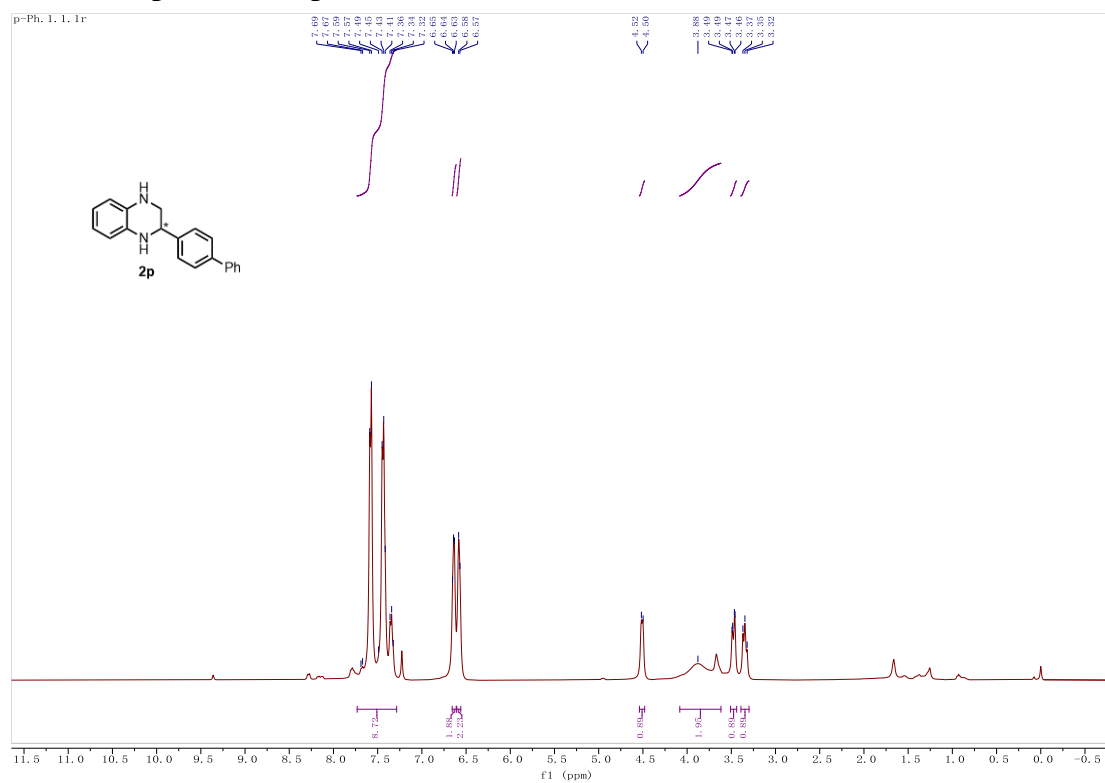

### <sup>13</sup>C NMR spectra for 2p

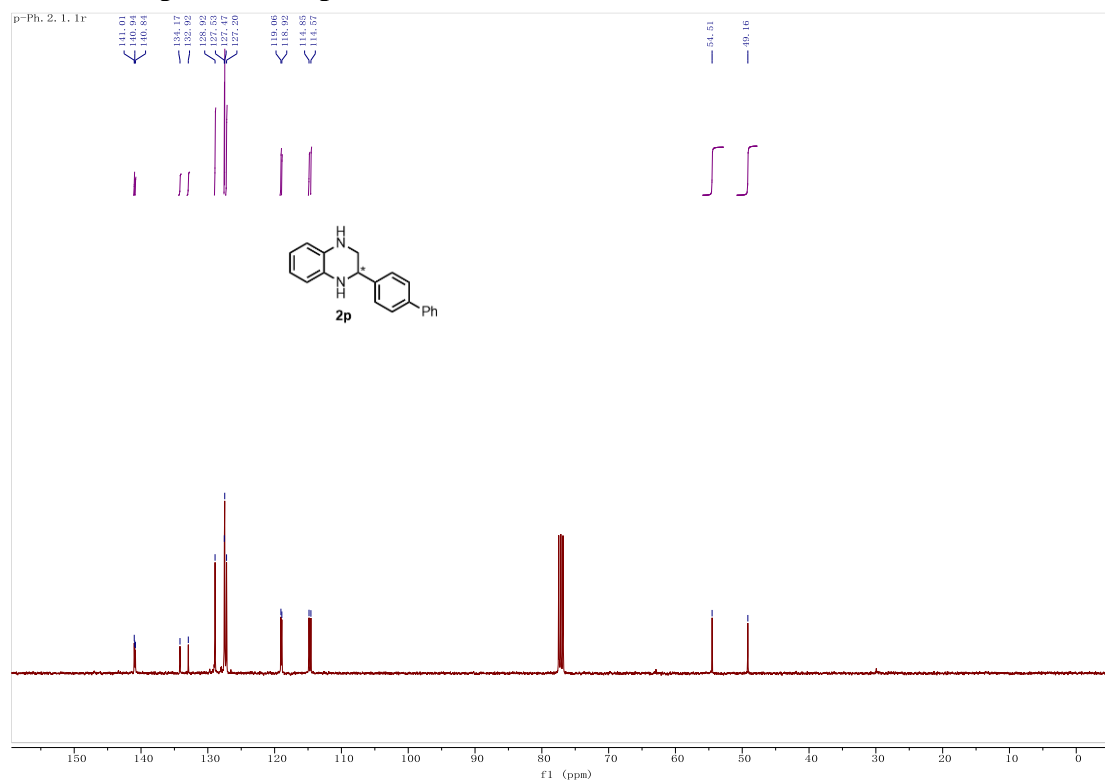



### <sup>1</sup>H NMR spectra for 2q

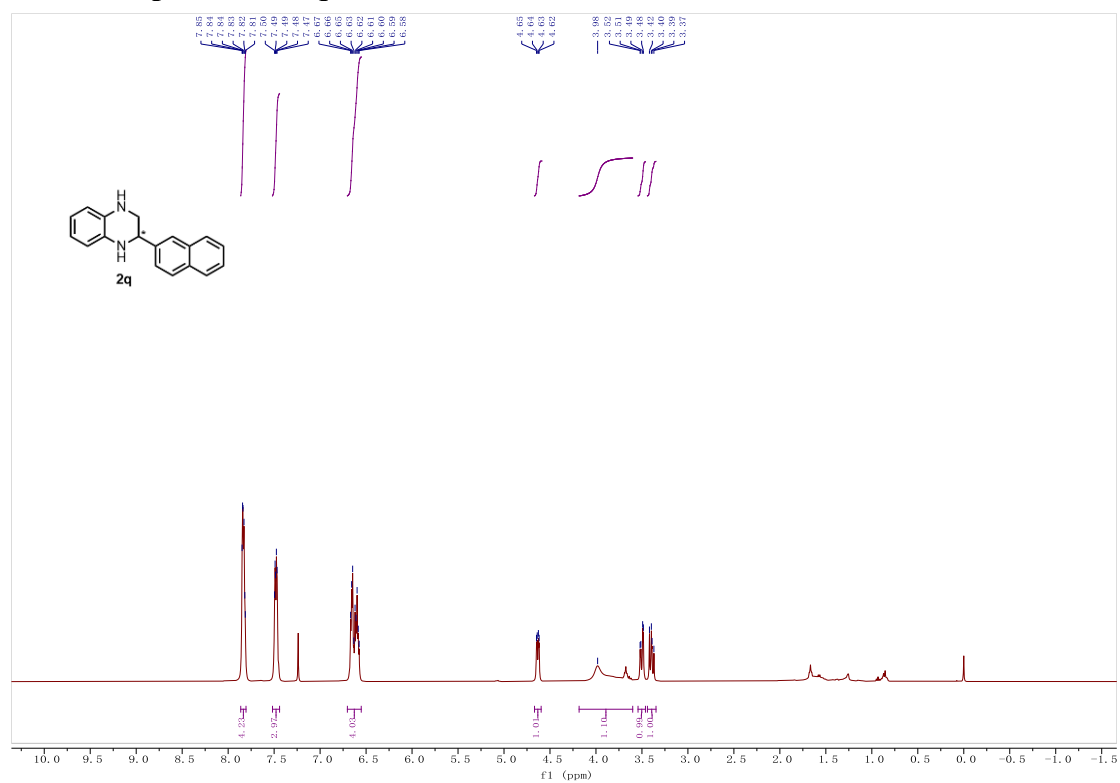

### <sup>13</sup>C NMR spectra for 2q

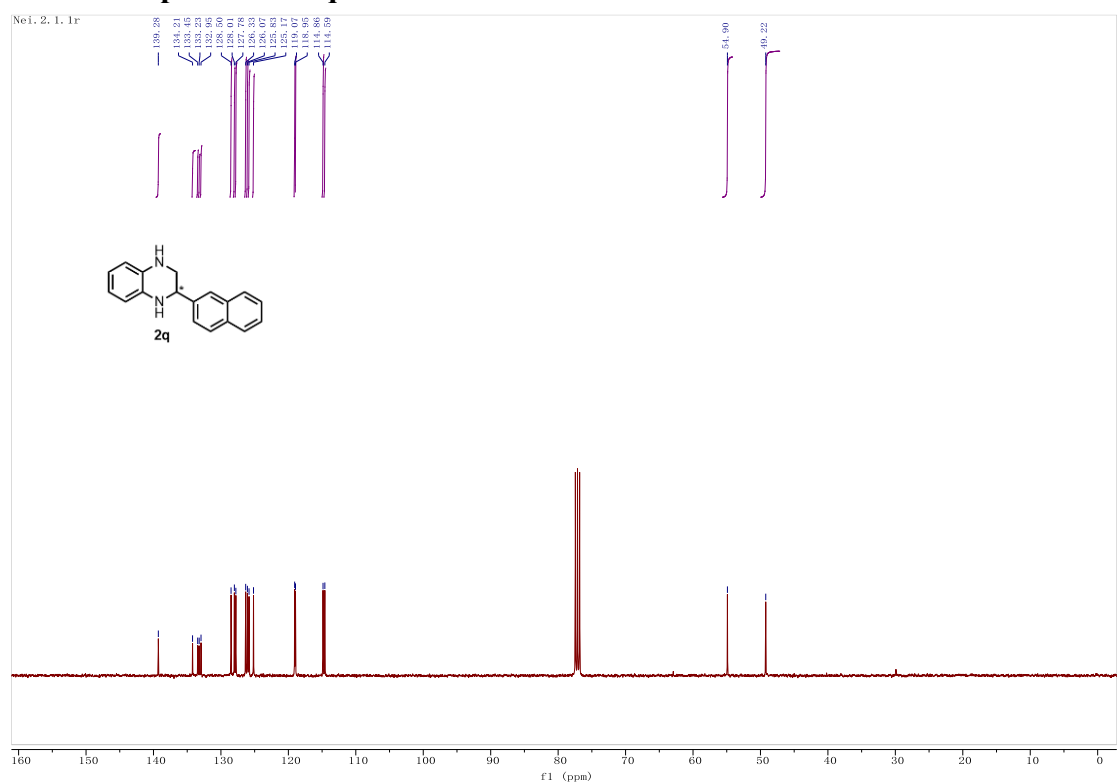

### <sup>1</sup>H NMR spectra for 2r

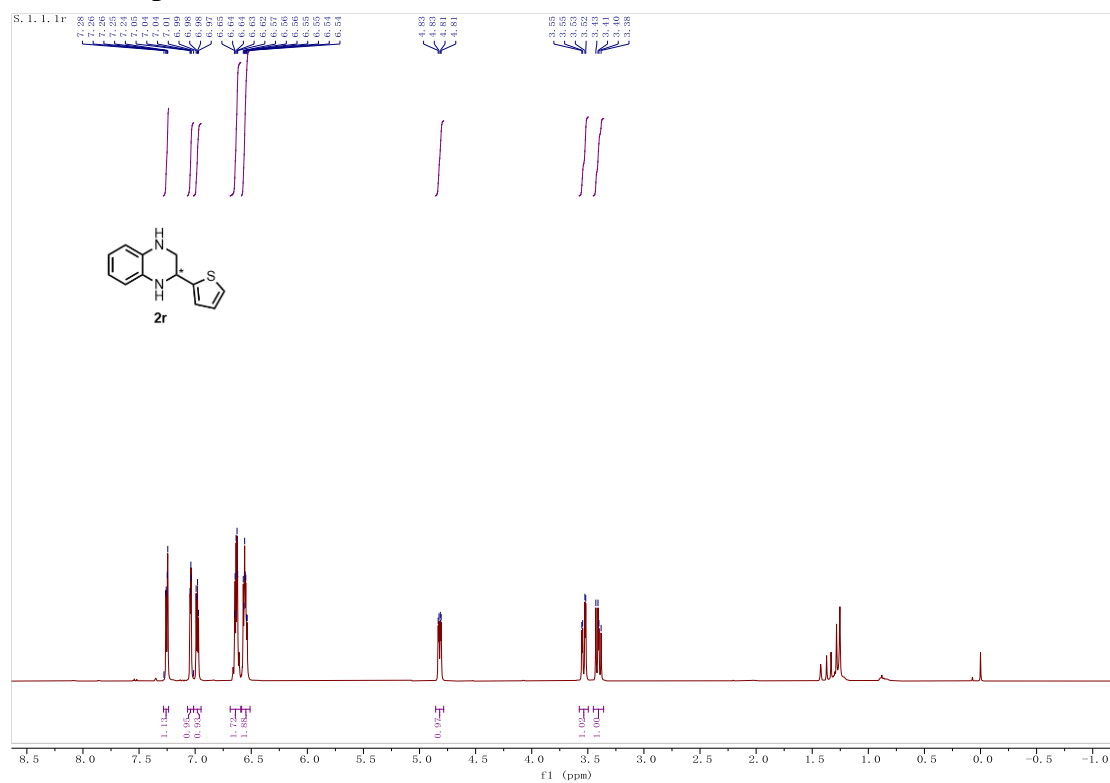

### <sup>13</sup>C NMR spectra for 2r

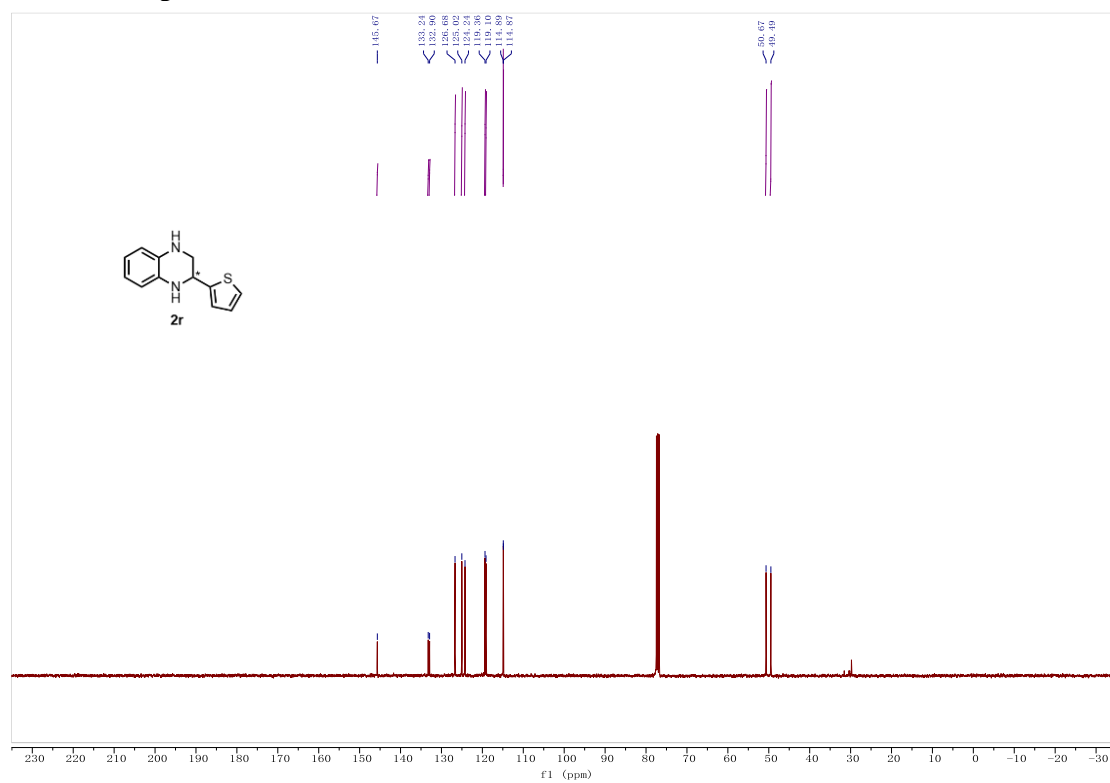

# <sup>1</sup>H NMR spectra for 2s

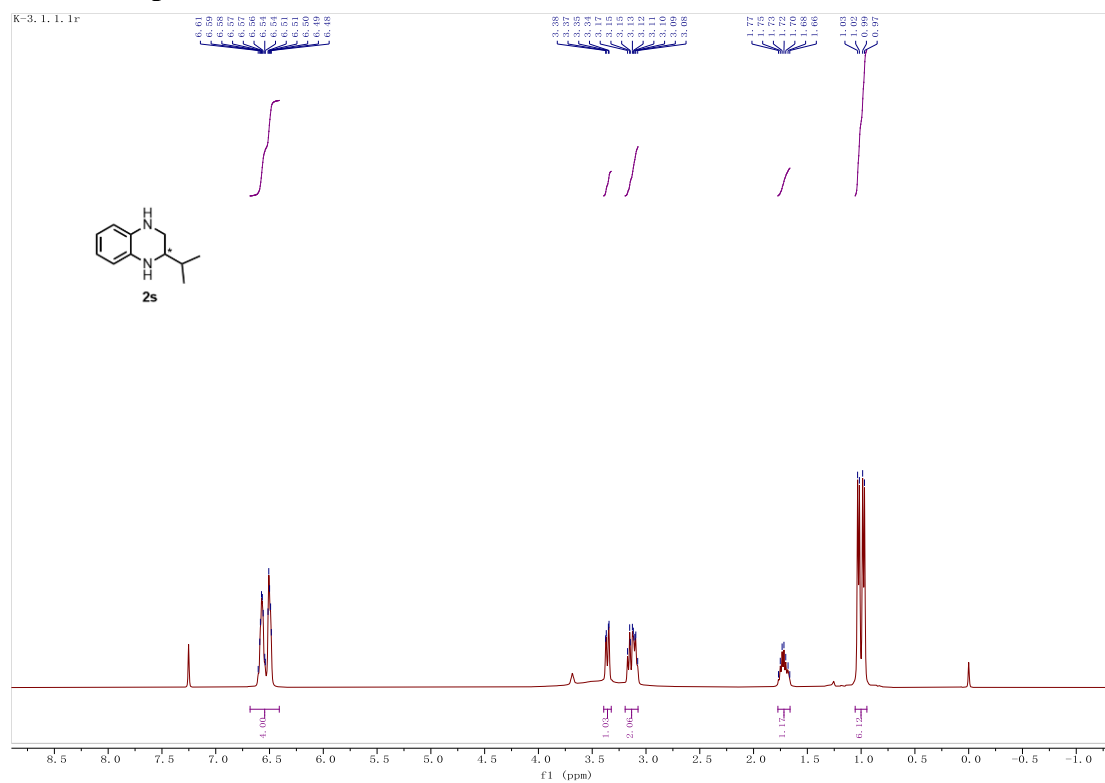

# <sup>13</sup>C NMR spectra for 2s

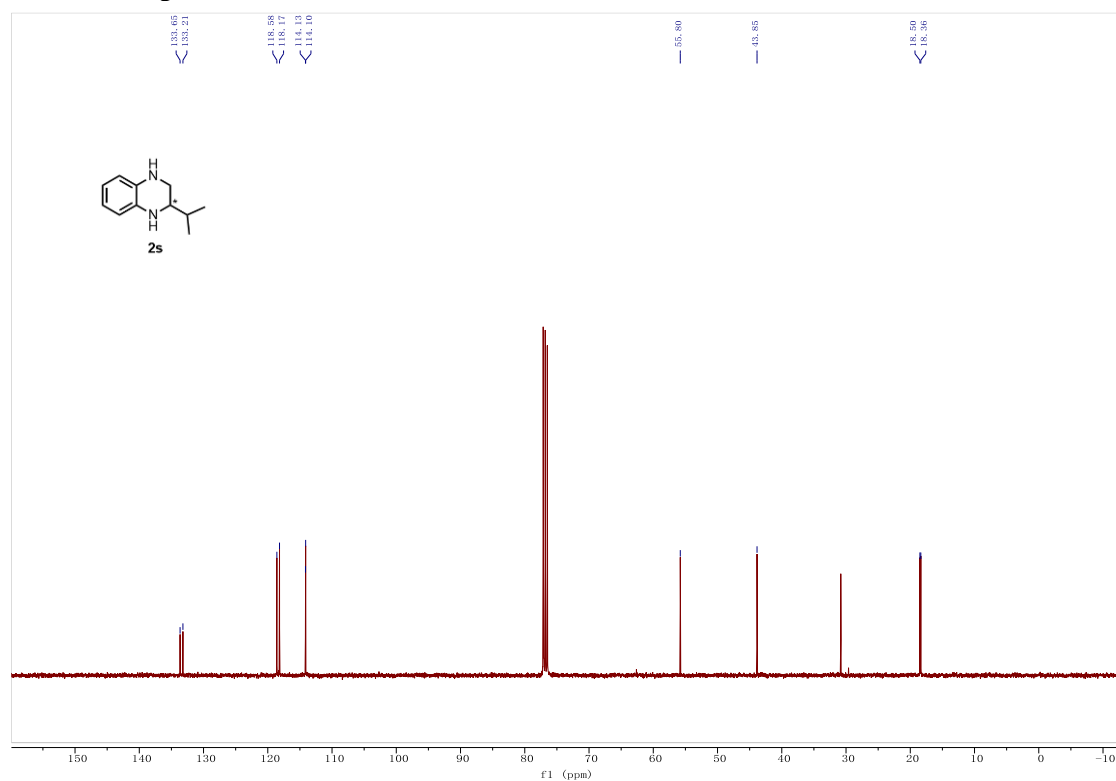

### <sup>1</sup>H NMR spectra for 2t

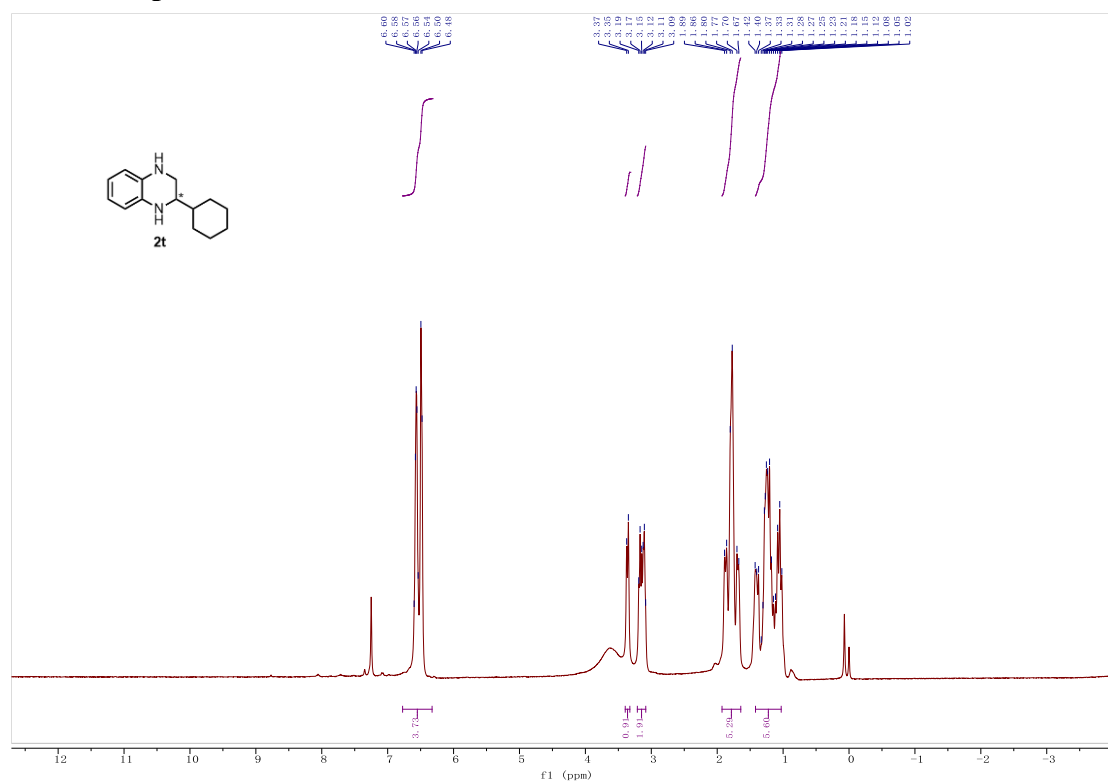

### <sup>13</sup>C NMR spectra for 2t

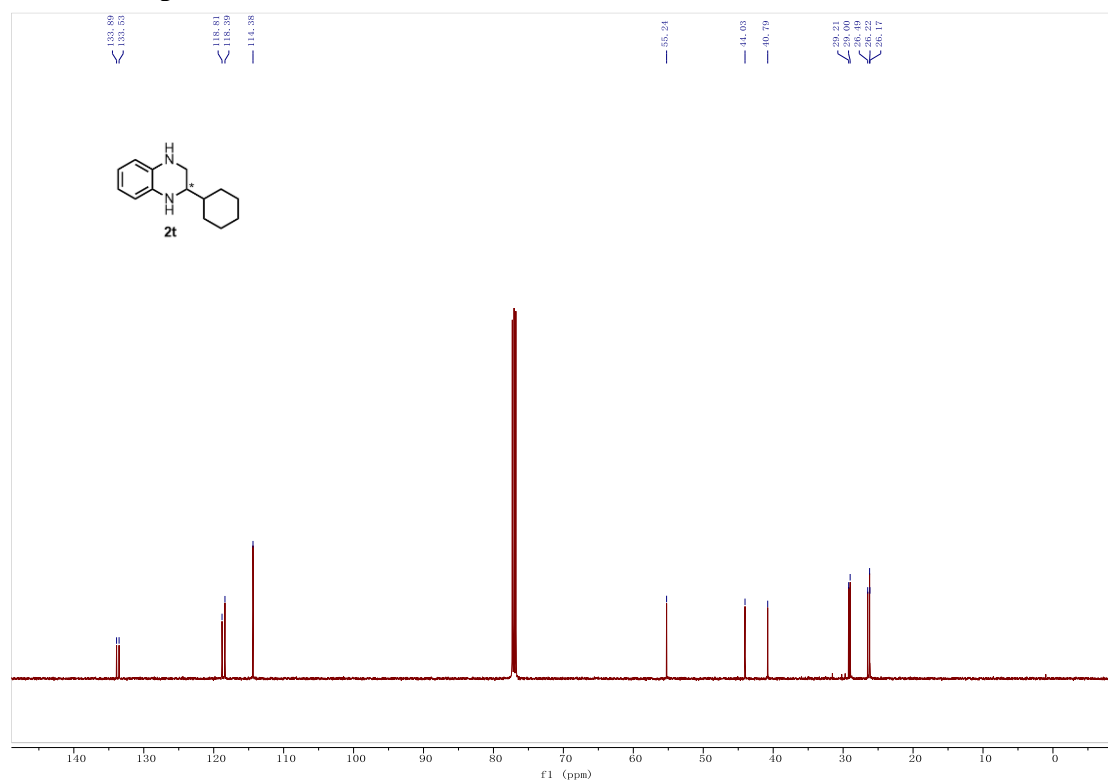

### <sup>1</sup>H NMR spectra for 2u

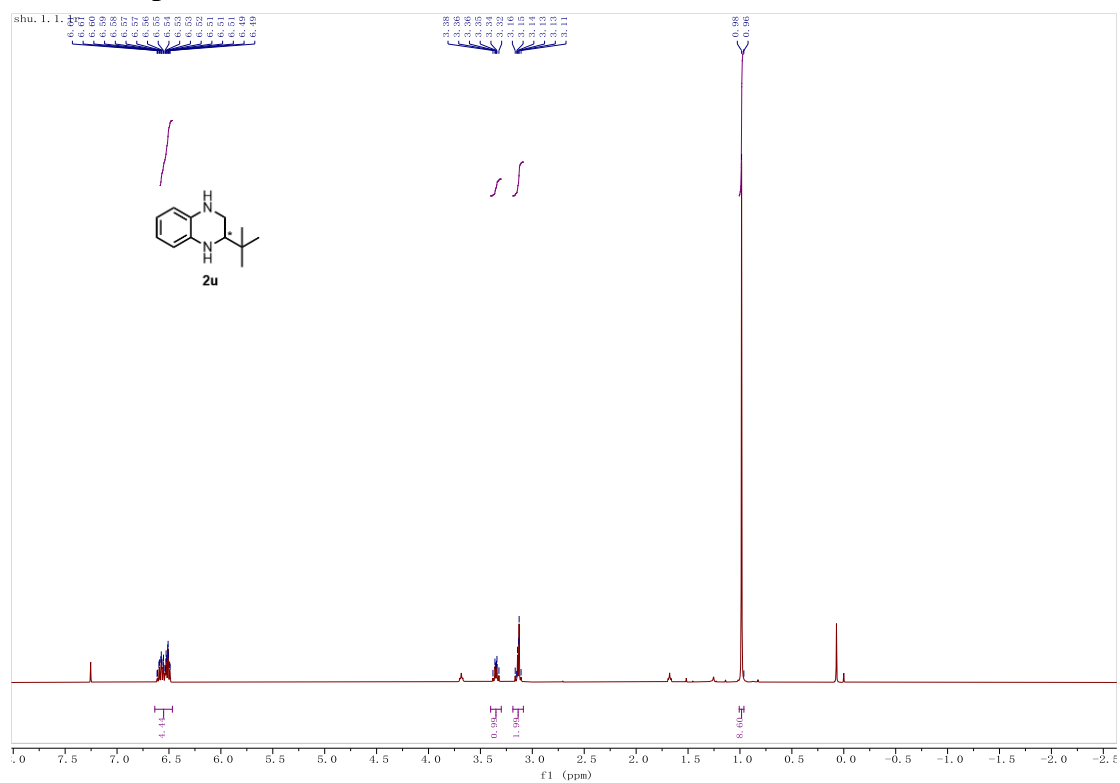

### <sup>13</sup>C NMR spectra for 2u

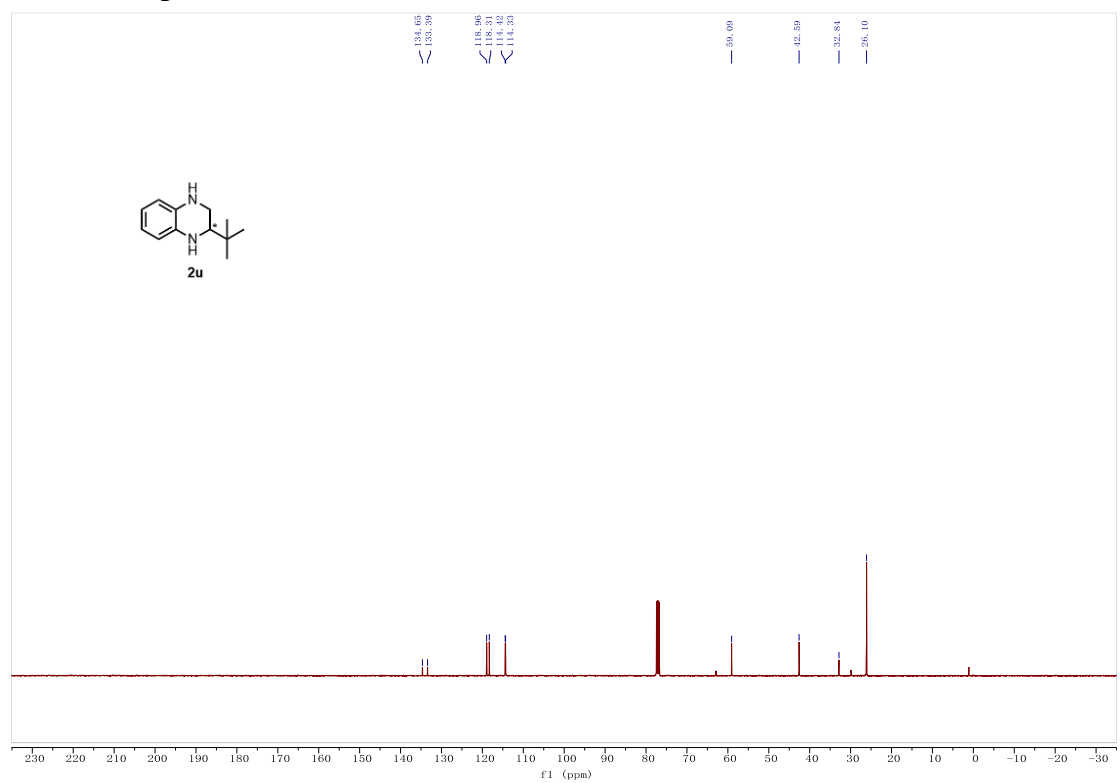

### <sup>1</sup>H NMR spectra for 2v

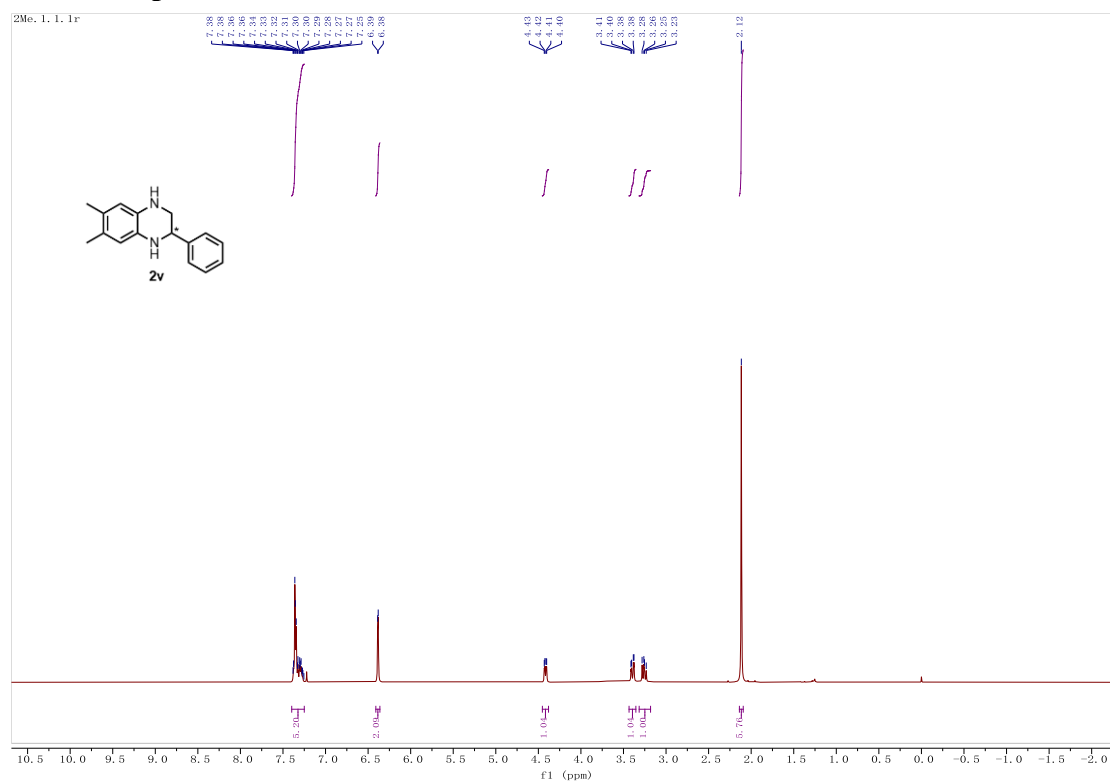

### <sup>13</sup>C NMR spectra for 2v

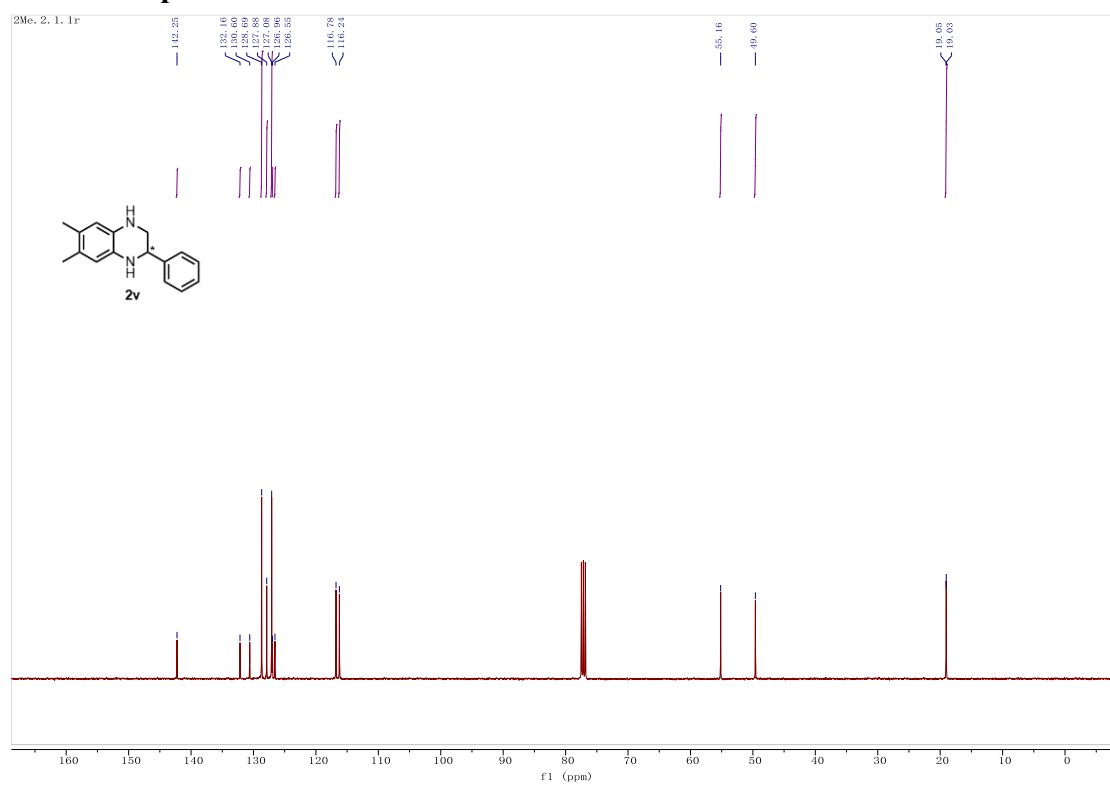

# <sup>1</sup>H NMR spectra for 2w

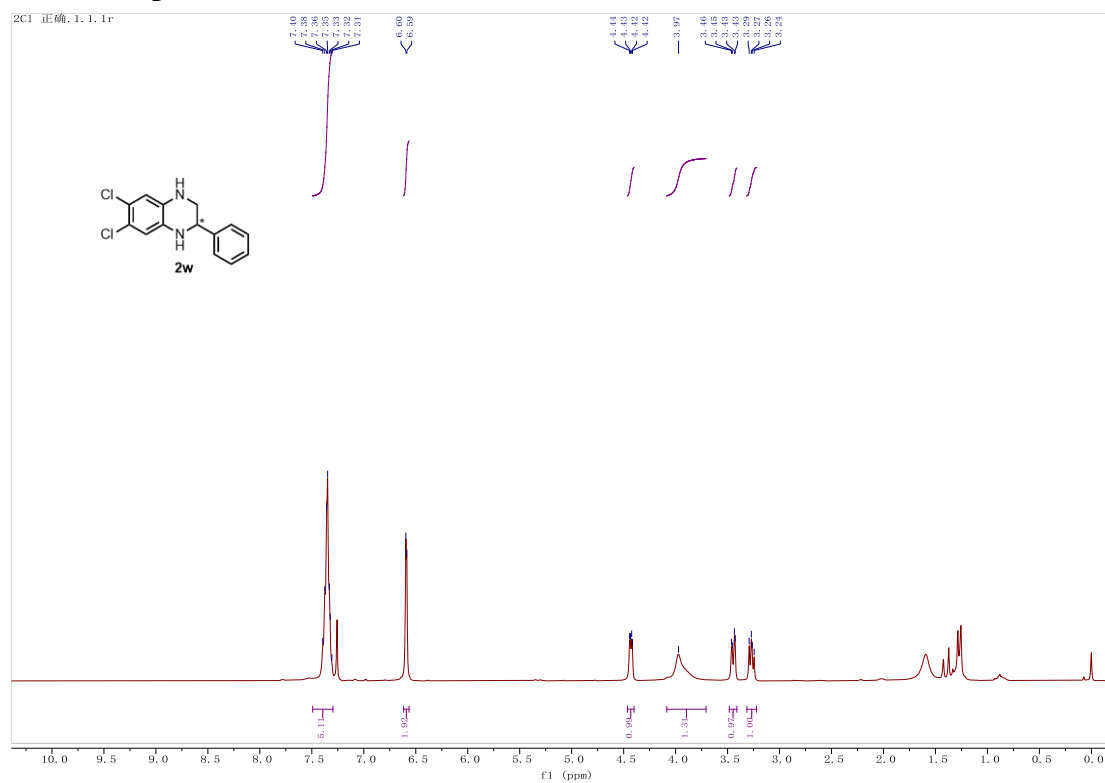

# <sup>13</sup>C NMR spectra for 2w

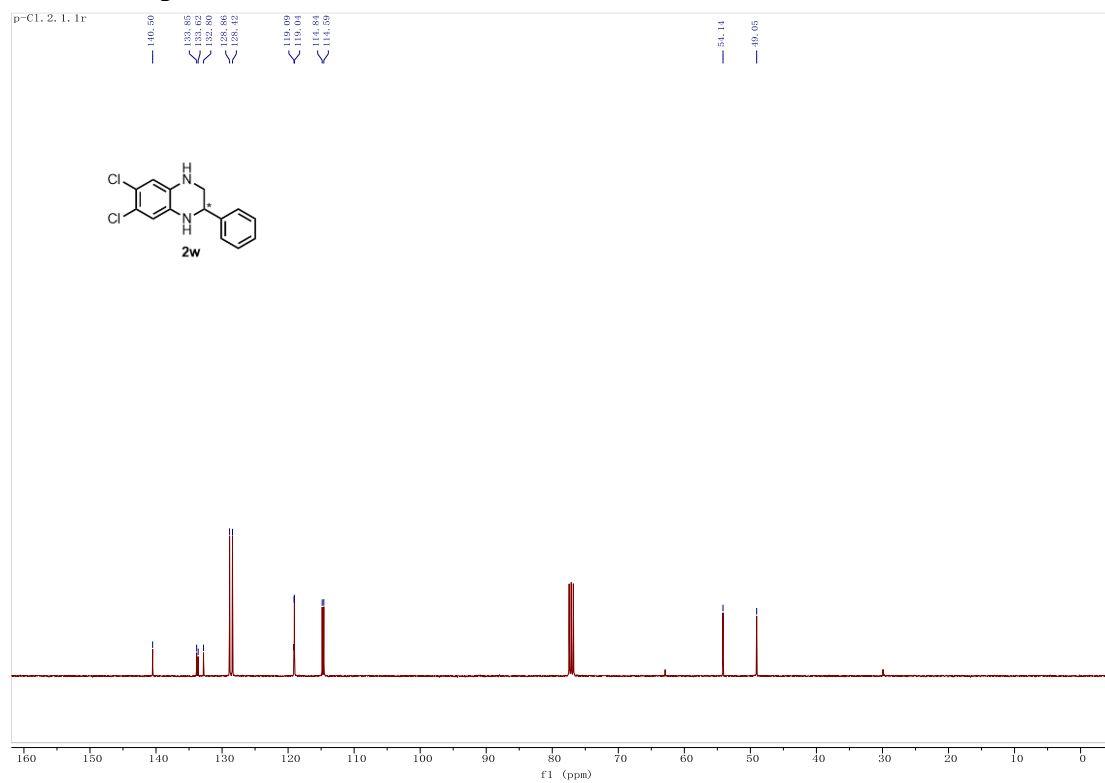

### <sup>1</sup>H NMR spectra for 2x

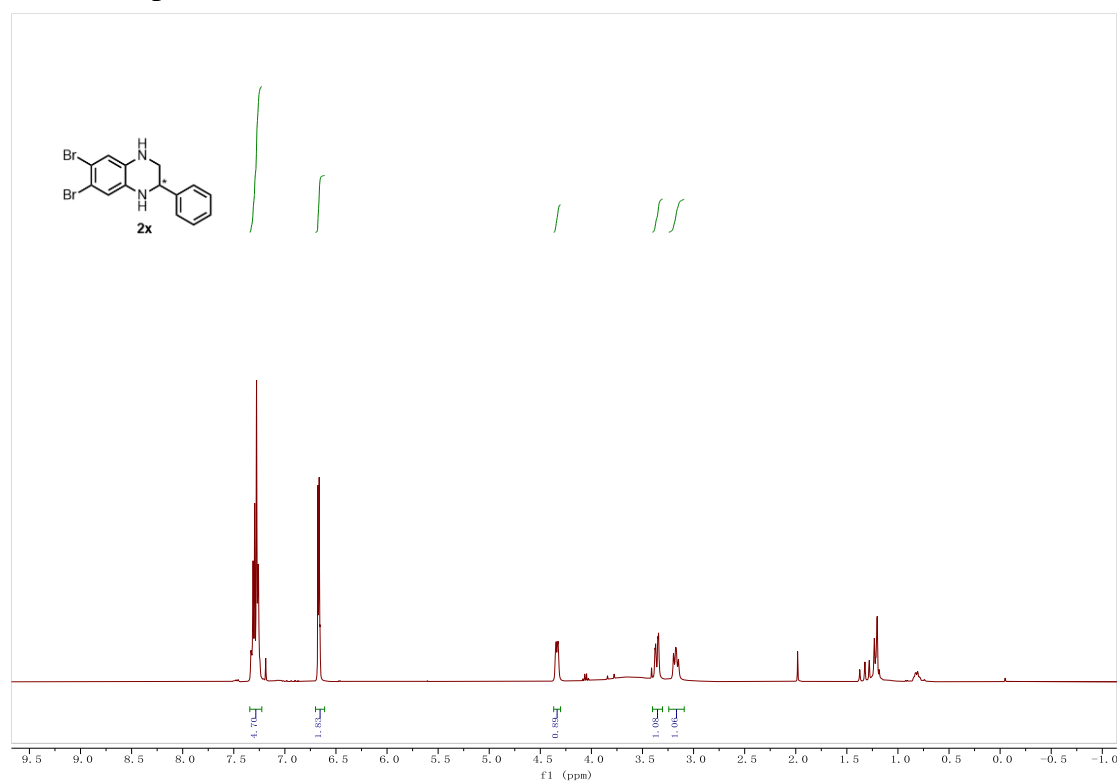

### <sup>13</sup>C NMR spectra for 2x

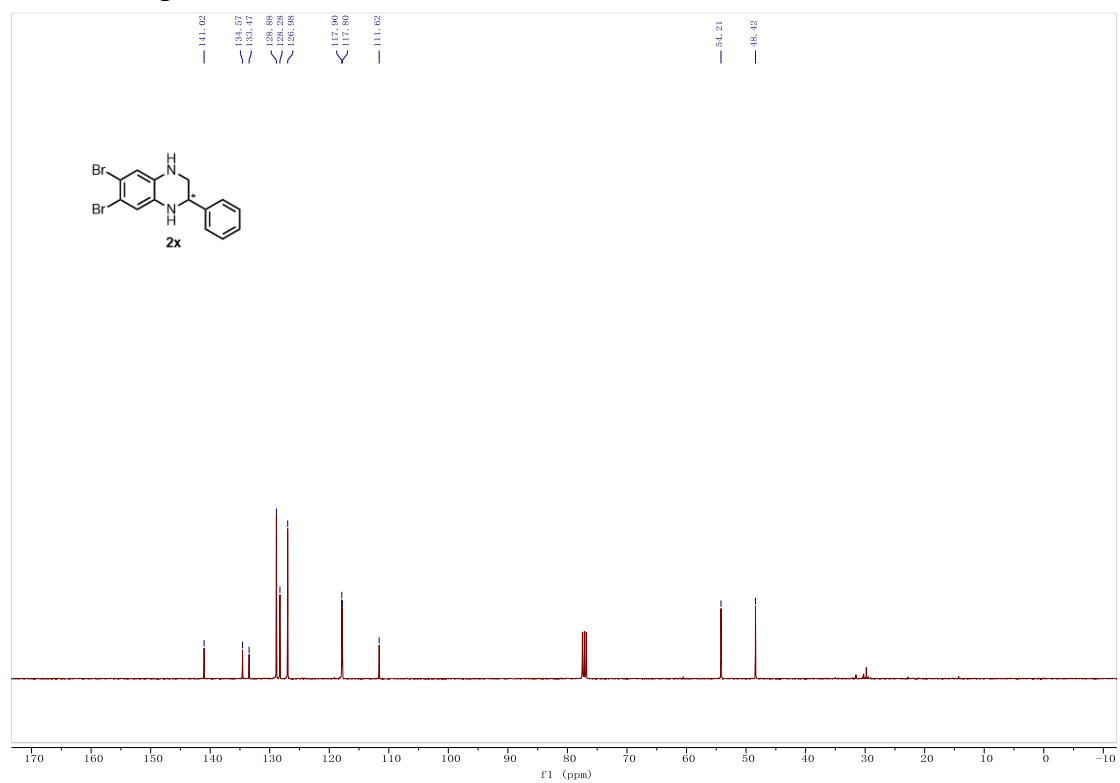



### <sup>1</sup>H NMR spectra for 2y

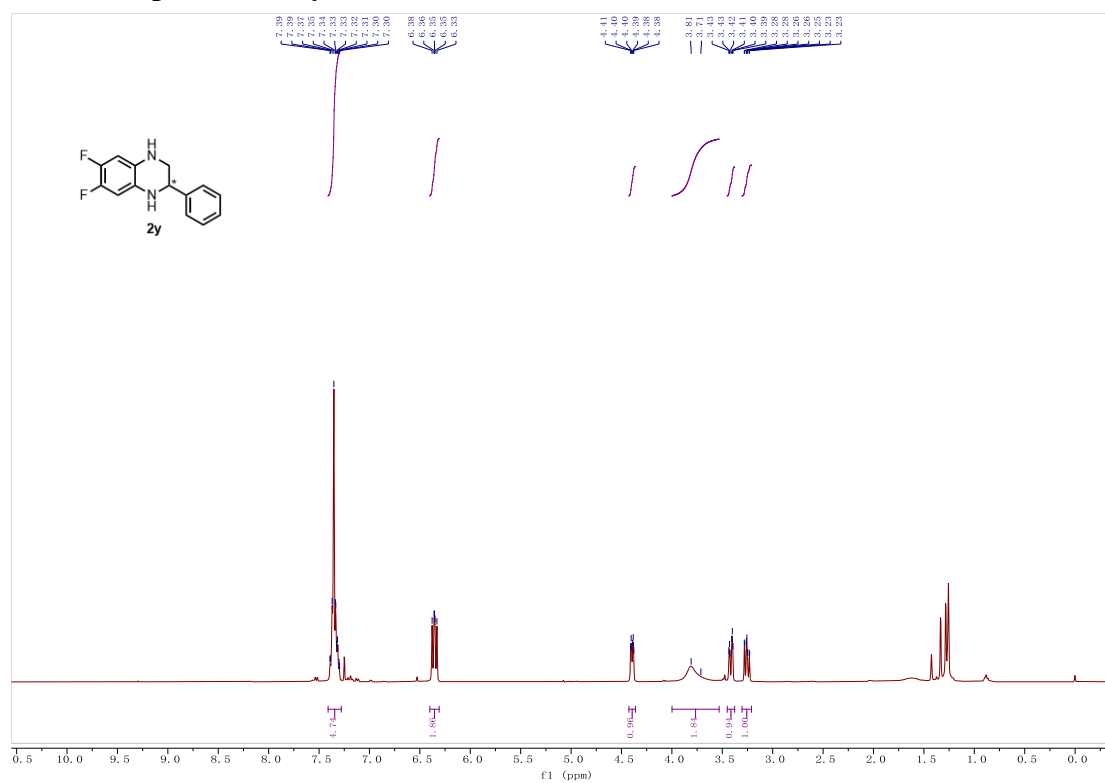

### <sup>13</sup>C NMR spectra for 2y

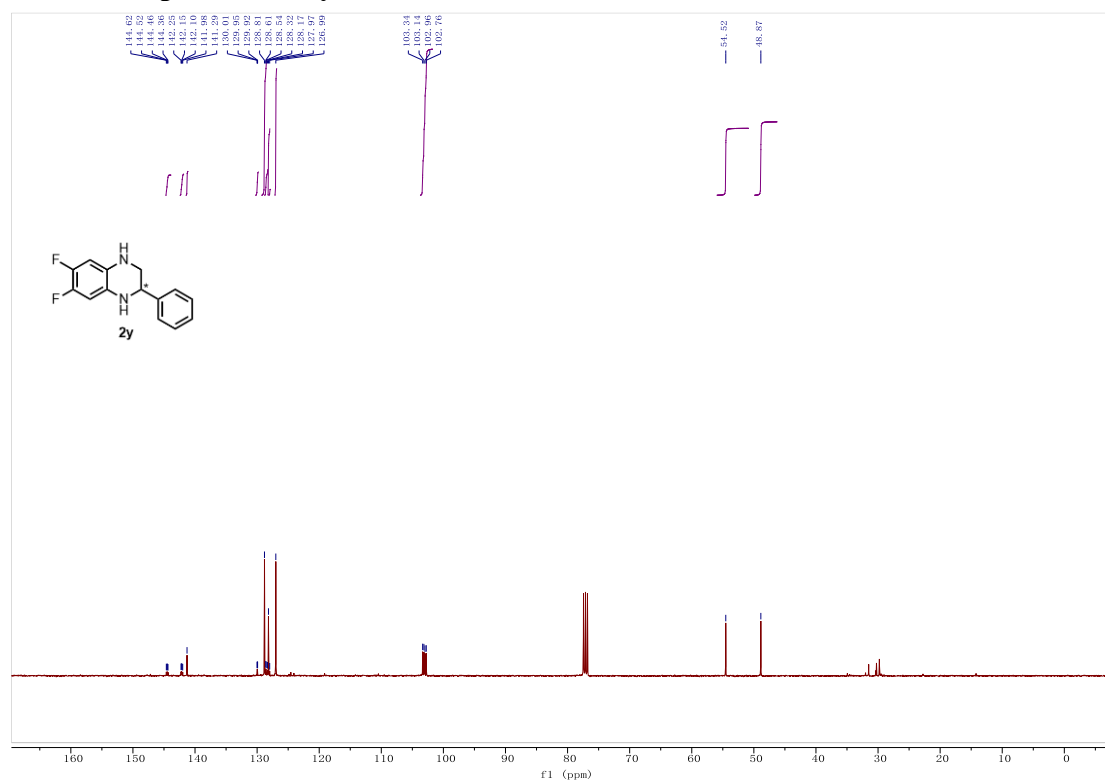

### <sup>1</sup>H NMR spectra for 4a

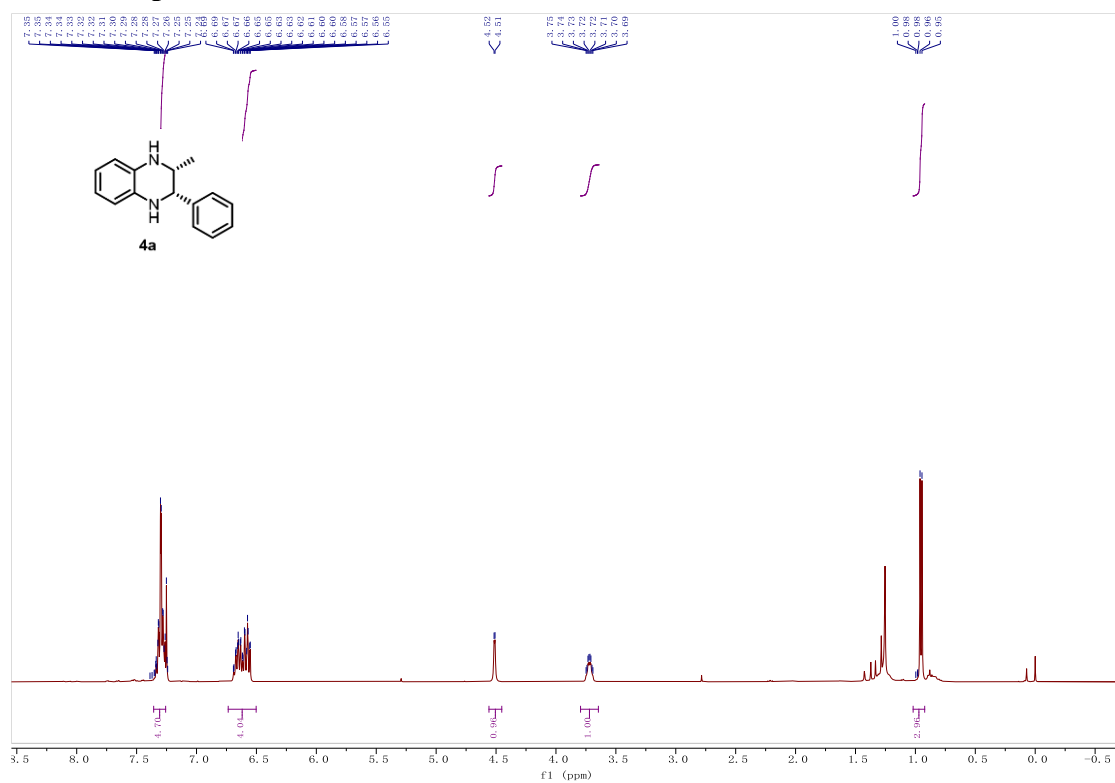

### <sup>13</sup>C NMR spectra for 4a

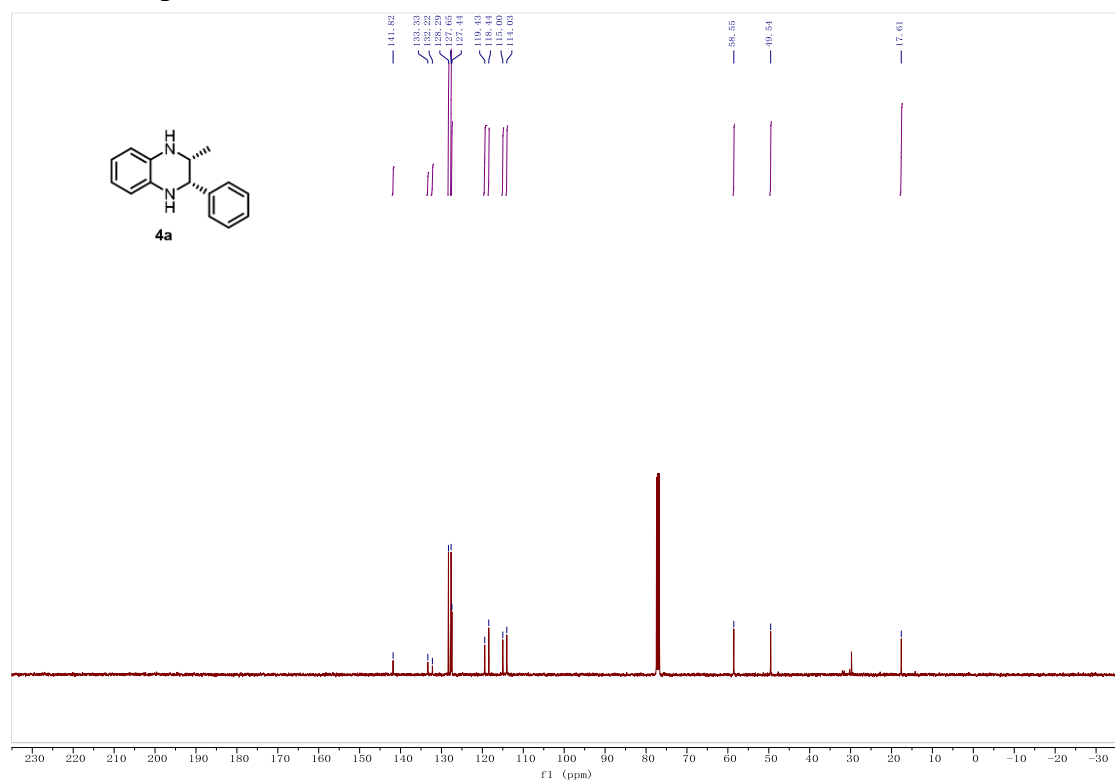

### <sup>1</sup>H NMR spectra for 4b

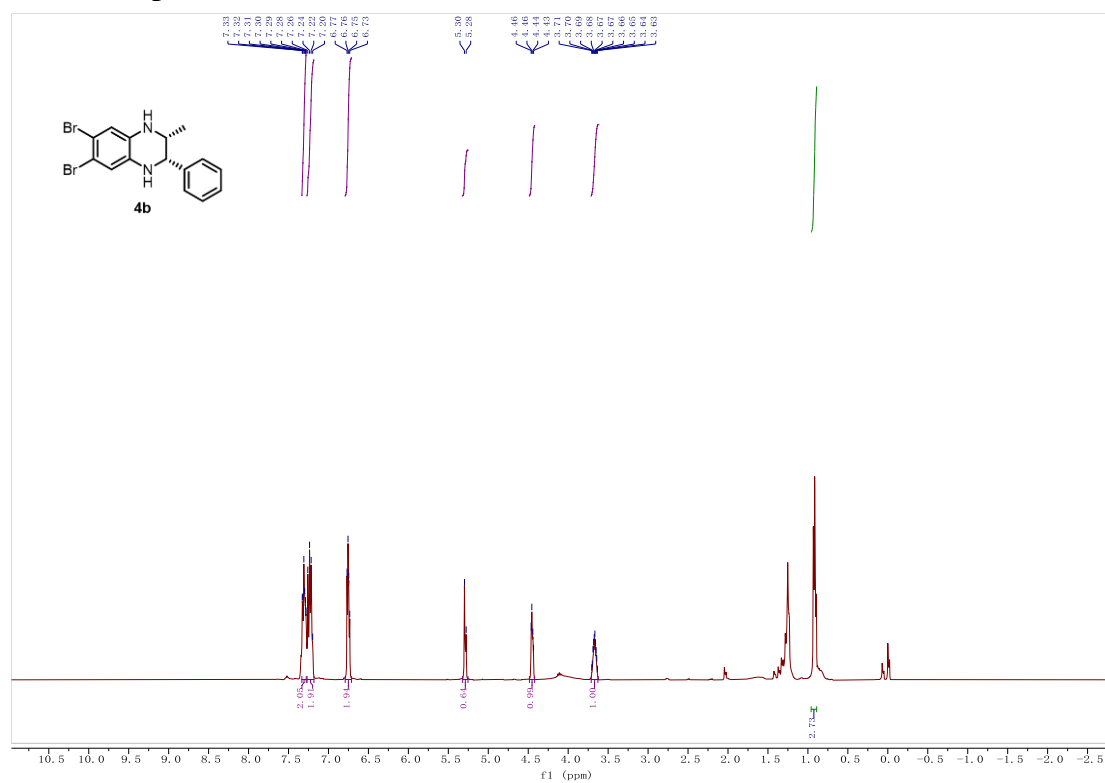

### <sup>13</sup>C NMR spectra for 4b

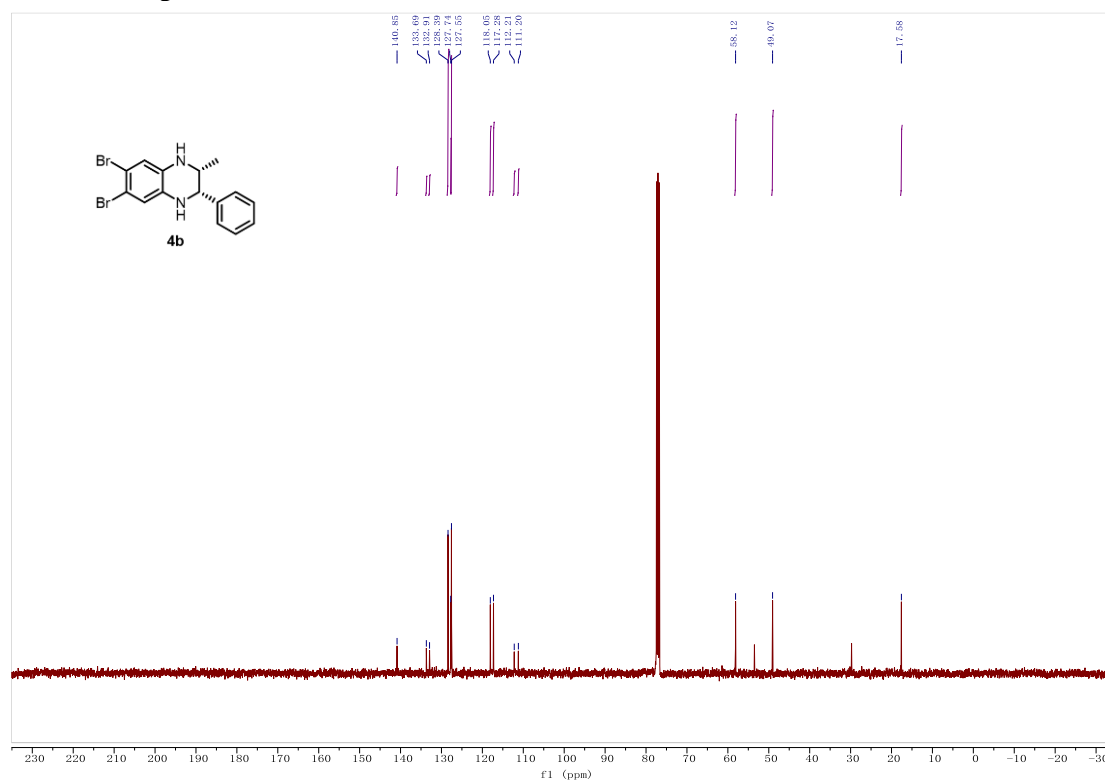

### <sup>1</sup>H NMR spectra for 4c

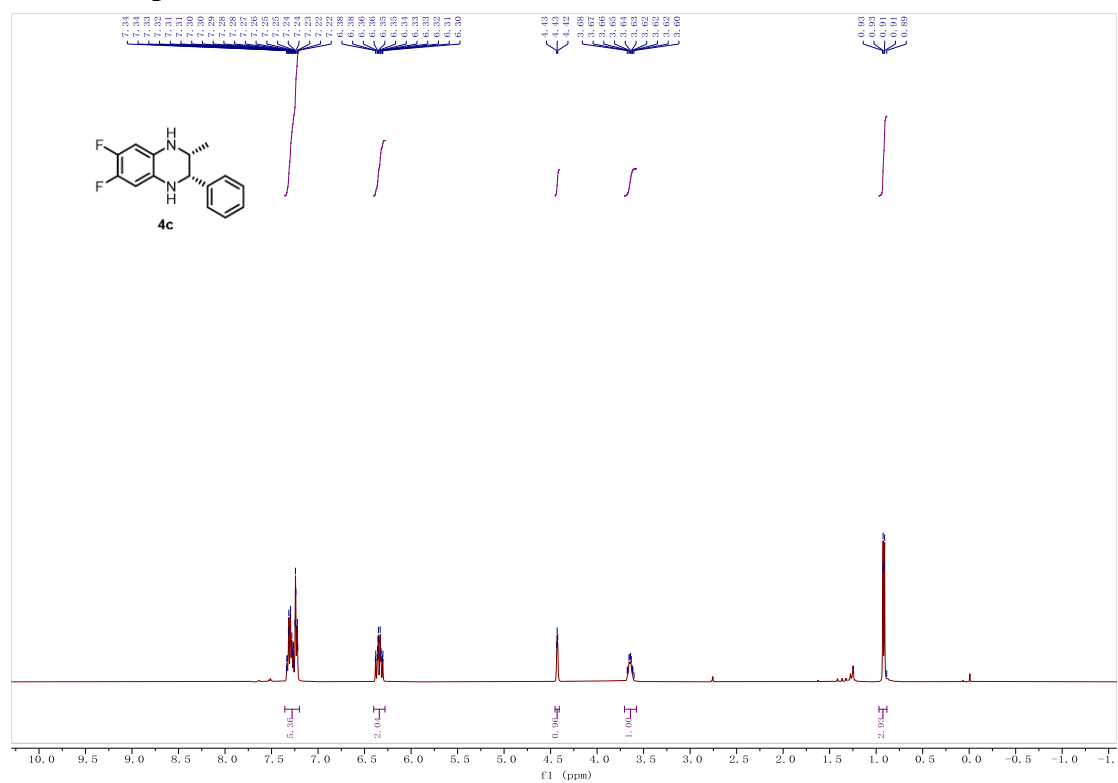

### <sup>13</sup>C NMR spectra for 4c

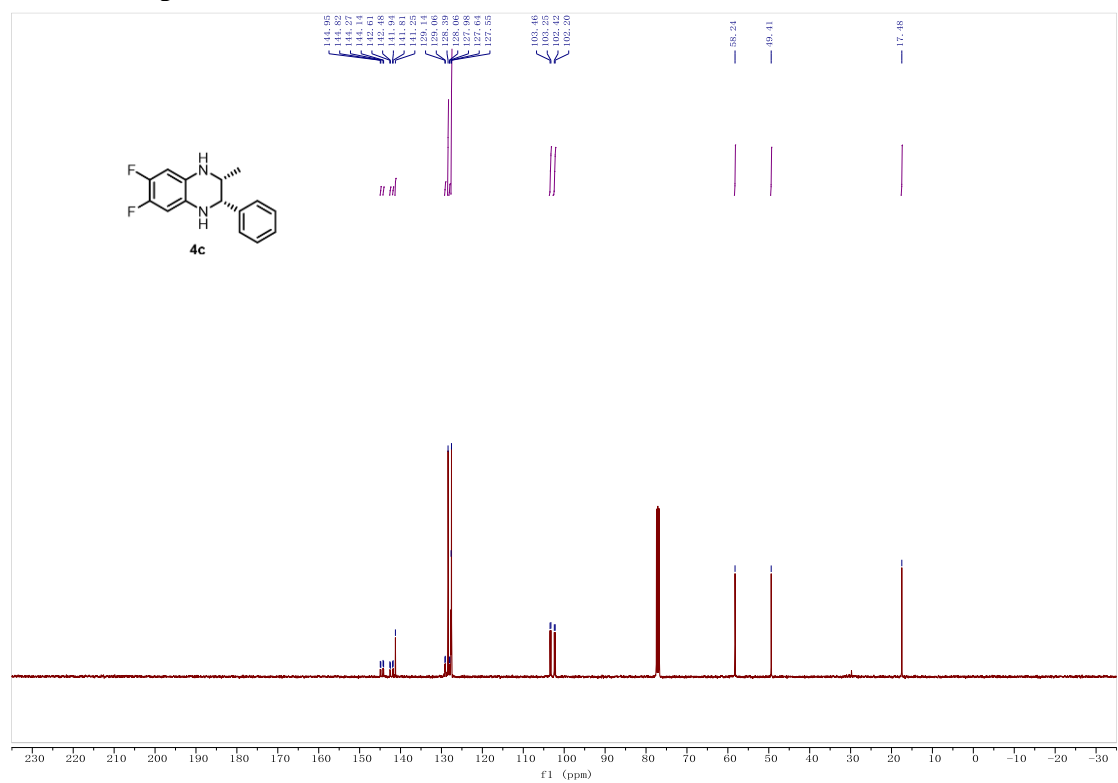

### <sup>1</sup>H NMR spectra for 4d

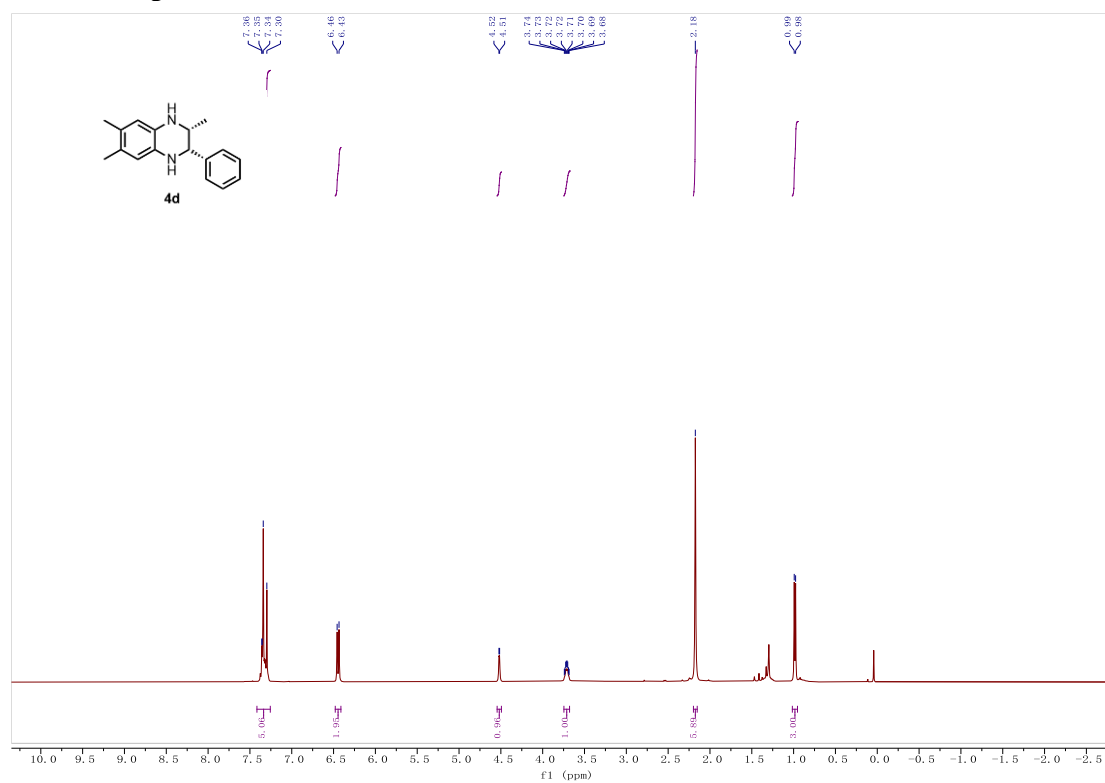

### <sup>13</sup>C NMR spectra for 4d

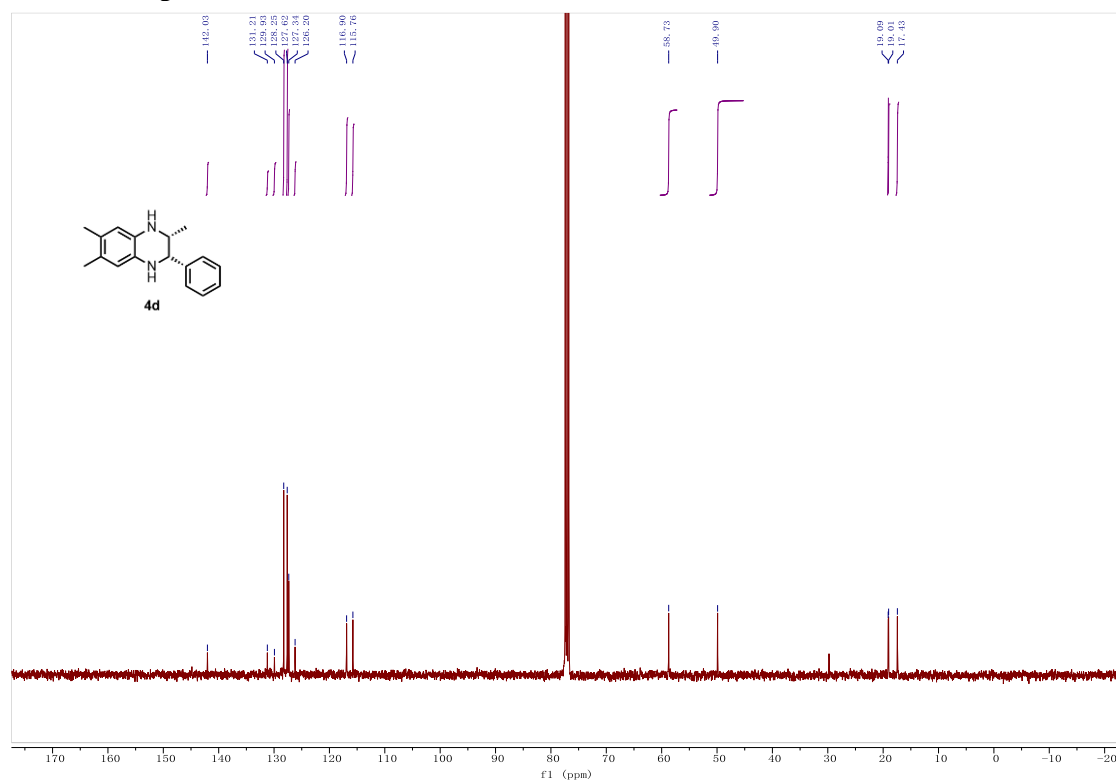

### <sup>1</sup>H NMR spectra for 4e

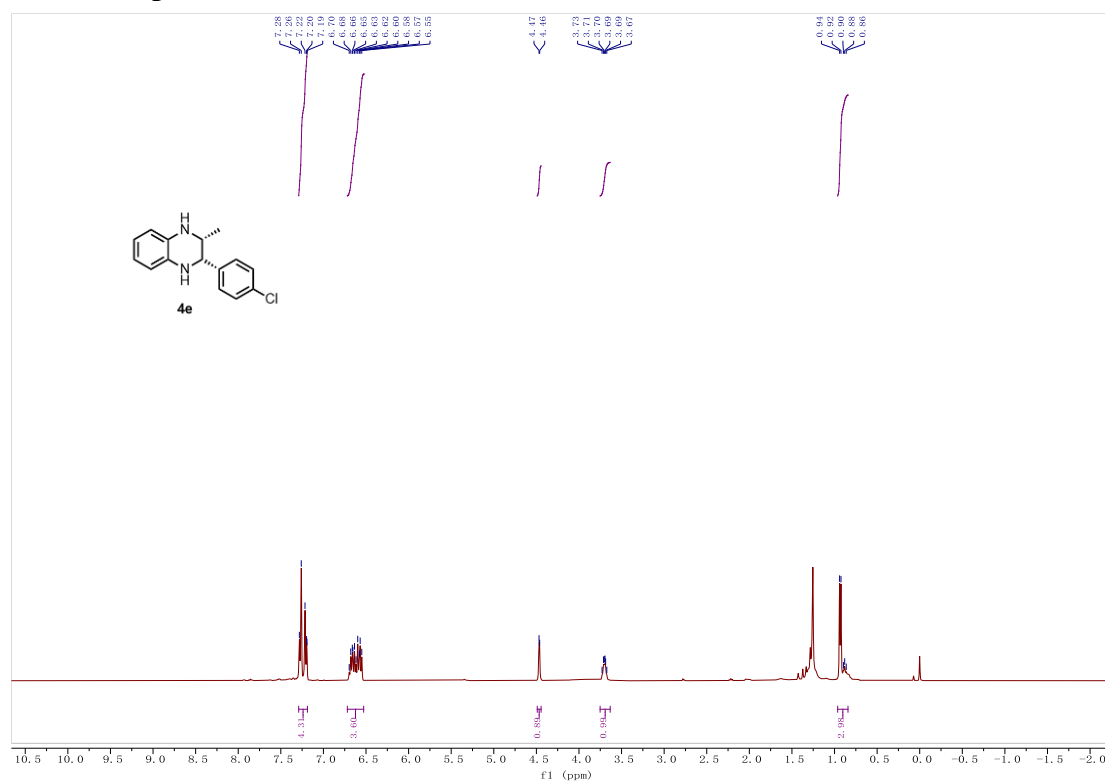

### <sup>13</sup>C NMR spectra for 4e

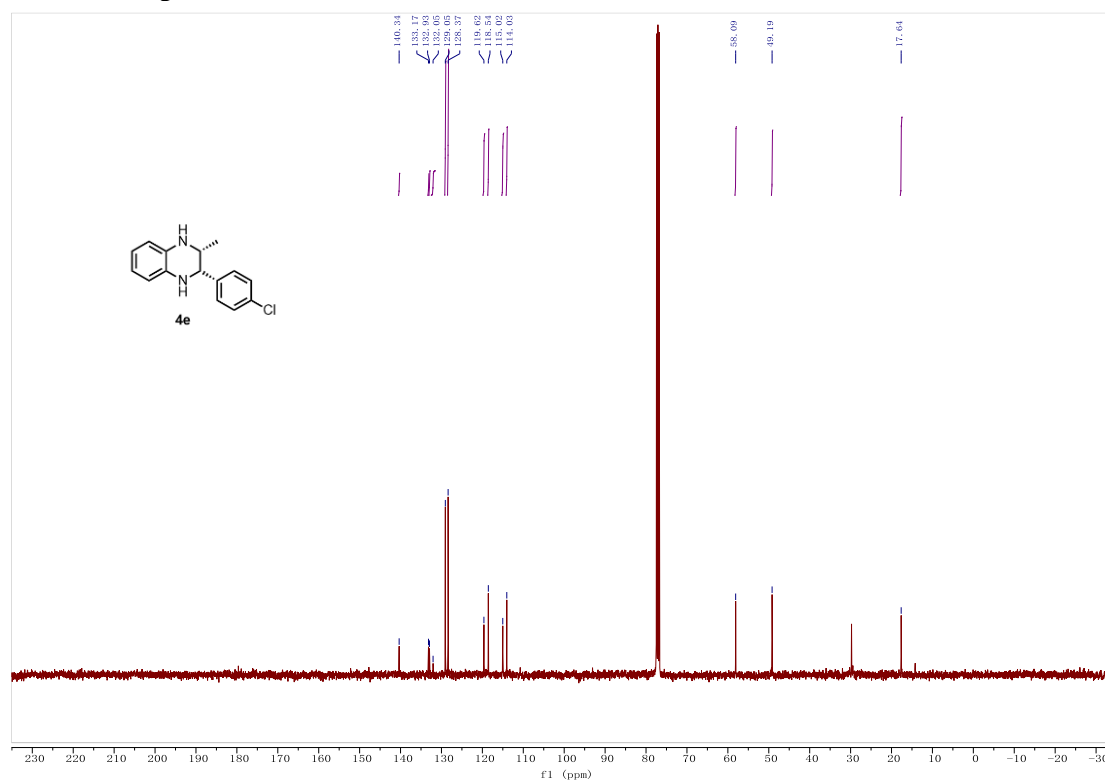

# <sup>1</sup>H NMR spectra for 4f

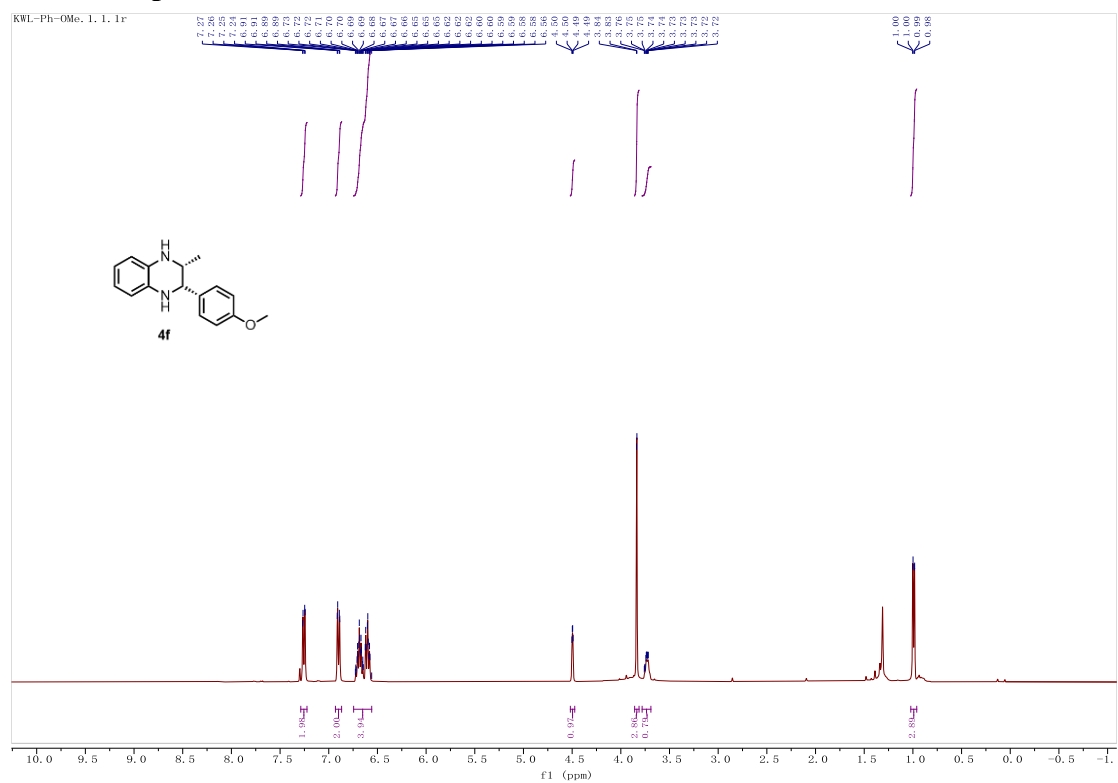

# <sup>13</sup>C NMR spectra for 4f

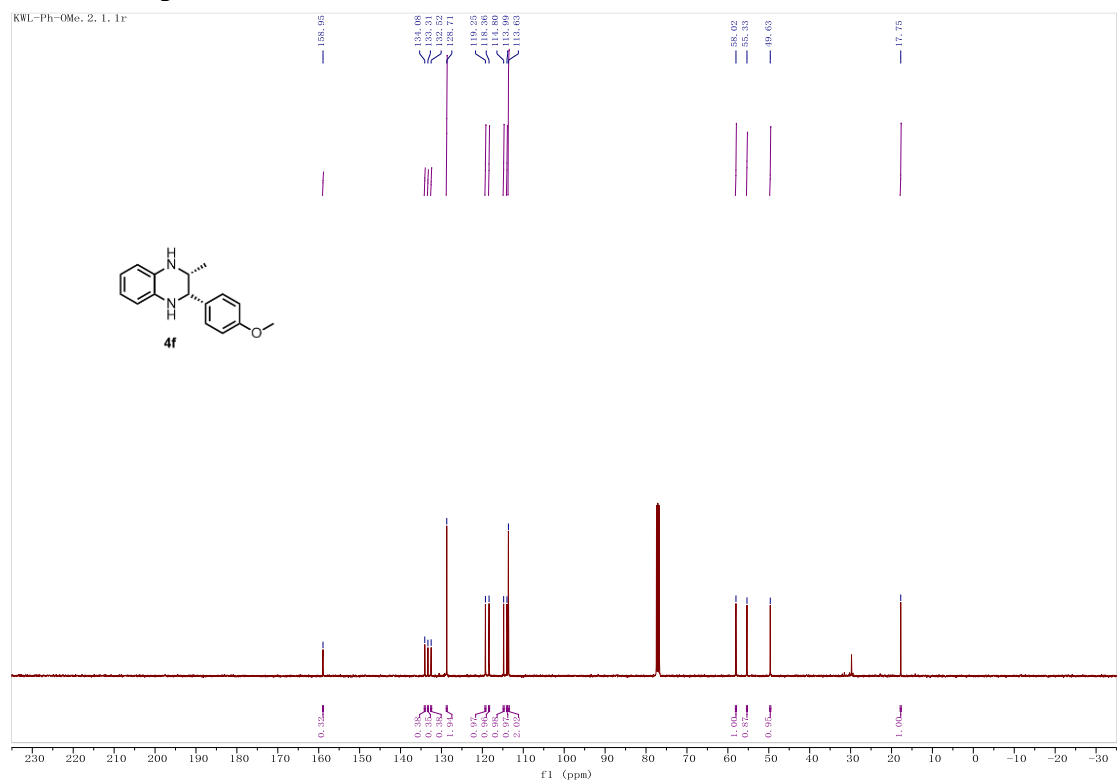

# <sup>1</sup>H NMR spectra for 4g

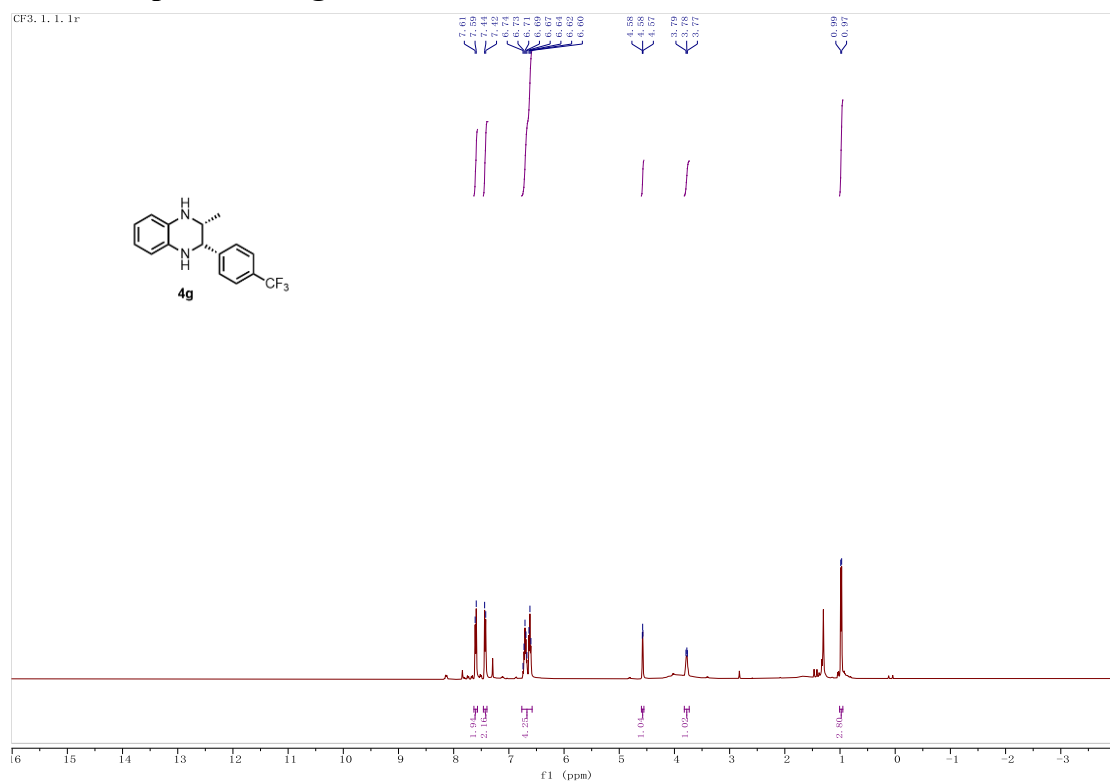

# <sup>13</sup>C NMR spectra for 4g

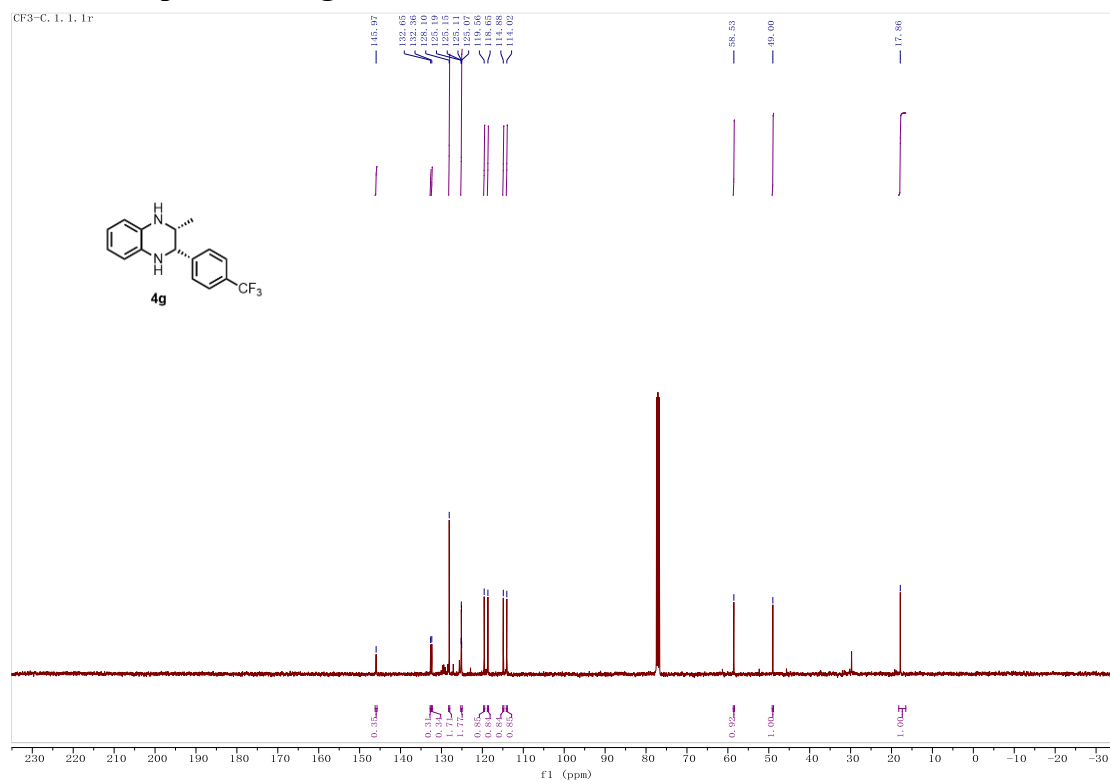



### <sup>1</sup>H NMR spectra for 4h

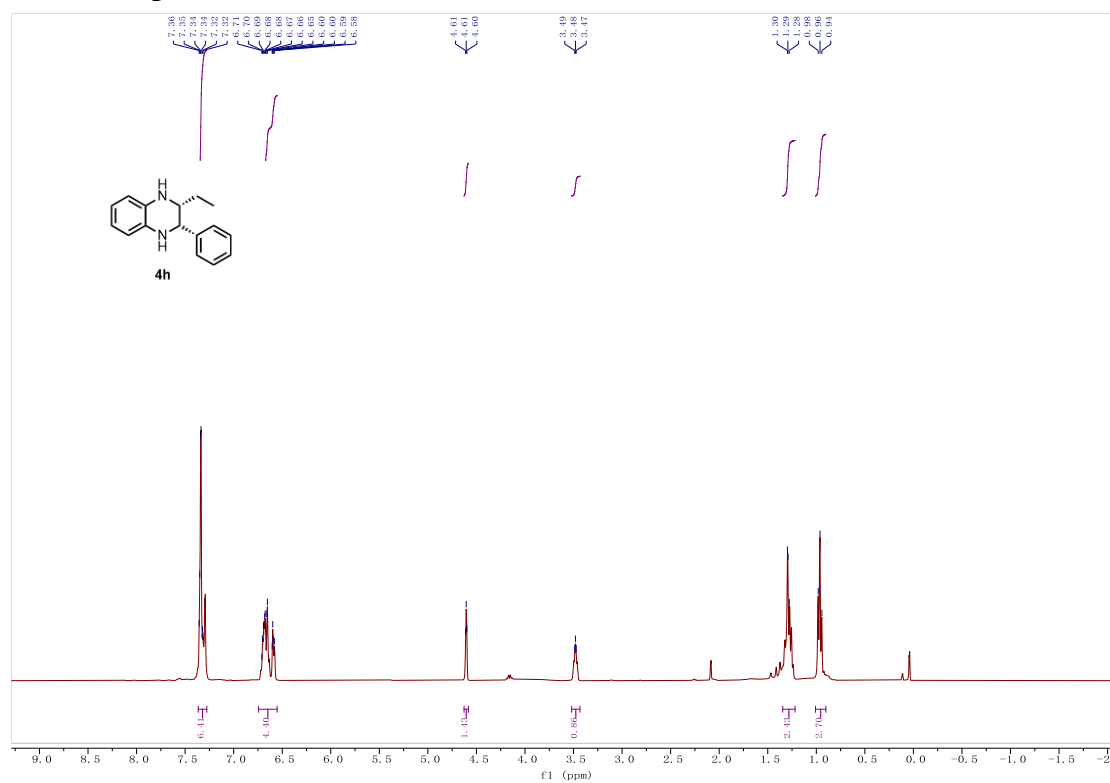

### <sup>13</sup>C NMR spectra for 4h

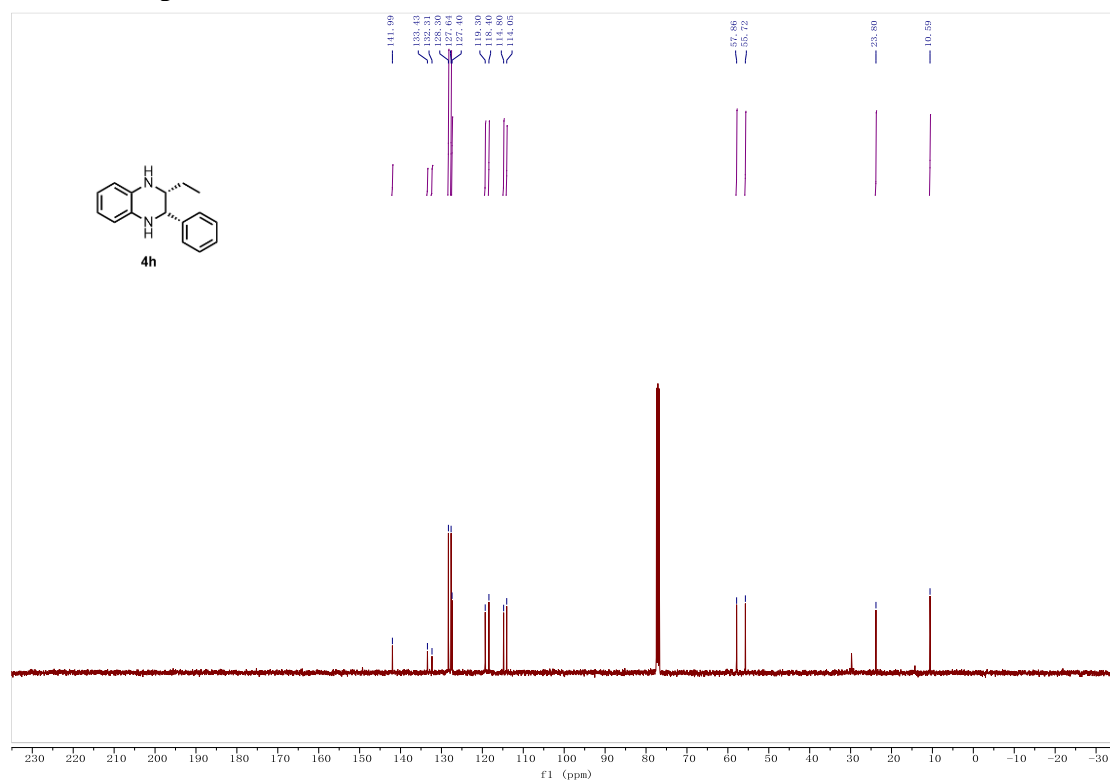

# <sup>1</sup>H NMR spectra for 5a

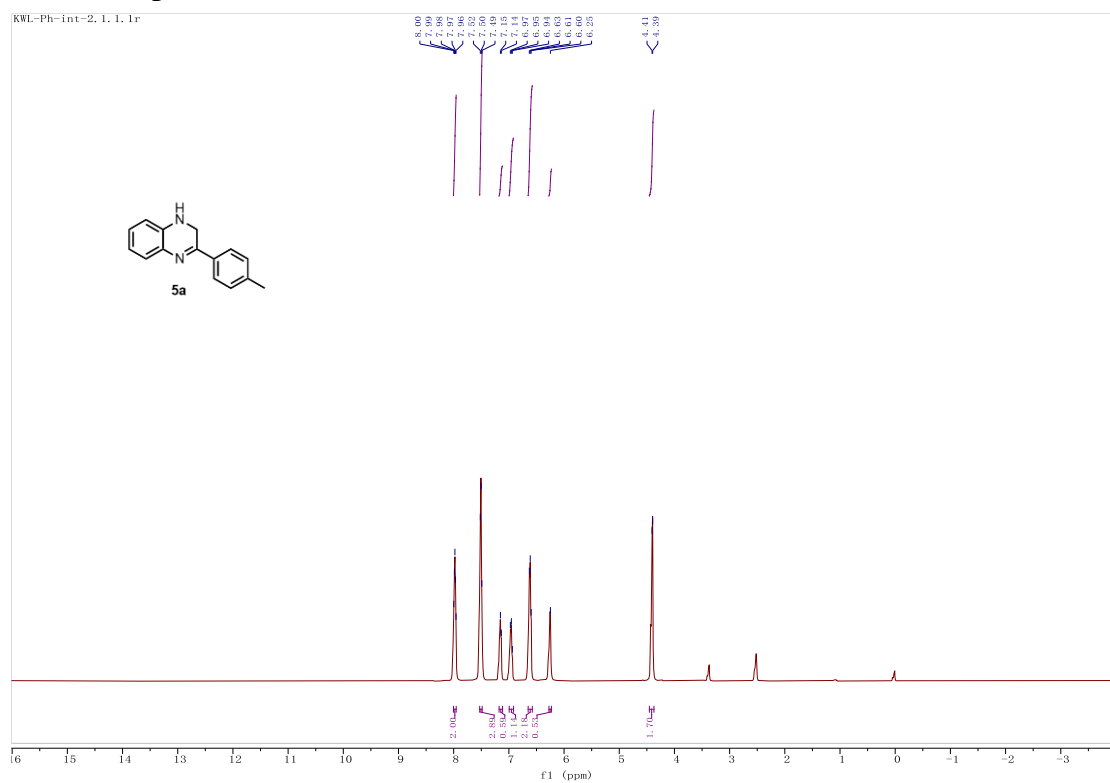

# <sup>13</sup>C NMR spectra for 5a

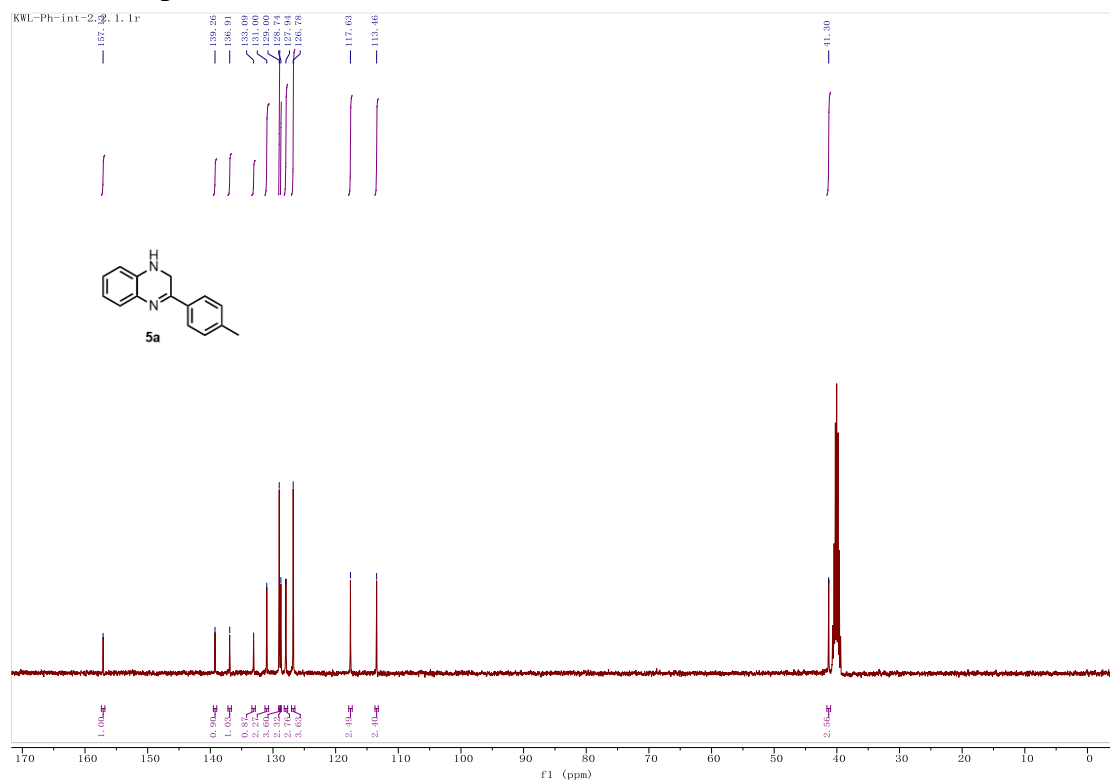

### <sup>1</sup>H NMR spectra for 6b

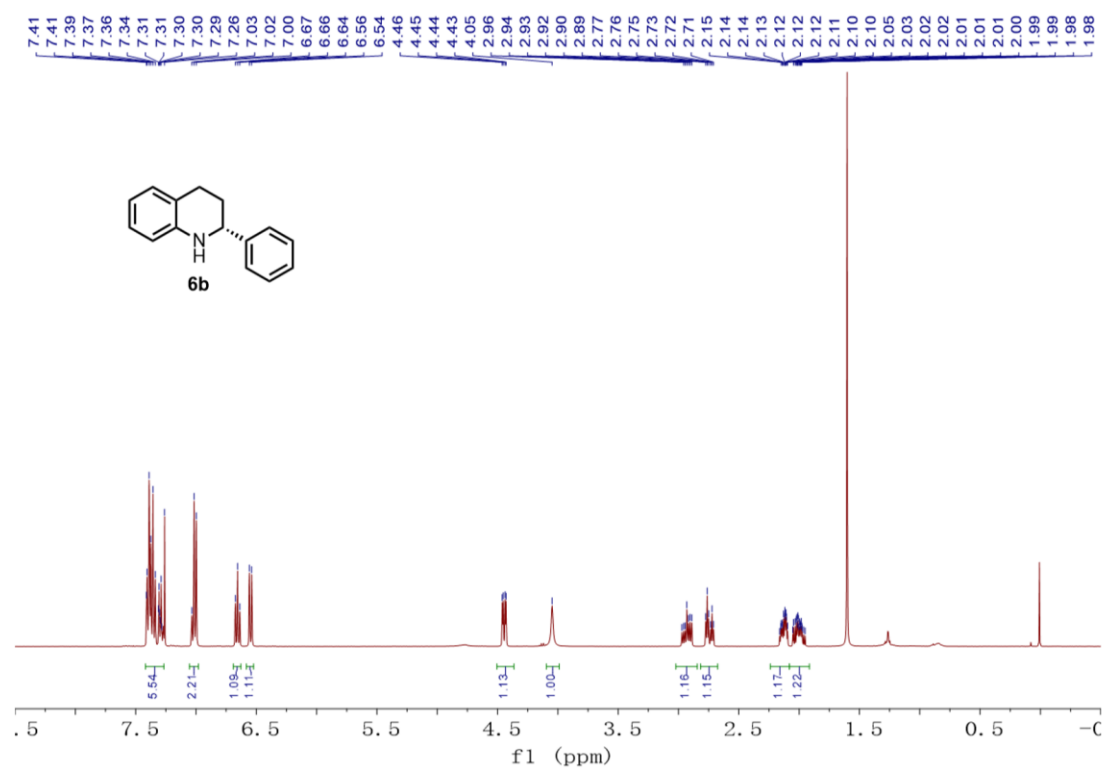

### <sup>13</sup>C NMR spectra for 6b

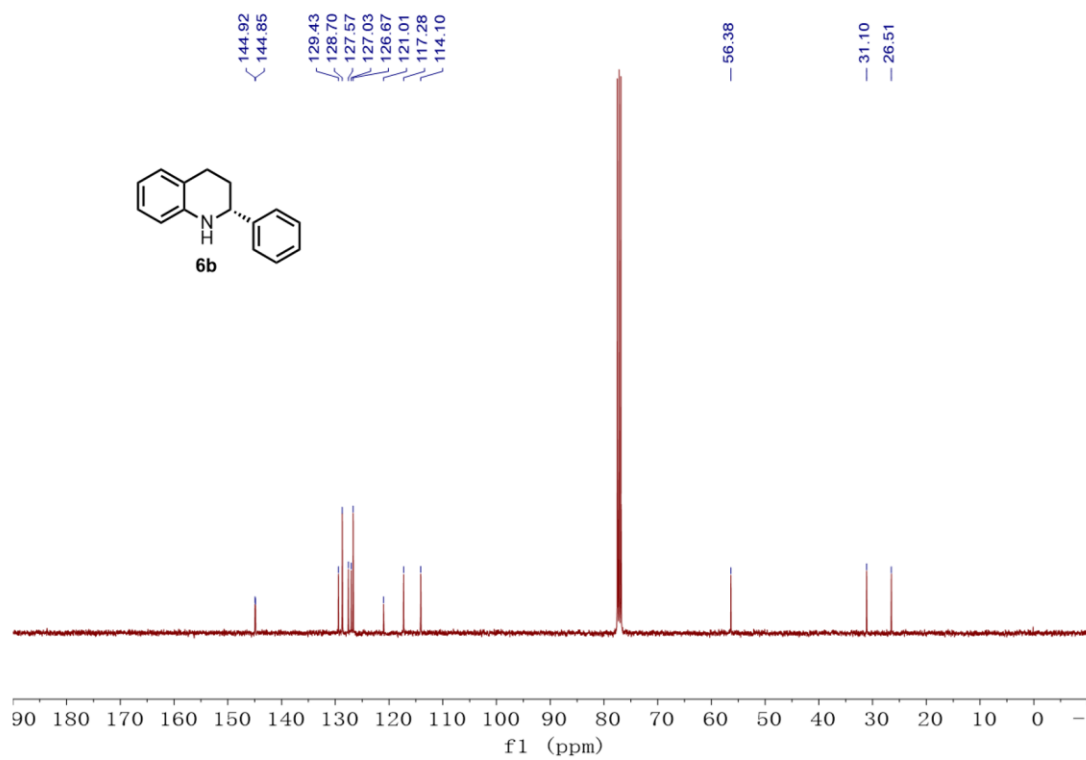

### <sup>1</sup>H NMR spectra for 6c

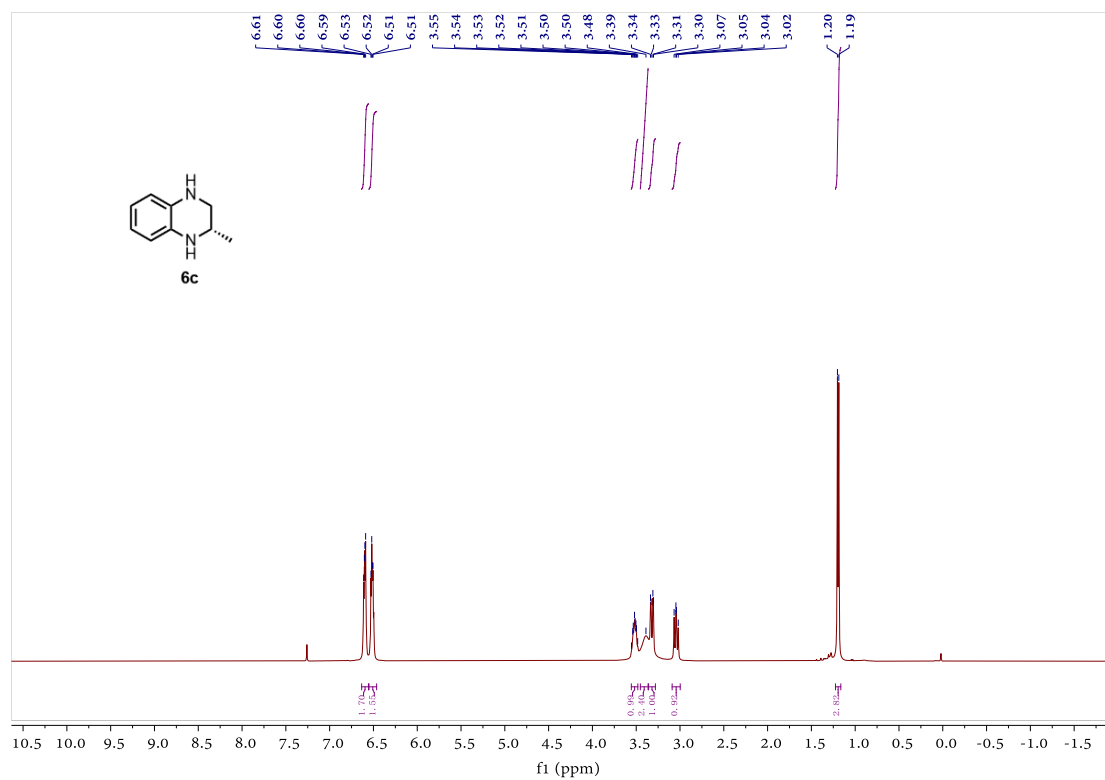

### <sup>13</sup>C NMR spectra for 6c

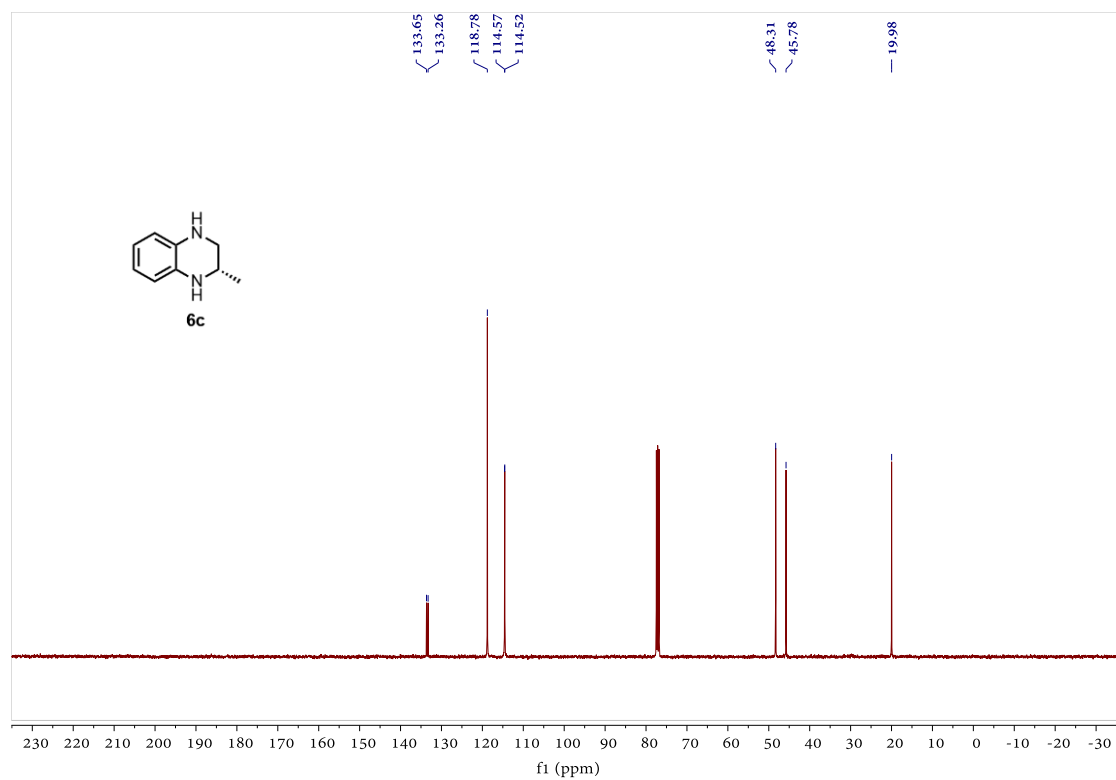

Supplement: d4sc04222k1.pdf [file d4sc04222k1.pdf]
